# Supplementary material for: Intronic enhancer region governs transcript-specific Bdnf expression in rodent neurons
Source: eLife. 2021 Feb 9;10:e65161. doi: 10.7554/eLife.65161 (PMC7891933; doi:10.7554/eLife.65161)
Supplement: Supplementary file 1. [file elife-65161-supp1.xlsx]

## Sheet: Primer sequences
Supplementary File 1
Primer sequences
rat
cDNA synthesis
rat Hprt1		AGCAAGTCTTTCAGTCCTGTC
rat Bdnf +3 kb eRNA		CGAAAGCATCCCAACTCTGC
RT-qPCR
rat Bdnf exon I	Forward	AACAAGACACATTACCTTCCAGCAT
	Reverse	CTCTTCTCACCTGGTGGAACATT
rat Bdnf exon IIc	Forward	TGGTATACTGGGTTAACTTTGGGAAA
	Reverse	CACTCTTCTCACCTGGTGGAACTT
rat Bdnf exon III	Forward	ATGCTTCATTGAGCCCAGTTC
	Reverse	CCGTGGACGTTTGCTTCTTTCA
rat Bdnf exon IV	Forward	GCTGCCTTGATGTTTACTTTGA
	Reverse	GCAACCGAAGTATGAAATAACC
rat Bdnf exon VI	Forward	GCTTTGTGTGGACCCTGAGTTC
	Reverse	CCGTGGACGTTTGCTTCTTTCAT
rat Bdnf exon IXa	Forward	GGACTGTGCTGCTGACTTGAAAGGA
	Reverse	GAGTAAACGGTTTCTAAGCAAGTG
rat Bdnf coding	Forward	GGCCCAACGAAGAAAACCAT
	Reverse	AGCATCACCCGGGAAGTGT
rat Hprt1	Forward	CAGTCCCAGCGTCGTGATTA
	Reverse	AGCAAGTCTTTCAGTCCTGTC
rat cyclophilin B	Forward	AGATCGAAGTGGAGAAACCCTTTG
	Reverse	TAAAAATCAGGCCTGTGGAATGTG
rat Bdnf +3 kb antisense eRNA	Forward	AAACGGGCAGTTGGATCAGA
	Reverse	GTAAACCCTGCCCTACGCTC
	ChIP-qPCR
Unrelated region (URR)	Forward	TAGACCCAGGAGGGAGTTATTTAAGAG
	Reverse	TTGGGAATGCAATGCAGTGTGTAC
rat Bdnf +3 kb enhancer region	Forward	GGGCAGGGTTTACGGATCAA
	Reverse	GGAACTGTCTGTGCCCCATT
rat Bdnf +21 kb control region	Forward	GCTGTGGGTTTGAACTGGTG
	Reverse	CCGTTTCCTAGTCCAGGCTC
rat Bdnf promoter IV	Forward	GACAGCTCACGTCAAGGCAG
	Reverse	CAGTCCTCTCCTCGGTGAATG
in vitro promoter pulldown
rat Bdnf +3 kb enhancer	Forward	AAGATTTCCAAAACTCAAGATTATTTTA
	Reverse	BIOTIN - ACAATTTCCTCCGCTCAACTG
rat Bdnf +11 kb intron	Forward	AGACCTAAAGTTTTCTGACTTACAAG
	Reverse	BIOTIN - GCATTAGACAGACACAAAACCCAG
Plasmid mutagenesis
rat Bdnf +3 kb enhancer Ebox mut	Forward	ACCCACCCTTCCCAGAACGTGCTGTTTTAAATAC
	Reverse	GTATTTAAAACAGCACGTTCTGGGAAGGGTGGGT
mouse
RT-qPCR
mouse Pou5f1	Forward	TGTTCAGCCAGACCACCATC
	Reverse	AGTTCGCTTTCTCTTCCGGG
mouse Sox2	Forward	CATGTCCTACTCGCAGCAGG
	Reverse	TGCTGATCATGTCCCGGAG
mouse Nes	Forward	AGGCGCTGGAACAGAGATT
	Reverse	TTCCAGGATCTGAGCGATCT
mouse Map2	Forward	CCCAAGCTAAAGTTGGCTCA
	Reverse	GATTCGAGCAGGTTGATGCT
mouse Tubb3	Forward	TAGACCCCAGCGGCAACTAT
	Reverse	GTTCCAGGTTCCAAGTCCACC
mouse Gria1	Forward	CGACCATTACAAGTGGCAGA
	Reverse	GAGCATCCGGTATCCTTCCT
mouse Bdnf exon I	Forward	AACAAGACACATTACCTTCCTGCAT
	Reverse	CTCTTCTCACCTGGTGGAACATT
mouse Bdnf exon IIc	Forward	TGGTATACTGGGTTAACTTTGGGAAA
	Reverse	CACTCTTCTCACCTGGTGGAACTT
mouse Bdnf exon III	Forward	ATGCTTCATTGAGCCCAGTTC
	Reverse	CCGTGGACGTTTACTTCTTTCA
mouse Bdnf exon IV	Forward	GCTGCCTTGATGTTTACTTTGA
	Reverse	GCAACCGAAGTATGAAATAACC
mouse Bdnf exon VI	Forward	GCTTTGTGTGGACCCTGAGTTC
	Reverse	CCGTGGACGTTTACTTCTTTCAT
mouse Bdnf coding	Forward	GGCCCAACGAAGAAAACCAT
	Reverse	AGCATCACCCGGGAAGTGT
mouse Cnot4	Forward	CGCCACCCCAACCCTATACCA
	Reverse	GCCGAATGCTGCTTGCCAGT
PCR-based genotyping of mESC cell lines
mouse Bdnf +3 kb enhancer flanking proximal	Forward	AGTTCAGGGACTTGCGTGC
	Reverse	TGAAATACCTTTGCTTTTGCGT
mouse Bdnf +3 kb enhancer flanking distal	Forward	TGAGAACCTGGGGCAAATCG
	Reverse	GGAACATGGTCCCCAAGATCA
qPCR-based copy number measurement of mESC cell lines
mouse Bdnf +3 kb enhancer 5' flank distal	Forward	ATTGAGCCCAGGTCCGAGT
	Reverse	CCGGGCTCTTCGATCTAGAAA
mouse Bdnf +3 kb enhancer 5' flank proximal	Forward	AGTTCAGGGACTTGCGTGC
	Reverse	GCCTTACTCCGAAAGCTGCG
mouse Bdnf +3 kb enhancer core region	Forward	ATGCAATTCCAAGCGTGCTG
	Reverse	CAGCCCTGCAGATCCGTATT
mouse Bdnf +3 kb enhancer 3' flank proximal	Forward	ACGTCATCCTCTTACACCCAAG
	Reverse	TGAAATACCTTTGCTTTTGCGT
mouse Bdnf +3 kb enhancer 3' flank distal	Forward	TCTGAACAGCACTGACTTGCC
	Reverse	GAGATACTTCTGAGGTAGCAGTTG
mouse Sox2 genomic region	Forward	CATGTCCTACTCGCAGCAGG
	Reverse	TGCTGATCATGTCCCGGAG
