# Supplementary material for: Intronic enhancer region governs transcript-specific Bdnf expression in rodent neurons
Source: eLife. 2021 Feb 9;10:e65161. doi: 10.7554/eLife.65161 (PMC7891933; doi:10.7554/eLife.65161)
Supplement: Supplementary file 2. [file elife-65161-supp2.xlsx]

## Sheet: gRNA targeting sequences
Supplementary File 2
gRNA targeting sequences
rat
negative gRNA	GCTGATCTATCGCGGTCGTC
rat Bdnf +3 kb enhancer gRNA 1	TCAGATCTACGCGAAAGGAG
rat Bdnf +3 kb enhancer gRNA 2	TTTGTCTGACAGTTGAGCGG
rat Bdnf +3 kb enhancer gRNA 3	GAGTGAGGAACGTTATGGAG
rat Bdnf +3 kb enhancer gRNA 4	ATAGGCTGTTCGCCACACAA
rat Bdnf +11 kb intron gRNA 1	CAGTATTTCTATGTAATGGG
rat Bdnf +11 kb intron gRNA 2	AGGCTACCCTGGGTAAGTTG
rat Bdnf +11 kb intron gRNA 3	CACAATCATAGAACGGAGCA
rat Bdnf +11 kb intron gRNA 4	AATAATTAATTGTACTAGAG
mouse
mouse Bdnf +3 kb enhancer gRNA 1	AAAGCATCCCAACTCTGCGC
mouse Bdnf +3 kb enhancer gRNA 2	TTGTGTGGCGAACAGCCTAT
mouse Bdnf +3 kb enhancer gRNA 3	TCTACGCGAAAGGAGCGGAG
mouse Bdnf +3 kb enhancer gRNA 4	CCCAGCGGCAACCAGTTGGA
mouse Bdnf +3 kb enhancer gRNA 5	GAGCAAGGCATGGCGCGGGA
mouse Bdnf +3 kb enhancer gRNA 6	GGTATCATGTCTGGGCGACA
