# Supplementary material for: Intronic enhancer region governs transcript-specific Bdnf expression in rodent neurons
Source: eLife. 2021 Feb 9;10:e65161. doi: 10.7554/eLife.65161 (PMC7891933; doi:10.7554/eLife.65161)
Supplement: Supplementary file 3. — MaxQuant ProteinGroups tables of two biological replicates are shown in separate Excel sheets. Refer to the MaxQuant documentation (http://coxdocs.org/doku.php?id=maxquant:table:proteingrouptable) for detailed column descriptions. [file elife-65161-supp3.xlsx]

## Sheet: Replicate1
Protein IDs	Majority protein IDs	Peptide counts (all)	Peptide counts (razor+unique)	Peptide counts (unique)	Protein names	Gene names	Fasta headers	Number of proteins	Peptides	Razor + unique peptides	Unique peptides	Peptides +11kb_probe	Peptides +3kb_probe	Razor + unique peptides +11kb_probe	Razor + unique peptides +3kb_probe	Unique peptides +11kb_probe	Unique peptides +3kb_probe	Sequence coverage [%]	Unique + razor sequence coverage [%]	Unique sequence coverage [%]	Mol. weight [kDa]	Sequence length	Sequence lengths	Q-value	Score	Sequence coverage +11kb_probe [%]	Sequence coverage +3kb_probe [%]	Intensity	Intensity +11kb_probe	Intensity +3kb_probe	LFQ intensity +11kb_probe	LFQ intensity +3kb_probe	MS/MS count +11kb_probe	MS/MS count +3kb_probe	MS/MS count	Only identified by site	Reverse	Potential contaminant	id	Peptide IDs	Peptide is razor	Mod. peptide IDs	Evidence IDs	MS/MS IDs	Best MS/MS	Oxidation (M) site IDs	Oxidation (M) site positions
P63090	P63090	29	29	29	Pleiotrophin	Ptn	sp|P63090|PTN_RAT Pleiotrophin OS=Rattus norvegicus OX=10116 GN=Ptn PE=1 SV=1	1	29	29	29	28	26	28	26	28	26	67.9	67.9	67.9	18.869	168	168	0	323.31	67.3	67.9	134420000000	62134000000	72289000000	65405000000	50797000000	125	114	239				280	147;148;292;293;435;984;1142;1143;1157;1158;1350;1594;1595;1621;1622;1623;1709;1842;1843;1844;2210;2211;2217;2307;2346;2347;2425;2603;2604	True;True;True;True;True;True;True;True;True;True;True;True;True;True;True;True;True;True;True;True;True;True;True;True;True;True;True;True;True	152;153;300;301;446;447;1002;1160;1161;1175;1176;1369;1621;1622;1648;1649;1650;1736;1870;1871;1872;2246;2247;2248;2254;2346;2385;2386;2464;2647;2648	321;322;323;324;325;326;327;328;329;330;331;625;626;627;628;629;630;631;632;633;634;635;636;637;638;639;640;641;642;938;939;940;941;942;943;944;945;946;947;948;949;950;2094;2095;2434;2435;2436;2437;2438;2485;2486;2487;2488;2489;2490;2491;2492;2493;2494;2495;2861;2862;2863;2864;2865;2866;2867;2868;2869;2870;2871;2872;2873;2874;2875;2876;2877;2878;3391;3392;3393;3448;3449;3450;3451;3452;3453;3622;3…	348;349;350;351;352;353;354;355;356;357;358;359;360;361;362;363;364;678;679;680;681;682;683;684;685;686;687;688;689;690;691;692;693;694;695;696;697;698;699;700;701;702;703;704;705;706;1025;1026;1027;1028;1029;1030;1031;1032;1033;1034;1035;1036;1037;1038;1039;1040;1041;1042;1043;1044;1045;1046;2240;2241;2242;2243;2244;2245;2246;2247;2248;2603;2604;2605;2606;2607;2686;2687;2688;2689;2690;2691;2692;…	350;364;683;701;1041;2243;2603;2605;2688;2696;3114;3669;3670;3725;3729;3731;3907;4288;4290;4294;5176;5188;5204;5428;5531;5557;5788;6209;6212	28	80
Q00566-2;A0A0G2JWK2;Q00566	Q00566-2;A0A0G2JWK2;Q00566	67;66;66	67;66;66	67;66;66	Methyl-CpG-binding protein 2	Mecp2	sp|Q00566-2|MECP2_RAT Isoform B of Methyl-CpG-binding protein 2 OS=Rattus norvegicus OX=10116 GN=Mecp2;tr|A0A0G2JWK2|A0A0G2JWK2_RAT Methyl-CpG-binding protein 2 OS=Rattus norvegicus OX=10116 GN=Mecp2 PE=1 SV=1;sp|Q00566|MECP2_RAT Methyl-CpG-binding protein	3	67	67	67	61	62	61	62	61	62	85.6	85.6	85.6	55.082	520	520;492;492	0	323.31	83.7	78.1	74366000000	29954000000	44412000000	29907000000	33380000000	126	149	275				285	0;5;6;45;46;58;97;98;99;179;243;326;327;355;356;415;416;432;433;498;499;509;510;513;514;634;635;738;762;763;772;789;833;834;1028;1029;1049;1137;1138;1174;1296;1297;1444;1445;1739;1802;1816;1817;1864;1865;1940;1970;1993;2059;2060;2061;2167;2168;2295;2300;2301;2304;2403;2439;2440;2554;2586	True;True;True;True;True;True;True;True;True;True;True;True;True;True;True;True;True;True;True;True;True;True;True;True;True;True;True;True;True;True;True;True;True;True;True;True;True;True;True;True;True;True;True;True;True;True;True;True;True;True;True;True;True;True;True;True;True;True;True;True;True;True;True;True;True;True;True	0;5;6;47;48;60;99;100;101;102;184;251;334;335;364;365;366;426;427;443;444;510;511;521;522;525;526;647;648;753;777;778;779;788;805;850;851;1046;1047;1067;1155;1156;1192;1315;1316;1465;1466;1467;1766;1830;1844;1845;1892;1893;1972;2002;2003;2026;2092;2093;2094;2203;2204;2333;2338;2339;2343;2442;2479;2480;2597;2630	0;8;9;10;11;12;13;105;106;107;108;109;125;126;127;128;210;211;212;213;214;215;216;217;218;219;220;401;402;526;697;698;699;700;701;702;703;777;778;779;780;781;782;783;784;785;786;899;900;901;902;903;932;933;934;935;936;1067;1068;1069;1082;1083;1084;1085;1086;1087;1091;1092;1093;1094;1095;1096;1097;1098;1342;1343;1344;1345;1346;1558;1559;1560;1561;1608;1609;1610;1611;1612;1613;1614;1633;1634;1635;1…	0;8;9;10;11;12;13;14;15;16;17;18;121;122;123;124;125;141;142;143;144;233;234;235;236;237;238;239;240;241;242;243;244;245;246;439;440;577;761;762;763;764;765;766;767;768;769;770;853;854;855;856;857;858;859;860;861;862;863;864;865;866;867;984;985;986;987;988;989;1019;1020;1021;1022;1023;1170;1171;1172;1185;1186;1187;1188;1189;1190;1194;1195;1196;1197;1198;1199;1200;1201;1202;1203;1204;1464;1465;146…	0;9;13;121;123;144;234;236;241;440;577;763;768;862;867;984;988;1019;1023;1170;1171;1185;1188;1200;1203;1464;1465;1688;1742;1743;1770;1801;1922;1923;2324;2333;2395;2590;2592;2729;2958;2959;3322;3327;4000;4172;4212;4214;4336;4338;4533;4613;4668;4798;4801;4803;5083;5093;5381;5393;5401;5418;5734;5825;5827;6089;6171	30;31;32	122;274;465
Q8K585;D3ZAX1	Q8K585	13;2	13;2	3;0	High mobility group protein HMG-I/HMG-Y	Hmga1	sp|Q8K585|HMGA1_RAT High mobility group protein HMG-I/HMG-Y OS=Rattus norvegicus OX=10116 GN=Hmga1 PE=1 SV=3	2	13	13	3	13	13	13	13	3	3	76.6	76.6	23.4	11.706	107	107;91	0	323.31	76.6	76.6	34511000000	15320000000	19191000000	16650000000	13089000000	36	44	80				337	476;477;1116;1150;1151;1191;1671;1877;1878;2124;2125;2306;2507	True;True;True;True;True;True;True;True;True;True;True;True;True	488;489;1134;1168;1169;1209;1698;1905;1906;2159;2160;2345;2548	1020;1021;1022;1023;2366;2367;2368;2369;2460;2461;2462;2463;2464;2465;2466;2467;2468;2469;2470;2471;2472;2555;2556;3548;3549;4013;4014;4015;4016;4017;4018;4019;4020;4577;4578;4579;4580;4581;4582;4583;4584;4585;4586;4587;4973;4974;4975;4976;5476;5477;5478;5479;5480;5481	1118;1119;1120;1121;1122;1123;2531;2532;2533;2534;2650;2651;2652;2653;2654;2655;2656;2657;2658;2659;2660;2661;2662;2663;2664;2665;2666;2667;2668;2669;2670;2671;2672;2673;2759;2760;3828;3829;4358;4359;4360;4361;4362;4363;4364;4365;4967;4968;4969;4970;4971;4972;4973;4974;4975;4976;4977;4978;4979;4980;4981;4982;4983;4984;4985;4986;4987;4988;5423;5424;5425;5426;5977;5978;5979;5980;5981;5982;5983;5984	1118;1123;2532;2654;2661;2759;3829;4358;4361;4975;4977;5426;5979
P60825	P60825	18	18	18	Cold-inducible RNA-binding protein	Cirbp	sp|P60825|CIRBP_RAT Cold-inducible RNA-binding protein OS=Rattus norvegicus OX=10116 GN=Cirbp PE=2 SV=1	1	18	18	18	18	15	18	15	18	15	68	68	68	18.607	172	172	0	293.28	68	61	18704000000	12201000000	6502500000	11193000000	5884100000	28	26	54				264	307;308;368;651;652;670;821;1637;1638;1927;2067;2084;2085;2104;2158;2565;2566;2567	True;True;True;True;True;True;True;True;True;True;True;True;True;True;True;True;True;True	315;316;378;665;666;667;685;837;1664;1665;1959;2100;2118;2119;2120;2139;2194;2608;2609;2610	666;667;668;813;814;1382;1383;1384;1385;1386;1387;1426;1427;1745;1746;1747;1748;3479;3480;3481;3482;3483;3484;3485;4140;4141;4142;4143;4440;4441;4479;4480;4481;4482;4483;4484;4533;4534;4646;5600;5601;5602;5603;5604;5605;5606;5607;5608;5609;5610;5611	730;731;732;894;895;1506;1507;1508;1509;1510;1511;1551;1552;1882;1883;1884;1885;3758;3759;3760;3761;3762;3763;3764;4501;4502;4503;4504;4505;4506;4815;4816;4817;4818;4856;4857;4858;4859;4860;4861;4918;4919;4920;5049;6109;6110;6111;6112;6113;6114;6115;6116;6117;6118;6119;6120	731;732;895;1506;1508;1551;1884;3758;3762;4505;4815;4858;4860;4920;5049;6109;6114;6117	26;27	65;67
Q9QX80;Q9QX81	Q9QX80;Q9QX81	49;46	49;46	47;44	CArG-binding factor A	Hnrnpab	tr|Q9QX80|Q9QX80_RAT CArG-binding factor A OS=Rattus norvegicus OX=10116 GN=Hnrnpab PE=1 SV=1;tr|Q9QX81|Q9QX81_RAT Heterogeneous nuclear ribonucleoprotein A/B OS=Rattus norvegicus OX=10116 GN=Hnrnpab PE=1 SV=1	2	49	49	47	49	34	49	34	47	32	74.4	74.4	74.4	30.853	285	285;332	0	323.31	74.4	62.1	18358000000	13958000000	4400800000	13377000000	3873000000	82	53	135				347	164;275;276;336;365;366;382;383;437;515;516;517;536;537;538;559;560;561;644;645;646;662;663;678;756;757;916;917;991;1058;1063;1064;1102;1232;1233;1394;1395;1396;1490;1560;1727;1728;2081;2373;2374;2419;2436;2437;2438	True;True;True;True;True;True;True;True;True;True;True;True;True;True;True;True;True;True;True;True;True;True;True;True;True;True;True;True;True;True;True;True;True;True;True;True;True;True;True;True;True;True;True;True;True;True;True;True;True	169;283;284;345;375;376;393;394;449;527;528;529;548;549;550;551;572;573;574;657;658;659;677;678;693;771;772;933;934;1009;1076;1081;1082;1120;1251;1252;1414;1415;1416;1515;1586;1754;1755;2114;2412;2413;2458;2476;2477;2478	368;369;370;594;595;596;730;731;802;803;804;805;806;807;808;809;810;835;836;837;954;955;1099;1100;1101;1102;1103;1104;1105;1106;1137;1138;1139;1140;1141;1142;1143;1144;1145;1184;1185;1186;1187;1188;1189;1190;1191;1192;1193;1194;1195;1365;1366;1367;1368;1369;1407;1408;1409;1410;1411;1412;1413;1414;1441;1442;1443;1444;1592;1593;1594;1595;1596;1940;1941;1942;1943;1944;2105;2249;2258;2259;2260;2261;2…	405;406;407;647;648;649;797;798;883;884;885;886;887;888;889;890;891;917;918;919;1050;1051;1205;1206;1207;1208;1209;1210;1211;1212;1243;1244;1245;1246;1247;1248;1249;1250;1251;1290;1291;1292;1293;1294;1295;1296;1297;1298;1299;1300;1301;1487;1488;1489;1490;1491;1532;1533;1534;1535;1536;1537;1538;1539;1566;1567;1568;1569;1719;1720;1721;1722;1723;2080;2081;2082;2083;2084;2085;2258;2414;2423;2424;2425…	406;648;649;797;884;888;918;919;1050;1205;1209;1212;1243;1248;1251;1291;1294;1299;1487;1488;1490;1532;1539;1567;1720;1723;2080;2084;2258;2414;2424;2426;2504;2846;2848;3228;3230;3233;3435;3596;3978;3981;4847;5605;5608;5773;5813;5814;5820	40	108
A0A0G2K654;P06349	A0A0G2K654	23;4	23;4	5;0	Histone cluster 1 H1 family member c	Hist1h1c	tr|A0A0G2K654|A0A0G2K654_RAT Histone cluster 1 H1 family member c OS=Rattus norvegicus OX=10116 GN=Hist1h1c PE=1 SV=1	2	23	23	5	22	20	22	20	5	5	52.8	52.8	18.9	21.316	212	212;208	0	323.31	52.8	50	16740000000	8901600000	7838700000	8310000000	6484000000	39	38	77				54	18;133;134;209;210;491;492;703;704;705;803;804;1037;1038;1045;1136;1741;1879;1880;1881;1948;1949;2026	True;True;True;True;True;True;True;True;True;True;True;True;True;True;True;True;True;True;True;True;True;True;True	18;137;138;216;217;503;504;718;719;720;819;820;1055;1056;1063;1154;1768;1907;1908;1909;1910;1980;1981;2059	46;47;292;293;294;295;296;297;465;466;467;1049;1050;1051;1052;1053;1054;1055;1491;1492;1493;1494;1495;1496;1696;1697;1698;1699;1700;1701;1702;1703;2191;2192;2193;2194;2195;2196;2197;2198;2199;2200;2219;2416;2417;3701;3702;3703;3704;3705;4021;4022;4023;4024;4025;4026;4027;4028;4029;4030;4031;4032;4188;4189;4190;4361;4362;4363	62;63;319;320;321;322;323;324;510;511;512;513;1152;1153;1154;1155;1156;1157;1158;1618;1619;1620;1621;1622;1623;1830;1831;1832;1833;1834;1835;1836;1837;2352;2353;2354;2355;2356;2357;2358;2359;2360;2361;2380;2381;2582;2583;4004;4005;4006;4007;4008;4009;4010;4366;4367;4368;4369;4370;4371;4372;4373;4374;4375;4376;4377;4378;4379;4380;4381;4382;4554;4555;4556;4732;4733;4734	62;320;324;511;513;1152;1156;1618;1620;1623;1833;1835;2354;2359;2381;2582;4006;4369;4376;4380;4555;4556;4734
Q3ZAV2;P62961;D3ZEV0;D4A3P0	Q3ZAV2;P62961;D3ZEV0	35;34;23;6	35;34;23;6	24;23;20;0	Nuclease-sensitive element-binding protein 1	Ybx1;LOC100912427	tr|Q3ZAV2|Q3ZAV2_RAT Nuclease-sensitive element-binding protein 1 OS=Rattus norvegicus OX=10116 GN=Ybx1 PE=1 SV=1;sp|P62961|YBOX1_RAT Nuclease-sensitive element-binding protein 1 OS=Rattus norvegicus OX=10116 GN=Ybx1 PE=2 SV=3;tr|D3ZEV0|D3ZEV0_RAT Nuclease	4	35	35	24	35	27	35	27	24	16	80.7	80.7	68.4	36.2	326	326;322;322;359	0	323.31	80.7	75.5	13057000000	7983100000	5073800000	7330300000	4139000000	94	62	156				294	10;405;406;413;414;504;583;618;619;620;1488;1489;1491;1492;1508;1509;1510;1548;1666;1720;1776;1777;1783;2096;2097;2098;2160;2162;2163;2164;2446;2539;2540;2596;2597	True;True;True;True;True;True;True;True;True;True;True;True;True;True;True;True;True;True;True;True;True;True;True;True;True;True;True;True;True;True;True;True;True;True;True	10;416;417;424;425;516;596;631;632;633;1513;1514;1516;1517;1534;1535;1536;1574;1693;1747;1803;1804;1805;1811;2131;2132;2133;2196;2198;2199;2200;2486;2582;2583;2640;2641	20;21;22;23;875;876;877;878;879;880;893;894;895;896;897;898;1077;1235;1308;1309;1310;1311;1312;1313;1314;1315;3156;3157;3158;3159;3160;3161;3162;3163;3164;3165;3166;3167;3169;3170;3171;3201;3202;3203;3204;3205;3206;3207;3208;3209;3210;3211;3301;3302;3540;3652;3653;3654;3655;3656;3657;3658;3659;3660;3779;3780;3781;3782;3783;3784;3785;3786;3787;3795;3796;3797;3798;3799;3800;3801;4515;4516;4517;4518…	27;28;29;30;31;32;33;34;35;36;37;38;957;958;959;960;961;962;963;964;965;978;979;980;981;982;983;1180;1341;1418;1419;1420;1421;1422;1423;1424;1425;1426;1427;3423;3424;3425;3426;3427;3428;3429;3430;3431;3432;3433;3434;3436;3437;3438;3468;3469;3470;3471;3472;3473;3474;3475;3476;3477;3478;3572;3573;3819;3938;3939;3940;3941;3942;3943;3944;3945;3946;3947;3948;3949;3950;3951;3952;3953;3954;3955;3956;395…	28;957;964;978;981;1180;1341;1423;1424;1426;3425;3432;3437;3438;3469;3473;3478;3572;3819;3954;4092;4096;4116;4896;4899;4905;5051;5060;5063;5065;5849;6046;6050;6193;6195	34	216
Q9JJ54-3;Q9JJ54;Q9JJ54-4;Q9JJ54-2	Q9JJ54-3;Q9JJ54;Q9JJ54-4;Q9JJ54-2	35;34;33;32	35;34;33;32	34;33;32;31	Heterogeneous nuclear ribonucleoprotein D0	Hnrnpd	sp|Q9JJ54-3|HNRPD_RAT Isoform 3 of Heterogeneous nuclear ribonucleoprotein D0 OS=Rattus norvegicus OX=10116 GN=Hnrnpd;sp|Q9JJ54|HNRPD_RAT Heterogeneous nuclear ribonucleoprotein D0 OS=Rattus norvegicus OX=10116 GN=Hnrnpd PE=1 SV=2;sp|Q9JJ54-4|HNRPD_RAT Iso	4	35	35	34	33	29	33	29	32	29	74	74	74	32.672	304	304;353;285;334	0	323.31	74	70.4	11342000000	6526600000	4815400000	6487700000	3667700000	58	47	105				346	165;274;335;484;494;495;519;535;638;639;640;648;649;667;882;904;918;919;972;990;1200;1201;1234;1302;1303;1392;1393;1724;1729;2083;2367;2459;2569;2570;2571	True;True;True;True;True;True;True;True;True;True;True;True;True;True;True;True;True;True;True;True;True;True;True;True;True;True;True;True;True;True;True;True;True;True;True	170;282;344;496;506;507;531;547;651;652;653;662;663;682;899;921;935;936;990;1008;1218;1219;1253;1321;1322;1412;1413;1751;1756;2117;2406;2499;2612;2613;2614	371;372;590;591;592;593;728;729;1035;1057;1058;1059;1060;1061;1062;1063;1064;1111;1134;1135;1136;1349;1350;1351;1352;1353;1354;1355;1356;1357;1358;1376;1377;1378;1379;1421;1422;1869;1870;1871;1872;1915;1916;1917;1918;1919;1920;1945;1946;1947;1948;1949;1950;1951;1952;2068;2069;2070;2071;2104;2573;2574;2575;2576;2577;2578;2579;2580;2642;2763;2764;2765;2766;2767;2971;2972;2973;2974;2975;2976;2977;36…	408;409;643;644;645;646;795;796;1135;1160;1161;1162;1163;1164;1165;1166;1167;1217;1240;1241;1242;1471;1472;1473;1474;1475;1476;1477;1478;1479;1480;1500;1501;1502;1503;1546;1547;2009;2010;2011;2012;2055;2056;2057;2058;2059;2060;2086;2087;2088;2089;2090;2091;2092;2093;2094;2095;2214;2215;2216;2217;2257;2778;2779;2780;2781;2782;2783;2784;2785;2849;2971;2972;2973;2974;2975;3221;3222;3223;3224;3225;32…	408;645;795;1135;1161;1164;1217;1242;1471;1473;1480;1500;1502;1546;2012;2057;2087;2095;2215;2257;2778;2784;2849;2972;2974;3224;3225;3969;3983;4854;5591;5873;6125;6128;6133
D4A543;B7SZV3;Q9ERV8;P36394	D4A543	23;10;1;1	23;10;1;1	23;10;1;1		Sox2	tr|D4A543|D4A543_RAT RCG41622 OS=Rattus norvegicus OX=10116 GN=Sox2 PE=4 SV=1	4	23	23	23	22	21	22	21	22	21	48	48	48	34.406	319	319;240;169;121	0	323.31	46.4	47.3	9859200000	3854100000	6005100000	4014500000	4261500000	46	50	96				165	146;329;436;1057;1125;1249;1293;1294;1313;1374;1375;1410;1411;1412;1473;1474;1746;1755;1770;1771;1773;2254;2428	True;True;True;True;True;True;True;True;True;True;True;True;True;True;True;True;True;True;True;True;True;True;True	150;151;337;338;448;1075;1143;1268;1312;1313;1332;1393;1394;1395;1430;1431;1432;1497;1498;1499;1773;1782;1797;1798;1800;2291;2467;2468	317;318;319;320;706;707;708;709;710;711;712;713;714;951;952;953;2248;2386;2387;2388;2666;2667;2742;2743;2744;2745;2746;2747;2748;2749;2782;2919;2920;2921;2922;2923;2924;2925;2926;2927;2928;2929;2930;2931;2932;2933;2934;2935;2936;2937;2938;3007;3008;3009;3010;3011;3012;3013;3014;3120;3121;3122;3123;3124;3125;3126;3127;3716;3717;3718;3735;3736;3762;3763;3764;3765;3766;3767;3770;3771;3772;3773;4852;…	344;345;346;347;773;774;775;776;777;778;779;780;781;1047;1048;1049;2413;2552;2553;2554;2873;2874;2949;2950;2951;2952;2953;2954;2955;2956;2992;3166;3167;3168;3169;3170;3171;3172;3173;3174;3175;3176;3177;3178;3179;3180;3181;3182;3183;3184;3185;3258;3259;3260;3261;3262;3263;3264;3265;3377;3378;3379;3380;3381;3382;3383;3384;3385;3386;3387;3388;3389;3390;4024;4025;4026;4044;4045;4071;4072;4073;4074;40…	344;774;1049;2413;2553;2873;2950;2956;2992;3170;3178;3259;3263;3264;3387;3390;4026;4044;4072;4074;4083;5286;5793	14;15;16;17;18;19;20	1;4;47;61;68;104;141
Q566D6;F1SW39;Q812D1-2;Q812D1;F1LPC7;A0A0G2JYC7;Q8VHK7;Q925G1-2;Q925G1	Q566D6;F1SW39;Q812D1-2;Q812D1	33;32;30;29;2;2;2;2;2	33;32;30;29;2;2;2;2;2	31;30;28;27;0;0;0;0;0	PC4 and SFRS1-interacting protein	Psip1	tr|Q566D6|Q566D6_RAT PC4 and SFRS1-interacting protein OS=Rattus norvegicus OX=10116 GN=Psip1 PE=1 SV=1;tr|F1SW39|F1SW39_RAT PC4 and SFRS1 interacting protein 1 OS=Rattus norvegicus OX=10116 GN=Psip1 PE=1 SV=1;sp|Q812D1-2|PSIP1_RAT Isoform 2 of PC4 and SFR	9	33	33	31	31	26	31	26	30	24	61.3	61.3	58.3	37.365	331	331;528;331;528;237;651;237;668;669	0	323.31	61.3	57.1	8805400000	4320200000	4485300000	4245300000	3311000000	55	50	105				304	9;52;215;314;322;508;593;655;656;684;685;774;822;1031;1075;1076;1141;1421;1501;1546;1547;1668;1689;1690;1694;1695;1696;1732;1744;2303;2422;2517;2518	True;True;True;True;True;True;True;True;True;True;True;True;True;True;True;True;True;True;True;True;True;True;True;True;True;True;True;True;True;True;True;True;True	9;54;223;322;330;520;606;670;671;699;700;790;838;1049;1093;1094;1159;1441;1526;1572;1573;1695;1716;1717;1721;1722;1723;1759;1771;2341;2342;2461;2558;2559;2560;2561	18;19;117;478;479;679;680;681;690;691;1081;1252;1253;1391;1392;1393;1394;1395;1396;1397;1455;1456;1640;1641;1749;2175;2176;2177;2178;2284;2285;2286;2287;2288;2289;2290;2291;2292;2430;2431;2432;2433;3024;3025;3026;3027;3186;3187;3291;3292;3293;3294;3295;3296;3297;3298;3299;3300;3545;3577;3578;3579;3587;3588;3589;3590;3591;3592;3593;3684;3685;3713;3714;4959;4960;4961;4962;4963;4964;4965;4966;5283;5…	23;24;25;26;133;524;525;743;744;745;754;755;1184;1358;1359;1515;1516;1517;1518;1519;1520;1521;1522;1580;1581;1774;1775;1886;2336;2337;2338;2339;2449;2450;2451;2452;2453;2454;2455;2456;2457;2599;2600;2601;2602;3275;3276;3277;3278;3453;3454;3562;3563;3564;3565;3566;3567;3568;3569;3570;3571;3825;3859;3860;3861;3869;3870;3871;3872;3873;3874;3875;3987;3988;4021;4022;5406;5407;5408;5409;5410;5411;5412;…	24;133;525;744;754;1184;1359;1517;1519;1580;1581;1775;1886;2337;2449;2455;2599;3275;3453;3562;3568;3825;3859;3860;3869;3873;3875;3988;4021;5416;5777;6008;6013	36	209
D3ZBN0	D3ZBN0	22	20	16	Histone H1.5	Hist1h1b	sp|D3ZBN0|H15_RAT Histone H1.5 OS=Rattus norvegicus OX=10116 GN=Hist1h1b PE=1 SV=1	1	22	20	16	21	21	19	19	16	15	52.3	50.5	41	22.649	222	222	0	217.49	52.3	48.2	8677700000	3490700000	5187000000	3729800000	3602400000	38	37	75				120	122;123;135;136;229;486;691;692;803;804;806;807;1039;1040;1046;1742;1888;1889;1890;2027;2028;2056	True;True;True;True;True;True;True;True;False;False;True;True;True;True;True;True;True;True;True;True;True;True	126;127;139;140;237;498;706;707;819;820;822;823;1057;1058;1064;1769;1918;1919;1920;1921;1922;2060;2061;2089	271;272;273;274;298;299;300;301;302;303;503;504;1038;1039;1040;1041;1466;1467;1468;1469;1470;1696;1697;1698;1699;1700;1701;1702;1703;1705;1706;1707;1708;1709;2201;2202;2203;2204;2205;2206;2207;2208;2209;2210;2220;2221;2222;2223;2224;3706;3707;3708;3709;3710;4052;4053;4054;4055;4056;4057;4058;4059;4060;4061;4062;4063;4064;4364;4365;4366;4418	298;299;300;301;325;326;327;328;329;330;549;550;551;552;553;554;1138;1139;1140;1141;1591;1592;1593;1594;1595;1596;1597;1830;1831;1832;1833;1834;1835;1836;1837;1839;1840;1841;1842;1843;2362;2363;2364;2365;2366;2367;2368;2369;2370;2371;2382;2383;2384;2385;2386;2387;2388;2389;4011;4012;4013;4014;4015;4016;4017;4018;4402;4403;4404;4405;4406;4407;4408;4409;4410;4411;4412;4413;4414;4415;4416;4735;4736;…	299;301;325;328;550;1141;1594;1597;1833;1835;1840;1843;2363;2366;2387;4012;4404;4413;4415;4735;4736;4792
Q6IMY8;A0A0G2JZ52	Q6IMY8;A0A0G2JZ52	54;53	54;53	54;53		Hnrnpu	sp|Q6IMY8|HNRPU_RAT Heterogeneous nuclear ribonucleoprotein U OS=Rattus norvegicus OX=10116 GN=Hnrnpu PE=1 SV=1;tr|A0A0G2JZ52|A0A0G2JZ52_RAT Heterogeneous nuclear ribonucleoprotein U OS=Rattus norvegicus OX=10116 GN=Hnrnpu PE=1 SV=1	2	54	54	54	43	53	43	53	43	53	48.2	48.2	48.2	87.731	798	798;803	0	323.31	40	48.2	8279700000	2449500000	5830200000	2340000000	4498700000	60	77	137				328	60;181;182;224;253;254;311;321;340;407;447;448;562;563;726;734;760;818;823;864;986;1033;1043;1052;1053;1126;1127;1155;1278;1283;1284;1304;1305;1326;1327;1377;1439;1440;1499;1500;1507;1558;1629;1659;1660;1930;2108;2128;2129;2130;2490;2491;2497;2498	True;True;True;True;True;True;True;True;True;True;True;True;True;True;True;True;True;True;True;True;True;True;True;True;True;True;True;True;True;True;True;True;True;True;True;True;True;True;True;True;True;True;True;True;True;True;True;True;True;True;True;True;True;True	62;187;188;232;261;262;319;329;349;418;459;460;575;576;741;749;775;834;839;840;881;1004;1051;1061;1070;1071;1144;1145;1173;1297;1302;1303;1323;1324;1345;1346;1397;1459;1460;1524;1525;1533;1584;1656;1686;1687;1962;2143;2163;2164;2165;2530;2531;2537;2538	131;132;133;134;135;410;411;412;413;414;494;495;547;548;549;550;551;552;553;554;555;675;688;689;738;739;881;882;883;884;885;886;972;973;1196;1197;1198;1199;1538;1539;1552;1553;1602;1603;1604;1605;1738;1739;1740;1750;1751;1752;1753;1754;1755;1756;1841;2098;2180;2181;2182;2183;2184;2185;2186;2215;2216;2238;2239;2240;2389;2390;2391;2392;2393;2394;2481;2482;2714;2715;2723;2724;2725;2726;2727;2728;272…	147;148;149;150;151;455;456;457;458;459;540;541;599;600;601;602;603;604;605;606;607;739;752;753;805;806;966;967;968;969;970;971;1070;1071;1302;1303;1304;1305;1665;1666;1679;1680;1729;1730;1731;1732;1733;1875;1876;1877;1887;1888;1889;1890;1891;1892;1893;1981;2251;2341;2342;2343;2344;2345;2346;2347;2376;2377;2403;2404;2405;2555;2556;2557;2558;2559;2560;2682;2683;2921;2922;2930;2931;2932;2933;2934;2…	151;455;459;541;601;607;739;752;806;967;1070;1071;1302;1305;1666;1679;1732;1876;1892;1981;2251;2347;2377;2403;2405;2557;2560;2682;2921;2931;2937;2976;2978;3024;3026;3192;3311;3312;3449;3451;3467;3589;3739;3810;3811;4511;4931;4993;4994;4997;5941;5944;5958;5960	38	508
A0A0G2K0R4;A0A0G2KAJ3	A0A0G2K0R4;A0A0G2KAJ3	29;29	23;23	22;22			tr|A0A0G2K0R4|A0A0G2K0R4_RAT MYC-associated zinc finger protein OS=Rattus norvegicus OX=10116 GN=Maz PE=4 SV=1;tr|A0A0G2KAJ3|A0A0G2KAJ3_RAT MYC-associated zinc finger protein OS=Rattus norvegicus OX=10116 GN=Maz PE=4 SV=1	2	29	23	22	25	28	20	23	19	22	40.4	38.3	36.6	48.33	473	473;475	0	253.2	40	40.4	7251500000	1578800000	5672700000	1987400000	3866400000	33	45	78				32	70;71;96;110;271;272;273;357;379;380;419;420;831;832;854;992;1131;1334;1433;1511;1512;1700;1701;1735;1908;1952;1984;2253;2418	False;False;True;True;True;True;True;True;False;False;True;True;True;True;True;True;False;True;True;True;False;True;True;True;True;True;True;True;True	72;73;98;113;279;280;281;367;390;391;430;431;848;849;871;1010;1149;1353;1453;1537;1538;1727;1728;1762;1940;1984;2017;2290;2457	157;158;159;160;161;208;209;243;244;245;246;247;248;583;584;585;586;587;588;589;787;788;789;830;831;832;909;910;911;912;913;914;1777;1778;1779;1780;1823;1824;1825;1826;1827;1828;2106;2107;2108;2399;2400;2401;2402;2824;2825;2826;3051;3052;3212;3213;3214;3215;3600;3601;3602;3603;3604;3605;3606;3607;3608;3689;3690;3691;4102;4103;4104;4105;4195;4196;4197;4198;4199;4200;4201;4202;4273;4274;4275;4276;4…	173;174;175;176;177;230;231;232;270;271;272;273;274;275;636;637;638;639;640;641;642;868;869;870;911;912;913;995;996;997;998;999;1000;1916;1917;1918;1919;1963;1964;1965;1966;1967;1968;2259;2260;2261;2565;2566;2567;2568;3036;3037;3038;3302;3303;3479;3480;3481;3482;3882;3883;3884;3885;3886;3887;3888;3889;3890;3992;3993;3994;4462;4463;4464;4465;4466;4561;4562;4563;4564;4565;4566;4567;4568;4644;4645;4…	176;177;231;273;636;638;641;869;912;913;997;999;1917;1919;1964;2259;2568;3036;3303;3479;3482;3884;3890;3992;4466;4567;4644;5285;5769
P62864;Q5BJN7;D3ZGS7	P62864;Q5BJN7;D3ZGS7	7;6;4	7;6;4	7;6;4	40S ribosomal protein S30	Fau;LOC100360647;RGD1565317	sp|P62864|RS30_RAT 40S ribosomal protein S30 OS=Rattus norvegicus OX=10116 GN=Fau PE=1 SV=1;tr|Q5BJN7|Q5BJN7_RAT 40S ribosomal protein S30 OS=Rattus norvegicus OX=10116 GN=LOC100360647 PE=1 SV=1;tr|D3ZGS7|D3ZGS7_RAT 40S ribosomal protein S30 OS=Rattus norv	3	7	7	7	4	7	4	7	4	7	59.3	59.3	59.3	6.6478	59	59;133;130	0	44.452	50.8	59.3	5413600000	2422900000	2990700000	2984800000	1678700000	6	9	15				276	85;607;608;768;1186;2416;2479	True;True;True;True;True;True;True	87;620;621;784;1204;2455;2519	188;1280;1281;1282;1283;1284;1285;1624;1625;1626;1627;2545;2546;5272;5273;5419	208;1386;1387;1388;1389;1390;1391;1754;1755;1756;1757;2749;2750;5766;5767;5920	208;1386;1391;1754;2750;5767;5920
F1MAQ5;A0A0U1RRX4;F1LNK0;P15146-2;P15146;P15146-3;Q78DZ1;P15146-4;A0A0U1RRQ0	F1MAQ5;A0A0U1RRX4;F1LNK0;P15146-2;P15146;P15146-3;Q78DZ1;P15146-4;A0A0U1RRQ0	44;44;42;42;40;30;28;28;22	44;44;42;42;40;30;28;28;22	44;44;42;42;40;30;28;28;22	Microtubule-associated protein;Microtubule-associated protein 2	Map2	tr|F1MAQ5|F1MAQ5_RAT Microtubule-associated protein OS=Rattus norvegicus OX=10116 GN=Map2 PE=1 SV=3;tr|A0A0U1RRX4|A0A0U1RRX4_RAT Microtubule-associated protein OS=Rattus norvegicus OX=10116 GN=Map2 PE=1 SV=1;tr|F1LNK0|F1LNK0_RAT Microtubule-associated prot	9	44	44	44	41	37	41	37	41	37	18.4	18.4	18.4	198.46	1825	1825;1829;1942;1830;1861;467;498;498;336	0	323.31	17.7	15.6	5252000000	2664500000	2587500000	2577600000	2036800000	59	50	109				82	84;204;255;287;682;683;813;814;907;908;928;1006;1096;1122;1161;1176;1177;1219;1267;1268;1301;1556;1749;1928;1929;1947;1987;1988;2118;2119;2255;2284;2285;2287;2327;2328;2334;2387;2411;2412;2413;2424;2492;2614	True;True;True;True;True;True;True;True;True;True;True;True;True;True;True;True;True;True;True;True;True;True;True;True;True;True;True;True;True;True;True;True;True;True;True;True;True;True;True;True;True;True;True;True	86;211;263;295;697;698;829;830;924;925;945;1024;1114;1140;1179;1194;1195;1238;1286;1287;1320;1582;1776;1960;1961;1979;2020;2021;2153;2154;2292;2322;2323;2325;2366;2367;2373;2426;2450;2451;2452;2463;2532;2658	186;187;455;456;457;458;556;557;618;1450;1451;1452;1453;1454;1723;1724;1725;1726;1924;1925;1926;1927;1928;1968;1969;1970;1971;2129;2324;2325;2326;2327;2380;2501;2530;2531;2532;2533;2618;2619;2694;2695;2696;2697;2698;2761;2762;3315;3316;3723;4144;4145;4146;4147;4184;4185;4186;4187;4281;4282;4283;4284;4285;4286;4564;4565;4566;4854;4911;4912;4913;4914;4915;4916;4921;5014;5015;5016;5017;5018;5032;503…	205;206;207;500;501;502;503;608;609;671;1575;1576;1577;1578;1579;1857;1858;1859;1860;2064;2065;2066;2067;2068;2111;2112;2113;2114;2283;2489;2490;2491;2492;2546;2705;2734;2735;2736;2737;2825;2826;2901;2902;2903;2904;2905;2969;2970;3586;3587;4031;4507;4508;4509;4510;4548;4549;4550;4551;4552;4553;4652;4653;4654;4655;4656;4657;4953;4954;4955;4956;5288;5345;5346;5347;5348;5349;5350;5351;5360;5467;5468…	206;502;608;671;1575;1579;1857;1859;2065;2066;2114;2283;2490;2546;2705;2736;2737;2826;2902;2903;2969;3587;4031;4507;4510;4553;4653;4654;4955;4956;5288;5346;5351;5360;5468;5470;5486;5684;5756;5758;5761;5782;5949;6240
A0A0H2UI11;P62893;Q3ZB89	A0A0H2UI11;P62893	6;6;1	6;6;1	6;6;1	60S ribosomal protein L39	Rpl39	tr|A0A0H2UI11|A0A0H2UI11_RAT 60S ribosomal protein L39 OS=Rattus norvegicus OX=10116 GN=Rpl39 PE=1 SV=1;sp|P62893|RL39_RAT 60S ribosomal protein L39 OS=Rattus norvegicus OX=10116 GN=Rpl39 PE=1 SV=2	3	6	6	6	5	5	5	5	5	5	72	72	72	6.2754	50	50;51;51	0	60.133	72	62	4862200000	2455800000	2406400000	2716300000	1478700000	8	9	17				80	571;1425;1646;1667;2111;2216	True;True;True;True;True;True	584;1445;1673;1694;2146;2253	1217;3035;3036;3037;3502;3503;3541;3542;3543;3544;4553;4554;4767;4768;4769;4770	1323;3286;3287;3288;3781;3782;3820;3821;3822;3823;3824;4942;4943;5200;5201;5202;5203	1323;3287;3782;3822;4942;5203
G3V6P6;Q925G0-2;Q5PPI5	G3V6P6;Q925G0-2	11;8;2	11;8;2	3;0;2	RNA-binding protein 3	Rbm3	tr|G3V6P6|G3V6P6_RAT RNA binding motif protein 3, isoform CRA_a OS=Rattus norvegicus OX=10116 GN=Rbm3 PE=1 SV=1;sp|Q925G0-2|RBM3_RAT Isoform 2 of RNA-binding protein 3 OS=Rattus norvegicus OX=10116 GN=Rbm3	3	11	11	3	11	10	11	10	3	3	53.2	53.2	25	16.983	156	156;156;148	0	170.88	53.2	46.2	4582400000	2749000000	1833500000	2639700000	1479400000	18	21	39				210	168;169;170;647;669;1593;1636;2068;2082;2553;2610	True;True;True;True;True;True;True;True;True;True;True	173;174;175;660;661;684;1620;1663;2101;2115;2116;2596;2654	376;377;378;379;380;381;382;383;384;385;1370;1371;1372;1373;1374;1375;1425;3389;3390;3477;3478;4442;4443;4444;4445;4471;4472;4473;4474;4475;4476;5575;5576;5577;5578;5714;5715	413;414;415;416;417;418;419;420;421;422;1492;1493;1494;1495;1496;1497;1498;1499;1550;3664;3665;3756;3757;4819;4820;4821;4822;4848;4849;4850;4851;4852;4853;6082;6083;6084;6085;6225;6226	415;418;421;1498;1550;3664;3756;4819;4848;6082;6226	21	64
Q91ZW1	Q91ZW1	37	37	37	Transcription factor A, mitochondrial	Tfam	sp|Q91ZW1|TFAM_RAT Transcription factor A, mitochondrial OS=Rattus norvegicus OX=10116 GN=Tfam PE=2 SV=1	1	37	37	37	28	36	28	36	28	36	73	73	73	28.186	244	244	0	323.31	66.8	73	4579000000	1587800000	2991200000	1533300000	2271800000	43	51	94				341	121;313;401;458;461;482;565;595;596;893;996;1139;1276;1361;1362;1540;1541;1611;1612;1613;1774;1834;1835;1836;2165;2170;2171;2172;2489;2525;2526;2528;2529;2548;2549;2583;2584	True;True;True;True;True;True;True;True;True;True;True;True;True;True;True;True;True;True;True;True;True;True;True;True;True;True;True;True;True;True;True;True;True;True;True;True;True	125;321;412;470;473;494;578;608;609;910;1014;1157;1295;1380;1381;1566;1567;1638;1639;1640;1801;1862;1863;1864;2201;2206;2207;2208;2529;2568;2569;2571;2572;2591;2592;2626;2627;2628	268;269;270;677;678;870;989;990;993;994;1031;1032;1204;1256;1257;1258;1259;1891;2112;2113;2114;2115;2427;2428;2711;2712;2894;2895;2896;2897;2898;2899;3276;3277;3278;3279;3280;3425;3426;3427;3428;3429;3430;3431;3432;3433;3774;3775;3776;3777;3921;3922;3923;3924;3925;3926;3927;3928;3929;4659;4660;4661;4662;4675;4676;4677;4678;5437;5438;5522;5523;5524;5525;5527;5528;5567;5568;5569;5653;5654;5655;5656…	295;296;297;741;742;952;1087;1088;1091;1092;1131;1132;1310;1362;1363;1364;1365;2031;2265;2266;2267;2268;2596;2597;2918;2919;3140;3141;3142;3143;3144;3145;3546;3547;3548;3549;3550;3702;3703;3704;3705;3706;3707;3708;3709;3710;4084;4085;4086;4087;4088;4089;4265;4266;4267;4268;4269;4270;4271;4272;4273;4274;5066;5067;5068;5069;5070;5071;5072;5073;5074;5075;5076;5077;5078;5079;5101;5102;5103;5104;5938;…	297;742;952;1088;1091;1131;1310;1362;1365;2031;2266;2597;2919;3141;3145;3546;3547;3703;3705;3710;4087;4266;4271;4274;5068;5102;5103;5104;5939;6029;6030;6033;6034;6074;6075;6163;6166	39	126
P61928;D4A7Z2;D3ZTT9;D4A201;D3ZTX8	P61928;D4A7Z2;D3ZTT9	12;9;8;4;4	12;9;8;4;4	12;9;8;4;4	60S ribosomal protein L37;Ribosomal protein L37	Rpl37;LOC100360654	sp|P61928|RL37_RAT 60S ribosomal protein L37 OS=Rattus norvegicus OX=10116 GN=Rpl37 PE=1 SV=2;tr|D4A7Z2|D4A7Z2_RAT Ribosomal protein L37 OS=Rattus norvegicus OX=10116 GN=LOC100360654 PE=3 SV=2;tr|D3ZTT9|D3ZTT9_RAT Ribosomal protein L37, pseudogene 1 OS=Rat	5	12	12	12	11	10	11	10	11	10	66	66	66	11.078	97	97;97;97;93;97	0	95.346	58.8	66	4009000000	2077000000	1932000000	2160700000	1372300000	15	12	27				267	284;289;839;860;1202;1531;1532;1712;1752;2239;2248;2249	True;True;True;True;True;True;True;True;True;True;True;True	292;297;856;877;1220;1557;1558;1739;1779;2276;2285;2286	611;612;613;621;1793;1794;1836;1837;2581;3255;3256;3257;3258;3259;3260;3628;3728;3729;3730;3731;4817;4818;4840;4841;4842;4843	664;665;666;674;1932;1933;1934;1976;1977;2786;3522;3523;3524;3525;3526;3527;3912;4037;4038;4039;4040;5250;5251;5274;5275;5276;5277	664;674;1933;1977;2786;3522;3525;3912;4038;5250;5274;5276
A0A0H2UHP0;Q9R1D1;D3ZQ48	A0A0H2UHP0;Q9R1D1	37;37;3	37;37;3	37;37;3	Transcriptional repressor CTCF	Ctcf	tr|A0A0H2UHP0|A0A0H2UHP0_RAT CCCTC-binding factor, isoform CRA_a OS=Rattus norvegicus OX=10116 GN=Ctcf PE=1 SV=1;sp|Q9R1D1|CTCF_RAT Transcriptional repressor CTCF OS=Rattus norvegicus OX=10116 GN=Ctcf PE=2 SV=1	3	37	37	37	34	36	34	36	34	36	34.8	34.8	34.8	84.008	738	738;737;635	0	323.31	31.7	34.8	3556600000	1374700000	2181900000	1399900000	1619100000	51	54	105				73	270;301;372;553;566;567;603;778;824;825;826;868;1144;1145;1159;1160;1408;1515;1631;1632;1645;1653;1794;1797;1854;1855;1959;1960;2044;2207;2231;2234;2235;2543;2547;2568;2587	True;True;True;True;True;True;True;True;True;True;True;True;True;True;True;True;True;True;True;True;True;True;True;True;True;True;True;True;True;True;True;True;True;True;True;True;True	278;309;382;566;579;580;616;794;841;842;843;885;1162;1163;1177;1178;1428;1541;1658;1659;1672;1680;1822;1825;1882;1883;1991;1992;2077;2243;2268;2271;2272;2586;2590;2611;2631	581;582;656;818;819;1175;1176;1205;1206;1207;1208;1209;1210;1211;1274;1647;1648;1757;1758;1759;1760;1761;1762;1763;1764;1765;1766;1846;1847;2439;2440;2441;2442;2443;2444;2496;2497;2498;2499;2500;3003;3004;3005;3221;3462;3463;3464;3465;3466;3467;3468;3469;3500;3501;3513;3514;3828;3829;3836;3837;3968;3969;3970;3971;4212;4213;4214;4215;4216;4217;4218;4219;4396;4397;4739;4740;4793;4794;4795;4796;4797…	634;635;720;899;900;1281;1282;1311;1312;1313;1314;1315;1316;1317;1380;1781;1782;1894;1895;1896;1897;1898;1899;1900;1901;1902;1903;1904;1905;1986;1987;2608;2609;2610;2611;2612;2613;2700;2701;2702;2703;2704;3254;3255;3256;3488;3741;3742;3743;3744;3745;3746;3747;3748;3779;3780;3792;3793;4154;4155;4162;4163;4313;4314;4315;4316;4578;4579;4580;4581;4582;4583;4584;4585;4768;4769;5167;5168;5169;5226;5227…	635;720;900;1281;1313;1316;1380;1781;1898;1900;1905;1987;2611;2613;2700;2704;3256;3488;3743;3746;3780;3793;4154;4162;4314;4316;4580;4585;4768;5168;5230;5238;5241;6056;6072;6121;6174
Q8K585-2	Q8K585-2	12	2	2	High mobility group protein HMG-I/HMG-Y	Hmga1	sp|Q8K585-2|HMGA1_RAT Isoform HMG-Y of High mobility group protein HMG-I/HMG-Y OS=Rattus norvegicus OX=10116 GN=Hmga1	1	12	2	2	11	12	1	2	1	2	74	14.6	14.6	10.709	96	96	0	25.527	74	74	3508100000	1593000000	1915200000	1606900000	1429400000	10	11	21				338	476;477;1116;1149;1191;1670;1877;1878;2124;2125;2306;2507	False;False;False;True;False;True;False;False;False;False;False;False	488;489;1134;1167;1209;1697;1905;1906;2159;2160;2345;2548	1020;1021;1022;1023;2366;2367;2368;2369;2454;2455;2456;2457;2458;2459;2555;2556;3547;4013;4014;4015;4016;4017;4018;4019;4020;4577;4578;4579;4580;4581;4582;4583;4584;4585;4586;4587;4973;4974;4975;4976;5476;5477;5478;5479;5480;5481	1118;1119;1120;1121;1122;1123;2531;2532;2533;2534;2630;2631;2632;2633;2634;2635;2636;2637;2638;2639;2640;2641;2642;2643;2644;2645;2646;2647;2648;2649;2759;2760;3827;4358;4359;4360;4361;4362;4363;4364;4365;4967;4968;4969;4970;4971;4972;4973;4974;4975;4976;4977;4978;4979;4980;4981;4982;4983;4984;4985;4986;4987;4988;5423;5424;5425;5426;5977;5978;5979;5980;5981;5982;5983;5984	1118;1123;2532;2646;2759;3827;4358;4361;4975;4977;5426;5979
D3ZK97;P84245;M0RBX6;D3ZJ08;Q6LED0;A0A0G2K0N8;A0A0G2K9I5;D3ZCY4;A0A0G2K5X7	D3ZK97;P84245;M0RBX6;D3ZJ08;Q6LED0;A0A0G2K0N8	11;11;10;10;10;9;5;1;1	11;11;10;10;10;9;5;1;1	11;11;10;10;10;9;5;1;1	Histone H3;Histone H3.3;Histone H3.1	H3f3c;H3f3b;Hist1h3e;Hist2h3c2	tr|D3ZK97|D3ZK97_RAT Histone H3 OS=Rattus norvegicus OX=10116 GN=H3f3c PE=3 SV=1;sp|P84245|H33_RAT Histone H3.3 OS=Rattus norvegicus OX=10116 GN=H3f3b PE=1 SV=2;tr|M0RBX6|M0RBX6_RAT Histone H3 OS=Rattus norvegicus OX=10116 GN=LOC690171 PE=1 SV=1;tr|D3ZJ08|	9	11	11	11	11	11	11	11	11	11	44.9	44.9	44.9	15.358	136	136;136;136;136;136;130;136;133;136	0	79.488	44.9	44.9	3263400000	1609400000	1654000000	1615100000	1240700000	12	12	24				138	325;438;1807;1808;1825;2143;2144;2501;2605;2606;2607	True;True;True;True;True;True;True;True;True;True;True	333;450;1835;1836;1853;2178;2179;2541;2649;2650;2651	695;696;956;957;3860;3861;3862;3863;3898;3899;4619;4620;4621;4622;5462;5463;5704;5705;5706;5707;5708;5709;5710	759;760;1052;1053;4189;4190;4191;4192;4231;4232;5020;5021;5022;5023;5024;5025;5963;5964;6215;6216;6217;6218;6219;6220;6221	760;1053;4189;4191;4231;5022;5024;5963;6217;6219;6220
Q62806;Q4V8J3;A0A0G2KAA5;D4AAX1;A0A0G2JYI6;A0A0G2JYU9;D3ZUE7;A0A0G2K008;Q02975	Q62806	35;1;1;1;1;1;1;1;1	35;1;1;1;1;1;1;1;1	33;1;1;1;1;1;1;1;1	Zinc finger protein 148	Znf148	sp|Q62806|ZN148_RAT Zinc finger protein 148 OS=Rattus norvegicus OX=10116 GN=Znf148 PE=1 SV=1	9	35	35	33	24	31	24	31	22	29	42.2	42.2	40.1	88.747	794	794;276;347;427;430;530;540;822;576	0	323.31	33.4	39.5	3218100000	1123200000	2094900000	1089800000	1609900000	32	51	83				319	172;263;264;282;359;478;479;564;577;679;680;884;938;939;971;1153;1376;1442;1618;1669;1703;1704;1705;1793;1932;1962;2010;2011;2017;2105;2106;2232;2275;2594;2595	True;True;True;True;True;True;True;True;True;True;True;True;True;True;True;True;True;True;True;True;True;True;True;True;True;True;True;True;True;True;True;True;True;True;True	177;271;272;290;369;490;491;577;590;694;695;901;955;956;989;1171;1396;1462;1463;1645;1696;1730;1731;1732;1821;1964;1994;2043;2044;2050;2140;2141;2269;2313;2638;2639	387;388;389;571;572;573;606;607;792;793;794;1024;1025;1026;1200;1201;1202;1203;1225;1445;1446;1447;1874;1875;1876;1877;1996;1997;1998;1999;2000;2001;2002;2064;2065;2066;2067;2477;2478;2479;2939;2940;2941;2942;2943;2944;3064;3065;3066;3444;3546;3610;3611;3612;3613;3614;3615;3826;3827;4153;4154;4224;4225;4226;4227;4228;4229;4334;4335;4345;4346;4535;4536;4537;4538;4539;4800;4801;4893;5677;5678;5679;…	424;425;426;623;624;625;626;659;660;873;874;875;1124;1125;1126;1306;1307;1308;1309;1331;1570;1571;1572;2014;2015;2016;2017;2139;2140;2141;2142;2143;2144;2145;2210;2211;2212;2213;2678;2679;2680;3186;3187;3188;3189;3190;3191;3315;3316;3317;3721;3826;3892;3893;3894;3895;3896;3897;4152;4153;4516;4517;4590;4591;4592;4593;4594;4595;4705;4706;4716;4717;4921;4922;4923;4924;4925;5233;5234;5327;6187;6188;6…	425;623;625;660;874;1124;1126;1307;1331;1571;1572;2015;2139;2144;2211;2679;3188;3316;3721;3826;3892;3896;3897;4152;4517;4594;4705;4706;4716;4923;4924;5234;5327;6190;6192	37	1
D4A3K5	D4A3K5	19	14	14	Histone H1.1	Hist1h1a	sp|D4A3K5|H11_RAT Histone H1.1 OS=Rattus norvegicus OX=10116 GN=Hist1h1a PE=1 SV=1	1	19	14	14	18	15	13	11	13	11	53.3	48.1	48.1	22.004	214	214	0	205.09	51.4	50	2777700000	1232700000	1545000000	1223600000	1173400000	19	19	38				163	54;223;491;492;799;800;801;806;1109;1164;1165;1891;1892;1948;1949;1998;1999;2023;2429	True;True;False;False;True;True;True;False;True;True;True;True;True;False;False;True;True;True;True	56;231;503;504;815;816;817;822;1127;1182;1183;1923;1924;1980;1981;2031;2032;2056;2469	119;492;493;1049;1050;1051;1052;1053;1054;1055;1689;1690;1691;1692;1693;1694;1705;1706;2353;2354;2355;2356;2504;2505;2506;2507;4065;4066;4067;4068;4069;4070;4071;4188;4189;4190;4307;4308;4309;4310;4311;4312;4355;4356;4357;4358;5306	135;538;539;1152;1153;1154;1155;1156;1157;1158;1823;1824;1825;1826;1827;1828;1839;1840;2518;2519;2520;2521;2708;2709;2710;2711;4417;4418;4419;4420;4421;4422;4423;4424;4425;4426;4554;4555;4556;4678;4679;4680;4681;4682;4683;4726;4727;4728;4729;5800	135;538;1152;1156;1823;1824;1828;1840;2521;2709;2711;4417;4425;4555;4556;4679;4682;4729;5800
F1M8R0	F1M8R0	30	30	24		Vezf1	tr|F1M8R0|F1M8R0_RAT Vascular endothelial zinc finger 1 OS=Rattus norvegicus OX=10116 GN=Vezf1 PE=1 SV=3	1	30	30	24	7	29	7	29	2	24	44.6	44.6	40.8	56.813	520	520	0	323.31	7.9	44.6	2774900000	496660000	2278300000	499640000	1713900000	8	39	47				199	68;69;70;71;300;358;369;379;380;446;659;853;874;885;1131;1292;1333;1365;1366;1512;1698;1736;1953;2187;2188;2222;2223;2224;2314;2488	True;True;True;True;True;True;True;True;True;True;True;True;True;True;True;True;True;True;True;True;True;True;True;True;True;True;True;True;True;True	70;71;72;73;308;368;379;390;391;458;674;870;891;902;1149;1311;1352;1384;1385;1538;1725;1763;1985;2223;2224;2259;2260;2261;2353;2528	154;155;156;157;158;159;160;161;654;655;790;791;815;830;831;832;969;970;971;1402;1403;1822;1859;1878;1879;2399;2400;2401;2402;2741;2823;2905;2906;2907;3213;3214;3215;3596;3692;4203;4704;4705;4779;4780;4781;4782;4990;4991;5436	170;171;172;173;174;175;176;177;718;719;871;872;896;911;912;913;1067;1068;1069;1527;1528;1962;1999;2018;2019;2565;2566;2567;2568;2948;3035;3152;3153;3154;3480;3481;3482;3878;3995;4569;5131;5132;5212;5213;5214;5215;5440;5441;5937	171;172;176;177;718;871;896;912;913;1068;1528;1962;1999;2018;2568;2948;3035;3152;3154;3482;3878;3995;4569;5131;5132;5213;5214;5215;5441;5937
D3ZG21	D3ZG21	61	61	59		Tcf20	tr|D3ZG21|D3ZG21_RAT Transcription factor 20 OS=Rattus norvegicus OX=10116 GN=Tcf20 PE=1 SV=1	1	61	61	59	48	56	48	56	46	54	34.6	34.6	34.6	214.32	1970	1970	0	323.31	28.1	32.8	2769000000	1106000000	1663000000	1162300000	1197000000	68	83	151				128	101;103;104;297;342;397;471;496;630;735;736;752;776;777;880;911;1009;1010;1062;1087;1152;1236;1279;1289;1307;1581;1582;1584;1609;1610;1633;1639;1662;1663;1678;1679;1733;1787;1826;1829;1900;1925;1936;1937;1969;2000;2033;2062;2075;2086;2107;2131;2132;2134;2145;2252;2343;2544;2545;2546;2613	True;True;True;True;True;True;True;True;True;True;True;True;True;True;True;True;True;True;True;True;True;True;True;True;True;True;True;True;True;True;True;True;True;True;True;True;True;True;True;True;True;True;True;True;True;True;True;True;True;True;True;True;True;True;True;True;True;True;True;True;True	104;106;107;305;351;408;483;508;643;750;751;767;792;793;897;928;1027;1028;1080;1105;1170;1255;1298;1308;1326;1607;1608;1610;1636;1637;1660;1666;1689;1690;1705;1706;1760;1815;1854;1857;1932;1957;1968;1969;2001;2033;2066;2095;2108;2121;2142;2166;2167;2169;2180;2289;2382;2587;2588;2589;2657	222;226;227;228;229;230;231;232;233;649;650;744;861;862;1009;1010;1065;1332;1554;1555;1556;1586;1587;1643;1644;1645;1646;1867;1933;1934;2133;2134;2135;2136;2254;2255;2256;2257;2311;2312;2313;2473;2474;2475;2476;2644;2645;2716;2717;2736;2737;2772;2773;3363;3364;3365;3367;3368;3369;3370;3421;3422;3423;3424;3470;3471;3486;3487;3488;3489;3535;3536;3558;3559;3560;3561;3562;3563;3686;3807;3900;3901;390…	248;252;253;254;255;256;257;258;259;713;714;811;943;944;1107;1108;1168;1445;1681;1682;1683;1713;1714;1777;1778;1779;1780;2007;2073;2074;2288;2289;2290;2291;2292;2293;2419;2420;2421;2422;2476;2477;2478;2674;2675;2676;2677;2851;2852;2923;2924;2943;2944;2980;2981;3637;3638;3639;3640;3642;3643;3644;3645;3698;3699;3700;3701;3749;3750;3765;3766;3767;3768;3814;3815;3838;3839;3840;3841;3842;3843;3844;384…	248;254;258;713;811;943;1107;1168;1445;1682;1683;1714;1778;1779;2007;2073;2288;2293;2422;2478;2676;2851;2924;2943;2981;3639;3640;3643;3699;3701;3750;3766;3814;3815;3839;3840;3989;4131;4235;4253;4450;4499;4526;4528;4607;4685;4747;4807;4833;4863;4928;4998;5005;5007;5026;5284;5513;6058;6060;6066;6237
A0A140TAI3	A0A140TAI3	22	22	2			tr|A0A140TAI3|A0A140TAI3_RAT Heterogeneous nuclear ribonucleoprotein C OS=Rattus norvegicus OX=10116 GN=Hnrnpc PE=1 SV=1	1	22	22	2	6	22	6	22	0	2	52.6	52.6	6.8	32.322	293	293	0	193.17	15.4	52.6	2744400000	563370000	2181000000	621800000	1576400000	8	32	40				84	34;216;252;464;627;628;629;637;1016;1017;1273;1413;1475;1476;1494;1607;1608;1647;2390;2391;2396;2464	True;True;True;True;True;True;True;True;True;True;True;True;True;True;True;True;True;True;True;True;True;True	34;224;260;476;640;641;642;650;1034;1035;1292;1433;1500;1501;1519;1634;1635;1674;2429;2430;2435;2504	82;480;481;545;546;998;1328;1329;1330;1331;1348;2147;2148;2706;2707;3015;3128;3129;3130;3131;3132;3133;3173;3174;3419;3420;3504;5204;5205;5212;5392;5393	98;526;527;596;597;598;1096;1441;1442;1443;1444;1470;2304;2305;2913;2914;3266;3391;3392;3393;3394;3395;3396;3397;3398;3399;3440;3441;3696;3697;3783;5689;5690;5697;5888;5889;5890;5891;5892;5893;5894	98;526;596;1096;1442;1443;1444;1470;2304;2305;2914;3266;3392;3399;3441;3696;3697;3783;5689;5690;5697;5891
M0R469	M0R469	15	15	15		RGD1566359	tr|M0R469|M0R469_RAT RCG24243 OS=Rattus norvegicus OX=10116 GN=RGD1566359 PE=4 SV=1	1	15	15	15	14	15	14	15	14	15	88.4	88.4	88.4	20.08	189	189	0	270.4	88.4	88.4	2645700000	972670000	1673000000	1081700000	1144200000	27	31	58				223	11;13;15;1207;1437;1572;1573;1615;1616;1818;2319;2324;2514;2611;2612	True;True;True;True;True;True;True;True;True;True;True;True;True;True;True	11;13;15;1225;1226;1457;1598;1599;1642;1643;1846;2358;2363;2555;2655;2656	24;25;26;29;30;31;32;35;36;37;38;39;40;2589;2590;2591;2592;3057;3058;3346;3347;3348;3349;3350;3351;3438;3439;3440;3441;3442;3884;3885;3886;3887;4997;4998;4999;5007;5008;5009;5010;5494;5495;5496;5716;5717;5718;5719;5720;5721;5722	39;40;41;44;45;46;47;51;52;53;54;55;56;2794;2795;2796;2797;2798;2799;3308;3309;3617;3618;3619;3620;3621;3622;3715;3716;3717;3718;3719;4217;4218;4219;4220;5448;5449;5450;5458;5459;5460;5461;5462;5463;5997;5998;5999;6000;6001;6002;6227;6228;6229;6230;6231;6232;6233	39;44;56;2795;3308;3617;3622;3718;3719;4220;5449;5458;5998;6231;6233	22	168
A0JN25;P19332-7	A0JN25;P19332-7	35;32	35;32	2;0	Microtubule-associated protein;Microtubule-associated protein tau	Mapt	tr|A0JN25|A0JN25_RAT Microtubule-associated protein OS=Rattus norvegicus OX=10116 GN=Mapt PE=1 SV=1;sp|P19332-7|TAU_RAT Isoform Tau-G of Microtubule-associated protein tau OS=Rattus norvegicus OX=10116 GN=Mapt	2	35	35	2	31	33	31	33	2	2	74.1	74.1	5.5	35.896	343	343;372	0	314.86	65.9	72.9	2471200000	1158200000	1313000000	1114200000	1033500000	52	55	107				85	51;129;130;286;615;616;808;872;925;926;927;929;930;1101;1231;1311;1312;1347;1873;1951;1989;1990;2089;2090;2093;2190;2286;2290;2291;2292;2332;2363;2364;2384;2467	True;True;True;True;True;True;True;True;True;True;True;True;True;True;True;True;True;True;True;True;True;True;True;True;True;True;True;True;True;True;True;True;True;True;True	53;133;134;294;628;629;824;889;942;943;944;946;947;1119;1250;1330;1331;1366;1901;1983;2022;2023;2124;2125;2128;2226;2324;2328;2329;2330;2371;2402;2403;2423;2507	116;286;287;288;616;617;1296;1297;1298;1299;1300;1301;1302;1303;1710;1711;1712;1713;1852;1853;1854;1855;1959;1960;1961;1962;1963;1964;1965;1966;1967;1972;1973;1974;1975;1976;2336;2638;2777;2778;2779;2780;2781;2855;4006;4007;4008;4193;4194;4287;4288;4289;4290;4291;4292;4494;4495;4496;4497;4498;4505;4506;4507;4508;4709;4917;4918;4919;4920;4925;4926;4927;4928;4929;4930;4931;4932;5026;5027;5028;5029;…	132;313;314;315;669;670;1404;1405;1406;1407;1408;1409;1410;1411;1412;1844;1845;1846;1847;1992;1993;1994;1995;2102;2103;2104;2105;2106;2107;2108;2109;2110;2115;2116;2117;2118;2119;2501;2845;2985;2986;2987;2988;2989;2990;2991;3070;4351;4352;4353;4559;4560;4658;4659;4660;4661;4662;4663;4871;4872;4873;4874;4875;4882;4883;4884;4885;4886;4887;4888;4889;5136;5352;5353;5354;5355;5356;5357;5358;5359;5364;…	132;313;315;669;1405;1410;1846;1995;2104;2107;2109;2115;2117;2501;2845;2988;2990;3070;4351;4560;4659;4662;4872;4875;4885;5136;5356;5365;5367;5373;5483;5581;5584;5678;5898
Q5U1W8	Q5U1W8	9	9	9		LOC100911295	tr|Q5U1W8|Q5U1W8_RAT High-mobility group nucleosome binding domain 1 OS=Rattus norvegicus OX=10116 GN=LOC100911295 PE=1 SV=1	1	9	9	9	9	6	9	6	9	6	62.5	62.5	62.5	10.124	96	96	0	176.18	62.5	61.5	2224300000	1468900000	755420000	1194000000	828300000	13	9	22				311	722;723;1187;1323;1597;1598;1599;2484;2485	True;True;True;True;True;True;True;True;True	737;738;1205;1342;1624;1625;1626;2524;2525	1531;1532;1533;1534;2547;2548;2549;2550;2805;2806;3397;3398;3399;3400;3401;3402;5427;5428;5429;5430;5431;5432	1658;1659;1660;1661;2751;2752;2753;2754;3017;3018;3674;3675;3676;3677;3678;3679;5928;5929;5930;5931;5932;5933	1659;1660;2752;3017;3674;3675;3677;5930;5933
A0A0G2K3J3;Q63665-2;Q63665;Q63665-3	A0A0G2K3J3;Q63665-2;Q63665;Q63665-3	19;19;19;18	19;19;19;18	14;14;14;13	Upstream stimulatory factor 2	Usf2	tr|A0A0G2K3J3|A0A0G2K3J3_RAT Upstream stimulatory factor 2 OS=Rattus norvegicus OX=10116 GN=Usf2 PE=1 SV=1;sp|Q63665-2|USF2_RAT Isoform 2 of Upstream stimulatory factor 2 OS=Rattus norvegicus OX=10116 GN=Usf2;sp|Q63665|USF2_RAT Upstream stimulatory factor	4	19	19	14	5	19	5	19	4	14	38.9	38.9	32.4	36.08	339	339;319;346;279	0	242.3	18.6	38.9	2053100000	55403000	1997700000	55403000	1497900000	5	30	35				42	40;187;191;192;328;905;906;946;947;979;1451;1452;1495;1673;1710;2204;2214;2226;2227	True;True;True;True;True;True;True;True;True;True;True;True;True;True;True;True;True;True;True	40;193;197;198;199;336;922;923;963;964;997;1473;1474;1520;1700;1737;2240;2251;2263;2264	95;420;421;427;428;429;430;431;432;704;705;1921;1922;1923;2009;2010;2011;2012;2085;3085;3086;3087;3175;3552;3553;3626;4731;4764;4765;4784;4785;4786;4787	111;465;466;472;473;474;475;476;477;771;772;2061;2062;2063;2152;2153;2154;2155;2156;2157;2231;3342;3343;3344;3442;3832;3833;3910;5159;5197;5198;5217;5218;5219;5220	111;466;473;475;772;2061;2062;2154;2157;2231;3343;3344;3442;3833;3910;5159;5198;5217;5220	2	332
P15337;P15337-2;A0A0G2K748;D3ZXY8;A0A0G2JYV9;F7FD47;Q03061-1	P15337;P15337-2;A0A0G2K748;D3ZXY8;A0A0G2JYV9	13;12;7;7;7;5;3	13;12;7;7;7;5;3	13;12;7;7;7;5;3	Cyclic AMP-responsive element-binding protein 1	Creb1;Crem	sp|P15337|CREB1_RAT Cyclic AMP-responsive element-binding protein 1 OS=Rattus norvegicus OX=10116 GN=Creb1 PE=1 SV=1;sp|P15337-2|CREB1_RAT Isoform 2 of Cyclic AMP-responsive element-binding protein 1 OS=Rattus norvegicus OX=10116 GN=Creb1;tr|A0A0G2K748|A0A	7	13	13	13	9	11	9	11	9	11	33.7	33.7	33.7	36.633	341	341;327;102;113;357;268;357	0	175.52	24.6	33.7	2035900000	849890000	1186000000	783110000	960560000	15	15	30				243	149;150;294;344;964;1103;1248;1298;2183;2258;2380;2381;2382	True;True;True;True;True;True;True;True;True;True;True;True;True	154;155;302;353;981;1121;1267;1317;2219;2295;2419;2420;2421	332;333;334;335;336;337;643;644;645;646;747;2047;2048;2049;2050;2341;2342;2665;2755;2756;4698;4699;4700;4859;5186;5187;5188;5189;5190	365;366;367;368;369;370;707;708;709;710;814;2193;2194;2195;2196;2506;2507;2872;2963;2964;5124;5125;5126;5127;5293;5671;5672;5673;5674;5675	366;370;710;814;2195;2506;2872;2964;5127;5293;5672;5674;5675
D3ZZZ0;A0A0G2K160	D3ZZZ0;A0A0G2K160	37;37	37;37	37;37		Ahctf1	tr|D3ZZZ0|D3ZZZ0_RAT AT hook-containing transcription factor 1 OS=Rattus norvegicus OX=10116 GN=Ahctf1 PE=1 SV=1;tr|A0A0G2K160|A0A0G2K160_RAT AT hook-containing transcription factor 1 OS=Rattus norvegicus OX=10116 GN=Ahctf1 PE=1 SV=1	2	37	37	37	30	35	30	35	30	35	18	18	18	247.88	2240	2240;2312	0	323.31	14.9	17.8	1949000000	811090000	1137900000	846150000	819740000	42	48	90				33	16;59;125;159;333;388;424;425;426;465;485;490;609;1106;1112;1163;1269;1288;1320;1321;1354;1543;1544;1574;1585;1586;1682;1708;1810;1831;1967;1968;1979;2269;2365;2371;2470	True;True;True;True;True;True;True;True;True;True;True;True;True;True;True;True;True;True;True;True;True;True;True;True;True;True;True;True;True;True;True;True;True;True;True;True;True	16;61;129;164;342;399;435;436;437;477;497;502;622;1124;1130;1181;1288;1307;1339;1340;1373;1569;1570;1600;1611;1612;1613;1709;1735;1838;1859;1999;2000;2012;2307;2404;2410;2510	41;42;43;129;130;276;277;353;354;355;356;724;725;726;846;847;919;920;921;922;923;999;1000;1036;1037;1048;1286;1287;2347;2348;2360;2503;2699;2700;2735;2799;2800;2801;2802;2803;2885;3282;3283;3284;3285;3286;3352;3353;3371;3372;3373;3374;3375;3376;3377;3378;3379;3567;3568;3619;3620;3621;3865;3866;3915;3916;3917;4236;4237;4238;4239;4261;4262;4263;4264;4883;5115;5126;5127;5128;5129;5402;5403;5404	57;58;59;145;146;303;304;387;388;389;390;391;791;792;793;928;929;1005;1006;1007;1008;1009;1010;1097;1098;1136;1137;1151;1392;1393;1394;1395;2512;2513;2525;2707;2906;2907;2942;3009;3010;3011;3012;3013;3014;3015;3130;3552;3553;3554;3555;3556;3623;3624;3646;3647;3648;3649;3650;3651;3652;3653;3654;3849;3850;3901;3902;3903;4194;4195;4259;4260;4261;4603;4604;4605;4606;4632;4633;4634;4635;5317;5587;5598…	57;145;304;391;792;928;1006;1007;1010;1098;1137;1151;1393;2513;2525;2707;2906;2942;3010;3014;3130;3552;3556;3623;3649;3653;3850;3903;4195;4261;4603;4606;4635;5317;5587;5600;5904	1	2018
M0RD75;P62755	M0RD75;P62755	7;7	7;7	7;7	40S ribosomal protein S6	Rps6	tr|M0RD75|M0RD75_RAT 40S ribosomal protein S6 OS=Rattus norvegicus OX=10116 GN=Rps6 PE=1 SV=1;sp|P62755|RS6_RAT 40S ribosomal protein S6 OS=Rattus norvegicus OX=10116 GN=Rps6 PE=1 SV=1	2	7	7	7	6	6	6	6	6	6	25.1	25.1	25.1	28.421	247	247;249	0	78.445	20.6	22.3	1897500000	821390000	1076100000	934540000	697820000	10	11	21				231	450;895;1133;1265;1342;1525;2247	True;True;True;True;True;True;True	462;912;1151;1284;1361;1551;2284	975;976;977;1893;2405;2406;2407;2408;2691;2840;2841;2842;2843;2844;2845;3241;3242;3243;3244;4838;4839	1073;1074;1075;2033;2571;2572;2573;2574;2898;3053;3054;3055;3056;3057;3058;3508;3509;3510;3511;5272;5273	1075;2033;2574;2898;3056;3510;5272
O88791	O88791	8	8	8		Hmga2	tr|O88791|O88791_RAT High mobility group AT-hook 2 OS=Rattus norvegicus OX=10116 GN=Hmga2 PE=1 SV=1	1	8	8	8	8	8	8	8	8	8	74.8	74.8	74.8	11.676	107	107	0	132.84	74.8	74.8	1847500000	848950000	998520000	826930000	774500000	25	28	53				236	28;56;632;633;1148;1196;1827;1828	True;True;True;True;True;True;True;True	28;58;645;646;1166;1214;1855;1856	67;68;69;70;121;122;123;1335;1336;1337;1338;1339;1340;1341;2450;2451;2452;2453;2563;2564;3902;3903;3904;3905;3906;3907	83;84;85;86;137;138;139;1448;1449;1450;1451;1452;1453;1454;1455;1456;1457;1458;1459;1460;1461;1462;1463;2619;2620;2621;2622;2623;2624;2625;2626;2627;2628;2629;2767;2768;2769;4236;4237;4238;4239;4240;4241;4242;4243;4244;4245;4246;4247;4248;4249;4250;4251	84;137;1448;1459;2627;2767;4239;4247
Q5D059;P61980;M0R9K1	Q5D059;P61980;M0R9K1	25;25;23	25;25;23	25;25;23	Heterogeneous nuclear ribonucleoprotein K	Hnrnpk;LOC100359916	tr|Q5D059|Q5D059_RAT Heterogeneous nuclear ribonucleoprotein K OS=Rattus norvegicus OX=10116 GN=Hnrnpk PE=1 SV=1;sp|P61980|HNRPK_RAT Heterogeneous nuclear ribonucleoprotein K OS=Rattus norvegicus OX=10116 GN=Hnrnpk PE=1 SV=1;tr|M0R9K1|M0R9K1_RAT Heterogene	3	25	25	25	14	24	14	24	14	24	44.2	44.2	44.2	51.028	464	464;463;463	0	228.68	28.2	44.2	1834300000	411600000	1422700000	420930000	1058600000	19	43	62				268	157;330;381;665;666;785;796;797;945;951;1247;1290;1389;1478;1479;1480;1537;1538;1539;1570;1715;1766;1767;2091;2192	True;True;True;True;True;True;True;True;True;True;True;True;True;True;True;True;True;True;True;True;True;True;True;True;True	162;339;392;680;681;801;812;813;962;968;1266;1309;1409;1503;1504;1505;1563;1564;1565;1596;1742;1793;1794;2126;2228	348;349;715;716;717;718;833;834;1418;1419;1420;1657;1658;1683;1684;1685;1686;1687;2008;2018;2019;2664;2738;2739;2964;2965;2966;3135;3136;3137;3138;3139;3140;3141;3269;3270;3271;3272;3273;3274;3275;3342;3640;3641;3642;3643;3753;3754;3755;3756;3757;3758;4499;4500;4501;4502;4711	382;383;782;783;784;785;914;915;916;1543;1544;1545;1791;1792;1817;1818;1819;1820;1821;2151;2164;2165;2871;2945;2946;3211;3212;3213;3214;3215;3401;3402;3403;3404;3405;3406;3407;3536;3537;3538;3539;3540;3541;3542;3543;3544;3545;3613;3926;3927;3928;3929;4062;4063;4064;4065;4066;4067;4876;4877;4878;4879;5138	383;785;916;1543;1545;1792;1817;1821;2151;2164;2871;2945;3214;3401;3403;3407;3537;3541;3543;3613;3929;4063;4064;4877;5138
P18445;A0A0G2K7W6;D4AAY6;D3ZG03;D3ZI60;D3ZF07	P18445;A0A0G2K7W6	8;4;3;2;2;2	8;4;3;2;2;2	8;4;3;2;2;2	60S ribosomal protein L27a	Rpl27a	sp|P18445|RL27A_RAT 60S ribosomal protein L27a OS=Rattus norvegicus OX=10116 GN=Rpl27a PE=1 SV=3;tr|A0A0G2K7W6|A0A0G2K7W6_RAT Similar to 60S ribosomal protein L27a OS=Rattus norvegicus OX=10116 GN=RGD1562402 PE=3 SV=1	6	8	8	8	8	6	8	6	8	6	39.9	39.9	39.9	16.618	148	148;148;144;148;148;153	0	85.851	39.9	39.9	1747700000	940370000	807370000	932280000	616520000	13	10	23				248	721;750;751;977;1124;1314;1528;2572	True;True;True;True;True;True;True;True	736;765;766;995;1142;1333;1554;2615	1529;1530;1582;1583;1584;1585;2078;2079;2080;2081;2082;2083;2382;2383;2384;2385;2783;2784;2785;2786;3247;3248;5625	1656;1657;1709;1710;1711;1712;2224;2225;2226;2227;2228;2229;2548;2549;2550;2551;2993;2994;2995;2996;3514;3515;6135	1656;1709;1712;2229;2548;2996;3515;6135	24	38
A0A0G2KAZ7;Q3SWU3;M0R9X3	A0A0G2KAZ7;Q3SWU3	26;16;1	23;13;0	23;13;0	Heterogeneous nuclear ribonucleoprotein D-like	Hnrnpdl	tr|A0A0G2KAZ7|A0A0G2KAZ7_RAT Heterogeneous nuclear ribonucleoprotein D-like OS=Rattus norvegicus OX=10116 GN=Hnrnpdl PE=1 SV=1;sp|Q3SWU3|HNRDL_RAT Heterogeneous nuclear ribonucleoprotein D-like OS=Rattus norvegicus OX=10116 GN=Hnrnpdl PE=1 SV=1	3	26	23	23	24	22	21	20	21	20	38.9	37	37	46.307	419	419;322;565	0	256.15	34.4	37	1742400000	991930000	750500000	944570000	612940000	28	25	53				66	275;305;343;518;536;539;641;642;648;837;887;888;889;1212;1213;1214;1335;1650;1725;1726;2302;2375;2441;2573;2574;2575	False;True;True;True;False;True;True;True;False;True;True;True;True;True;True;True;True;True;True;True;True;True;True;True;True;True	283;313;352;530;548;552;654;655;662;854;904;905;906;1231;1232;1233;1354;1677;1752;1753;2340;2414;2481;2616;2617;2618	594;595;662;663;664;745;746;1107;1108;1109;1110;1137;1138;1146;1147;1148;1149;1359;1360;1361;1362;1376;1789;1790;1881;1882;1883;1884;1885;1886;1887;2604;2605;2606;2607;2608;2609;2610;2611;2827;3508;3509;3668;3669;3670;3671;3672;3673;3674;4955;4956;4957;4958;5138;5336;5337;5626;5627;5628;5629;5630;5631;5632;5633	647;648;726;727;728;812;813;1213;1214;1215;1216;1243;1244;1252;1253;1254;1255;1481;1482;1483;1484;1500;1928;1929;2021;2022;2023;2024;2025;2026;2027;2811;2812;2813;2814;2815;2816;2817;2818;3039;3787;3788;3971;3972;3973;3974;3975;3976;3977;5402;5403;5404;5405;5610;5830;5831;6136;6137;6138;6139;6140;6141;6142;6143	648;726;813;1214;1243;1255;1481;1483;1500;1928;2021;2022;2025;2812;2814;2815;3039;3788;3971;3976;5402;5610;5830;6136;6139;6142
D3ZXH7	D3ZXH7	10	10	10		Alyref	tr|D3ZXH7|D3ZXH7_RAT Aly/REF export factor OS=Rattus norvegicus OX=10116 GN=Alyref PE=1 SV=1	1	10	10	10	10	9	10	9	10	9	37	37	37	19.915	189	189	0	115.77	37	28.6	1701800000	1006000000	695780000	960580000	561890000	15	13	28				150	36;37;43;44;100;1026;1563;2006;2007;2008	True;True;True;True;True;True;True;True;True;True	36;37;43;44;45;46;103;1044;1589;2039;2040;2041	87;88;89;90;91;92;100;101;102;103;104;221;2163;2164;3331;3332;3333;4322;4323;4324;4325;4326;4327;4328;4329;4330;4331;4332	103;104;105;106;107;108;116;117;118;119;120;247;2320;2321;3602;3603;3604;4693;4694;4695;4696;4697;4698;4699;4700;4701;4702;4703	104;106;116;120;247;2320;3602;4693;4697;4700	13	5
A0A0G2K747;G3V7K6;P28042	A0A0G2K747;G3V7K6;P28042	13;12;12	13;12;12	13;12;12	Single-stranded DNA-binding protein, mitochondrial	Ssbp1	tr|A0A0G2K747|A0A0G2K747_RAT Single-stranded DNA binding protein 1, isoform CRA_b OS=Rattus norvegicus OX=10116 GN=Ssbp1 PE=1 SV=1;tr|G3V7K6|G3V7K6_RAT Single-stranded DNA-binding protein, mitochondrial OS=Rattus norvegicus OX=10116 GN=Ssbp1 PE=1 SV=2;sp|P	3	13	13	13	11	11	11	11	11	11	73	73	73	17.17	148	148;150;151	0	232.62	69.6	68.9	1641300000	741870000	899440000	740960000	678730000	15	14	29				55	374;375;915;1605;1606;1697;1780;1917;1918;2016;2394;2395;2409	True;True;True;True;True;True;True;True;True;True;True;True;True	384;385;932;1632;1633;1724;1808;1949;1950;2049;2433;2434;2448	821;822;823;824;1939;3413;3414;3415;3416;3417;3418;3594;3595;3792;4122;4123;4124;4125;4126;4127;4128;4129;4341;4342;4343;4344;5210;5211;5255;5256	902;903;904;905;2079;3690;3691;3692;3693;3694;3695;3876;3877;4106;4483;4484;4485;4486;4487;4488;4489;4490;4712;4713;4714;4715;5695;5696;5749;5750	902;904;2079;3693;3695;3877;4106;4483;4490;4712;5695;5696;5750
Q63560-2;Q63560;F1LQZ9	Q63560-2;Q63560;F1LQZ9	28;27;25	28;27;25	28;27;25	Microtubule-associated protein 6	Map6	sp|Q63560-2|MAP6_RAT Isoform 2 of Microtubule-associated protein 6 OS=Rattus norvegicus OX=10116 GN=Map6;sp|Q63560|MAP6_RAT Microtubule-associated protein 6 OS=Rattus norvegicus OX=10116 GN=Map6 PE=1 SV=1;tr|F1LQZ9|F1LQZ9_RAT Microtubule-associated protein	3	28	28	28	27	25	27	25	27	25	65.3	65.3	65.3	70.622	660	660;952;952	0	323.31	65.2	62.6	1515500000	821610000	693840000	756630000	587860000	39	32	71				322	89;90;91;92;228;234;235;256;469;507;610;761;1034;1035;1617;1740;1788;1789;1868;1896;1897;1898;1931;2197;2198;2329;2471;2608	True;True;True;True;True;True;True;True;True;True;True;True;True;True;True;True;True;True;True;True;True;True;True;True;True;True;True;True	91;92;93;94;236;242;243;264;481;519;623;776;1052;1053;1644;1767;1816;1817;1896;1928;1929;1930;1963;2233;2234;2368;2511;2652	194;195;196;197;198;199;200;201;202;501;502;510;511;512;513;514;558;559;1004;1005;1006;1007;1080;1288;1289;1606;1607;2187;2188;2189;3443;3699;3700;3808;3809;3810;3811;3812;3813;3814;3815;3816;4000;4001;4078;4079;4080;4081;4082;4083;4084;4085;4086;4149;4150;4151;4152;4719;4720;4721;4722;4723;5019;5020;5405;5711;5712	214;215;216;217;218;219;220;221;222;223;224;547;548;561;562;563;564;565;610;611;1102;1103;1104;1105;1183;1396;1397;1734;1735;2348;2349;2350;3720;4002;4003;4132;4133;4134;4135;4136;4137;4138;4139;4140;4345;4346;4435;4436;4437;4438;4439;4440;4441;4442;4443;4444;4512;4513;4514;4515;5146;5147;5148;5149;5150;5151;5472;5473;5906;6222;6223	215;217;218;224;547;562;563;611;1105;1183;1397;1734;2348;2350;3720;4002;4132;4137;4346;4435;4438;4442;4514;5147;5150;5472;5906;6222
P27008	P27008	37	37	37	Poly [ADP-ribose] polymerase 1	Parp1	sp|P27008|PARP1_RAT Poly [ADP-ribose] polymerase 1 OS=Rattus norvegicus OX=10116 GN=Parp1 PE=1 SV=4	1	37	37	37	23	36	23	36	23	36	37.3	37.3	37.3	112.66	1014	1014	0	307.35	27.6	36.3	1389200000	273650000	1115500000	330130000	784180000	24	47	71				255	49;267;302;404;421;422;442;623;625;626;658;664;711;829;897;1054;1071;1072;1129;1225;1339;1367;1368;1383;1431;1559;1656;1743;1841;2140;2178;2257;2298;2406;2509;2512;2513	True;True;True;True;True;True;True;True;True;True;True;True;True;True;True;True;True;True;True;True;True;True;True;True;True;True;True;True;True;True;True;True;True;True;True;True;True	51;275;310;415;432;433;454;636;638;639;673;679;726;846;914;1072;1089;1090;1147;1244;1358;1386;1387;1403;1451;1585;1683;1770;1869;2175;2214;2294;2336;2445;2550;2553;2554	113;114;578;657;658;874;915;916;962;1319;1320;1321;1322;1324;1325;1326;1327;1399;1400;1401;1415;1416;1417;1504;1772;1773;1774;1898;1899;2241;2242;2243;2280;2281;2396;2397;2628;2629;2833;2834;2908;2909;2910;2954;3048;3320;3321;3322;3521;3522;3523;3711;3712;3938;3939;4614;4615;4689;4857;4858;4942;4943;4944;5250;5251;5484;5485;5489;5490;5491;5492;5493	129;130;631;721;722;956;1001;1002;1059;1431;1432;1433;1434;1436;1437;1438;1439;1440;1524;1525;1526;1540;1541;1542;1631;1911;1912;1913;2038;2039;2406;2407;2408;2445;2446;2562;2563;2835;2836;3045;3046;3155;3156;3157;3201;3299;3591;3592;3593;3800;3801;3802;4019;4020;4283;4284;5015;5016;5115;5291;5292;5385;5386;5387;5744;5745;5987;5988;5992;5993;5994;5995;5996	129;631;721;956;1001;1002;1059;1434;1436;1440;1526;1541;1631;1912;2039;2406;2445;2446;2563;2835;3046;3155;3157;3201;3299;3591;3801;4020;4284;5016;5115;5292;5386;5745;5988;5992;5993
F1LRL9;P15205	F1LRL9;P15205	24;24	24;24	24;24	Microtubule-associated protein 1B;MAP1B heavy chain;MAP1 light chain LC1	Map1b	tr|F1LRL9|F1LRL9_RAT Microtubule-associated protein 1B OS=Rattus norvegicus OX=10116 GN=Map1b PE=1 SV=1;sp|P15205|MAP1B_RAT Microtubule-associated protein 1B OS=Rattus norvegicus OX=10116 GN=Map1b PE=1 SV=2	2	24	24	24	21	22	21	22	21	22	9.3	9.3	9.3	269.64	2461	2461;2459	0	323.31	7.8	9.1	1272300000	542330000	730010000	539490000	552970000	31	32	63				186	166;207;500;501;1007;1851;2057;2120;2166;2241;2243;2244;2279;2280;2281;2282;2288;2330;2335;2336;2337;2338;2339;2340	True;True;True;True;True;True;True;True;True;True;True;True;True;True;True;True;True;True;True;True;True;True;True;True	171;214;512;513;1025;1879;2090;2155;2202;2278;2280;2281;2317;2318;2319;2320;2326;2369;2374;2375;2376;2377;2378;2379	373;462;463;1070;1071;1072;2130;3964;3965;4419;4420;4567;4568;4569;4570;4571;4663;4820;4821;4822;4823;4826;4827;4828;4829;4830;4831;4832;4833;4900;4901;4902;4903;4904;4905;4906;4907;4908;4909;4922;4923;5021;5022;5023;5024;5036;5037;5038;5039;5040;5041;5042;5043;5044;5045;5046;5047;5048;5049;5050;5051;5052;5053;5054	410;507;508;1173;1174;1175;2284;4309;4310;4793;4794;4957;4958;4959;4960;4961;5080;5253;5254;5255;5256;5259;5260;5261;5262;5263;5264;5265;5266;5334;5335;5336;5337;5338;5339;5340;5341;5342;5343;5361;5362;5474;5475;5476;5477;5490;5491;5492;5493;5494;5495;5496;5497;5498;5499;5500;5501;5502;5503;5504;5505;5506;5507;5508	410;507;1174;1175;2284;4309;4794;4958;5080;5254;5260;5266;5335;5337;5339;5342;5362;5477;5493;5496;5498;5503;5506;5508
P83732;A0A0H2UH99;M0RBD1	P83732;A0A0H2UH99	18;17;5	18;17;5	18;17;5	60S ribosomal protein L24	Rpl24	sp|P83732|RL24_RAT 60S ribosomal protein L24 OS=Rattus norvegicus OX=10116 GN=Rpl24 PE=2 SV=1;tr|A0A0H2UH99|A0A0H2UH99_RAT 60S ribosomal protein L24 OS=Rattus norvegicus OX=10116 GN=Rpl24 PE=1 SV=1	3	18	18	18	16	18	16	18	16	18	71.3	71.3	71.3	17.779	157	157;156;158	0	164.33	71.3	71.3	1212900000	563430000	649500000	556140000	493190000	21	26	47				283	117;118;196;278;279;767;852;1018;1083;1169;1426;1634;1635;1765;2181;2182;2189;2401	True;True;True;True;True;True;True;True;True;True;True;True;True;True;True;True;True;True	120;121;122;203;286;287;783;869;1036;1101;1187;1446;1661;1662;1792;2217;2218;2225;2440	259;260;261;262;263;264;265;439;440;598;599;600;601;602;603;1620;1621;1622;1623;1818;1819;1820;1821;2149;2150;2151;2305;2514;2515;2516;2517;3038;3039;3040;3472;3473;3474;3475;3476;3751;3752;4694;4695;4696;4697;4706;4707;4708;5219	286;287;288;289;290;291;292;484;485;651;652;653;654;655;656;1750;1751;1752;1753;1958;1959;1960;1961;2306;2307;2308;2470;2718;2719;2720;2721;3289;3290;3291;3751;3752;3753;3754;3755;4060;4061;5120;5121;5122;5123;5133;5134;5135;5704	288;290;485;651;655;1751;1959;2306;2470;2721;3291;3752;3754;4060;5121;5123;5134;5704	29	91
A0A0G2K5M1;D3ZT88;A0A0G2JUC1	A0A0G2K5M1	17;2;1	17;2;1	14;0;1			tr|A0A0G2K5M1|A0A0G2K5M1_RAT Sp3 transcription factor OS=Rattus norvegicus OX=10116 GN=Sp3 PE=1 SV=1	3	17	17	14	5	17	5	17	4	14	15	15	12.3	75.419	714	714;376;398	0	248.28	9	15	1184300000	76025000	1108300000	77938000	833300000	6	23	29				51	430;431;579;604;606;950;1069;1070;1722;1799;2358;2359;2360;2473;2474;2475;2527	True;True;True;True;True;True;True;True;True;True;True;True;True;True;True;True;True	441;442;592;617;619;967;1087;1088;1749;1827;2397;2398;2399;2513;2514;2515;2570	930;931;1227;1275;1276;1277;1279;2015;2016;2017;2275;2276;2277;2278;2279;3662;3663;3842;5103;5104;5105;5408;5409;5410;5411;5412;5413;5414;5415;5526	1017;1018;1333;1381;1382;1383;1385;2161;2162;2163;2440;2441;2442;2443;2444;3965;3966;4168;5575;5576;5577;5909;5910;5911;5912;5913;5914;5915;5916;6032	1017;1018;1333;1381;1385;2163;2440;2443;3965;4168;5575;5576;5577;5910;5915;5916;6032
P83883;F8WFR5;M0R7E5;D3ZDE0	P83883	14;5;1;1	14;5;1;1	14;5;1;1	60S ribosomal protein L36a	Rpl36a	sp|P83883|RL36A_RAT 60S ribosomal protein L36a OS=Rattus norvegicus OX=10116 GN=Rpl36a PE=1 SV=2	4	14	14	14	11	13	11	13	11	13	64.2	64.2	64.2	12.441	106	106;106;105;106	0	109.05	63.2	64.2	1135400000	524870000	610480000	527710000	457230000	16	18	34				284	291;363;364;713;714;835;836;873;1019;1080;1084;1105;1237;1686	True;True;True;True;True;True;True;True;True;True;True;True;True;True	299;373;374;728;729;852;853;890;1037;1098;1102;1123;1256;1713	623;624;799;800;801;1509;1510;1511;1512;1513;1514;1515;1785;1786;1787;1788;1856;1857;1858;2152;2153;2154;2155;2298;2299;2300;2301;2306;2307;2345;2346;2646;3573;3574	676;677;880;881;882;1636;1637;1638;1639;1640;1641;1642;1924;1925;1926;1927;1996;1997;1998;2309;2310;2311;2312;2463;2464;2465;2466;2471;2472;2510;2511;2853;3855;3856	677;880;881;1638;1642;1924;1927;1996;2312;2464;2471;2510;2853;3856
D3Z937;D4A586;REV__D4AD05	D3Z937	20;1;1	20;1;1	20;1;1		Hmg20a	tr|D3Z937|D3Z937_RAT High mobility group 20A OS=Rattus norvegicus OX=10116 GN=Hmg20a PE=1 SV=1	3	20	20	20	8	20	8	20	8	20	33.1	33.1	33.1	39.902	347	347;318;1846	0	218.3	21.6	33.1	1098600000	208430000	890130000	225890000	653350000	12	24	36				118	128;202;390;455;456;578;1166;1167;1432;1477;1603;1604;1769;2045;2046;2047;2194;2590;2598;2599	True;True;True;True;True;True;True;True;True;True;True;True;True;True;True;True;True;True;True;True	132;209;401;467;468;591;1184;1185;1452;1502;1630;1631;1796;2078;2079;2080;2230;2634;2642;2643	281;282;283;284;285;451;452;850;983;984;985;986;987;1226;2508;2509;2510;3049;3050;3134;3409;3410;3411;3412;3761;4398;4399;4400;4401;4402;4403;4404;4714;5669;5670;5671;5687;5688;5689	308;309;310;311;312;496;497;932;1081;1082;1083;1084;1085;1332;2712;2713;2714;3300;3301;3400;3686;3687;3688;3689;4070;4770;4771;4772;4773;4774;4775;4776;5141;6179;6180;6181;6197;6198;6199	310;497;932;1084;1085;1332;2712;2714;3300;3400;3686;3687;4070;4771;4775;4776;5141;6179;6197;6199
Q498U4	Q498U4	17	17	17	SAP domain-containing ribonucleoprotein	Sarnp	sp|Q498U4|SARNP_RAT SAP domain-containing ribonucleoprotein OS=Rattus norvegicus OX=10116 GN=Sarnp PE=1 SV=3	1	17	17	17	14	15	14	15	14	15	57.6	57.6	57.6	23.605	210	210	0	156.46	53.3	51.4	1085900000	419870000	665980000	455160000	466600000	18	20	38				295	197;225;226;542;543;544;545;582;702;745;1008;1192;1209;1275;2510;2511;2515	True;True;True;True;True;True;True;True;True;True;True;True;True;True;True;True;True	204;233;234;555;556;557;558;595;717;760;1026;1210;1228;1294;2551;2552;2556	441;496;497;498;499;1154;1155;1156;1157;1158;1159;1160;1161;1162;1231;1232;1233;1234;1487;1488;1489;1490;1573;1574;1575;2131;2132;2557;2558;2595;2596;2597;2709;2710;5486;5487;5488;5497	486;542;543;544;545;1260;1261;1262;1263;1264;1265;1266;1267;1268;1337;1338;1339;1340;1614;1615;1616;1617;1700;1701;1702;2285;2286;2287;2761;2762;2802;2803;2804;2916;2917;5989;5990;5991;6003	486;542;544;1260;1261;1264;1265;1337;1616;1701;2287;2762;2802;2916;5989;5991;6003
D3ZRM9;P41123;F1M2E9;D3ZD02;A0A0G2JYG9	D3ZRM9;P41123;F1M2E9;D3ZD02;A0A0G2JYG9	9;9;8;7;6	9;9;8;7;6	9;9;8;7;6	60S ribosomal protein L13	LOC100360491;Rpl13;RGD1563145	tr|D3ZRM9|D3ZRM9_RAT 60S ribosomal protein L13 OS=Rattus norvegicus OX=10116 GN=LOC100360491 PE=3 SV=1;sp|P41123|RL13_RAT 60S ribosomal protein L13 OS=Rattus norvegicus OX=10116 GN=Rpl13 PE=1 SV=2;tr|F1M2E9|F1M2E9_RAT 60S ribosomal protein L13 OS=Rattus no	5	9	9	9	6	8	6	8	6	8	45	45	45	24.202	211	211;211;210;210;202	0	67.534	34.1	40.3	1068200000	551240000	516970000	511010000	429820000	8	10	18				143	95;116;120;387;898;1074;1223;1530;2392	True;True;True;True;True;True;True;True;True	97;119;124;398;915;1092;1242;1556;2431	206;207;258;267;845;1900;1901;1902;1903;2283;2625;2626;3251;3252;3253;3254;5206;5207	228;229;285;294;927;2040;2041;2042;2043;2448;2832;2833;3518;3519;3520;3521;5691;5692	228;285;294;927;2040;2448;2832;3521;5692
P17078;D3ZN79;F1M6G3;D3ZB50	P17078;D3ZN79;F1M6G3	7;5;4;2	7;5;4;2	7;5;4;2	60S ribosomal protein L35	Rpl35;LOC686074;Gm8444	sp|P17078|RL35_RAT 60S ribosomal protein L35 OS=Rattus norvegicus OX=10116 GN=Rpl35 PE=1 SV=3;tr|D3ZN79|D3ZN79_RAT Similar to 60S ribosomal protein L35 OS=Rattus norvegicus OX=10116 GN=LOC686074 PE=3 SV=1;tr|F1M6G3|F1M6G3_RAT Uncharacterized protein OS=Rat	4	7	7	7	6	7	6	7	6	7	44.7	44.7	44.7	14.552	123	123;123;118;123	0	62.012	34.1	44.7	1006600000	470810000	535750000	485710000	388830000	9	9	18				245	487;1349;1652;1758;2455;2456;2589	True;True;True;True;True;True;True	499;1368;1679;1785;2495;2496;2633	1042;1043;2857;2858;2859;2860;3512;3741;3742;5371;5372;5373;5374;5667;5668	1142;1143;1144;1145;1146;3072;3073;3074;3075;3791;4050;4051;5867;5868;5869;5870;6177;6178	1143;3073;3791;4051;5867;5870;6178
P62804	P62804	10	10	10	Histone H4;Osteogenic growth peptide	Hist1h4b	sp|P62804|H4_RAT Histone H4 OS=Rattus norvegicus OX=10116 GN=Hist1h4b PE=1 SV=2	1	10	10	10	9	9	9	9	9	9	57.3	57.3	57.3	11.367	103	103	0	129.42	57.3	57.3	987350000	481240000	506110000	424040000	438600000	14	14	28				274	310;348;999;1000;1178;1750;2344;2345;2398;2399	True;True;True;True;True;True;True;True;True;True	318;357;1017;1018;1196;1777;2383;2384;2437;2438	671;672;673;674;752;753;754;755;2118;2119;2120;2121;2122;2123;2534;3724;3725;5061;5062;5063;5064;5065;5066;5214;5215;5216	735;736;737;738;819;820;821;822;2271;2272;2273;2274;2275;2276;2277;2738;4032;4033;4034;5515;5516;5517;5518;5519;5520;5699;5700;5701	737;819;2272;2274;2738;4033;5516;5520;5700;5701
D3ZV90;D4A532;D3ZCL0;D3ZZX2;G3V7R0;G3V6T9;D4A426;G3V6R6;D4ACC8;F1LQ30;Q9JLZ9;P39020;Q9JM00;O35762;P31246;A0JPN1	D3ZV90	17;1;1;1;1;1;1;1;1;1;1;1;1;1;1;1	17;1;1;1;1;1;1;1;1;1;1;1;1;1;1;1	12;0;0;0;0;0;0;0;0;0;0;0;0;0;0;0		Emx1	tr|D3ZV90|D3ZV90_RAT Empty spiracles homeobox 1 OS=Rattus norvegicus OX=10116 GN=Emx1 PE=4 SV=2	16	17	17	12	15	17	15	17	11	12	31.4	31.4	28.3	31.648	290	290;253;262;277;292;303;355;372;373;407;292;303;336;365;372;476	0	255.95	30.7	31.4	956970000	394320000	562650000	377080000	441250000	17	21	38				146	62;63;790;900;995;1107;1146;1240;1519;1520;1600;1643;1644;1649;2179;2180;2523	True;True;True;True;True;True;True;True;True;True;True;True;True;True;True;True;True	64;65;806;917;1013;1125;1164;1259;1545;1546;1627;1670;1671;1676;2215;2216;2566	137;138;139;140;141;1670;1671;1672;1906;1907;1908;2111;2349;2350;2445;2446;2447;2448;2652;2653;3232;3233;3234;3235;3403;3404;3495;3496;3497;3498;3499;3506;3507;4690;4691;4692;4693;5518;5519	153;154;155;156;157;1804;1805;1806;2046;2047;2048;2264;2514;2515;2614;2615;2616;2617;2859;2860;3499;3500;3501;3502;3680;3681;3774;3775;3776;3777;3778;3785;3786;5116;5117;5118;5119;6024;6025	154;156;1805;2046;2264;2515;2617;2860;3499;3501;3680;3776;3778;3785;5117;5119;6025
Q00969-2;Q00969;G3V7X9;D3ZBH0;A0A0G2K5F0	Q00969-2;Q00969	21;21;4;2;1	21;21;4;2;1	21;21;4;2;1	Cyclic AMP-dependent transcription factor ATF-2	Atf2	sp|Q00969-2|ATF2_RAT Isoform 2 of Cyclic AMP-dependent transcription factor ATF-2 OS=Rattus norvegicus OX=10116 GN=Atf2;sp|Q00969|ATF2_RAT Cyclic AMP-dependent transcription factor ATF-2 OS=Rattus norvegicus OX=10116 GN=Atf2 PE=1 SV=2	5	21	21	21	18	18	18	18	18	18	61.2	61.2	61.2	42.32	389	389;487;485;561;369	0	225.06	52.4	56	877390000	345290000	532110000	341870000	404410000	25	27	52				287	22;23;26;208;546;547;601;602;851;1030;1194;1271;1487;1496;1654;1655;1751;1845;1986;2193;2524	True;True;True;True;True;True;True;True;True;True;True;True;True;True;True;True;True;True;True;True;True	22;23;26;215;559;560;614;615;868;1048;1212;1290;1512;1521;1681;1682;1778;1873;2019;2229;2567	55;56;57;58;59;60;61;64;65;464;1163;1164;1165;1166;1266;1267;1268;1269;1270;1271;1272;1273;1816;1817;2174;2560;2561;2703;2704;3155;3176;3177;3515;3516;3517;3518;3519;3520;3726;3727;3951;3952;3953;3954;4278;4279;4280;4712;4713;5520;5521	71;72;73;74;75;76;77;80;81;509;1269;1270;1271;1272;1372;1373;1374;1375;1376;1377;1378;1379;1956;1957;2334;2335;2764;2765;2910;2911;3422;3443;3444;3794;3795;3796;3797;3798;3799;4035;4036;4296;4297;4298;4299;4649;4650;4651;5139;5140;6026;6027	71;75;80;509;1270;1272;1375;1378;1956;2334;2765;2910;3422;3443;3794;3799;4036;4298;4650;5140;6026
P62982;F1LU69;F1M927;D4A0J6	P62982;F1LU69	10;9;4;4	10;9;4;4	7;6;4;4	Ubiquitin-40S ribosomal protein S27a;Ubiquitin;40S ribosomal protein S27a	Rps27a;Rps27l3	sp|P62982|RS27A_RAT Ubiquitin-40S ribosomal protein S27a OS=Rattus norvegicus OX=10116 GN=Rps27a PE=1 SV=2;tr|F1LU69|F1LU69_RAT Ubiquitin B pseudogene 4 OS=Rattus norvegicus OX=10116 GN=Ubbp4 PE=4 SV=3	4	10	10	7	9	9	9	9	6	6	53.2	53.2	35.9	17.951	156	156;150;154;165	0	137.74	50	53.2	838180000	334410000	503770000	360980000	353070000	10	12	22				277	266;402;403;502;2176;2245;2246;2386;2620;2621	True;True;True;True;True;True;True;True;True;True	274;413;414;514;2212;2282;2283;2425;2664;2665	575;576;577;871;872;873;1073;1074;1075;4685;4686;4834;4835;4836;4837;5195;5196;5738;5739;5740;5741;5742;5743;5744	628;629;630;953;954;955;1176;1177;1178;5111;5112;5267;5268;5269;5270;5271;5680;5681;6249;6250;6251;6252;6253;6254;6255	629;953;955;1178;5112;5267;5271;5681;6249;6255
D3ZWX3;G3V9M5;Q9EQJ4-2;Q9EQJ4;G3V883;Q9EQJ4-3;Q9EQJ1	D3ZWX3;G3V9M5;Q9EQJ4-2;Q9EQJ4;G3V883;Q9EQJ4-3;Q9EQJ1	18;18;18;18;17;17;10	18;18;18;18;17;17;10	13;13;13;13;12;12;7	Zinc finger protein 384	Zfp384;Znf384	tr|D3ZWX3|D3ZWX3_RAT Zinc finger protein 384 OS=Rattus norvegicus OX=10116 GN=Zfp384 PE=1 SV=1;tr|G3V9M5|G3V9M5_RAT Zinc finger protein 384 OS=Rattus norvegicus OX=10116 GN=Zfp384 PE=1 SV=1;sp|Q9EQJ4-2|ZN384_RAT Isoform 2 of Zinc finger protein 384 OS=Ratt	7	18	18	13	11	17	11	17	9	12	36.6	36.6	29.4	61.477	565	565;581;563;579;520;518;397	0	173.84	24.1	35	824220000	151810000	672410000	244560000	413980000	13	25	38				149	73;74;258;259;934;936;937;1378;1419;1630;1657;1874;1904;1958;2205;2206;2378;2531	True;True;True;True;True;True;True;True;True;True;True;True;True;True;True;True;True;True	75;76;266;267;951;953;954;1398;1439;1657;1684;1902;1936;1990;2241;2242;2417;2574	163;164;165;166;167;168;169;561;562;563;564;1988;1989;1991;1992;1993;1994;1995;2947;2948;3022;3461;3524;3525;4009;4097;4098;4209;4210;4211;4732;4733;4734;4735;4736;4737;4738;5143;5530;5531	179;180;181;182;183;184;185;613;614;615;616;2131;2132;2134;2135;2136;2137;2138;3194;3195;3273;3740;3803;3804;4354;4457;4458;4575;4576;4577;5160;5161;5162;5163;5164;5165;5166;5615;6036;6037	180;184;614;616;2132;2136;2137;3195;3273;3740;3803;4354;4457;4575;5162;5166;5615;6036
B0BN99	B0BN99	19	19	18		Hmgb3	tr|B0BN99|B0BN99_RAT High mobility group box 3 OS=Rattus norvegicus OX=10116 GN=Hmgb3 PE=1 SV=1	1	19	19	18	18	13	18	13	17	12	63.5	63.5	61.5	22.985	200	200	0	162.96	63.5	51.5	791690000	501340000	290350000	478690000	241460000	21	14	35				89	373;451;454;468;715;958;1056;1117;1135;1457;1458;1459;1821;1822;1981;1982;2535;2536;2558	True;True;True;True;True;True;True;True;True;True;True;True;True;True;True;True;True;True;True	383;463;466;480;730;975;1074;1135;1153;1480;1481;1482;1849;1850;2014;2015;2578;2579;2601	820;978;979;982;1003;1516;1517;1518;1519;2034;2035;2036;2246;2247;2370;2371;2372;2412;2413;2414;2415;3096;3097;3098;3099;3891;3892;3893;3894;4267;4268;4269;4270;5536;5537;5585;5586	901;1076;1077;1080;1101;1643;1644;1645;1646;2180;2181;2182;2411;2412;2535;2536;2537;2538;2578;2579;2580;2581;3353;3354;3355;3356;4224;4225;4226;4227;4638;4639;4640;4641;6042;6043;6094;6095	901;1077;1080;1101;1646;2181;2411;2538;2579;3354;3355;3356;4224;4226;4638;4641;6042;6043;6094
A0A0G2JW88;Q5M7W5;Q5M7W5-2	A0A0G2JW88;Q5M7W5;Q5M7W5-2	26;18;15	26;18;15	26;18;15	Microtubule-associated protein 4	Map4	tr|A0A0G2JW88|A0A0G2JW88_RAT Microtubule-associated protein OS=Rattus norvegicus OX=10116 GN=Map4 PE=1 SV=1;sp|Q5M7W5|MAP4_RAT Microtubule-associated protein 4 OS=Rattus norvegicus OX=10116 GN=Map4 PE=1 SV=1;sp|Q5M7W5-2|MAP4_RAT Isoform 2 of Microtubule-as	3	26	26	26	21	20	21	20	21	20	11.9	11.9	11.9	233.39	2201	2201;1057;983	0	195.59	10.8	9.9	730580000	375570000	355000000	358320000	284780000	25	25	50				19	32;126;127;233;238;285;337;347;855;886;1170;1181;1188;1224;1579;1832;1992;1994;1995;2063;2320;2333;2389;2414;2466;2496	True;True;True;True;True;True;True;True;True;True;True;True;True;True;True;True;True;True;True;True;True;True;True;True;True;True	32;130;131;241;246;293;346;356;872;903;1188;1199;1206;1243;1605;1860;2025;2027;2028;2096;2359;2372;2428;2453;2506;2536	77;78;79;80;278;279;280;508;509;519;614;615;732;733;734;735;751;1829;1880;2518;2519;2538;2551;2552;2627;3359;3360;3918;3919;4294;4295;4296;4301;4302;4303;4433;4434;5000;5001;5002;5030;5031;5203;5268;5269;5270;5396;5455;5456	93;94;95;96;305;306;307;558;559;560;570;667;668;799;800;801;802;818;1969;2020;2722;2723;2742;2755;2756;2834;3630;3631;3632;3633;3634;4262;4263;4665;4666;4667;4672;4673;4674;4808;4809;5451;5452;5453;5484;5485;5688;5762;5763;5764;5897;5956;5957	93;305;307;558;570;667;802;818;1969;2020;2723;2742;2756;2834;3631;4263;4666;4672;4673;4809;5452;5484;5688;5763;5897;5957
P61314;D3ZF52	P61314	9;1	9;1	9;1	60S ribosomal protein L15	Rpl15	sp|P61314|RL15_RAT 60S ribosomal protein L15 OS=Rattus norvegicus OX=10116 GN=Rpl15 PE=1 SV=2	2	9	9	9	7	7	7	7	7	7	17.6	17.6	17.6	24.146	204	204;204	0	62.035	17.6	14.7	722500000	343500000	378990000	338590000	290530000	7	7	14				265	554;555;694;695;733;746;1577;1578;1784	True;True;True;True;True;True;True;True;True	567;568;709;710;748;761;1603;1604;1812	1177;1178;1179;1180;1473;1474;1551;1576;1577;3356;3357;3358;3802;3803	1283;1284;1285;1286;1600;1601;1678;1703;1704;3627;3628;3629;4125;4126	1284;1286;1600;1601;1678;1704;3628;3629;4125
F1LNF1;A7VJC2;F1LM82;A7VJC2-4;A7VJC2-2;A7VJC2-3	F1LNF1;A7VJC2;F1LM82;A7VJC2-4;A7VJC2-2;A7VJC2-3	11;10;9;9;9;8	11;10;9;9;9;8	11;10;9;9;9;8	Heterogeneous nuclear ribonucleoproteins A2/B1	Hnrnpa2b1	tr|F1LNF1|F1LNF1_RAT Heterogeneous nuclear ribonucleoproteins A2/B1 OS=Rattus norvegicus OX=10116 GN=Hnrnpa2b1 PE=1 SV=1;sp|A7VJC2|ROA2_RAT Heterogeneous nuclear ribonucleoproteins A2/B1 OS=Rattus norvegicus OX=10116 GN=Hnrnpa2b1 PE=1 SV=1;tr|F1LM82|F1LM82	6	11	11	11	11	10	11	10	11	10	38.1	38.1	38.1	37.297	352	352;353;301;313;341;301	0	154.17	38.1	30.1	704310000	467300000	237010000	462290000	183620000	16	14	30				180	160;643;650;673;681;1044;1545;1619;2256;2576;2577	True;True;True;True;True;True;True;True;True;True;True	165;656;664;688;696;1062;1571;1646;2293;2619;2620	357;358;359;360;1363;1364;1380;1381;1433;1434;1448;1449;2217;2218;3287;3288;3289;3290;3445;3446;4855;4856;5634;5635;5636;5637;5638;5639;5640	392;393;394;395;1485;1486;1504;1505;1558;1559;1573;1574;2378;2379;3557;3558;3559;3560;3561;3722;3723;5289;5290;6144;6145;6146;6147;6148;6149;6150	392;1486;1505;1559;1573;2379;3561;3722;5290;6144;6147
D3ZVI8	D3ZVI8	13	13	10		Klf13	tr|D3ZVI8|D3ZVI8_RAT Kruppel-like factor 13 OS=Rattus norvegicus OX=10116 GN=Klf13 PE=4 SV=1	1	13	13	10	3	13	3	13	3	10	58.8	58.8	45	14.561	131	131	0	107.24	16	58.8	665860000	38425000	627440000	34725000	476540000	3	15	18				147	527;581;585;586;676;827;891;892;1065;1066;1734;1840;2218	True;True;True;True;True;True;True;True;True;True;True;True;True	539;594;598;599;691;844;908;909;1083;1084;1761;1868;2255	1125;1230;1237;1238;1439;1767;1768;1769;1770;1889;1890;2266;2267;2268;3687;3688;3937;4772;4773	1231;1336;1343;1344;1564;1906;1907;1908;1909;2029;2030;2431;2432;2433;3990;3991;4282;5205;5206	1231;1336;1343;1344;1564;1909;2029;2030;2431;2432;3991;4282;5206
P52164-2;P52164;Q499S8	P52164-2;P52164	15;13;2	15;13;2	15;13;2	Protein max	Max	sp|P52164-2|MAX_RAT Isoform Short of Protein max OS=Rattus norvegicus OX=10116 GN=Max;sp|P52164|MAX_RAT Protein max OS=Rattus norvegicus OX=10116 GN=Max PE=1 SV=1	3	15	15	15	10	15	10	15	10	15	70.9	70.9	70.9	17.199	151	151;160;97	0	225.06	62.9	70.9	664460000	142790000	521670000	180190000	355730000	13	20	33				259	106;188;189;203;227;319;361;367;1517;1518;1664;1781;1857;1858;2095	True;True;True;True;True;True;True;True;True;True;True;True;True;True;True	109;194;195;210;235;327;371;377;1543;1544;1691;1809;1885;1886;2130	235;236;422;423;424;425;453;454;500;686;797;811;812;3223;3224;3225;3226;3227;3228;3229;3230;3231;3537;3538;3793;3975;3976;3977;3978;4511;4512;4513;4514	261;262;467;468;469;470;498;499;546;750;878;892;893;3490;3491;3492;3493;3494;3495;3496;3497;3498;3816;3817;4107;4320;4321;4322;4323;4892;4893;4894;4895	262;469;470;498;546;750;878;892;3493;3497;3816;4107;4321;4323;4894
F1M3H8	F1M3H8	10	10	10		Hnrnpa0	tr|F1M3H8|F1M3H8_RAT Hypothetical protein LOC681410 OS=Rattus norvegicus OX=10116 GN=LOC681410 PE=1 SV=3	1	10	10	10	9	5	9	5	9	5	31.2	31.2	31.2	30.076	301	301	0	78.898	31.2	20.9	660050000	527740000	132310000	456990000	170460000	13	6	19				195	246;249;556;557;558;653;654;1051;1246;1922	True;True;True;True;True;True;True;True;True;True	254;257;569;570;571;668;669;1069;1265;1954	529;530;531;532;539;540;1181;1182;1183;1388;1389;1390;2233;2234;2235;2236;2237;2663;4133;4134	580;581;582;583;590;591;1287;1288;1289;1512;1513;1514;2398;2399;2400;2401;2402;2870;4494;4495	580;590;1287;1288;1289;1512;1513;2400;2870;4495
Q9WUL0;A0A0G2K3V7	Q9WUL0;A0A0G2K3V7	25;24	25;24	25;24	DNA topoisomerase 1	Top1	sp|Q9WUL0|TOP1_RAT DNA topoisomerase 1 OS=Rattus norvegicus OX=10116 GN=Top1 PE=1 SV=1;tr|A0A0G2K3V7|A0A0G2K3V7_RAT DNA topoisomerase 1 OS=Rattus norvegicus OX=10116 GN=Top1 PE=1 SV=1	2	25	25	25	14	22	14	22	14	22	28	28	28	90.759	767	767;748	0	186.48	18.6	26.5	634690000	174820000	459870000	222050000	299320000	16	27	43				351	236;269;463;472;473;896;903;962;975;1013;1115;1195;1274;1338;1428;1429;1430;1575;1916;2034;2353;2460;2533;2623;2624	True;True;True;True;True;True;True;True;True;True;True;True;True;True;True;True;True;True;True;True;True;True;True;True;True	244;277;475;484;485;913;920;979;993;1031;1133;1213;1293;1357;1448;1449;1450;1601;1948;2067;2392;2500;2576;2667;2668	515;516;517;580;996;997;1011;1012;1013;1014;1894;1895;1896;1897;1914;2044;2045;2075;2076;2140;2365;2562;2708;2830;2831;2832;3042;3043;3044;3045;3046;3047;3354;4120;4121;4377;4378;5095;5381;5533;5747;5748;5749	566;567;568;633;1094;1095;1109;1110;1111;1112;2034;2035;2036;2037;2054;2190;2191;2221;2222;2297;2530;2766;2915;3042;3043;3044;3293;3294;3295;3296;3297;3298;3625;4481;4482;4748;4749;5567;5877;6039;6258;6259;6260	568;633;1095;1109;1112;2034;2054;2191;2221;2297;2530;2766;2915;3043;3294;3297;3298;3625;4481;4748;5567;5877;6039;6258;6260
Q62764;F1MA18	Q62764;F1MA18	28;25	17;14	7;7	Y-box-binding protein 3	Ybx3	sp|Q62764|YBOX3_RAT Y-box-binding protein 3 OS=Rattus norvegicus OX=10116 GN=Ybx3 PE=1 SV=1;tr|F1MA18|F1MA18_RAT Y-box-binding protein 3 OS=Rattus norvegicus OX=10116 GN=Ybx3 PE=1 SV=1	2	28	17	7	27	21	16	10	7	4	76.5	67.6	24.9	38.851	361	361;361	0	221.99	76.5	53.7	619120000	385320000	233800000	369000000	188860000	24	16	40				316	79;413;414;617;1446;1488;1489;1508;1509;1510;1548;1552;1588;1719;1731;1775;1862;2050;2051;2052;2094;2160;2161;2400;2432;2433;2446;2596	True;False;False;True;True;False;False;False;False;False;False;True;True;True;True;True;True;True;True;True;True;False;True;True;True;True;False;False	81;424;425;630;1468;1513;1514;1534;1535;1536;1574;1578;1615;1746;1758;1802;1890;2083;2084;2085;2129;2196;2197;2439;2472;2473;2486;2640	177;178;179;893;894;895;896;897;898;1304;1305;1306;1307;3074;3075;3076;3077;3156;3157;3158;3159;3160;3161;3162;3163;3164;3165;3166;3167;3201;3202;3203;3204;3205;3206;3207;3208;3209;3210;3211;3301;3302;3309;3382;3648;3649;3650;3651;3683;3778;3988;4408;4409;4410;4411;4509;4510;4648;4649;4650;4651;4652;4653;5217;5218;5310;5311;5312;5313;5314;5350;5351;5352;5353;5683;5684	194;195;196;197;198;978;979;980;981;982;983;1413;1414;1415;1416;1417;3330;3331;3332;3333;3334;3423;3424;3425;3426;3427;3428;3429;3430;3431;3432;3433;3434;3468;3469;3470;3471;3472;3473;3474;3475;3476;3477;3478;3572;3573;3580;3657;3934;3935;3936;3937;3986;4090;4333;4780;4781;4782;4783;4784;4890;4891;5051;5052;5053;5054;5055;5056;5057;5058;5702;5703;5804;5805;5806;5807;5808;5846;5847;5848;5849;6193;…	195;978;981;1416;3333;3425;3432;3469;3473;3478;3572;3580;3657;3934;3986;4090;4333;4781;4782;4784;4890;5051;5056;5702;5804;5808;5849;6193
P15865	P15865	21	3	3	Histone H1.4	Hist1h1e	sp|P15865|H14_RAT Histone H1.4 OS=Rattus norvegicus OX=10116 GN=Hist1h1e PE=1 SV=3	1	21	3	3	19	19	3	3	3	3	42.5	9.6	9.6	21.987	219	219	0	41.539	42.5	39.7	615250000	287460000	327790000	279130000	251240000	6	5	11				244	133;134;209;210;491;492;803;804;806;807;1037;1038;1045;1741;1882;1883;1884;1948;1949;2027;2028	False;False;False;False;False;False;False;False;False;False;False;False;False;False;True;True;True;False;False;False;False	137;138;216;217;503;504;819;820;822;823;1055;1056;1063;1768;1911;1912;1913;1914;1980;1981;2060;2061	292;293;294;295;296;297;465;466;467;1049;1050;1051;1052;1053;1054;1055;1696;1697;1698;1699;1700;1701;1702;1703;1705;1706;1707;1708;1709;2191;2192;2193;2194;2195;2196;2197;2198;2199;2200;2219;3701;3702;3703;3704;3705;4033;4034;4035;4036;4037;4038;4039;4040;4041;4042;4043;4188;4189;4190;4364;4365;4366	319;320;321;322;323;324;510;511;512;513;1152;1153;1154;1155;1156;1157;1158;1830;1831;1832;1833;1834;1835;1836;1837;1839;1840;1841;1842;1843;2352;2353;2354;2355;2356;2357;2358;2359;2360;2361;2380;2381;4004;4005;4006;4007;4008;4009;4010;4383;4384;4385;4386;4387;4388;4389;4390;4391;4392;4393;4554;4555;4556;4735;4736;4737	320;324;511;513;1152;1156;1833;1835;1840;1843;2354;2359;2381;4006;4384;4389;4393;4555;4556;4735;4736
P25886;F1LYI5;A0A0G2QC62;M0R665;F1LWX2;D4A888;F1M4V2;F1LSZ1;D4A883;D3ZWV1;A0A0G2K9E6;A0A0G2JT96;D3Z8Q4;F1M682;D3ZIV1;F1M577;D3ZY63;D3ZFF1	P25886;F1LYI5;A0A0G2QC62;M0R665	9;7;6;5;4;4;3;3;2;2;2;2;2;1;1;1;1;1	9;7;6;5;4;4;3;3;2;2;2;2;2;1;1;1;1;1	9;7;6;5;4;4;3;3;2;2;2;2;2;1;1;1;1;1	60S ribosomal protein L29	Rpl29;RGD1564138;LOC686807	sp|P25886|RL29_RAT 60S ribosomal protein L29 OS=Rattus norvegicus OX=10116 GN=Rpl29 PE=1 SV=3;tr|F1LYI5|F1LYI5_RAT 60S ribosomal protein L29 OS=Rattus norvegicus OX=10116 GN=RGD1564138 PE=3 SV=3;tr|A0A0G2QC62|A0A0G2QC62_RAT 60S ribosomal protein L29 OS=Rat	18	9	9	9	7	8	7	8	7	8	48.7	48.7	48.7	17.325	156	156;147;149;156;135;148;102;144;121;141;142;158;161;132;147;154;156;163	0	60.065	44.2	48.7	586960000	271910000	315050000	292150000	217180000	9	9	18				252	162;177;184;248;622;1211;1229;1505;2073	True;True;True;True;True;True;True;True;True	167;182;190;256;635;1230;1248;1531;2106	363;364;365;366;398;416;417;537;538;1318;2602;2603;2635;3194;3195;4452;4453	398;399;400;401;402;403;436;461;462;588;589;1430;2809;2810;2842;3461;3462;4829;4830	399;436;462;589;1430;2810;2842;3461;4830
P26801	P26801	9	9	9	CCAAT/enhancer-binding protein gamma	Cebpg	sp|P26801|CEBPG_RAT CCAAT/enhancer-binding protein gamma OS=Rattus norvegicus OX=10116 GN=Cebpg PE=1 SV=2	1	9	9	9	7	8	7	8	7	8	86	86	86	16.388	150	150	0	129.45	73.3	86	565120000	184440000	380670000	156310000	315010000	10	14	24				254	332;488;1168;1295;1340;1640;2122;2123;2463	True;True;True;True;True;True;True;True;True	341;500;1186;1314;1359;1667;2157;2158;2503	720;721;722;723;1044;1045;1046;2511;2512;2513;2750;2835;2836;2837;3490;4574;4575;4576;5386;5387;5388;5389;5390;5391	787;788;789;790;1147;1148;1149;2715;2716;2717;2957;3047;3048;3049;3050;3769;4964;4965;4966;5882;5883;5884;5885;5886;5887	789;1149;2715;2957;3050;3769;4964;4966;5887
Q4KMA2;Q5XFX7;A0A0G2K7M2	Q4KMA2	10;1;1	10;1;1	10;1;1	UV excision repair protein RAD23 homolog B	Rad23b	sp|Q4KMA2|RD23B_RAT UV excision repair protein RAD23 homolog B OS=Rattus norvegicus OX=10116 GN=Rad23b PE=1 SV=1	3	10	10	10	8	10	8	10	8	10	15.9	15.9	15.9	43.496	415	415;351;362	0	94.223	15.9	15.9	535010000	213400000	321610000	232440000	223320000	11	14	25				299	151;522;712;913;967;968;969;1502;2267;2268	True;True;True;True;True;True;True;True;True;True	156;534;727;930;985;986;987;1527;1528;2305;2306	338;339;340;1117;1118;1505;1506;1507;1508;1936;1937;2055;2056;2057;2058;2059;2060;2061;2062;3188;3189;3190;4878;4879;4880;4881;4882	371;372;373;1223;1224;1632;1633;1634;1635;2076;2077;2201;2202;2203;2204;2205;2206;2207;2208;3455;3456;3457;5312;5313;5314;5315;5316	373;1224;1632;2077;2201;2203;2206;3456;5312;5314	35	73
Q7TQ84;F1M0P3;A0A0G2K6Q7;A0A0G2JSV9	Q7TQ84;F1M0P3	9;7;2;2	9;7;2;2	9;7;2;2	UAP56-interacting factor	Fyttd1	sp|Q7TQ84|UIF_RAT UAP56-interacting factor OS=Rattus norvegicus OX=10116 GN=Fyttd1 PE=2 SV=2;tr|F1M0P3|F1M0P3_RAT UAP56-interacting factor OS=Rattus norvegicus OX=10116 GN=Fyttd1 PE=1 SV=2	4	9	9	9	9	7	9	7	9	7	24	24	24	35.642	317	317;284;152;189	0	76.656	24	22.4	526830000	328090000	198740000	307560000	170300000	13	9	22				335	551;1134;1359;1779;1785;1933;2317;2483;2534	True;True;True;True;True;True;True;True;True	564;1152;1378;1807;1813;1965;2356;2523;2577	1172;2409;2410;2411;2890;2891;3790;3791;3804;4155;4156;4157;4158;4994;4995;5423;5424;5425;5426;5534;5535	1278;2575;2576;2577;3135;3136;3137;4104;4105;4127;4518;4519;4520;4521;5445;5446;5924;5925;5926;5927;6040;6041	1278;2576;3137;4104;4127;4519;5446;5925;6040
P62275	P62275	5	5	5	40S ribosomal protein S29	Rps29	sp|P62275|RS29_RAT 40S ribosomal protein S29 OS=Rattus norvegicus OX=10116 GN=Rps29 PE=1 SV=2	1	5	5	5	5	4	5	4	5	4	67.9	67.9	67.9	6.6767	56	56	0	53.319	67.9	48.2	511460000	393570000	117890000	304600000	177810000	7	5	12				271	696;697;1614;2385;2564	True;True;True;True;True	711;712;1641;2424;2607	1475;1476;1477;1478;1479;1480;1481;3434;3435;3436;3437;5194;5598;5599	1602;1603;1604;1605;1606;1607;1608;3711;3712;3713;3714;5679;6107;6108	1605;1608;3712;5679;6108
Q6P6G9;Q5I0M7;P04256;D4ACJ7;F1M2S4;A0A0G2K3G4;F1M6C7	Q6P6G9;Q5I0M7;P04256	8;8;8;3;2;2;2	8;8;8;3;2;2;2	8;8;8;3;2;2;2	Heterogeneous nuclear ribonucleoprotein A1;Heterogeneous nuclear ribonucleoprotein A1, N-terminally processed	Hnrnpa1;Hnrpa1	tr|Q6P6G9|Q6P6G9_RAT Heterogeneous nuclear ribonucleoprotein A1 OS=Rattus norvegicus OX=10116 GN=Hnrnpa1 PE=1 SV=1;tr|Q5I0M7|Q5I0M7_RAT Heterogeneous nuclear ribonucleoprotein A1 OS=Rattus norvegicus OX=10116 GN=Hnrnpa1 PE=1 SV=1;sp|P04256|ROA1_RAT Heterog	7	8	8	8	7	6	7	6	7	6	24	24	24	33.619	313	313;320;320;255;158;206;236	0	73.441	23.6	23.3	507800000	338550000	169260000	324130000	141970000	11	7	18				237	408;409;1554;1555;1876;2109;2580;2581	True;True;True;True;True;True;True;True	419;420;1580;1581;1904;2144;2623;2624	887;888;3311;3312;3313;3314;4011;4012;4546;4547;4548;4549;5647;5648;5649;5650;5651	972;973;3582;3583;3584;3585;4356;4357;4934;4935;4936;4937;4938;6157;6158;6159;6160;6161	972;973;3584;3585;4357;4937;6159;6160
D3ZCR3;P63159;A0A0G2K6P4;D3ZXR5;D3ZC69;M0R7R5;D3ZGW6;F1LNG6;D3ZIU9;D4A6A9;D3ZLG3;A0A0G2K6M3;F1M4J9	D3ZCR3;P63159;A0A0G2K6P4;D3ZXR5;D3ZC69;M0R7R5;D3ZGW6;F1LNG6;D3ZIU9	16;16;15;14;11;11;10;10;8;6;5;4;3	15;15;14;13;10;10;9;9;7;6;5;3;2	12;12;12;10;7;8;8;7;6;6;5;3;2	High mobility group protein B1	Hmg1l1;Hmgb1;RGD1563668;LOC100911637;Hmgb1-ps3;RGD1560584	tr|D3ZCR3|D3ZCR3_RAT High-mobility group (nonhistone chromosomal) protein 1-like 1 OS=Rattus norvegicus OX=10116 GN=LOC108349189 PE=4 SV=2;sp|P63159|HMGB1_RAT High mobility group protein B1 OS=Rattus norvegicus OX=10116 GN=Hmgb1 PE=1 SV=2;tr|A0A0G2K6P4|A0A	13	16	15	12	14	14	13	13	10	11	54	51.2	38	24.677	213	213;215;214;214;211;213;212;231;214;178;206;137;175	0	124.72	53.5	45.1	503090000	264010000	239080000	247110000	197070000	14	16	30				123	445;453;568;716;717;871;953;954;1056;1090;1091;1118;1253;1465;1466;2352	True;True;True;True;True;True;True;True;False;True;True;True;True;True;True;True	457;465;581;731;732;888;970;971;1074;1108;1109;1136;1272;1489;1490;2391	966;967;968;981;1212;1520;1521;1522;1523;1850;1851;2023;2024;2025;2026;2027;2028;2246;2247;2317;2318;2319;2373;2374;2375;2376;2675;3107;3108;3109;3110;5092;5093;5094	1064;1065;1066;1079;1318;1647;1648;1649;1650;1990;1991;2169;2170;2171;2172;2173;2174;2411;2412;2482;2483;2484;2539;2540;2541;2542;2882;3364;3365;3366;3367;5564;5565;5566	1066;1079;1318;1648;1649;1991;2169;2174;2411;2482;2484;2541;2882;3365;3367;5566
M0R953;M0R5I3;Q66H40	M0R953;M0R5I3;Q66H40	5;4;4	5;4;4	5;4;4	High mobility group nucleosome-binding domain-containing protein 3	Hmgn3	tr|M0R953|M0R953_RAT High mobility group nucleosome-binding domain-containing protein 3 OS=Rattus norvegicus OX=10116 GN=Hmgn3 PE=1 SV=1;tr|M0R5I3|M0R5I3_RAT High mobility group nucleosomal binding domain 3, isoform CRA_a OS=Rattus norvegicus OX=10116 GN=H	3	5	5	5	2	5	2	5	2	5	34.7	34.7	34.7	13.29	124	124;96;95	0	34.152	14.5	34.7	500450000	221400000	279050000	226870000	204830000	3	7	10				228	1325;1351;1352;2058;2153	True;True;True;True;True	1344;1370;1371;2091;2189	2810;2879;2880;2881;2882;2883;4421;4422;4639;4640	3022;3124;3125;3126;3127;3128;4795;4796;5042;5043	3022;3124;3126;4796;5043
Q76MX4-2;Q76MX4	Q76MX4-2;Q76MX4	12;11	12;11	9;8	Transcription factor MafG	Mafg	sp|Q76MX4-2|MAFG_RAT Isoform 2 of Transcription factor MafG OS=Rattus norvegicus OX=10116 GN=Mafg;sp|Q76MX4|MAFG_RAT Transcription factor MafG OS=Rattus norvegicus OX=10116 GN=Mafg PE=2 SV=2	2	12	12	9	8	11	8	11	7	8	66.7	66.7	54.9	17.876	162	162;189	0	122.03	40.7	66	473350000	92726000	380620000	149240000	230320000	9	17	26				334	459;741;742;1561;1716;1809;1996;2064;2260;2355;2427;2506	True;True;True;True;True;True;True;True;True;True;True;True	471;756;757;1587;1743;1837;2029;2097;2297;2394;2466;2547	991;1565;1566;1567;1568;1569;1570;3327;3328;3329;3644;3645;3864;4304;4305;4435;4862;5098;5099;5296;5297;5298;5472;5473;5474;5475	1089;1692;1693;1694;1695;1696;1697;3598;3599;3600;3930;3931;4193;4675;4676;4810;5296;5570;5571;5790;5791;5792;5973;5974;5975;5976	1089;1694;1695;3599;3931;4193;4675;4810;5296;5571;5792;5975
P62856;D3Z8D7;A0A0G2K743;A0A0G2JY64;A0A0G2JVP7	P62856	5;1;1;1;1	5;1;1;1;1	5;1;1;1;1	40S ribosomal protein S26	Rps26	sp|P62856|RS26_RAT 40S ribosomal protein S26 OS=Rattus norvegicus OX=10116 GN=Rps26 PE=3 SV=3	5	5	5	5	4	4	4	4	4	4	21.7	21.7	21.7	13.015	115	115;115;115;115;115	0	31.68	13.9	16.5	467950000	216090000	251860000	222030000	183860000	4	4	8				275	699;700;771;1085;1522	True;True;True;True;True	714;715;787;1103;1548	1483;1484;1485;1631;1632;2308;2309;3238	1610;1611;1612;1761;1762;2473;2474;3505	1611;1612;1762;2473;3505
D3ZIF0	D3ZIF0	11	11	11		Zfp512	tr|D3ZIF0|D3ZIF0_RAT Zinc finger protein 512 OS=Rattus norvegicus OX=10116 GN=Zfp512 PE=1 SV=1	1	11	11	11	7	10	7	10	7	10	24.4	24.4	24.4	63.958	562	562	0	87.608	11.9	21.7	437460000	250480000	186980000	233980000	157410000	10	11	21				132	76;82;86;194;1250;1251;1317;1318;2203;2426;2480	True;True;True;True;True;True;True;True;True;True;True	78;84;88;201;1269;1270;1336;1337;2239;2465;2520	172;184;189;190;435;436;437;2668;2669;2670;2671;2672;2790;2791;2792;2793;2794;2795;4730;5295;5420	188;203;209;210;480;481;482;2875;2876;2877;2878;2879;3000;3001;3002;3003;3004;3005;5158;5789;5921	188;203;210;480;2876;2879;3000;3005;5158;5789;5921
M0RDD7;Q498T2-2;Q498T2	M0RDD7;Q498T2-2;Q498T2	8;6;6	8;6;6	8;6;6	Chromatin target of PRMT1 protein	Chtop	tr|M0RDD7|M0RDD7_RAT Chromatin target of PRMT1-like 1 OS=Rattus norvegicus OX=10116 GN=Chtopl1 PE=4 SV=1;sp|Q498T2-2|CHTOP_RAT Isoform 2 of Chromatin target of PRMT1 protein OS=Rattus norvegicus OX=10116 GN=Chtop;sp|Q498T2|CHTOP_RAT Chromatin target of PRM	3	8	8	8	8	6	8	6	8	6	34.5	34.5	34.5	22.136	203	203;202;248	0	100.35	34.5	30	434110000	240860000	193250000	238030000	147080000	10	8	18				232	30;214;481;1216;1217;1529;1753;2519	True;True;True;True;True;True;True;True	30;221;222;493;1235;1236;1555;1780;2562	74;473;474;475;476;477;1029;1030;2613;2614;2615;2616;3249;3250;3732;3733;5513;5514	90;519;520;521;522;523;1129;1130;2820;2821;2822;2823;3516;3517;4041;4042;6019;6020	90;522;1129;2821;2823;3516;4041;6019	23	41
Q923W4	Q923W4	9	7	7	Hepatoma-derived growth factor-related protein 3	Hdgfrp3	sp|Q923W4|HDGR3_RAT Hepatoma-derived growth factor-related protein 3 OS=Rattus norvegicus OX=10116 GN=Hdgfl3 PE=1 SV=1	1	9	7	7	6	8	5	6	5	6	29.7	24.8	24.8	22.446	202	202	0	109.69	25.2	29.7	412700000	216910000	195790000	215270000	149190000	6	7	13				342	77;520;521;657;822;1077;1421;1580;1745	True;True;True;True;False;True;False;True;True	79;532;533;672;838;1095;1441;1606;1772	173;174;1112;1113;1114;1115;1116;1398;1749;2293;2294;3024;3025;3026;3027;3361;3362;3715	189;190;1218;1219;1220;1221;1222;1523;1886;2458;2459;3275;3276;3277;3278;3635;3636;4023	189;1219;1222;1523;1886;2458;3275;3636;4023
G3V6Y9;O55035	G3V6Y9;O55035	5;5	5;5	5;5	Peptidyl-prolyl cis-trans isomerase G	Ppig	tr|G3V6Y9|G3V6Y9_RAT Peptidyl-prolyl cis-trans isomerase G OS=Rattus norvegicus OX=10116 GN=Ppig PE=1 SV=1;sp|O55035|PPIG_RAT Peptidyl-prolyl cis-trans isomerase G OS=Rattus norvegicus OX=10116 GN=Ppig PE=1 SV=2	2	5	5	5	3	5	3	5	3	5	2.8	2.8	2.8	88.318	752	752;752	0	35.447	1.9	2.8	409010000	179160000	229850000	182470000	169900000	8	10	18				212	955;1790;1791;1893;1894	True;True;True;True;True	972;1818;1819;1925;1926	2029;3817;3818;3819;3820;3821;3822;3823;3824;4072;4073;4074;4075;4076	2175;4141;4142;4143;4144;4145;4146;4147;4148;4149;4150;4427;4428;4429;4430;4431;4432;4433	2175;4141;4150;4427;4431
Q63158;D3ZQL2	Q63158	14;4	11;2	10;1		Sp4	tr|Q63158|Q63158_RAT RCG21090 OS=Rattus norvegicus OX=10116 GN=Sp4 PE=2 SV=1	2	14	11	10	1	14	0	11	0	10	19.8	17.4	17	81.983	783	783;504	0	113.95	1.1	19.8	391780000	0	391780000	0	295250000	0	17	17				320	580;604;1021;1078;1717;1718;1722;1849;1859;2230;2238;2315;2357;2527	True;False;True;True;True;True;False;True;True;True;True;True;True;False	593;617;1039;1096;1744;1745;1749;1877;1887;2267;2275;2354;2396;2570	1228;1229;1275;1276;1277;2157;2158;2295;2296;3646;3647;3662;3663;3961;3962;3979;3980;4792;4816;4992;5102;5526	1334;1335;1381;1382;1383;2314;2315;2460;2461;3932;3933;3965;3966;4306;4307;4324;4325;5225;5249;5442;5443;5574;6032	1335;1381;2315;2460;3932;3933;3965;4306;4325;5225;5249;5442;5574;6032
Q4KLJ0	Q4KLJ0	5	5	1		LOC100360316	tr|Q4KLJ0|Q4KLJ0_RAT High mobility group nucleosomal binding domain 2 OS=Rattus norvegicus OX=10116 GN=LOC100360316 PE=1 SV=1	1	5	5	1	3	5	3	5	1	1	51.1	51.1	25.6	9.3785	90	90	0	46.481	48.9	51.1	385680000	130470000	255210000	153930000	168870000	3	6	9				297	41;1324;1591;1592;2420	True;True;True;True;True	41;1343;1618;1619;2459	96;97;2807;2808;2809;3387;3388;5280;5281	112;113;3019;3020;3021;3662;3663;5774;5775	113;3021;3662;3663;5774
D3ZJ29	D3ZJ29	20	20	20		Zfp512b	tr|D3ZJ29|D3ZJ29_RAT Uridine kinase-like 1 (Predicted) OS=Rattus norvegicus OX=10116 GN=Zfp512b PE=4 SV=1	1	20	20	20	16	17	16	17	16	17	29.6	29.6	29.6	96.153	875	875	0	162.84	22.9	27	385520000	163530000	221990000	160590000	170230000	17	19	36				135	12;81;87;105;111;396;399;427;428;698;731;867;1068;1870;1871;1977;2065;2221;2434;2435	True;True;True;True;True;True;True;True;True;True;True;True;True;True;True;True;True;True;True;True	12;83;89;108;114;407;410;438;439;713;746;884;1086;1898;1899;2010;2098;2258;2474;2475	27;28;182;183;191;192;234;249;250;858;859;860;866;867;924;925;926;927;1482;1546;1547;1548;1549;1845;2271;2272;2273;2274;4003;4004;4259;4436;4437;4777;4778;5315;5316;5317	42;43;201;202;211;212;260;276;277;940;941;942;948;949;1011;1012;1013;1014;1609;1673;1674;1675;1676;1985;2436;2437;2438;2439;4348;4349;4630;4811;4812;5210;5211;5809;5810;5811	43;201;212;260;277;941;949;1012;1013;1609;1675;1985;2437;4348;4349;4630;4812;5211;5809;5811
P43278	P43278	10	10	10	Histone H1.0;Histone H1.0, N-terminally processed	H1f0	sp|P43278|H10_RAT Histone H1.0 OS=Rattus norvegicus OX=10116 GN=H1f0 PE=2 SV=2	1	10	10	10	10	8	10	8	10	8	40.2	40.2	40.2	20.885	194	194	0	87.23	40.2	35.1	368570000	206690000	161880000	181890000	146790000	11	8	19				256	810;1364;1687;1760;1963;2141;2142;2201;2202;2404	True;True;True;True;True;True;True;True;True;True	826;1383;1714;1787;1995;2176;2177;2237;2238;2443	1716;1717;2902;2903;2904;3575;3744;3745;4230;4231;4616;4617;4618;4726;4727;4728;4729;5247;5248	1850;1851;3149;3150;3151;3857;4053;4054;4596;4597;5017;5018;5019;5154;5155;5156;5157;5741;5742	1851;3149;3857;4054;4596;5017;5019;5155;5157;5742
F1M8W4;A0A0G2K6K9;Q5U1X4;A0A096MJQ6;D4A8S0	F1M8W4;A0A0G2K6K9;Q5U1X4	19;18;10;1;1	19;18;10;1;1	17;16;9;0;0		Sox5	tr|F1M8W4|F1M8W4_RAT SRY box 5 OS=Rattus norvegicus OX=10116 GN=Sox5 PE=1 SV=2;tr|A0A0G2K6K9|A0A0G2K6K9_RAT SRY box 5 OS=Rattus norvegicus OX=10116 GN=Sox5 PE=1 SV=1;tr|Q5U1X4|Q5U1X4_RAT SRY box 5 OS=Rattus norvegicus OX=10116 GN=Sox5 PE=1 SV=1	5	19	19	17	19	6	19	6	17	5	20.7	20.7	20.7	83.97	763	763;679;392;595;612	0	141.18	20.7	7.2	345760000	289440000	56321000	266700000	59430000	23	7	30				200	171;791;921;980;1088;1434;1672;1674;1675;1677;1684;1685;1795;1796;1978;2186;2309;2494;2495	True;True;True;True;True;True;True;True;True;True;True;True;True;True;True;True;True;True;True	176;807;938;998;1106;1454;1699;1701;1702;1704;1711;1712;1823;1824;2011;2222;2348;2534;2535	386;1673;1674;1954;1955;2086;2087;2314;3053;3054;3550;3551;3554;3555;3557;3570;3571;3572;3830;3831;3832;3833;3834;3835;4260;4703;4981;5451;5452;5453;5454	423;1807;1808;2097;2098;2232;2233;2479;3304;3305;3830;3831;3834;3835;3837;3852;3853;3854;4156;4157;4158;4159;4160;4161;4631;5130;5431;5952;5953;5954;5955	423;1807;2097;2232;2479;3304;3830;3834;3835;3837;3852;3854;4157;4160;4631;5130;5431;5953;5955
P62268;F1LTW8;D4A9Q3	P62268;F1LTW8	9;5;3	9;5;3	9;5;3	40S ribosomal protein S23	Rps23;RGD1563705	sp|P62268|RS23_RAT 40S ribosomal protein S23 OS=Rattus norvegicus OX=10116 GN=Rps23 PE=1 SV=3;tr|F1LTW8|F1LTW8_RAT Similar to ribosomal protein S23 OS=Rattus norvegicus OX=10116 GN=RGD1563705 PE=3 SV=2	3	9	9	9	7	9	7	9	7	9	35	35	35	15.807	143	143;143;143	0	70.502	33.6	35	340760000	130740000	210020000	133520000	155490000	8	10	18				270	107;108;175;351;352;1036;2368;2468;2469	True;True;True;True;True;True;True;True;True	110;111;180;360;361;1054;2407;2508;2509	237;238;239;240;241;393;394;395;396;759;760;761;762;2190;5120;5121;5399;5400;5401	263;264;265;266;267;268;431;432;433;434;826;827;828;829;2351;5592;5593;5900;5901;5902	264;268;432;827;828;2351;5592;5900;5902
D4ABT8	D4ABT8	19	19	19		Hnrnpul2	tr|D4ABT8|D4ABT8_RAT Heterogeneous nuclear ribonucleoprotein U-like 2 OS=Rattus norvegicus OX=10116 GN=Hnrnpul2 PE=1 SV=1	1	19	19	19	4	18	4	18	4	18	30.9	30.9	30.9	84.858	745	745	0	141.44	5.1	29.8	330900000	24889000	306010000	24889000	230610000	4	23	27				174	153;174;260;339;612;725;737;1001;1306;1363;1420;1498;1590;1706;2079;2499;2500;2522;2602	True;True;True;True;True;True;True;True;True;True;True;True;True;True;True;True;True;True;True	158;179;268;348;625;740;752;1019;1325;1382;1440;1523;1617;1733;2112;2539;2540;2565;2646	342;343;392;565;737;1291;1292;1537;1557;2124;2771;2900;2901;3023;3180;3385;3386;3616;4463;4464;5460;5461;5517;5696;5697	375;376;429;430;617;804;1399;1400;1664;1684;2278;2979;3146;3147;3148;3274;3447;3660;3661;3898;4840;4841;5961;5962;6023;6206;6207	376;429;617;804;1400;1664;1684;2278;2979;3147;3274;3447;3661;3898;4841;5961;5962;6023;6206
A0A0G2JUX5;Q68A21;D3ZYS1	A0A0G2JUX5;Q68A21	14;12;1	14;12;1	9;7;1	Transcriptional activator protein Pur-beta	Purb	tr|A0A0G2JUX5|A0A0G2JUX5_RAT Transcriptional activator protein Pur-beta OS=Rattus norvegicus OX=10116 GN=Purb PE=1 SV=1;sp|Q68A21|PURB_RAT Transcriptional activator protein Pur-beta OS=Rattus norvegicus OX=10116 GN=Purb PE=1 SV=3	3	14	14	9	9	12	9	12	7	8	36.9	36.9	27.8	33.532	317	317;315;351	0	139.24	27.1	31.5	323380000	91983000	231400000	99040000	167330000	9	12	21				16	42;152;540;611;671;674;675;894;994;1203;1754;1866;1867;2541	True;True;True;True;True;True;True;True;True;True;True;True;True;True	42;157;553;624;686;689;690;911;1012;1221;1781;1894;1895;2584	98;99;341;1150;1151;1290;1428;1429;1435;1436;1437;1438;1892;2110;2582;3734;3997;3998;3999;5546;5547	114;115;374;1256;1257;1398;1553;1554;1560;1561;1562;1563;2032;2263;2787;4043;4342;4343;4344;6052;6053	114;374;1256;1398;1553;1561;1563;2032;2263;2787;4043;4343;4344;6053
A0A0G2K610;D3ZG44;D4A4V3;D3ZGU0;A0A0G2K3E5;A0A0G2JVQ6;A0A0G2K378;F1LNE0;F1LWY5;A0A0G2K4R3;A0A0G2K9M2;Q5FVJ1;F1M4T8;A0A0G2K5N3;B1WBX4;D4A514;M0RA93;A0A0G2K9E2;M0RCQ9;F1LTY6;A0A0G2K9T7;D4ADL6;A0A0G2QC13;F1M4D5;M0R8G4;A0A0G2K5Q4;A0A0G2K8H5;Q498N6;D3ZYI6;G3V609;F1LNL6;A0A096MKA8;D3ZY01;M0RBY6;F1LT76;A0A0G2K0R0;A0A0G2KA56;A0A0G2JWH7;D4A7G1;Q62886;A0A0G2K8T1;D3ZYY3;A0A0G2JUV0;D3ZQ68;F7FNT9;E9PTG0;Q99PJ…	A0A0G2K610;D3ZG44	15;15;5;2;1;1;1;1;1;1;1;1;1;1;1;1;1;1;1;1;1;1;1;1;1;1;1;1;1;1;1;1;1;1;1;1;1;1;1;1;1;1;1;1;1;1;1;1;1;1;1;1;1;1;1;1;1;1;1;1	15;15;5;2;1;1;1;1;1;1;1;1;1;1;1;1;1;1;1;1;1;1;1;1;1;1;1;1;1;1;1;1;1;1;1;1;1;1;1;1;1;1;1;1;1;1;1;1;1;1;1;1;1;1;1;1;1;1;1;1	13;13;3;1;0;0;0;0;0;0;0;0;0;0;0;0;0;0;0;0;0;0;0;0;0;0;0;0;0;0;0;0;0;0;0;0;0;0;0;0;0;0;0;0;0;0;0;0;0;0;0;0;0;0;0;0;0;0;0;0		Klf12	tr|A0A0G2K610|A0A0G2K610_RAT Kruppel-like factor 12 OS=Rattus norvegicus OX=10116 GN=Klf12 PE=1 SV=1;tr|D3ZG44|D3ZG44_RAT Kruppel-like factor 12 OS=Rattus norvegicus OX=10116 GN=Klf12 PE=1 SV=3	60	15	15	13	7	13	7	13	7	11	26.4	26.4	24.1	44.224	402	402;419;344;355;364;368;373;408;410;421;437;447;455;455;461;464;465;472;473;475;487;495;497;500;501;520;534;536;547;560;568;576;590;604;605;616;623;628;643;650;653;664;664;680;690;723;733;736;755;762;776;812;866;932;1031;1039;283;536;560;568	0	113.28	17.9	22.6	319210000	53321000	265890000	74806000	178890000	9	14	23				52	247;261;268;524;528;883;932;933;1095;1737;1848;1909;2113;2236;2237	True;True;True;True;True;True;True;True;True;True;True;True;True;True;True	255;269;276;536;540;900;949;950;1113;1764;1876;1941;2148;2273;2274	533;534;535;536;566;579;1121;1126;1127;1873;1981;1982;1983;1984;1985;1986;1987;2323;3693;3960;4106;4107;4108;4557;4813;4814;4815	584;585;586;587;618;632;1227;1232;1233;2013;2124;2125;2126;2127;2128;2129;2130;2488;3996;4305;4467;4468;4469;4946;5246;5247;5248	584;618;632;1227;1233;2013;2126;2130;2488;3996;4305;4468;4946;5246;5248
Q6URK4-2;D4A6A2;E9PSU5	Q6URK4-2;D4A6A2;E9PSU5	10;9;8	10;9;8	2;2;2	Heterogeneous nuclear ribonucleoprotein A3	Hnrnpa3	sp|Q6URK4-2|ROA3_RAT Isoform 2 of Heterogeneous nuclear ribonucleoprotein A3 OS=Rattus norvegicus OX=10116 GN=Hnrnpa3;tr|D4A6A2|D4A6A2_RAT Heterogeneous nuclear ribonucleoprotein A3 OS=Rattus norvegicus OX=10116 GN=Hnrnpa3 PE=1 SV=3;tr|E9PSU5|E9PSU5_RAT Un	3	10	10	2	7	10	7	10	2	2	23.8	23.8	3.9	37.086	357	357;356;356	0	164.74	21.3	23.8	306310000	141210000	165100000	125010000	140620000	8	11	19				333	410;411;412;914;1384;1385;2110;2563;2578;2579	True;True;True;True;True;True;True;True;True;True	421;422;423;931;1404;1405;2145;2606;2621;2622	889;890;891;892;1938;2955;2956;2957;2958;4550;4551;4552;5596;5597;5641;5642;5643;5644;5645;5646	974;975;976;977;2078;3202;3203;3204;3205;4939;4940;4941;6105;6106;6151;6152;6153;6154;6155;6156	974;976;977;2078;3202;3205;4939;6106;6152;6156
P62986;F1LML2;P0CG51;Q63429	P62986;F1LML2;P0CG51;Q63429	6;3;3;3	3;0;0;0	3;0;0;0	Ubiquitin-60S ribosomal protein L40;Ubiquitin;60S ribosomal protein L40;Polyubiquitin-B;Ubiquitin;Polyubiquitin-C;Ubiquitin;Ubiquitin-related	Uba52;Ubc;Ubb	sp|P62986|RL40_RAT Ubiquitin-60S ribosomal protein L40 OS=Rattus norvegicus OX=10116 GN=Uba52 PE=1 SV=2;tr|F1LML2|F1LML2_RAT Polyubiquitin-C OS=Rattus norvegicus OX=10116 GN=Ubc PE=4 SV=1;sp|P0CG51|UBB_RAT Polyubiquitin-B OS=Rattus norvegicus OX=10116 GN=U	4	6	3	3	6	6	3	3	3	3	37.5	16.4	16.4	14.728	128	128;810;305;810	0	32.012	37.5	37.5	303220000	120080000	183140000	128680000	129410000	3	4	7				278	283;502;1055;1651;2245;2246	True;False;True;True;False;False	291;514;1073;1678;2282;2283	608;609;610;1073;1074;1075;2244;2245;3510;3511;4834;4835;4836;4837	661;662;663;1176;1177;1178;2409;2410;3789;3790;5267;5268;5269;5270;5271	661;1178;2409;3789;5267;5271
F1LQ14;D4A4W9;B2RZD4;P11250	F1LQ14;D4A4W9;B2RZD4;P11250	4;4;4;3	4;4;4;3	4;4;4;3	60S ribosomal protein L34	Rpl34;Rpl34-ps1	tr|F1LQ14|F1LQ14_RAT 60S ribosomal protein L34 OS=Rattus norvegicus OX=10116 GN=Rpl34 PE=4 SV=1;tr|D4A4W9|D4A4W9_RAT Ribosomal protein L34, pseudogene 1 OS=Rattus norvegicus OX=10116 GN=Rpl34-ps1 PE=4 SV=1;tr|B2RZD4|B2RZD4_RAT 60S ribosomal protein L34 OS=	4	4	4	4	3	4	3	4	3	4	18.1	18.1	18.1	13.369	116	116;117;117;117	0	38.271	10.3	18.1	299550000	145420000	154140000	150880000	110700000	5	5	10				99	1344;1345;1757;1814	True;True;True;True	1363;1364;1784;1842	2848;2849;2850;2851;2852;2853;3738;3739;3740;3875	3063;3064;3065;3066;3067;3068;4047;4048;4049;4204	3063;3068;4049;4204
A0A0G2JU73	A0A0G2JU73	11	11	1			tr|A0A0G2JU73|A0A0G2JU73_RAT E3 ubiquitin-protein ligase TRIP12 OS=Rattus norvegicus OX=10116 GN=Trip12 PE=1 SV=1	1	11	11	1	9	10	9	10	1	1	7.9	7.9	0.5	225.61	2038	2038	0	182.75	7.1	7.7	296140000	133200000	162940000	132150000	123850000	10	11	21				12	67;75;858;1154;1370;1569;1839;1895;2048;2072;2472	True;True;True;True;True;True;True;True;True;True;True	69;77;875;1172;1389;1595;1867;1927;2081;2105;2512	150;151;152;153;170;171;1833;1834;2480;2913;2914;3340;3341;3935;3936;4077;4405;4406;4451;5406;5407	166;167;168;169;186;187;1973;1974;2681;3160;3161;3611;3612;4280;4281;4434;4777;4778;4828;5907;5908	169;186;1973;2681;3161;3611;4280;4434;4777;4828;5908
O35410	O35410	13	8	8		Usf1	tr|O35410|O35410_RAT Transcription factor USF-1 OS=Rattus norvegicus OX=10116 GN=Usf1 PE=1 SV=1	1	13	8	8	2	13	1	8	1	8	31.3	24.2	24.2	33.57	310	310	0	71.07	7.7	31.3	288390000	9264600	279130000	9264600	210350000	1	10	11				234	187;328;849;948;979;1329;1710;1863;2200;2226;2228;2229;2615	False;False;True;True;False;True;False;True;True;False;True;True;True	193;336;866;965;997;1348;1737;1891;2236;2263;2265;2266;2659	420;421;704;705;1812;2013;2085;2819;3626;3989;4725;4784;4788;4789;4790;4791;5730	465;466;771;772;1952;2158;2159;2231;3031;3910;4334;5153;5217;5221;5222;5223;5224;6241	466;772;1952;2158;2231;3031;3910;4334;5153;5217;5223;5224;6241
Q6P747;F1M6V1;A0A096MJ10;A0A096MKG6	Q6P747;F1M6V1;A0A096MJ10	9;8;5;3	9;8;5;3	9;8;5;3	Heterochromatin protein 1-binding protein 3	Hp1bp3	sp|Q6P747|HP1B3_RAT Heterochromatin protein 1-binding protein 3 OS=Rattus norvegicus OX=10116 GN=Hp1bp3 PE=1 SV=1;tr|F1M6V1|F1M6V1_RAT Heterochromatin protein 1-binding protein 3 OS=Rattus norvegicus OX=10116 GN=Hp1bp3 PE=1 SV=3;tr|A0A096MJ10|A0A096MJ10_RA	4	9	9	9	7	5	7	5	7	5	12.7	12.7	12.7	60.806	553	553;553;228;294	0	53.9	10.5	7.8	279250000	147880000	131360000	108690000	138190000	6	5	11				331	394;395;460;728;766;1059;1086;1915;2242	True;True;True;True;True;True;True;True;True	405;406;472;743;782;1077;1104;1947;2279	855;856;857;992;1542;1618;1619;2250;2310;4119;4824;4825	937;938;939;1090;1669;1748;1749;2415;2475;4480;5257;5258	938;939;1090;1669;1749;2415;2475;4480;5258
Q9R1S9	Q9R1S9	6	6	6	Midkine	Mdk	sp|Q9R1S9|MK_RAT Midkine OS=Rattus norvegicus OX=10116 GN=Mdk PE=2 SV=1	1	6	6	6	6	6	6	6	6	6	38.6	38.6	38.6	15.406	140	140	0	74.757	38.6	38.6	271850000	131760000	140090000	131850000	105480000	9	8	17				350	205;418;931;2585;2600;2601	True;True;True;True;True;True	212;429;948;2629;2644;2645	459;460;907;908;1977;1978;1979;1980;5658;5659;5660;5690;5691;5692;5693;5694;5695	504;505;993;994;2120;2121;2122;2123;6168;6169;6170;6200;6201;6202;6203;6204;6205	505;994;2122;6169;6200;6204
D3ZJ19	D3ZJ19	11	11	8	DNA-binding protein SATB	Satb2	tr|D3ZJ19|D3ZJ19_RAT DNA-binding protein SATB OS=Rattus norvegicus OX=10116 GN=Satb2 PE=3 SV=1	1	11	11	8	11	5	11	5	8	5	15.7	15.7	13.2	82.586	733	733	0	109.94	15.7	7.6	262700000	212040000	50660000	199110000	51106000	15	7	22				134	132;1024;1242;1453;1533;1942;2038;2039;2273;2376;2493	True;True;True;True;True;True;True;True;True;True;True	136;1042;1261;1475;1476;1559;1974;2071;2072;2311;2415;2533	291;2161;2655;2656;3088;3089;3090;3091;3092;3261;3262;4172;4384;4385;4386;4387;4388;4389;4891;5139;5140;5450	318;2318;2862;2863;3345;3346;3347;3348;3349;3528;3529;4535;4756;4757;4758;4759;4760;4761;5325;5611;5612;5951	318;2318;2862;3345;3528;4535;4756;4760;5325;5611;5951	12	568
F1LV13;F1M3D3;Q62826;Q62826-2	F1LV13;F1M3D3;Q62826;Q62826-2	10;10;9;8	10;10;9;8	10;10;9;8	Heterogeneous nuclear ribonucleoprotein M	Hnrnpm	tr|F1LV13|F1LV13_RAT Heterogeneous nuclear ribonucleoprotein M OS=Rattus norvegicus OX=10116 GN=Hnrnpm PE=1 SV=1;tr|F1M3D3|F1M3D3_RAT Heterogeneous nuclear ribonucleoprotein M OS=Rattus norvegicus OX=10116 GN=Hnrnpm PE=1 SV=1;sp|Q62826|HNRPM_RAT Heterogene	4	10	10	10	9	7	9	7	9	7	20	20	20	73.721	690	690;729;690;535	0	63.666	18.3	13.5	256860000	90190000	166670000	88154000	127640000	9	8	17				188	550;753;1397;1398;1399;1400;1401;1402;1627;2421	True;True;True;True;True;True;True;True;True;True	563;768;1417;1418;1419;1420;1421;1422;1654;2460	1170;1171;1588;2986;2987;2988;2989;2990;2991;2992;2993;2994;2995;3457;3458;5282	1276;1277;1715;3236;3237;3238;3239;3240;3241;3242;3243;3244;3245;3246;3736;3737;5776	1277;1715;3236;3240;3242;3243;3244;3245;3737;5776
M0R7B4	M0R7B4	21	3	3		LOC684828	tr|M0R7B4|M0R7B4_RAT RCG45259 OS=Rattus norvegicus OX=10116 GN=Hist1h1d PE=1 SV=2	1	21	3	3	20	18	3	3	3	3	42.3	9.5	9.5	22.233	220	220	0	39.403	42.3	39.5	251900000	121980000	129910000	119440000	100450000	4	4	8				226	133;134;209;210;491;492;703;704;705;803;804;1037;1038;1045;1741;1885;1886;1887;1948;1949;2026	False;False;False;False;False;False;False;False;False;False;False;False;False;False;False;True;True;True;False;False;False	137;138;216;217;503;504;718;719;720;819;820;1055;1056;1063;1768;1915;1916;1917;1980;1981;2059	292;293;294;295;296;297;465;466;467;1049;1050;1051;1052;1053;1054;1055;1491;1492;1493;1494;1495;1496;1696;1697;1698;1699;1700;1701;1702;1703;2191;2192;2193;2194;2195;2196;2197;2198;2199;2200;2219;3701;3702;3703;3704;3705;4044;4045;4046;4047;4048;4049;4050;4051;4188;4189;4190;4361;4362;4363	319;320;321;322;323;324;510;511;512;513;1152;1153;1154;1155;1156;1157;1158;1618;1619;1620;1621;1622;1623;1830;1831;1832;1833;1834;1835;1836;1837;2352;2353;2354;2355;2356;2357;2358;2359;2360;2361;2380;2381;4004;4005;4006;4007;4008;4009;4010;4394;4395;4396;4397;4398;4399;4400;4401;4554;4555;4556;4732;4733;4734	320;324;511;513;1152;1156;1618;1620;1623;1833;1835;2354;2359;2381;4006;4394;4399;4401;4555;4556;4734
A0A0G2K4G0	A0A0G2K4G0	19	17	17			tr|A0A0G2K4G0|A0A0G2K4G0_RAT Retinoic acid-induced 1 OS=Rattus norvegicus OX=10116 GN=Rai1 PE=1 SV=1	1	19	17	17	15	15	13	13	13	13	15	14.5	14.5	201.06	1887	1887	0	127.48	12.8	9.2	249390000	110790000	138610000	115420000	99826000	14	16	30				45	55;190;338;727;735;740;786;1236;1260;1328;1680;1768;1786;1926;2021;2196;2250;2251;2362	True;True;True;True;False;True;True;False;True;True;True;True;True;True;True;True;True;True;True	57;196;347;742;750;755;802;1255;1279;1347;1707;1795;1814;1958;2054;2232;2287;2288;2401	120;426;736;1540;1541;1554;1555;1564;1659;2644;2645;2685;2816;2817;2818;3564;3565;3759;3760;3805;3806;4139;4351;4352;4717;4718;4844;4845;4846;4847;4848;4849;5107;5108	136;471;803;1667;1668;1681;1682;1691;1793;2851;2852;2892;3028;3029;3030;3846;3847;4068;4069;4128;4129;4500;4722;4723;5144;5145;5278;5279;5280;5281;5282;5283;5579;5580	136;471;803;1668;1682;1691;1793;2851;2892;3028;3846;4068;4128;4500;4722;5145;5278;5283;5579
M0R7Q5;Q6TXJ0;P62243;D3ZIE1	M0R7Q5;Q6TXJ0;P62243;D3ZIE1	3;3;3;2	3;3;3;2	3;3;3;2	40S ribosomal protein S8	LOC100363452;LOC297756;Rps8;RGD1566369	tr|M0R7Q5|M0R7Q5_RAT 40S ribosomal protein S8 OS=Rattus norvegicus OX=10116 GN=LOC100363452 PE=3 SV=1;tr|Q6TXJ0|Q6TXJ0_RAT 40S ribosomal protein S8 OS=Rattus norvegicus OX=10116 GN=LOC297756 PE=2 SV=1;sp|P62243|RS8_RAT 40S ribosomal protein S8 OS=Rattus no	4	3	3	3	3	3	3	3	3	3	10.6	10.6	10.6	24.246	208	208;229;208;208	0	24.134	10.6	10.6	222660000	57107000	165550000	93382000	88482000	3	4	7				227	708;1199;2559	True;True;True	723;1217;2602	1500;1501;2571;2572;5587;5588;5589	1627;1628;2776;2777;6096;6097;6098	1627;2777;6097
F1LW91;F7FF45	F1LW91;F7FF45	7;7	7;7	7;7		Numa1	tr|F1LW91|F1LW91_RAT Nuclear mitotic apparatus protein 1 OS=Rattus norvegicus OX=10116 GN=Numa1 PE=1 SV=2;tr|F7FF45|F7FF45_RAT Nuclear mitotic apparatus protein 1 OS=Rattus norvegicus OX=10116 GN=Numa1 PE=1 SV=2	2	7	7	7	5	7	5	7	5	7	5.1	5.1	5.1	226.91	2019	2019;2091	0	68.078	4.1	5.1	215200000	94819000	120380000	109410000	76121000	7	8	15				189	213;901;1121;1156;1173;1256;1688	True;True;True;True;True;True;True	220;918;1139;1174;1191;1275;1715	470;471;472;1909;1910;1911;1912;2379;2483;2484;2523;2524;2679;2680;3576	516;517;518;2049;2050;2051;2052;2545;2684;2685;2727;2728;2886;2887;3858	516;2051;2545;2684;2727;2887;3858
D4A0X3	D4A0X3	14	14	14		Btbd8	tr|D4A0X3|D4A0X3_RAT BTB (POZ) domain-containing 8 OS=Rattus norvegicus OX=10116 GN=Btbd8 PE=1 SV=2	1	14	14	14	13	9	13	9	13	9	13.5	13.5	13.5	147.83	1367	1367	0	120.33	13.3	10	214890000	112420000	102470000	101340000	88299000	13	9	22				156	296;331;511;706;739;1456;1648;1824;1847;1899;2127;2449;2454;2516	True;True;True;True;True;True;True;True;True;True;True;True;True;True	304;340;523;721;754;1479;1675;1852;1875;1931;2162;2489;2494;2557	648;719;1088;1089;1497;1498;1562;1563;3095;3505;3896;3897;3958;3959;4087;4088;4590;5358;5359;5369;5370;5498	712;786;1191;1192;1624;1625;1689;1690;3352;3784;4229;4230;4303;4304;4445;4446;4991;5854;5855;5865;5866;6004	712;786;1192;1625;1689;3352;3784;4230;4304;4445;4991;5855;5866;6004
D4A6W6;P62919	D4A6W6;P62919	4;4	4;4	4;4	60S ribosomal protein L8	RGD1561333;Rpl8	tr|D4A6W6|D4A6W6_RAT Similar to 60S ribosomal protein L8 OS=Rattus norvegicus OX=10116 GN=RGD1561333 PE=3 SV=1;sp|P62919|RL8_RAT 60S ribosomal protein L8 OS=Rattus norvegicus OX=10116 GN=Rpl8 PE=2 SV=2	2	4	4	4	3	3	3	3	3	3	3.5	3.5	3.5	28.156	257	257;257	0	27.334	3.5	3.5	208880000	115370000	93511000	106620000	79214000	3	3	6				169	1184;1185;2407;2408	True;True;True;True	1202;1203;2446;2447	2542;2543;2544;5252;5253;5254	2746;2747;2748;5746;5747;5748	2747;2748;5746;5748
P52925;D3ZS25;D3ZN59;A0A0G2KA73	P52925;D3ZS25;D3ZN59	12;9;8;1	8;7;6;0	8;7;6;0	High mobility group protein B2	Hmgb2;RGD1561694;LOC100911856	sp|P52925|HMGB2_RAT High mobility group protein B2 OS=Rattus norvegicus OX=10116 GN=Hmgb2 PE=2 SV=2;tr|D3ZS25|D3ZS25_RAT Similar to High mobility group protein 2 (HMG-2) OS=Rattus norvegicus OX=10116 GN=RGD1561694 PE=4 SV=2;tr|D3ZN59|D3ZN59_RAT Similar to	4	12	8	8	12	7	8	4	8	4	40.5	24.3	24.3	24.159	210	210;209;209;163	0	58.066	40.5	27.6	206060000	98022000	108040000	93236000	86204000	9	5	14				262	452;453;960;961;1056;1092;1093;1465;1466;1589;1869;1983	True;False;True;True;False;True;True;False;False;True;True;True	464;465;977;978;1074;1110;1111;1489;1490;1616;1897;2016	980;981;2038;2039;2040;2041;2042;2043;2246;2247;2320;2321;3107;3108;3109;3110;3383;3384;4002;4271;4272	1078;1079;2184;2185;2186;2187;2188;2189;2411;2412;2485;2486;3364;3365;3366;3367;3658;3659;4347;4642;4643	1078;1079;2187;2189;2411;2485;2486;3365;3367;3659;4347;4642
G3V9W0;G3V832	G3V9W0	13;3	13;3	13;3		Cetn2	tr|G3V9W0|G3V9W0_RAT Centrin 2 OS=Rattus norvegicus OX=10116 GN=Cetn2 PE=1 SV=1	2	13	13	13	7	10	7	10	7	10	65.7	65.7	65.7	19.841	172	172;172	0	125.15	34.9	49.4	183110000	63629000	119480000	76330000	77343000	8	12	20				219	66;145;371;391;974;1172;1243;1244;1416;1417;1418;1463;2274	True;True;True;True;True;True;True;True;True;True;True;True;True	68;149;381;402;992;1190;1262;1263;1436;1437;1438;1487;2312	145;146;147;148;149;316;817;851;2074;2522;2657;2658;2659;2660;3019;3020;3021;3104;3105;4892	161;162;163;164;165;343;898;933;2220;2726;2864;2865;2866;2867;3270;3271;3272;3361;3362;5326	164;343;898;933;2220;2726;2865;2867;3270;3271;3272;3361;5326
M0RDW5;Q9EQC9	M0RDW5;Q9EQC9	7;6	7;6	5;4	CXXC-type zinc finger protein 4	Cxxc4	tr|M0RDW5|M0RDW5_RAT CXXC-type zinc finger protein 4 OS=Rattus norvegicus OX=10116 GN=Cxxc4 PE=4 SV=1;sp|Q9EQC9|CXXC4_RAT CXXC-type zinc finger protein 4 OS=Rattus norvegicus OX=10116 GN=Cxxc4 PE=1 SV=1	2	7	7	5	3	7	3	7	3	5	20.5	20.5	15.6	36.444	365	365;198	0	48.368	8.2	20.5	174400000	26053000	148350000	38218000	99633000	3	7	10				233	288;584;1012;1110;1266;1562;2294	True;True;True;True;True;True;True	296;597;1030;1128;1285;1588;2332	619;620;1236;2139;2357;2692;2693;3330;4935;4936	672;673;1342;2296;2522;2899;2900;3601;5378;5379	672;1342;2296;2522;2900;3601;5378
F1LQ90;Q62655-2	F1LQ90;Q62655-2	12;12	12;12	2;2	Transcription factor 4	Tcf4	tr|F1LQ90|F1LQ90_RAT Transcription factor 4 OS=Rattus norvegicus OX=10116 GN=Tcf4 PE=1 SV=3;sp|Q62655-2|ITF2_RAT Isoform 2 of Transcription factor 4 OS=Rattus norvegicus OX=10116 GN=Tcf4	2	12	12	2	3	10	3	10	0	2	31.8	31.8	3.6	62.564	585	585;585	0	117.23	9.4	24.8	171970000	57599000	114370000	57599000	86188000	3	14	17				183	138;798;802;877;910;1230;1346;1472;1946;1972;1973;2477	True;True;True;True;True;True;True;True;True;True;True;True	142;814;818;894;927;1249;1365;1496;1978;2005;2006;2517	305;1688;1695;1862;1931;1932;2636;2637;2854;3116;3117;3118;3119;4183;4249;4250;5417	332;1822;1829;2002;2071;2072;2843;2844;3069;3373;3374;3375;3376;4547;4619;4620;5918	332;1822;1829;2002;2071;2844;3069;3375;4547;4619;4620;5918
Q6AXS5-2;Q6AXS5	Q6AXS5-2;Q6AXS5	5;5	5;5	5;5	Plasminogen activator inhibitor 1 RNA-binding protein;Plasminogen activator inhibitor 1 RNA-binding protein, N-terminally processed	Serbp1	sp|Q6AXS5-2|PAIRB_RAT Isoform 2 of Plasminogen activator inhibitor 1 RNA-binding protein OS=Rattus norvegicus OX=10116 GN=Serbp1;sp|Q6AXS5|PAIRB_RAT Plasminogen activator inhibitor 1 RNA-binding protein OS=Rattus norvegicus OX=10116 GN=Serbp1 PE=1 SV=2	2	5	5	5	4	5	4	5	4	5	16.6	16.6	16.6	42.984	392	392;407	0	53.854	11.2	16.6	167670000	59682000	107980000	65425000	75634000	4	7	11				325	417;1812;1813;2191;2410	True;True;True;True;True	428;1840;1841;2227;2449	904;905;906;3869;3870;3871;3872;3873;3874;4710;5257;5258	990;991;992;4198;4199;4200;4201;4202;4203;5137;5751;5752	991;4200;4203;5137;5751
Q5PQR0;E9PTI6	Q5PQR0;E9PTI6	3;3	3;3	3;3		Raly	tr|Q5PQR0|Q5PQR0_RAT RALY heterogeneous nuclear ribonucleoprotein OS=Rattus norvegicus OX=10116 GN=Raly PE=1 SV=1;tr|E9PTI6|E9PTI6_RAT RALY heterogeneous nuclear ribonucleoprotein OS=Rattus norvegicus OX=10116 GN=Raly PE=1 SV=2	2	3	3	3	1	3	1	3	1	3	8.5	8.5	8.5	31.049	295	295;311	0	58.326	3.4	8.5	162650000	11022000	151630000	13507000	111780000	1	4	5				178	2101;2139;2199	True;True;True	2136;2174;2235	4525;4526;4612;4613;4724	4909;4910;5013;5014;5152	4910;5013;5152
D4A380;F1M7M2;Q80W90;P36198;Q80W90-2	D4A380;F1M7M2;Q80W90;P36198;Q80W90-2	4;4;4;4;3	4;4;4;4;3	4;4;4;4;3	LIM/homeobox protein Lhx9;LIM/homeobox protein Lhx2	Lhx2;Lhx9	tr|D4A380|D4A380_RAT LIM homeobox protein 2 (Predicted) OS=Rattus norvegicus OX=10116 GN=Lhx2 PE=4 SV=1;tr|F1M7M2|F1M7M2_RAT LIM/homeobox protein Lhx2 OS=Rattus norvegicus OX=10116 GN=Lhx2 PE=4 SV=2;sp|Q80W90|LHX9_RAT LIM/homeobox protein Lhx9 OS=Rattus no	5	4	4	4	2	4	2	4	2	4	8.4	8.4	8.4	44.419	406	406;427;388;426;321	0	30.827	5.2	8.4	159740000	54556000	105180000	74094000	59728000	3	7	10				161	2173;2174;2313;2450	True;True;True;True	2209;2210;2352;2490	4679;4680;4681;4682;4683;4986;4987;4988;4989;5360	5105;5106;5107;5108;5109;5436;5437;5438;5439;5856	5105;5109;5439;5856
Q9ERU2	Q9ERU2	7	7	7	Zinc finger protein 22	Znf22	sp|Q9ERU2|ZNF22_RAT Zinc finger protein 22 OS=Rattus norvegicus OX=10116 GN=Znf22 PE=2 SV=2	1	7	7	7	3	7	3	7	3	7	31.2	31.2	31.2	27.286	237	237	0	49.981	11.8	31.2	154610000	39488000	115120000	51897000	74344000	3	9	12				344	131;569;614;942;1048;1583;1907	True;True;True;True;True;True;True	135;582;627;959;1066;1609;1939	289;290;1213;1214;1215;1294;1295;2005;2227;2228;3366;4101	316;317;1319;1320;1321;1402;1403;2148;2392;2393;3641;4461	317;1320;1403;2148;2393;3641;4461
Q5U2M4;A0A096MKE9;A0A096MJI5	Q5U2M4;A0A096MKE9	16;16;4	16;16;4	16;16;4	DNA ligase	Lig3	tr|Q5U2M4|Q5U2M4_RAT DNA ligase OS=Rattus norvegicus OX=10116 GN=Lig3 PE=1 SV=1;tr|A0A096MKE9|A0A096MKE9_RAT DNA ligase OS=Rattus norvegicus OX=10116 GN=Lig3 PE=1 SV=1	3	16	16	16	6	14	6	14	6	14	16.1	16.1	16.1	105.44	943	943;1002;83	0	108.92	9.2	14.2	152500000	31541000	120960000	35081000	87616000	7	16	23				5	8;38;262;466;532;588;989;1025;1067;1171;1309;1348;1357;1358;1738;1833	True;True;True;True;True;True;True;True;True;True;True;True;True;True;True;True	8;38;270;478;544;601;1007;1043;1085;1189;1328;1367;1376;1377;1765;1861	16;17;93;567;568;569;570;1001;1131;1240;2102;2103;2162;2269;2270;2520;2521;2775;2856;2888;2889;3694;3920	21;22;109;619;620;621;622;1099;1237;1346;2255;2256;2319;2434;2435;2724;2725;2983;3071;3133;3134;3997;4264	22;109;622;1099;1237;1346;2255;2319;2435;2725;2983;3071;3133;3134;3997;4264
A0A0G2JY68;M0RCH8;Q7TQ86	A0A0G2JY68;M0RCH8	9;9;4	9;9;4	9;9;4			tr|A0A0G2JY68|A0A0G2JY68_RAT Ribosomal L1 domain-containing 1-like 1 OS=Rattus norvegicus OX=10116 GN=Rsl1d1l1 PE=1 SV=1;tr|M0RCH8|M0RCH8_RAT Ribosomal L1 domain-containing 1-like 1 OS=Rattus norvegicus OX=10116 GN=Rsl1d1l1 PE=1 SV=2	3	9	9	9	8	7	8	7	8	7	14.8	14.8	14.8	51.488	460	460;464;540	0	86.793	14.6	14.8	149790000	67323000	82462000	62673000	66793000	8	7	15				25	155;232;423;1041;1042;1047;1448;1449;1911	True;True;True;True;True;True;True;True;True	160;240;434;1059;1060;1065;1470;1471;1943	345;507;917;918;2211;2212;2213;2214;2225;2226;3080;3081;3082;4111;4112	379;557;1003;1004;2372;2373;2374;2375;2390;2391;3337;3338;3339;4472;4473	379;557;1004;2372;2374;2390;3337;3339;4472
Q1RP77	Q1RP77	4	4	4	Nucleolar protein 16	Nop16	sp|Q1RP77|NOP16_RAT Nucleolar protein 16 OS=Rattus norvegicus OX=10116 GN=Nop16 PE=2 SV=1	1	4	4	4	4	4	4	4	4	4	12.9	12.9	12.9	21.117	178	178	0	28.599	12.9	12.9	148810000	68329000	80483000	65878000	63103000	5	4	9				289	552;830;909;1641	True;True;True;True	565;847;926;1668	1173;1174;1775;1776;1929;1930;3491;3492;3493	1279;1280;1914;1915;2069;2070;3770;3771;3772	1279;1914;2069;3771
F1LLW9	F1LLW9	7	7	7		Kdm2b	tr|F1LLW9|F1LLW9_RAT Lysine demethylase 2B OS=Rattus norvegicus OX=10116 GN=Kdm2b PE=1 SV=3	1	7	7	7	4	7	4	7	4	7	8.3	8.3	8.3	122.86	1078	1078	0	46.124	4	8.3	140740000	23485000	117250000	32391000	79457000	3	10	13				179	221;720;876;1198;1424;1748;1846	True;True;True;True;True;True;True	229;735;893;1216;1444;1775;1874	490;1528;1861;2568;2569;2570;3032;3033;3034;3721;3722;3955;3956;3957	536;1655;2001;2773;2774;2775;3283;3284;3285;4029;4030;4300;4301;4302	536;1655;2001;2774;3284;4030;4301
F1M9G6;O88664	F1M9G6;O88664	4;4	4;4	4;4	Serine/threonine-protein kinase TAO1	Taok1	tr|F1M9G6|F1M9G6_RAT Serine/threonine-protein kinase TAO1 OS=Rattus norvegicus OX=10116 GN=Taok1 PE=1 SV=3;sp|O88664|TAOK1_RAT Serine/threonine-protein kinase TAO1 OS=Rattus norvegicus OX=10116 GN=Taok1 PE=1 SV=1	2	4	4	4	2	4	2	4	2	4	4.5	4.5	4.5	114.8	992	992;1001	0	57.659	2.5	4.5	139040000	56843000	82193000	65738000	53046000	1	4	5				202	861;1567;2152;2184	True;True;True;True	878;1593;2188;2220	1838;3337;3338;4637;4638;4701	1978;3608;3609;5040;5041;5128	1978;3609;5041;5128
A0A0H2UHU0;M0R763;P62853;F1M6F4;D4AE10;D3ZCH5	A0A0H2UHU0;M0R763;P62853;F1M6F4;D4AE10	5;5;5;3;3;2	5;5;5;3;3;2	5;5;5;3;3;2	40S ribosomal protein S25	LOC100911337;Rps25;LOC100912210;RGD1563613	tr|A0A0H2UHU0|A0A0H2UHU0_RAT 40S ribosomal protein S25 OS=Rattus norvegicus OX=10116 GN=Rps25 PE=4 SV=1;tr|M0R763|M0R763_RAT 40S ribosomal protein S25-like OS=Rattus norvegicus OX=10116 GN=LOC100911337 PE=4 SV=1;sp|P62853|RS25_RAT 40S ribosomal protein S25	6	5	5	5	3	5	3	5	3	5	33.9	33.9	33.9	13.611	124	124;125;125;124;124;130	0	32.13	21	33.9	136040000	52769000	83272000	56371000	59152000	3	6	9				78	21;200;875;1270;1576	True;True;True;True;True	21;207;892;1289;1602	52;53;54;447;448;1860;2701;2702;3355	68;69;70;492;493;2000;2908;2909;3626	68;493;2000;2909;3626
Q642E2;D3ZJD3;P17702;A0A0G2K8E0;D3ZEI0;Q6TUD7	Q642E2;D3ZJD3;P17702;A0A0G2K8E0	5;5;5;4;2;1	5;5;5;4;2;1	5;5;5;4;2;1	60S ribosomal protein L28	LOC100362069;RGD1565183;Rpl28	tr|Q642E2|Q642E2_RAT 60S ribosomal protein L28 OS=Rattus norvegicus OX=10116 GN=Rpl28 PE=2 SV=1;tr|D3ZJD3|D3ZJD3_RAT Similar to ribosomal protein L28 OS=Rattus norvegicus OX=10116 GN=LOC100362069 PE=4 SV=1;sp|P17702|RL28_RAT 60S ribosomal protein L28 OS=Ra	6	5	5	5	3	4	3	4	3	4	27.7	27.7	27.7	15.733	137	137;137;137;137;144;102	0	29.909	20.4	22.6	134390000	85524000	48870000	60890000	61463000	3	4	7				136	231;1819;1939;2070;2071	True;True;True;True;True	239;1847;1971;2103;2104	506;3888;4168;4169;4448;4449;4450	556;4221;4531;4532;4825;4826;4827	556;4221;4531;4825;4827
G3V9T6;A0A0G2K7P2;Q6TXI8	G3V9T6;A0A0G2K7P2	12;12;2	12;12;2	12;12;2		Phf14	tr|G3V9T6|G3V9T6_RAT PHD finger protein 14 OS=Rattus norvegicus OX=10116 GN=Phf14 PE=1 SV=1;tr|A0A0G2K7P2|A0A0G2K7P2_RAT PHD finger protein 14 OS=Rattus norvegicus OX=10116 GN=Phf14 PE=1 SV=1	3	12	12	12	4	11	4	11	4	11	17.2	17.2	17.2	99.071	880	880;928;566	0	93.113	5.9	15	132540000	20901000	111640000	28600000	76434000	5	12	17				58	856;1032;1415;1462;1564;1568;1658;1693;1912;2149;2150;2219	True;True;True;True;True;True;True;True;True;True;True;True	873;1050;1435;1486;1590;1594;1685;1720;1944;2185;2186;2256	1830;2179;3018;3103;3334;3339;3526;3527;3585;3586;4113;4114;4115;4116;4633;4634;4774	1970;2340;3269;3360;3605;3610;3805;3806;3867;3868;4474;4475;4476;4477;5036;5037;5207	1970;2340;3269;3360;3605;3610;3806;3867;4477;5036;5037;5207
F1M816;F1M455	F1M816;F1M455	12;12	12;12	12;12		Spen	tr|F1M816|F1M816_RAT RCG30673 OS=Rattus norvegicus OX=10116 GN=Spen PE=1 SV=3;tr|F1M455|F1M455_RAT Spen family transcriptional repressor OS=Rattus norvegicus OX=10116 GN=Spen PE=1 SV=3	2	12	12	12	9	9	9	9	9	9	3.1	3.1	3.1	390.26	3563	3563;3584	0	119.55	2.5	3	131750000	62176000	69570000	65769000	48835000	10	10	20				196	759;773;1205;1206;1282;1382;1493;1661;1991;2069;2103;2325	True;True;True;True;True;True;True;True;True;True;True;True	774;789;1223;1224;1301;1402;1518;1688;2024;2102;2138;2364	1600;1601;1639;2584;2585;2586;2587;2588;2721;2722;2953;3172;3533;3534;4293;4446;4447;4531;4532;5011;5012	1727;1728;1773;2789;2790;2791;2792;2793;2928;2929;3200;3439;3812;3813;4664;4823;4824;4915;4916;4917;5464;5465	1727;1773;2789;2791;2929;3200;3439;3813;4664;4823;4917;5465
F1LT35;D3ZTH8;D4AAL7;P62752;D3ZSR8;D3ZTX9;A0A0G2JU90;D3ZFK7	F1LT35;D3ZTH8;D4AAL7;P62752;D3ZSR8	5;5;5;5;3;2;2;1	5;5;5;5;3;2;2;1	5;5;5;5;3;2;2;1	60S ribosomal protein L23a	RGD1564606;LOC689899;LOC683904;Rpl23a;LOC680441	tr|F1LT35|F1LT35_RAT Similar to 60S ribosomal protein L23a OS=Rattus norvegicus OX=10116 GN=RGD1564606 PE=3 SV=1;tr|D3ZTH8|D3ZTH8_RAT Similar to 60S ribosomal protein L23a OS=Rattus norvegicus OX=10116 GN=LOC689899 PE=3 SV=1;tr|D4AAL7|D4AAL7_RAT Uncharacte	8	5	5	5	4	5	4	5	4	5	20.5	20.5	20.5	17.734	156	156;156;158;156;154;158;193;158	0	32.515	20.5	20.5	128100000	51496000	76602000	63384000	45840000	4	6	10				144	244;398;1050;1060;2321	True;True;True;True;True	252;409;1068;1078;2360	527;863;864;865;2231;2232;2251;2252;5003;5004	578;945;946;947;2396;2397;2416;2417;5454;5455	578;945;2396;2417;5454
G3V669;D4AC19;A0A0G2JSK6;D3Z8B1;A0A0G2JT82;P50575	G3V669	6;1;1;1;1;1	6;1;1;1;1;1	5;0;0;0;0;0		Dlx1	tr|G3V669|G3V669_RAT Distal-less homeobox 1 OS=Rattus norvegicus OX=10116 GN=Dlx1 PE=4 SV=1	6	6	6	5	4	6	4	6	4	5	20.4	20.4	17.6	27.308	255	255;238;289;323;399;289	0	52.859	16.1	20.4	126870000	36444000	90430000	42766000	61826000	4	8	12				208	158;1023;1238;1239;2154;2155	True;True;True;True;True;True	163;1041;1257;1258;2190;2191	350;351;352;2160;2647;2648;2649;2650;2651;4641;4642;4643	384;385;386;2317;2854;2855;2856;2857;2858;5044;5045;5046	384;2317;2855;2857;5045;5046
M0R4L7;G3V8B3;D3ZWM5;A0A0G2JXE0;D3ZNH4;A0A0G2JXI9;Q00715;G3V9C7;D3ZLY9;A0A0G2K7R1;Q00729;D4A817;M0RBQ5;D3ZNZ9	M0R4L7;G3V8B3;D3ZWM5;A0A0G2JXE0;D3ZNH4;A0A0G2JXI9;Q00715;G3V9C7;D3ZLY9;A0A0G2K7R1;Q00729;D4A817;M0RBQ5;D3ZNZ9	6;6;6;6;6;6;6;5;5;4;4;3;3;3	6;6;6;6;6;6;6;5;5;4;4;3;3;3	6;6;6;6;6;6;6;5;5;4;4;3;3;3	Histone H2B;Histone H2B type 1;Histone H2B type 1-A	Hist1h2bl;LOC100910200;Hist1h2bb;Hist1h2bo;Hist1h2bk;Hist1h2bh;Hist1h2ba;LOC100912338;Hist3h2bb;Hist3h2ba	tr|M0R4L7|M0R4L7_RAT Histone H2B OS=Rattus norvegicus OX=10116 GN=Hist1h2bl PE=3 SV=1;tr|G3V8B3|G3V8B3_RAT Histone H2B OS=Rattus norvegicus OX=10116 GN=Hist1h2bq PE=3 SV=1;tr|D3ZWM5|D3ZWM5_RAT Histone H2B OS=Rattus norvegicus OX=10116 GN=Hist1h2bd PE=3 SV=	14	6	6	6	5	5	5	5	5	5	33.3	33.3	33.3	13.91	126	126;126;126;126;138;138;125;126;126;118;127;126;126;126	0	41.364	33.3	27.8	125530000	43294000	82234000	44159000	61107000	5	5	10				23	250;441;1061;1699;2088;2447	True;True;True;True;True;True	258;453;1079;1726;2123;2487	541;542;961;2253;3597;3598;3599;4492;4493;5354;5355	592;593;1058;2418;3879;3880;3881;4869;4870;5850;5851	593;1058;2418;3880;4870;5851
Q925G0	Q925G0	10	2	2	RNA-binding protein 3	Rbm3	sp|Q925G0|RBM3_RAT RNA-binding protein 3 OS=Rattus norvegicus OX=10116 GN=Rbm3 PE=1 SV=2	1	10	2	2	10	9	2	2	2	2	44.5	16.1	16.1	16.855	155	155	0	43.383	44.5	37.4	113540000	76737000	36808000	73138000	31337000	3	2	5				343	168;169;170;385;669;1593;1636;2080;2553;2610	False;False;False;True;False;False;False;True;False;False	173;174;175;396;684;1620;1663;2113;2596;2654	376;377;378;379;380;381;382;383;384;385;841;842;1425;3389;3390;3477;3478;4465;4466;4467;5575;5576;5577;5578;5714;5715	413;414;415;416;417;418;419;420;421;422;923;924;1550;3664;3665;3756;3757;4842;4843;4844;6082;6083;6084;6085;6225;6226	415;418;421;923;1550;3664;3756;4842;6082;6226
A0A0G2K1E3	A0A0G2K1E3	9	9	9			tr|A0A0G2K1E3|A0A0G2K1E3_RAT Lysine methyltransferase 2B OS=Rattus norvegicus OX=10116 GN=Kmt2b PE=1 SV=1	1	9	9	9	6	7	6	7	6	7	4.7	4.7	4.7	294.91	2714	2714	0	79.335	3.9	3.5	111330000	53808000	57526000	54859000	42301000	6	6	12				35	3;290;434;636;668;1208;1403;1711;1935	True;True;True;True;True;True;True;True;True	3;298;445;649;683;1227;1423;1738;1967	3;4;622;937;1347;1423;1424;2593;2594;2996;2997;3627;4161	3;4;675;1024;1469;1548;1549;2800;2801;3247;3248;3911;4524	4;675;1024;1469;1548;2800;3248;3911;4524
A0A0G2K8K0	A0A0G2K8K0	10	10	9			tr|A0A0G2K8K0|A0A0G2K8K0_RAT Splicing factor proline and glutamine rich OS=Rattus norvegicus OX=10116 GN=Sfpq PE=1 SV=1	1	10	10	9	2	10	2	10	2	9	14.4	14.4	12.9	75.085	696	696	0	71.427	3.9	14.4	110450000	19631000	90815000	19631000	68438000	2	12	14				62	251;467;525;549;709;748;998;1683;1762;2001	True;True;True;True;True;True;True;True;True;True	259;479;537;562;724;763;1016;1710;1789;2034	543;544;1002;1122;1123;1168;1169;1502;1579;1580;2117;3569;3747;4315	594;595;1100;1228;1229;1274;1275;1629;1706;1707;2270;3851;4056;4686	595;1100;1228;1275;1629;1707;2270;3851;4056;4686
D3ZDN6	D3ZDN6	9	9	9		Zfp787	tr|D3ZDN6|D3ZDN6_RAT Similar to TTF-I interacting peptide 20; TIP20; Transcription Termination Factor I Interacting Peptide 20 (Predicted) OS=Rattus norvegicus OX=10116 GN=Zfp787 PE=1 SV=1	1	9	9	9	8	5	8	5	8	5	22.8	22.8	22.8	40.502	381	381	0	70.502	18.6	16.5	110180000	86320000	23861000	63484000	40818000	9	5	14				124	80;598;862;941;1906;2208;2209;2430;2431	True;True;True;True;True;True;True;True;True	82;611;879;958;1938;2244;2245;2470;2471	180;181;1261;1262;1263;1839;2004;4100;4741;4742;4743;5307;5308;5309	199;200;1367;1368;1369;1979;2147;4460;5170;5171;5172;5801;5802;5803	200;1368;1979;2147;4460;5171;5172;5801;5802
D3ZEI3	D3ZEI3	6	6	6		Zfp821	tr|D3ZEI3|D3ZEI3_RAT Zinc finger protein 821 OS=Rattus norvegicus OX=10116 GN=Zfp821 PE=4 SV=1	1	6	6	6	1	6	1	6	1	6	12.8	12.8	12.8	46.814	413	413	0	49.591	2.9	12.8	107930000	5285700	102640000	5285700	77352000	1	8	9				127	346;1287;1371;1450;1665;1782	True;True;True;True;True;True	355;1306;1390;1472;1692;1810	750;2733;2734;2915;2916;3083;3084;3539;3794	817;2940;2941;3162;3163;3340;3341;3818;4108	817;2940;3163;3340;3818;4108
F1LPS8;P86252	F1LPS8	11;2	6;2	6;2		Pura	tr|F1LPS8|F1LPS8_RAT Transcriptional activator protein Pur-alpha OS=Rattus norvegicus OX=10116 GN=Pura PE=1 SV=3	2	11	6	6	5	10	3	6	3	6	21.5	11.4	11.4	31.903	289	289;138	0	36.629	14.9	18	106290000	17319000	88973000	0	67050000	2	5	7				181	152;541;611;994;1204;1800;1866;1867;2388;2609;2622	False;True;False;False;True;True;False;False;True;True;True	157;554;624;1012;1222;1828;1894;1895;2427;2653;2666	341;1152;1153;1290;2110;2583;3843;3997;3998;3999;5201;5202;5713;5745;5746	374;1258;1259;1398;2263;2788;4169;4342;4343;4344;5686;5687;6224;6256;6257	374;1259;1398;2263;2788;4169;4343;4344;5687;6224;6257
M0R750	M0R750	9	9	9			tr|M0R750|M0R750_RAT Snf2-related CREBBP activator protein OS=Rattus norvegicus OX=10116 GN=Srcap PE=1 SV=2	1	9	9	9	6	7	6	7	6	7	2.8	2.8	2.8	342.73	3205	3205	0	66.914	1.9	2.7	103580000	35968000	67610000	41434000	45485000	7	9	16				225	341;809;870;1315;1316;1360;1759;1913;2053	True;True;True;True;True;True;True;True;True	350;825;887;1334;1335;1379;1786;1945;2086	740;741;742;743;1714;1715;1849;2787;2788;2789;2892;2893;3743;4117;4412;4413	807;808;809;810;1848;1849;1989;2997;2998;2999;3138;3139;4052;4478;4785;4786	808;1849;1989;2997;2999;3139;4052;4478;4786
A0A0G2K079;F1LN49;Q3ZB98-2;Q3ZB98-4;Q3ZB98-3;Q3ZB98-6;Q3ZB98;Q3ZB98-5	A0A0G2K079;F1LN49;Q3ZB98-2;Q3ZB98-4;Q3ZB98-3;Q3ZB98-6;Q3ZB98;Q3ZB98-5	7;7;7;7;7;7;7;7	7;7;7;7;7;7;7;7	7;7;7;7;7;7;7;7	Breast carcinoma-amplified sequence 1 homolog	Bcas1	tr|A0A0G2K079|A0A0G2K079_RAT Breast carcinoma-amplified sequence 1 homolog OS=Rattus norvegicus OX=10116 GN=Bcas1 PE=1 SV=1;tr|F1LN49|F1LN49_RAT Breast carcinoma-amplified sequence 1 homolog OS=Rattus norvegicus OX=10116 GN=Bcas1 PE=1 SV=1;sp|Q3ZB98-2|BCAS	8	7	7	7	6	6	6	6	6	6	23.3	23.3	23.3	37.499	347	347;589;499;508;522;544;555;600	0	58.261	18.7	23.3	103380000	50815000	52566000	46897000	43532000	6	6	12				30	94;795;1427;1763;1853;2115;2293	True;True;True;True;True;True;True	96;811;1447;1790;1881;2150;2331	204;205;1681;1682;3041;3748;3749;3967;4559;4560;4933;4934	226;227;1815;1816;3292;4057;4058;4312;4948;4949;5376;5377	227;1816;3292;4057;4312;4948;5377
A0A0H2UHU1;P61515;D4A7B1;D4AAZ6	A0A0H2UHU1;P61515;D4A7B1;D4AAZ6	3;3;2;2	3;3;2;2	3;3;2;2	Putative 60S ribosomal protein L37a;60S ribosomal protein L37a	Rpl37a-ps1;LOC679823;Rpl37a	tr|A0A0H2UHU1|A0A0H2UHU1_RAT 60S ribosomal protein L37a OS=Rattus norvegicus OX=10116 GN=Rpl37a PE=3 SV=1;sp|P61515|RL37P_RAT Putative 60S ribosomal protein L37a OS=Rattus norvegicus OX=10116 GN=Rpl37a-ps1 PE=5 SV=2;tr|D4A7B1|D4A7B1_RAT Similar to 60S ribo	4	3	3	3	3	3	3	3	3	3	37	37	37	10.276	92	92;92;92;72	0	26.361	37	37	103300000	44381000	58920000	46307000	42476000	3	4	7				79	1099;1183;2341	True;True;True	1117;1201;2380	2331;2332;2333;2540;2541;5055;5056	2496;2497;2498;2744;2745;5509;5510	2498;2744;5510
Q4V898;P84586;A0A0A0MXW9;A0A0G2K8K9;D4AE41	Q4V898;P84586;A0A0A0MXW9	6;4;3;2;2	6;4;3;2;2	6;4;3;2;2	RNA-binding motif protein, X chromosome;RNA-binding motif protein, X chromosome, N-terminally processed;RNA-binding motif protein, X chromosome retrogene-like;RNA-binding motif protein, X chromosome retrogene-like, N-terminally processed	Rbmx;Rbmxrtl	sp|Q4V898|RBMX_RAT RNA-binding motif protein, X chromosome OS=Rattus norvegicus OX=10116 GN=Rbmx PE=1 SV=1;sp|P84586|RMXRL_RAT RNA-binding motif protein, X chromosome retrogene-like OS=Rattus norvegicus OX=10116 GN=Rbmxrtl PE=1 SV=1;tr|A0A0A0MXW9|A0A0A0MXW	5	6	6	6	6	3	6	3	6	3	22.3	22.3	22.3	42.257	390	390;388;368;388;388	0	43.073	22.3	11.5	101670000	74467000	27207000	55485000	39485000	8	3	11				301	112;317;370;384;1245;1856	True;True;True;True;True;True	115;325;380;395;1264;1884	251;684;816;838;839;840;2661;2662;3972;3973;3974	278;748;897;920;921;922;2868;2869;4317;4318;4319	278;748;897;920;2868;4317
F1M0L3;A0A0G2JXC9;Q62751	F1M0L3	7;1;1	7;1;1	7;1;1		Kmt2a	tr|F1M0L3|F1M0L3_RAT Histone-lysine N-methyltransferase OS=Rattus norvegicus OX=10116 GN=Kmt2a PE=1 SV=3	3	7	7	7	6	4	6	4	6	4	1.9	1.9	1.9	418.82	3843	3843;964;963	0	54.627	1.3	1.5	101210000	59814000	41401000	49198000	41815000	7	5	12				191	83;779;1089;1100;1798;1941;2289	True;True;True;True;True;True;True	85;795;1107;1118;1826;1973;2327	185;1649;2315;2316;2334;2335;3838;3839;3840;3841;4171;4924	204;1783;2480;2481;2499;2500;4164;4165;4166;4167;4534;5363	204;1783;2480;2500;4164;4534;5363
D3ZLH9;Q66HM7;P38656	D3ZLH9;Q66HM7;P38656	3;3;3	3;3;3	3;3;3	Lupus La protein homolog	LOC680385;Ssb	tr|D3ZLH9|D3ZLH9_RAT Similar to Sjogren syndrome antigen B OS=Rattus norvegicus OX=10116 GN=LOC680385 PE=4 SV=1;tr|Q66HM7|Q66HM7_RAT Lupus La protein homolog OS=Rattus norvegicus OX=10116 GN=Ssb PE=1 SV=1;sp|P38656|LA_RAT Lupus La protein homolog OS=Rattus	3	3	3	3	3	2	3	2	3	2	5.5	5.5	5.5	46.512	402	402;415;415	0	18.109	5.5	5	98445000	79563000	18882000	53081000	40711000	3	2	5				140	719;758;2305	True;True;True	734;773;2344	1527;1597;1598;1599;4971;4972	1654;1724;1725;1726;5421;5422	1654;1726;5421
A0A0H2UHR3;P08154	A0A0H2UHR3;P08154	3;3	3;3	2;2	Early growth response protein 1	Egr1	tr|A0A0H2UHR3|A0A0H2UHR3_RAT Early growth response protein OS=Rattus norvegicus OX=10116 GN=Egr1 PE=3 SV=1;sp|P08154|EGR1_RAT Early growth response protein 1 OS=Rattus norvegicus OX=10116 GN=Egr1 PE=1 SV=2	2	3	3	2	2	2	2	2	1	1	6.7	6.7	5	56.906	536	536;508	0	23.105	3.9	4.5	97818000	8836300	88982000	13939000	61954000	2	4	6				75	61;154;591	True;True;True	63;159;604	136;344;1245;1246;1247	152;377;378;1351;1352;1353	152;377;1352
P61354;D3ZTK5;M0R7P0	P61354;D3ZTK5;M0R7P0	6;4;3	6;4;3	6;4;3	60S ribosomal protein L27	Rpl27;RGD1563835;LOC100912027	sp|P61354|RL27_RAT 60S ribosomal protein L27 OS=Rattus norvegicus OX=10116 GN=Rpl27 PE=2 SV=2;tr|D3ZTK5|D3ZTK5_RAT 60S ribosomal protein L27 OS=Rattus norvegicus OX=10116 GN=RGD1563835 PE=1 SV=1;tr|M0R7P0|M0R7P0_RAT 60S ribosomal protein L27-like OS=Rattus	3	6	6	6	3	4	3	4	3	4	53.7	53.7	53.7	15.798	136	136;135;136	0	44.667	19.9	39	96016000	29547000	66469000	29547000	50091000	3	5	8				266	1189;1521;1534;2349;2520;2530	True;True;True;True;True;True	1207;1547;1560;2388;2563;2573	2553;3236;3237;3263;3264;5088;5515;5529	2757;3503;3504;3530;3531;5560;6021;6035	2757;3504;3530;5560;6021;6035
M0R440;A0A0G2K9Y9	M0R440;A0A0G2K9Y9	6;6	6;6	6;6		LOC682914	tr|M0R440|M0R440_RAT Zinc finger protein 326 (Fragment) OS=Rattus norvegicus OX=10116 GN=Zfp326 PE=1 SV=2;tr|A0A0G2K9Y9|A0A0G2K9Y9_RAT Zinc finger protein 326 OS=Rattus norvegicus OX=10116 GN=Zfp326 PE=1 SV=1	2	6	6	6	5	4	5	4	5	4	25.4	25.4	25.4	33.688	303	303;504	0	50.354	22.1	18.2	95016000	54154000	40861000	53660000	31287000	5	4	9				64	548;1553;1566;1950;2032;2117	True;True;True;True;True;True	561;1579;1592;1982;2065;2152	1167;3310;3336;4191;4192;4372;4373;4562;4563	1273;3581;3607;4557;4558;4743;4744;4951;4952	1273;3581;3607;4557;4743;4952
D4AA06	D4AA06	15	15	15	Histone-lysine N-methyltransferase	Nsd1	tr|D4AA06|D4AA06_RAT Nuclear receptor binding SET domain protein 1 (Predicted), isoform CRA_a OS=Rattus norvegicus OX=10116 GN=Nsd1 PE=1 SV=1	1	15	15	15	8	13	8	13	8	13	8.7	8.7	8.7	262.49	2381	2381	0	128.92	5.1	6.7	92169000	39148000	53022000	41831000	37274000	8	13	21				172	902;1073;1082;1286;1299;1300;1322;1337;2009;2018;2042;2278;2342;2457;2502	True;True;True;True;True;True;True;True;True;True;True;True;True;True;True	919;1091;1100;1305;1318;1319;1341;1356;2042;2051;2075;2316;2381;2497;2542	1913;2282;2304;2732;2757;2758;2759;2760;2804;2829;4333;4347;4348;4394;4898;4899;5057;5058;5375;5464;5465	2053;2447;2469;2939;2965;2966;2967;2968;3016;3041;4704;4718;4719;4766;5332;5333;5511;5512;5871;5965;5966	2053;2447;2469;2939;2966;2968;3016;3041;4704;4719;4766;5332;5512;5871;5965
Q63396	Q63396	4	4	4	Activated RNA polymerase II transcriptional coactivator p15	Sub1	sp|Q63396|TCP4_RAT Activated RNA polymerase II transcriptional coactivator p15 OS=Rattus norvegicus OX=10116 GN=Sub1 PE=1 SV=3	1	4	4	4	4	1	4	1	4	1	33.1	33.1	33.1	14.441	127	127	0	35.592	33.1	11.8	86753000	68332000	18421000	62438000	19776000	4	1	5				321	139;707;1691;2616	True;True;True;True	143;722;1718;2660	306;1499;3580;3581;3582;5731	333;1626;3862;3863;3864;6242	333;1626;3863;6242
A0A0G2JUJ1	A0A0G2JUJ1	7	7	7			tr|A0A0G2JUJ1|A0A0G2JUJ1_RAT RCG22661 OS=Rattus norvegicus OX=10116 GN=Zfp524 PE=4 SV=1	1	7	7	7	0	7	0	7	0	7	24.2	24.2	24.2	34.026	314	314	0	51.73	0	24.2	85202000	0	85202000	0	64208000	0	7	7				15	599;600;935;1094;1381;1628;2478	True;True;True;True;True;True;True	612;613;952;1112;1401;1655;2518	1264;1265;1990;2322;2952;3459;5418	1370;1371;2133;2487;3199;3738;5919	1370;1371;2133;2487;3199;3738;5919
A0A0G2KB97;P18576	A0A0G2KB97;P18576	5;5	5;5	5;5	Nuclear transcription factor Y subunit alpha	Nfya	tr|A0A0G2KB97|A0A0G2KB97_RAT Nuclear transcription factor Y subunit alpha OS=Rattus norvegicus OX=10116 GN=Nfya PE=1 SV=1;sp|P18576|NFYA_RAT Nuclear transcription factor Y subunit alpha OS=Rattus norvegicus OX=10116 GN=Nfya PE=1 SV=1	2	5	5	5	0	5	0	5	0	5	16.4	16.4	16.4	36.876	347	347;341	0	63.315	0	16.4	81829000	0	81829000	0	61666000	0	7	7				69	124;443;444;985;1235	True;True;True;True;True	128;455;456;1003;1254	275;963;964;965;2096;2097;2643	302;1060;1061;1062;1063;2249;2250;2850	302;1060;1061;2249;2850
P52909;A0A0G2JSY8;P24898	P52909	4;1;1	4;1;1	3;0;0	Transcription factor jun-D	Jund	sp|P52909|JUND_RAT Transcription factor jun-D OS=Rattus norvegicus OX=10116 GN=Jund PE=1 SV=1	3	4	4	3	3	3	3	3	2	2	9.1	9.1	7	34.874	341	341;344;344	0	43.61	8.5	9.1	80557000	22313000	58244000	23466000	42740000	3	3	6				261	483;1004;1005;2354	True;True;True;True	495;1022;1023;2393	1033;1034;2127;2128;5096;5097	1133;1134;2281;2282;5568;5569	1133;2281;2282;5569
E9PTC3;A0A0G2K8T6;F8WG35;Q62947-2;Q62947;E9PT24	E9PTC3;A0A0G2K8T6	7;4;3;3;3;2	7;4;3;3;3;2	7;4;3;3;3;2		Zeb2	tr|E9PTC3|E9PTC3_RAT Zinc finger E-box-binding homeobox 2 OS=Rattus norvegicus OX=10116 GN=Zeb2 PE=1 SV=2;tr|A0A0G2K8T6|A0A0G2K8T6_RAT Zinc finger E-box-binding homeobox 2 OS=Rattus norvegicus OX=10116 GN=Zeb2 PE=1 SV=1	6	7	7	7	4	7	4	7	4	7	6.6	6.6	6.6	136.51	1215	1215;1035;1089;911;1109;1008	0	56.644	4.1	6.6	79685000	35264000	44422000	28103000	40637000	5	6	11				176	389;589;590;1263;1423;1484;1485	True;True;True;True;True;True;True	400;602;603;1282;1443;1509;1510	848;849;1241;1242;1243;1244;2688;2689;3030;3031;3151;3152	930;931;1347;1348;1349;1350;2895;2896;3281;3282;3418;3419	931;1347;1350;2896;3282;3418;3419
G3V946;Q8K3E7	G3V946;Q8K3E7	3;3	3;3	3;3	Protein dpy-30 homolog	Dpy30	tr|G3V946|G3V946_RAT AIP1, isoform CRA_a OS=Rattus norvegicus OX=10116 GN=Dpy30 PE=1 SV=1;sp|Q8K3E7|DPY30_RAT Protein dpy-30 homolog OS=Rattus norvegicus OX=10116 GN=Dpy30 PE=1 SV=1	2	3	3	3	2	3	2	3	2	3	23.2	23.2	23.2	11.213	99	99;99	0	24.457	14.1	23.2	78361000	30858000	47503000	27949000	38707000	3	4	7				215	1014;1015;1524	True;True;True	1032;1033;1550	2141;2142;2143;2144;2145;2146;3240	2298;2299;2300;2301;2302;2303;3507	2301;2303;3507
D4A0Y6	D4A0Y6	11	11	11		Mki67	tr|D4A0Y6|D4A0Y6_RAT Marker of proliferation Ki-67 OS=Rattus norvegicus OX=10116 GN=Mki67 PE=1 SV=2	1	11	11	11	7	6	7	6	7	6	9.3	9.3	9.3	343.35	3119	3119	0	67.413	7.6	4.9	75521000	43235000	32286000	37239000	30327000	8	5	13				157	812;1002;1190;1272;1461;1642;1914;2259;2393;2415;2503	True;True;True;True;True;True;True;True;True;True;True	828;1020;1208;1291;1485;1669;1946;2296;2432;2454;2543	1720;1721;1722;2125;2554;2705;3102;3494;4118;4860;4861;5208;5209;5271;5466	1854;1855;1856;2279;2758;2912;3359;3773;4479;5294;5295;5693;5694;5765;5967	1856;2279;2758;2912;3359;3773;4479;5294;5694;5765;5967
P63014-2;P63014	P63014-2;P63014	3;3	3;3	3;3	Paired mesoderm homeobox protein 1	Prrx1	sp|P63014-2|PRRX1_RAT Isoform 2 of Paired mesoderm homeobox protein 1 OS=Rattus norvegicus OX=10116 GN=Prrx1;sp|P63014|PRRX1_RAT Paired mesoderm homeobox protein 1 OS=Rattus norvegicus OX=10116 GN=Prrx1 PE=1 SV=1	2	3	3	3	2	3	2	3	2	3	22.6	22.6	22.6	24.369	217	217;245	0	35.19	9.2	22.6	74936000	35606000	39330000	41037000	24208000	2	3	5				279	167;1805;2012	True;True;True	172;1833;2045	374;375;3856;3857;4336	411;412;4185;4186;4707	411;4186;4707
F2Z3R2;F1LQ48;F1LQ48-2;F1M040	F2Z3R2;F1LQ48;F1LQ48-2	6;6;4;1	6;6;4;1	6;6;4;1		Hnrnpl	tr|F2Z3R2|F2Z3R2_RAT Heterogeneous nuclear ribonucleoprotein L OS=Rattus norvegicus OX=10116 GN=Hnrnpl PE=1 SV=1;sp|F1LQ48|HNRPL_RAT Heterogeneous nuclear ribonucleoprotein L OS=Rattus norvegicus OX=10116 GN=Hnrnpl PE=1 SV=2;sp|F1LQ48-2|HNRPL_RAT Isoform 2	4	6	6	6	3	6	3	6	3	6	8.5	8.5	8.5	63.963	586	586;623;245;446	0	43.946	4.1	8.5	74567000	28313000	46254000	38160000	25010000	3	7	10				182	119;597;1227;1549;2618;2619	True;True;True;True;True;True	123;610;1246;1575;2662;2663	266;1260;2631;2632;3303;5733;5734;5735;5736;5737	293;1366;2838;2839;3574;6244;6245;6246;6247;6248	293;1366;2838;3574;6244;6247
P62634	P62634	6	6	6	Cellular nucleic acid-binding protein	Cnbp	sp|P62634|CNBP_RAT Cellular nucleic acid-binding protein OS=Rattus norvegicus OX=10116 GN=Cnbp PE=2 SV=1	1	6	6	6	4	5	4	5	4	5	40.7	40.7	40.7	19.463	177	177	0	41.695	26.6	31.1	73441000	26178000	47263000	27466000	34329000	4	5	9				273	280;281;480;677;2121;2311	True;True;True;True;True;True	288;289;492;692;2156;2350	604;605;1027;1028;1440;4572;4573;4983;4984	657;658;1127;1128;1565;4962;4963;5433;5434	657;658;1128;1565;4963;5433
B2RYQ5	B2RYQ5	1	1	1	Enhancer of rudimentary homolog	Erh	tr|B2RYQ5|B2RYQ5_RAT Enhancer of rudimentary homolog OS=Rattus norvegicus OX=10116 GN=Erh PE=1 SV=1	1	1	1	1	1	1	1	1	1	1	15.4	15.4	15.4	12.259	104	104	0.0035842	10.75	15.4	15.4	69289000	30210000	39078000	30198000	29461000	2	2	4				96	1961	TRUE	1993	4220;4221;4222;4223	4586;4587;4588;4589	4586
B5DEY7;Q64289;D3ZEK9;G3V8X3;D4A7M5	B5DEY7	8;3;1;1;1	8;3;1;1;1	5;0;0;0;0	Neurogenic differentiation factor	Neurod6	tr|B5DEY7|B5DEY7_RAT Neurogenic differentiation factor OS=Rattus norvegicus OX=10116 GN=Neurod6 PE=2 SV=1	5	8	8	5	2	8	2	8	2	5	29.1	29.1	24.6	38.653	337	337;357;195;209;330	0	58.275	9.2	29.1	68964000	4985400	63979000	9078400	44121000	2	8	10				101	743;1193;1336;1407;1435;1901;2076;2521	True;True;True;True;True;True;True;True	758;1211;1355;1427;1455;1933;2109;2564	1571;2559;2828;3002;3055;4092;4093;4457;4458;5516	1698;2763;3040;3253;3306;4452;4453;4834;4835;6022	1698;2763;3040;3253;3306;4453;4835;6022
Q5PQK2	Q5PQK2	3	3	2		Fus	tr|Q5PQK2|Q5PQK2_RAT FUS RNA-binding protein OS=Rattus norvegicus OX=10116 GN=Fus PE=1 SV=1	1	3	3	2	3	3	3	3	2	2	5.4	5.4	3.7	52.673	518	518	0	29.245	5.4	5.4	68515000	34028000	34487000	34106000	25911000	4	3	7				308	17;78;298	True;True;True	17;80;306	44;45;175;176;651;652	60;61;191;192;193;715;716	60;192;715
Q6URK4	Q6URK4	10	2	2	Heterogeneous nuclear ribonucleoprotein A3	Hnrnpa3	sp|Q6URK4|ROA3_RAT Heterogeneous nuclear ribonucleoprotein A3 OS=Rattus norvegicus OX=10116 GN=Hnrnpa3 PE=1 SV=1	1	10	2	2	7	10	2	2	2	2	26.9	8.2	8.2	39.652	379	379	0	14.142	24.5	26.9	67015000	30191000	36824000	28045000	29897000	3	2	5				332	410;411;412;914;1390;1723;2110;2563;2578;2579	False;False;False;False;True;True;False;False;False;False	421;422;423;931;1410;1750;2145;2606;2621;2622	889;890;891;892;1938;2967;2968;3664;3665;4550;4551;4552;5596;5597;5641;5642;5643;5644;5645;5646	974;975;976;977;2078;3216;3217;3218;3967;3968;4939;4940;4941;6105;6106;6151;6152;6153;6154;6155;6156	974;976;977;2078;3218;3968;4939;6106;6152;6156
Q91V33	Q91V33	3	3	3	KH domain-containing, RNA-binding, signal transduction-associated protein 1	Khdrbs1	sp|Q91V33|KHDR1_RAT KH domain-containing, RNA-binding, signal transduction-associated protein 1 OS=Rattus norvegicus OX=10116 GN=Khdrbs1 PE=1 SV=1	1	3	3	3	2	2	2	2	2	2	8.4	8.4	8.4	48.315	443	443	0	18.927	5.9	5.6	66778000	29945000	36833000	21510000	36192000	2	3	5				339	624;1355;1838	True;True;True	637;1374;1866	1323;2886;3932;3933;3934	1435;3131;4277;4278;4279	1435;3131;4278
A0A0G2JSR7;P43244	A0A0G2JSR7;P43244	5;5	5;5	5;5	Matrin-3	Matr3	tr|A0A0G2JSR7|A0A0G2JSR7_RAT Matrin-3 OS=Rattus norvegicus OX=10116 GN=Matr3 PE=1 SV=1;sp|P43244|MATR3_RAT Matrin-3 OS=Rattus norvegicus OX=10116 GN=Matr3 PE=1 SV=2	2	5	5	5	5	5	5	5	5	5	8.2	8.2	8.2	94.501	845	845;845	0	33.669	8.2	8.2	65100000	23569000	41531000	23113000	31754000	5	5	10				9	360;754;1405;1903;2195	True;True;True;True;True	370;769;1425;1935;2231	795;796;1589;1590;2999;3000;4095;4096;4715;4716	876;877;1716;1717;3250;3251;4455;4456;5142;5143	876;1716;3251;4456;5142
Q91XJ0	Q91XJ0	2	2	2	Calcium-responsive transcription coactivator	Ss18l1	sp|Q91XJ0|CREST_RAT Calcium-responsive transcription coactivator OS=Rattus norvegicus OX=10116 GN=Ss18l1 PE=1 SV=1	1	2	2	2	1	2	1	2	1	2	5.5	5.5	5.5	43.998	401	401	0	14.569	3	5.5	64654000	7620900	57033000	22424000	28178000	1	3	4				340	718;2156	True;True	733;2192	1524;1525;1526;4644	1651;1652;1653;5047	1651;5047
P0C1G9	P0C1G9	4	4	2	Transcription factor SOX-11	Sox11	sp|P0C1G9|SOX11_RAT Transcription factor SOX-11 OS=Rattus norvegicus OX=10116 GN=Sox11 PE=2 SV=1	1	4	4	2	2	4	2	4	1	2	7.6	7.6	4.3	42.599	395	395	0	37.319	6.3	7.6	64157000	10357000	53800000	19343000	31559000	2	5	7				240	865;866;973;1104	True;True;True;True	882;883;991;1122	1842;1843;1844;2072;2073;2343;2344	1982;1983;1984;2218;2219;2508;2509	1983;1984;2219;2508
D3ZBK4;D4A484	D3ZBK4	5;1	5;1	5;1		Ikzf5	tr|D3ZBK4|D3ZBK4_RAT IKAROS family zinc finger 5 OS=Rattus norvegicus OX=10116 GN=Ikzf5 PE=1 SV=1	2	5	5	5	0	5	0	5	0	5	8.1	8.1	8.1	46.556	419	419;403	0	31.344	0	8.1	63984000	0	63984000	0	48218000	0	5	5				119	859;940;1130;1175;2318	True;True;True;True;True	876;957;1148;1193;2357	1835;2003;2398;2529;4996	1975;2146;2564;2733;5447	1975;2146;2564;2733;5447
A0A0G2K4R7;Q5PQP1;F1LU19;F1M2F1;F1LYR6;F1LVI3	A0A0G2K4R7;Q5PQP1	4;4;1;1;1;1	4;4;1;1;1;1	4;4;1;1;1;1	RNA-binding motif, single-stranded-interacting protein 1	Rbms1	tr|A0A0G2K4R7|A0A0G2K4R7_RAT RNA-binding motif, single-stranded-interacting protein 1 OS=Rattus norvegicus OX=10116 GN=Rbms1 PE=1 SV=1;sp|Q5PQP1|RBMS1_RAT RNA-binding motif, single-stranded-interacting protein 1 OS=Rattus norvegicus OX=10116 GN=Rbms1 PE=2	6	4	4	4	4	4	4	4	4	4	12.7	12.7	12.7	43.775	403	403;403;398;414;430;444	0	31.535	12.7	12.7	62886000	29562000	33324000	26679000	27996000	5	5	10				46	113;819;1388;2451	True;True;True;True	116;835;1408;2491	252;253;1741;1742;2962;2963;5361;5362;5363;5364	279;280;1878;1879;3209;3210;5857;5858;5859;5860	280;1879;3210;5860
G3V6T6;Q63379	G3V6T6;Q63379	3;3	3;3	3;3	N-myc proto-oncogene protein	Mycn	tr|G3V6T6|G3V6T6_RAT N-myc proto-oncogene protein OS=Rattus norvegicus OX=10116 GN=Mycn PE=4 SV=1;sp|Q63379|MYCN_RAT N-myc proto-oncogene protein OS=Rattus norvegicus OX=10116 GN=Mycn PE=3 SV=1	2	3	3	3	2	3	2	3	2	3	6.3	6.3	6.3	49.678	462	462;462	0	18.489	3.9	6.3	61986000	21833000	40153000	22989000	29104000	2	3	5				211	193;959;2308	True;True;True	200;976;2347	433;434;2037;4979;4980	478;479;2183;5429;5430	479;2183;5430
F1M4Q7	F1M4Q7	6	6	6		Setbp1	tr|F1M4Q7|F1M4Q7_RAT SET-binding protein 1 OS=Rattus norvegicus OX=10116 GN=Setbp1 PE=4 SV=3	1	6	6	6	3	6	3	6	3	6	7.6	7.6	7.6	141.57	1295	1295	0	43.225	3.3	7.6	60084000	20112000	39972000	21137000	29098000	3	6	9				197	137;334;400;1147;1258;1414	True;True;True;True;True;True	141;343;411;1165;1277;1434	304;727;868;869;2449;2682;2683;3016;3017	331;794;950;951;2618;2889;2890;3267;3268	331;794;951;2618;2889;3268
F1MAJ8	F1MAJ8	3	3	3		Zfp91	tr|F1MAJ8|F1MAJ8_RAT Zinc finger protein 91 OS=Rattus norvegicus OX=10116 GN=Zfp91 PE=1 SV=2	1	3	3	3	2	3	2	3	2	3	6.2	6.2	6.2	63.193	568	568	0	24.517	3.7	6.2	59306000	22822000	36484000	24411000	25905000	2	2	4				203	277;1111;2177	True;True;True	285;1129;2213	597;2358;2359;4687;4688	650;2523;2524;5113;5114	650;2523;5114
F1LYQ2;F1LQU1;O88553	F1LYQ2;F1LQU1;O88553	6;6;5	6;6;5	6;6;5	Zinc finger protein 37	Zfp37	tr|F1LYQ2|F1LYQ2_RAT Zinc finger protein 37 OS=Rattus norvegicus OX=10116 GN=Zfp37 PE=4 SV=3;tr|F1LQU1|F1LQU1_RAT Zinc finger protein 37 OS=Rattus norvegicus OX=10116 GN=Zfp37 PE=4 SV=3;sp|O88553|ZFP37_RAT Zinc finger protein 37 OS=Rattus norvegicus OX=101	3	6	6	6	5	5	5	5	5	5	13.6	13.6	13.6	48.432	425	425;583;601	0	39.809	9.6	13.4	58958000	31692000	27266000	29367000	22873000	6	5	11				185	879;1955;2020;2099;2100;2453	True;True;True;True;True;True	896;1987;2053;2134;2135;2493	1865;1866;4205;4206;4350;4522;4523;4524;5366;5367;5368	2005;2006;4571;4572;4721;4906;4907;4908;5862;5863;5864	2006;4572;4721;4906;4908;5864
E9PTE1;F1MAQ7	E9PTE1;F1MAQ7	4;4	4;4	4;4		Son	tr|E9PTE1|E9PTE1_RAT Son DNA-binding protein OS=Rattus norvegicus OX=10116 GN=Son PE=1 SV=2;tr|F1MAQ7|F1MAQ7_RAT Son DNA-binding protein OS=Rattus norvegicus OX=10116 GN=Son PE=1 SV=2	2	4	4	4	3	3	3	3	3	3	2.5	2.5	2.5	252.64	2323	2323;2446	0	23.919	2.2	2.1	57983000	25098000	32885000	26093000	23787000	4	3	7				177	2035;2036;2037;2588	True;True;True;True	2068;2069;2070;2632	4379;4380;4381;4382;4383;5666	4750;4751;4752;4753;4754;4755;6176	4752;4754;4755;6176
P62282	P62282	5	5	5	40S ribosomal protein S11	Rps11	sp|P62282|RS11_RAT 40S ribosomal protein S11 OS=Rattus norvegicus OX=10116 GN=Rps11 PE=1 SV=3	1	5	5	5	0	5	0	5	0	5	39.2	39.2	39.2	18.431	158	158	0	31.107	0	39.2	57267000	0	57267000	0	43157000	0	6	6				272	257;378;393;970;2448	True;True;True;True;True	265;389;404;988;2488	560;829;854;2063;5356;5357	612;910;936;2209;5852;5853	612;910;936;2209;5852
A0A096MIY0	A0A096MIY0	2	1	1		Dlx6	tr|A0A096MIY0|A0A096MIY0_RAT Distal-less homeobox 6 OS=Rattus norvegicus OX=10116 GN=Dlx6 PE=4 SV=1	1	2	1	1	1	2	1	1	1	1	12.6	8.6	8.6	19.677	175	175	0.0034602	8.1333	8.6	12.6	56145000	32216000	23930000	32216000	18033000	1	2	3				2	1023;2054	False;True	1041;2087	2160;4414;4415	2317;4787;4788;4789	2317;4787
M0R9Q1;M0R3R6	M0R9Q1	6;2	6;2	6;2		LOC100911677	tr|M0R9Q1|M0R9Q1_RAT RCG48334, isoform CRA_e OS=Rattus norvegicus OX=10116 GN=Rbm14 PE=1 SV=1	2	6	6	6	5	3	5	3	5	3	9.4	9.4	9.4	69.493	669	669;601	0	36.45	7.6	4.6	55811000	36254000	19557000	26642000	24350000	7	4	11				229	29;195;1210;1330;1756;2299	True;True;True;True;True;True	29;202;1229;1349;1783;2337	71;72;73;438;2598;2599;2600;2601;2820;3737;4945	87;88;89;483;2805;2806;2807;2808;3032;4046;5388	87;483;2808;3032;4046;5388
D3ZKU5;A0A0G2K7E3;D3ZVY6;D3ZX87;P62902;D3ZDE9;D3ZK34;D3ZU04;D3Z8W1;D4ACQ2;D4ABZ9;D3ZZ60;D3ZVF5	D3ZKU5;A0A0G2K7E3;D3ZVY6;D3ZX87;P62902;D3ZDE9;D3ZK34;D3ZU04;D3Z8W1;D4ACQ2;D4ABZ9;D3ZZ60;D3ZVF5	2;2;2;2;2;1;1;1;1;1;1;1;1	2;2;2;2;2;1;1;1;1;1;1;1;1	2;2;2;2;2;1;1;1;1;1;1;1;1	60S ribosomal protein L31	RGD1564839;LOC100359986;LOC100910017;Rpl31;RGD1562055;RGD1565894;LOC102550734;LOC680384;LOC690384;Rpl31l4;LOC681356;Rpl31l3	tr|D3ZKU5|D3ZKU5_RAT Similar to ribosomal protein L31 OS=Rattus norvegicus OX=10116 GN=RGD1564839 PE=4 SV=1;tr|A0A0G2K7E3|A0A0G2K7E3_RAT Uncharacterized protein OS=Rattus norvegicus OX=10116 PE=4 SV=1;tr|D3ZVY6|D3ZVY6_RAT Ribosomal protein L31-like OS=Ratt	13	2	2	2	2	2	2	2	2	2	14.5	14.5	14.5	14.275	124	124;125;126;143;125;117;117;124;124;125;125;125;125	0	11.655	14.5	14.5	55354000	26202000	29151000	26013000	22157000	2	2	4				56	523;1820	True;True	535;1848	1119;1120;3889;3890	1225;1226;4222;4223	1225;4222
B2GV37	B2GV37	3	3	3		Zfp593	tr|B2GV37|B2GV37_RAT Zinc finger protein 593 OS=Rattus norvegicus OX=10116 GN=Zfp593 PE=1 SV=1	1	3	3	3	2	2	2	2	2	2	31.3	31.3	31.3	15.293	134	134	0	20.486	17.9	20.1	53594000	25245000	28350000	26563000	20046000	2	2	4				94	306;1259;2561	True;True;True	314;1278;2604	665;2684;5592;5593	729;2891;6101;6102	729;2891;6102
F1M013;D4A6B9;D3ZU22;D3ZJH5;D3ZPL5;P62425;F1M1M2;D3ZNA3;F1M2Q3;M0R3M3;F1M4C7	F1M013;D4A6B9;D3ZU22;D3ZJH5;D3ZPL5;P62425;F1M1M2;D3ZNA3;F1M2Q3	4;4;4;4;4;4;3;3;3;1;1	4;4;4;4;4;4;3;3;3;1;1	4;4;4;4;4;4;3;3;3;1;1	60S ribosomal protein L7a	LOC100910109;LOC680161;LOC100361311;LOC100911966;RGD1562953;Rpl7a;RGD1563220;LOC100911987;RGD1564370	tr|F1M013|F1M013_RAT 60S ribosomal protein L7a OS=Rattus norvegicus OX=10116 GN=Rpl7a PE=4 SV=2;tr|D4A6B9|D4A6B9_RAT Uncharacterized protein OS=Rattus norvegicus OX=10116 PE=4 SV=1;tr|D3ZU22|D3ZU22_RAT 60S ribosomal protein L7a-like OS=Rattus norvegicus OX	11	4	4	4	4	4	4	4	4	4	9.8	9.8	9.8	29.864	265	265;266;266;267;270;266;266;266;266;262;266	0	24.777	9.8	9.8	53481000	26062000	27419000	26161000	20564000	4	4	8				137	1180;1497;2369;2370	True;True;True;True	1198;1522;2408;2409	2536;2537;3178;3179;5122;5123;5124;5125	2740;2741;3445;3446;5594;5595;5596;5597	2740;3445;5595;5596
D4A3D8	D4A3D8	4	4	4		Xpc	tr|D4A3D8|D4A3D8_RAT XPC complex subunit, DNA damage recognition and repair factor OS=Rattus norvegicus OX=10116 GN=Xpc PE=1 SV=1	1	4	4	4	1	4	1	4	1	4	4.3	4.3	4.3	104.86	933	933	0	27.869	1.8	4.3	50357000	7994900	42362000	7994900	31924000	1	5	6				162	505;956;957;2550	True;True;True;True	517;973;974;2593	1078;2030;2031;2032;2033;5570	1181;2176;2177;2178;2179;6076	1181;2176;2178;6076
D4A919;D3ZNS5	D4A919	5;2	5;2	5;2		Scrt1	tr|D4A919|D4A919_RAT Scratch family transcriptional repressor 1 OS=Rattus norvegicus OX=10116 GN=Scrt1 PE=4 SV=1	2	5	5	5	1	5	1	5	1	5	20.4	20.4	20.4	35.945	348	348;305	0	39.114	2.9	20.4	49751000	2526800	47224000	2526800	35588000	1	5	6				170	25;109;690;890;2350	True;True;True;True;True	25;112;705;907;2389	63;242;1465;1888;5089;5090	79;269;1590;2028;5561;5562	79;269;1590;2028;5562
A0A0G2K1R2;B1H245	A0A0G2K1R2;B1H245	2;1	2;1	2;1		Bcl7b	tr|A0A0G2K1R2|A0A0G2K1R2_RAT BCL tumor suppressor 7A OS=Rattus norvegicus OX=10116 GN=Bcl7a PE=1 SV=1;tr|B1H245|B1H245_RAT BCL tumor suppressor 7B OS=Rattus norvegicus OX=10116 GN=Bcl7b PE=1 SV=1	2	2	2	2	2	1	2	1	2	1	9.5	9.5	9.5	22.767	210	210;202	0	18.674	9.5	6.2	49569000	31910000	17659000	25193000	20025000	2	1	3				38	1422;2458	True;True	1442;2498	3028;3029;5376	3279;3280;5872	3280;5872
P70475;F1M8L4;D3ZYT5;A0A0G2KAF8;D3ZTP6;Q9QX27-2;Q9QX27	P70475;F1M8L4	8;7;1;1;1;1;1	8;7;1;1;1;1;1	8;7;1;1;1;1;1	Myelin transcription factor 1-like protein	Myt1l	sp|P70475|MYT1L_RAT Myelin transcription factor 1-like protein OS=Rattus norvegicus OX=10116 GN=Myt1l PE=1 SV=3;tr|F1M8L4|F1M8L4_RAT Myelin transcription factor 1-like protein OS=Rattus norvegicus OX=10116 GN=Myt1l PE=4 SV=3	7	8	8	8	8	1	8	1	8	1	7.7	7.7	7.7	132.92	1187	1187;952;922;1032;1044;1024;1032	0	49.546	7.7	0.9	48176000	46595000	1580500	46456000	1329900	8	0	8				282	497;1241;1372;1373;1550;1830;2019;2312	True;True;True;True;True;True;True;True	509;1260;1391;1392;1576;1858;2052;2351	1066;2654;2917;2918;3304;3912;3913;3914;4349;4985	1169;2861;3164;3165;3575;4256;4257;4258;4720;5435	1169;2861;3164;3165;3575;4256;4720;5435
B2GUY9	B2GUY9	5	4	4		Klf16	tr|B2GUY9|B2GUY9_RAT Klf16 protein OS=Rattus norvegicus OX=10116 GN=Klf16 PE=2 SV=1	1	5	4	4	0	5	0	4	0	4	21.9	18.3	18.3	25.559	251	251	0	23.415	0	21.9	47254000	0	47254000	0	35611000	0	3	3				93	527;605;775;1957;2114	False;True;True;True;True	539;618;791;1989;2149	1125;1278;1642;4208;4558	1231;1384;1776;4574;4947	1231;1384;1776;4574;4947
D3ZQ79	D3ZQ79	5	5	5		Prdm10	tr|D3ZQ79|D3ZQ79_RAT PR/SET domain 10 OS=Rattus norvegicus OX=10116 GN=Prdm10 PE=1 SV=3	1	5	5	5	2	5	2	5	2	5	4.3	4.3	4.3	129.69	1146	1146	0	33.276	1.7	4.3	46438000	16759000	29678000	18188000	20937000	2	5	7				142	749;1011;1228;1409;1516	True;True;True;True;True	764;1029;1247;1429;1542	1581;2137;2138;2633;2634;3006;3222	1708;2294;2295;2840;2841;3257;3489	1708;2294;2841;3257;3489
D3ZDQ2;D4A7B5;D3ZTX2	D3ZDQ2	4;1;1	4;1;1	3;0;0		Nkx2-2	tr|D3ZDQ2|D3ZDQ2_RAT NK2 homeobox 2 OS=Rattus norvegicus OX=10116 GN=Nkx2-2 PE=4 SV=1	3	4	4	3	3	3	3	3	2	3	9.9	9.9	7.3	30.196	273	273;234;353	0	24.641	5.9	7.3	45061000	22985000	22076000	17386000	22235000	4	3	7				125	198;199;747;1022	True;True;True;True	205;206;762;1040	442;443;444;445;446;1578;2159	487;488;489;490;491;1705;2316	488;491;1705;2316
A0A0G2K376;Q5U317	A0A0G2K376;Q5U317	1;1	1;1	1;1	Pre-mRNA 3-end-processing factor FIP1	Fip1l1	tr|A0A0G2K376|A0A0G2K376_RAT Pre-mRNA 3-end-processing factor FIP1 OS=Rattus norvegicus OX=10116 GN=Fip1l1 PE=1 SV=1;sp|Q5U317|FIP1_RAT Pre-mRNA 3-end-processing factor FIP1 OS=Rattus norvegicus OX=10116 GN=Fip1l1 PE=1 SV=1	2	1	1	1	1	1	1	1	1	1	4.1	4.1	4.1	64.958	581	581;536	0.0036232	10.831	4.1	4.1	44354000	16470000	27884000	16470000	21014000	1	1	2				41	1980	TRUE	2013	4265;4266	4636;4637	4637
P25977-2;P25977	P25977-2;P25977	7;7	7;7	7;7	Nucleolar transcription factor 1	Ubtf	sp|P25977-2|UBF1_RAT Isoform UBF2 of Nucleolar transcription factor 1 OS=Rattus norvegicus OX=10116 GN=Ubtf;sp|P25977|UBF1_RAT Nucleolar transcription factor 1 OS=Rattus norvegicus OX=10116 GN=Ubtf PE=1 SV=1	2	7	7	7	0	7	0	7	0	7	10.5	10.5	10.5	84.967	727	727;764	0	45.421	0	10.5	44069000	0	44069000	0	33210000	0	7	7				253	315;570;576;1003;1261;1471;2582	True;True;True;True;True;True;True	323;583;589;1021;1280;1495;2625	682;1216;1224;2126;2686;3115;5652	746;1322;1330;2280;2893;3372;6162	746;1322;1330;2280;2893;3372;6162
D3ZZK5	D3ZZK5	1	1	1		Zfp41	tr|D3ZZK5|D3ZZK5_RAT Zinc finger protein 41 OS=Rattus norvegicus OX=10116 GN=Zfp41 PE=4 SV=1	1	1	1	1	1	1	1	1	1	1	3.5	3.5	3.5	22.873	198	198	0.005848	6.0762	3.5	3.5	42587000	17616000	24971000	17616000	18818000	1	1	2				154	1386	TRUE	1406	2959;2960	3206;3207	3207
M0RBF0;A0A0G2JZI0;O88453;A0A0G2JW97	M0RBF0;A0A0G2JZI0;O88453;A0A0G2JW97	7;7;6;5	7;7;6;5	7;7;6;5	Scaffold attachment factor B1	Safb	tr|M0RBF0|M0RBF0_RAT Scaffold attachment factor B1 OS=Rattus norvegicus OX=10116 GN=Safb PE=1 SV=1;tr|A0A0G2JZI0|A0A0G2JZI0_RAT Scaffold attachment factor B OS=Rattus norvegicus OX=10116 GN=Safb PE=1 SV=1;sp|O88453|SAFB1_RAT Scaffold attachment factor B1 O	4	7	7	7	6	3	6	3	6	3	11.1	11.1	11.1	104.41	931	931;940;931;838	0	50.726	7.9	6	42437000	30557000	11879000	24489000	15020000	6	3	9				29	57;304;783;1464;1503;1536;1985	True;True;True;True;True;True;True	59;312;799;1488;1529;1562;2018	124;660;661;1655;3106;3191;3192;3268;4277	140;724;725;1789;3363;3458;3459;3535;4648	140;724;1789;3363;3458;3535;4648
A0A0H2UHH9;D4ACJ1;P62850-2;P62850-3;P62850	A0A0H2UHH9;D4ACJ1;P62850-2;P62850-3;P62850	3;3;3;3;3	3;3;3;3;3	3;3;3;3;3	40S ribosomal protein S24	LOC100363469;Rps24	tr|A0A0H2UHH9|A0A0H2UHH9_RAT 40S ribosomal protein S24 OS=Rattus norvegicus OX=10116 GN=Rps24 PE=3 SV=1;tr|D4ACJ1|D4ACJ1_RAT 40S ribosomal protein S24 OS=Rattus norvegicus OX=10116 GN=LOC100363469 PE=3 SV=1;sp|P62850-2|RS24_RAT Isoform 2 of 40S ribosomal p	5	3	3	3	2	2	2	2	2	2	12.2	12.2	12.2	15.197	131	131;133;130;131;133	0	19.246	6.1	11.5	40293000	36375000	3917300	36375000	0	2	1	3				70	841;842;1441	True;True;True	858;859;1461	1799;1800;1801;3063	1939;1940;1941;3314	1940;1941;3314
B1WBW3	B1WBW3	2	2	2		Zfp579	tr|B1WBW3|B1WBW3_RAT Zfp579 protein OS=Rattus norvegicus OX=10116 GN=Zfp579 PE=2 SV=1	1	2	2	2	1	2	1	2	1	2	5.9	5.9	5.9	60.862	562	562	0	24.446	3	5.9	36439000	8631300	27808000	9569900	20017000	1	2	3				91	828;857	True;True	845;874	1771;1831;1832	1910;1971;1972	1910;1972
A0A0G2JWU7;Q62655;A0A0G2JXN5;A0A0G2K188;P51514-3;P51514-2;P51514;A0A0G2K030;P21677	A0A0G2JWU7;Q62655;A0A0G2JXN5	11;10;9;2;2;2;2;1;1	1;0;0;0;0;0;0;0;0	1;0;0;0;0;0;0;0;0	Transcription factor 4	Tcf4	tr|A0A0G2JWU7|A0A0G2JWU7_RAT Transcription factor 4 OS=Rattus norvegicus OX=10116 GN=Tcf4 PE=1 SV=1;sp|Q62655|ITF2_RAT Transcription factor 4 OS=Rattus norvegicus OX=10116 GN=Tcf4 PE=1 SV=2;tr|A0A0G2JXN5|A0A0G2JXN5_RAT Transcription factor 4 OS=Rattus norv	9	11	1	1	4	9	1	1	1	1	27.5	2.8	2.8	71.481	669	669;589;548;537;682;706;707;649;649	0.0035587	10.537	11.1	21.4	35795000	14156000	21639000	14156000	16307000	1	1	2				21	138;798;802;877;910;1230;1346;1472;1506;1946;2477	False;False;False;False;False;False;False;False;True;False;False	142;814;818;894;927;1249;1365;1496;1532;1978;2517	305;1688;1695;1862;1931;1932;2636;2637;2854;3116;3117;3118;3119;3196;3197;4183;5417	332;1822;1829;2002;2071;2072;2843;2844;3069;3373;3374;3375;3376;3463;3464;4547;5918	332;1822;1829;2002;2071;2844;3069;3375;3463;4547;5918
Q5XIW8	Q5XIW8	4	4	4	U4/U6.U5 tri-snRNP-associated protein 1	Sart1	sp|Q5XIW8|SNUT1_RAT U4/U6.U5 tri-snRNP-associated protein 1 OS=Rattus norvegicus OX=10116 GN=Sart1 PE=1 SV=1	1	4	4	4	2	4	2	4	2	4	7.9	7.9	7.9	91.01	806	806	0	30.925	4.7	7.9	35367000	11044000	24323000	14454000	14920000	2	4	6				315	219;392;449;729	True;True;True;True	227;403;461;744	486;487;852;853;974;1543	532;533;934;935;1072;1670	532;934;1072;1670
A0A0G2K842;G3V6C7;A0A0G2KAB3;Q05310	A0A0G2K842;G3V6C7;A0A0G2KAB3;Q05310	2;2;2;2	2;2;2;2	2;2;2;2	Leydig cell tumor 10 kDa protein	LOC288913	tr|A0A0G2K842|A0A0G2K842_RAT Uncharacterized protein OS=Rattus norvegicus OX=10116 PE=4 SV=1;tr|G3V6C7|G3V6C7_RAT Similar to LEYDIG CELL TUMOR 10 KD PROTEIN OS=Rattus norvegicus OX=10116 GN=LOC288913 PE=4 SV=1;tr|A0A0G2KAB3|A0A0G2KAB3_RAT Uncharacterized p	4	2	2	2	1	2	1	2	1	2	18.5	18.5	18.5	9.8306	92	92;93;94;93	0	12.098	10.9	18.5	35302000	5745100	29557000	14319000	13700000	1	2	3				59	1108;2005	True;True	1126;2038	2351;2352;4321	2516;2517;4692	2516;4692
D4A5R3	D4A5R3	4	4	4		Ahdc1	tr|D4A5R3|D4A5R3_RAT AT hook, DNA-binding motif,-containing 1 OS=Rattus norvegicus OX=10116 GN=Ahdc1 PE=1 SV=1	1	4	4	4	1	4	1	4	1	4	4.5	4.5	4.5	168.17	1592	1592	0	30.814	1.3	4.5	35273000	3951000	31322000	6853400	20702000	1	4	5				166	303;770;1218;2508	True;True;True;True	311;786;1237;2549	659;1630;2617;5482;5483	723;1760;2824;5985;5986	723;1760;2824;5985
A0A0G2JWK6	A0A0G2JWK6	4	4	4			tr|A0A0G2JWK6|A0A0G2JWK6_RAT APC membrane recruitment protein 2 OS=Rattus norvegicus OX=10116 GN=Amer2 PE=1 SV=1	1	4	4	4	2	3	2	3	2	3	7.9	7.9	7.9	53.714	509	509	0	23.138	2.9	6.5	34108000	20097000	14012000	18143000	12513000	2	3	5				20	701;730;1215;1527	True;True;True;True	716;745;1234;1553	1486;1544;1545;2612;3246	1613;1671;1672;2819;3513	1613;1671;2819;3513
D4A148	D4A148	4	4	4		Zfr2	tr|D4A148|D4A148_RAT Zinc finger RNA-binding protein 2 OS=Rattus norvegicus OX=10116 GN=Zfr2 PE=1 SV=3	1	4	4	4	3	3	3	3	3	3	6.6	6.6	6.6	89.816	819	819	0	23.228	4.8	5.1	32341000	18056000	14285000	17859000	10962000	3	3	6				158	93;345;878;1254	True;True;True;True	95;354;895;1273	203;748;749;1863;1864;2676	225;815;816;2003;2004;2883	225;815;2003;2883
P52631	P52631	1	1	1	Signal transducer and activator of transcription 3	Stat3	sp|P52631|STAT3_RAT Signal transducer and activator of transcription 3 OS=Rattus norvegicus OX=10116 GN=Stat3 PE=1 SV=1	1	1	1	1	1	1	1	1	1	1	1	1	1	88.039	770	770	0.0058997	6.1066	1	1	31209000	18156000	13053000	18156000	9836600	0	1	1				260	1806	TRUE	1834	3858;3859	4187;4188	4187
A0A0G2K850;B1WC50;A0A140UHY3	A0A0G2K850;B1WC50;A0A140UHY3	1;1;1	1;1;1	1;1;1		Ewsr1	tr|A0A0G2K850|A0A0G2K850_RAT EWS RNA-binding protein 1 OS=Rattus norvegicus OX=10116 GN=LOC100912481 PE=1 SV=1;tr|B1WC50|B1WC50_RAT EWS RNA-binding protein 1 OS=Rattus norvegicus OX=10116 GN=Ewsr1 PE=1 SV=1;tr|A0A140UHY3|A0A140UHY3_RAT EWS RNA-binding prot	3	1	1	1	1	1	1	1	1	1	2.3	2.3	2.3	67.94	651	651;655;661	0.0033784	7.5929	2.3	2.3	30598000	14153000	16445000	13919000	12627000	2	2	4				60	35	TRUE	35	83;84;85;86	99;100;101;102	101
O35821	O35821	4	4	4	Myb-binding protein 1A	Mybbp1a	sp|O35821|MBB1A_RAT Myb-binding protein 1A OS=Rattus norvegicus OX=10116 GN=Mybbp1a PE=1 SV=2	1	4	4	4	3	4	3	4	3	4	4.5	4.5	4.5	152.28	1344	1344	0	29.901	3.4	4.5	29863000	11339000	18524000	11895000	13404000	2	4	6				235	161;176;1341;2055	True;True;True;True	166;181;1360;2088	361;362;397;2838;2839;4416;4417	396;397;435;3051;3052;4790;4791	396;435;3052;4791
R9PXZ9;Q3KRF1	R9PXZ9;Q3KRF1	3;3	3;3	3;3	Sp110 nuclear body protein	Sp110	tr|R9PXZ9|R9PXZ9_RAT Sp110 nuclear body protein OS=Rattus norvegicus OX=10116 GN=Sp110 PE=1 SV=2;sp|Q3KRF1|SP110_RAT Sp110 nuclear body protein OS=Rattus norvegicus OX=10116 GN=Sp110 PE=1 SV=1	2	3	3	3	1	3	1	3	1	3	9.4	9.4	9.4	53.162	478	478;478	0	27.473	2.7	9.4	29766000	3419300	26347000	7338400	15936000	1	3	4				293	265;1436;2004	True;True;True	273;1456;2037	574;3056;4319;4320	627;3307;4690;4691	627;3307;4691
Q9ESZ0	Q9ESZ0	3	3	3	DNA repair protein XRCC1	Xrcc1	sp|Q9ESZ0|XRCC1_RAT DNA repair protein XRCC1 OS=Rattus norvegicus OX=10116 GN=Xrcc1 PE=1 SV=2	1	3	3	3	2	3	2	3	2	3	9.5	9.5	9.5	68.835	631	631	0	25.902	7.3	9.5	29730000	5596600	24134000	7554000	16230000	2	3	5				345	31;245;2276	True;True;True	31;253;2314	75;76;528;4894;4895	91;92;579;5328;5329	91;579;5329
A0A0U1RRZ5;Q6MG48	A0A0U1RRZ5;Q6MG48	3;3	3;3	3;3	Protein PRRC2A	Prrc2a	tr|A0A0U1RRZ5|A0A0U1RRZ5_RAT Protein PRRC2A OS=Rattus norvegicus OX=10116 GN=Prrc2a PE=1 SV=1;sp|Q6MG48|PRC2A_RAT Protein PRRC2A OS=Rattus norvegicus OX=10116 GN=Prrc2a PE=1 SV=1	2	3	3	3	3	1	3	1	3	1	2.3	2.3	2.3	229.17	2162	2162;2161	0	32.95	2.3	1	29523000	25565000	3958400	23424000	5123700	4	1	5				83	88;241;506	True;True;True	90;249;518	193;522;523;524;1079	213;573;574;575;1182	213;573;1182
A0A0G2K904	A0A0G2K904	4	4	4			tr|A0A0G2K904|A0A0G2K904_RAT RCG56631, isoform CRA_d OS=Rattus norvegicus OX=10116 GN=Sltm PE=1 SV=1	1	4	4	4	3	2	3	2	3	2	6.1	6.1	6.1	117.17	1034	1034	0	32.453	4.4	2.8	29275000	14042000	15233000	15510000	10011000	1	2	3				63	2;899;1523;2213	True;True;True;True	2;916;1549;2250	2;1904;1905;3239;4763	2;2044;2045;3506;5196	2;2045;3506;5196
A0A0U1RRZ7;A0A0G2K1E8	A0A0U1RRZ7;A0A0G2K1E8	2;2	2;2	2;2			tr|A0A0U1RRZ7|A0A0U1RRZ7_RAT Coiled-coil domain-containing 92B (Fragment) OS=Rattus norvegicus OX=10116 GN=Ccdc92b PE=4 SV=1;tr|A0A0G2K1E8|A0A0G2K1E8_RAT Coiled-coil domain-containing 92B OS=Rattus norvegicus OX=10116 GN=Ccdc92b PE=4 SV=1	2	2	2	2	0	2	0	2	0	2	8.1	8.1	8.1	19.642	173	173;298	0	12.607	0	8.1	28899000	0	28899000	0	21778000	0	2	2				36	1792;1956	True;True	1820;1988	3825;4207	4151;4573	4151;4573
Q2HWF0-3;Q2HWF0;Q2HWF0-2	Q2HWF0-3;Q2HWF0;Q2HWF0-2	1;1;1	1;1;1	1;1;1	Formin-binding protein 1-like	Fnbp1l	sp|Q2HWF0-3|FBP1L_RAT Isoform 3 of Formin-binding protein 1-like OS=Rattus norvegicus OX=10116 GN=Fnbp1l;sp|Q2HWF0|FBP1L_RAT Formin-binding protein 1-like OS=Rattus norvegicus OX=10116 GN=Fnbp1l PE=1 SV=2;sp|Q2HWF0-2|FBP1L_RAT Isoform 2 of Formin-binding p	3	1	1	1	1	0	1	0	1	0	3.1	3.1	3.1	63.947	551	551;605;609	1	-2	3.1	0	28572000	28572000	0	28572000	0	1	0	1	+			290	512	TRUE	524	1090	1193	1193	33	102
A0A096MKH8;A0A096MJI1;A0A096MJV6;A0A0G2K3V6;D3ZHB2	A0A096MKH8;A0A096MJI1;A0A096MJV6;A0A0G2K3V6	3;3;3;2;1	3;3;3;2;1	3;3;3;2;1		Zfx	tr|A0A096MKH8|A0A096MKH8_RAT Zinc finger protein X-linked (Fragment) OS=Rattus norvegicus OX=10116 GN=Zfx PE=4 SV=1;tr|A0A096MJI1|A0A096MJI1_RAT Zinc finger protein X-linked OS=Rattus norvegicus OX=10116 GN=Zfx PE=1 SV=1;tr|A0A096MJV6|A0A096MJV6_RAT Zinc f	5	3	3	3	3	2	3	2	3	2	6.1	6.1	6.1	56.834	491	491;749;799;781;805	0	20.951	6.1	3.9	28520000	9508600	19012000	9243200	11199000	3	3	6				3	850;869;1778	True;True;True	867;886;1806	1813;1814;1815;1848;3788;3789	1953;1954;1955;1988;4102;4103	1953;1988;4103
A0A0G2K5E5;Q6MG07	A0A0G2K5E5;Q6MG07	2;2	2;2	2;2	Proline-rich protein 3	Prr3	tr|A0A0G2K5E5|A0A0G2K5E5_RAT Proline-rich protein 3 OS=Rattus norvegicus OX=10116 GN=Prr3 PE=4 SV=1;sp|Q6MG07|PRR3_RAT Proline-rich protein 3 OS=Rattus norvegicus OX=10116 GN=Prr3 PE=2 SV=1	2	2	2	2	0	2	0	2	0	2	18.2	18.2	18.2	17.267	154	154;186	0	11.626	0	18.2	28435000	0	28435000	0	21429000	0	2	2				49	2159;2556	True;True	2195;2599	4647;5582	5050;6091	5050;6091
F2Z3R4;A0A0G2K1B6	F2Z3R4;A0A0G2K1B6	5;3	5;3	5;3	Nuclear factor 1	Nfix	tr|F2Z3R4|F2Z3R4_RAT Nuclear factor 1 OS=Rattus norvegicus OX=10116 GN=Nf1x PE=1 SV=1;tr|A0A0G2K1B6|A0A0G2K1B6_RAT Nuclear factor 1 OS=Rattus norvegicus OX=10116 GN=Nf1x PE=1 SV=1	2	5	5	5	2	5	2	5	2	5	22.9	22.9	22.9	48.867	441	441;502	0	47.386	9.1	22.9	28242000	4812500	23429000	8027900	14441000	2	6	8				204	429;1601;1965;1974;2049	True;True;True;True;True	440;1628;1997;2007;2082	928;929;3405;3406;4233;4251;4407	1015;1016;3682;3683;4599;4600;4621;4779	1016;3683;4599;4621;4779
F1M771	F1M771	4	4	4		Rybp	tr|F1M771|F1M771_RAT RING1 and YY1-binding protein OS=Rattus norvegicus OX=10116 GN=Rybp PE=1 SV=2	1	4	4	4	1	4	1	4	1	4	32.5	32.5	32.5	27.707	255	255	0	30.443	6.3	32.5	28132000	5679900	22452000	8317600	14282000	1	4	5				198	1850;2135;2136;2310	True;True;True;True	1878;2170;2171;2349	3963;4607;4608;4609;4982	4308;5008;5009;5010;5432	4308;5008;5010;5432
Q5RJT2	Q5RJT2	1	1	1	pre-rRNA processing protein FTSJ3	Ftsj3	sp|Q5RJT2|SPB1_RAT pre-rRNA processing protein FTSJ3 OS=Rattus norvegicus OX=10116 GN=Ftsj3 PE=1 SV=1	1	1	1	1	1	1	1	1	1	1	1.1	1.1	1.1	94.766	829	829	0.0032787	6.949	1.1	1.1	28018000	13436000	14582000	13436000	10989000	1	1	2				309	693	TRUE	708	1471;1472	1598;1599	1598
A0A0G2JSH7;M0RD42;A0A0G2K179;P22771-2;P22771;P24524	A0A0G2JSH7;M0RD42;A0A0G2K179;P22771-2;P22771;P24524	1;1;1;1;1;1	1;1;1;1;1;1	1;1;1;1;1;1	Glycine receptor subunit alpha-2;Glycine receptor subunit alpha-3	Glra3;Glra2	tr|A0A0G2JSH7|A0A0G2JSH7_RAT Glycine receptor subunit alpha-2 OS=Rattus norvegicus OX=10116 GN=Glra2 PE=3 SV=1;tr|M0RD42|M0RD42_RAT Glycine receptor subunit alpha-3 OS=Rattus norvegicus OX=10116 GN=Glra3 PE=3 SV=2;tr|A0A0G2K179|A0A0G2K179_RAT Glycine recep	6	1	1	1	0	1	0	1	0	1	2.7	2.7	2.7	51.98	452	452;462;478;452;452;464	1	-2	0	2.7	27692000	0	27692000	0	20868000	0	1	1	+			8	1353	TRUE	1372	2884	3129	3129	0	174
A0A0G2K420;D3ZX15;A0A0G2K6M4;A0A0G2K2T7	A0A0G2K420;D3ZX15;A0A0G2K6M4;A0A0G2K2T7	7;7;5;5	4;4;2;2	4;4;2;2		Patz1	tr|A0A0G2K420|A0A0G2K420_RAT POZ (BTB) and AT hook-containing zinc finger 1 OS=Rattus norvegicus OX=10116 GN=Patz1 PE=4 SV=1;tr|D3ZX15|D3ZX15_RAT POZ (BTB) and AT hook-containing zinc finger 1 OS=Rattus norvegicus OX=10116 GN=Patz1 PE=4 SV=1;tr|A0A0G2K6M4|	4	7	4	4	3	6	0	4	0	4	11.5	8.4	8.4	58.069	537	537;641;516;537	0	26.275	3.2	11.2	26962000	0	26962000	0	20318000	0	4	4				44	39;299;357;379;380;881;1702	True;True;False;False;False;True;True	39;307;367;390;391;898;1729	94;653;787;788;789;830;831;832;1868;3609	110;717;868;869;870;911;912;913;2008;3891	110;717;869;912;913;2008;3891
D4A6N8	D4A6N8	3	3	3		Tbr1	tr|D4A6N8|D4A6N8_RAT T-box, brain, 1 OS=Rattus norvegicus OX=10116 GN=Tbr1 PE=1 SV=3	1	3	3	3	3	3	3	3	3	3	6.3	6.3	6.3	73.631	680	680	0	22.391	6.3	6.3	26702000	13650000	13052000	13904000	9581500	2	3	5				168	323;1943;1966	True;True;True	331;1975;1998	692;693;4173;4174;4234;4235	756;757;4536;4537;4601;4602	756;4536;4602
A0A0G2K1A1	A0A0G2K1A1	2	2	2			tr|A0A0G2K1A1|A0A0G2K1A1_RAT Zinc finger protein 706 OS=Rattus norvegicus OX=10116 GN=Zfp706 PE=1 SV=1	1	2	2	2	2	1	2	1	2	1	23.7	23.7	23.7	8.4977	76	76	0	12.82	23.7	14.5	26267000	14175000	12092000	11399000	11888000	2	1	3				34	19;2297	True;True	19;2335	48;49;4941	64;65;5384	65;5384
Q63689	Q63689	6	3	3	Neurogenic differentiation factor 2	Neurod2	sp|Q63689|NDF2_RAT Neurogenic differentiation factor 2 OS=Rattus norvegicus OX=10116 GN=Neurod2 PE=1 SV=2	1	6	3	3	0	6	0	3	0	3	21.7	17.8	17.8	41.466	382	382	0	23.52	0	21.7	25599000	0	25599000	0	19291000	0	3	3				323	531;744;1193;1336;1406;2521	True;True;False;False;True;False	543;759;1211;1355;1426;2564	1130;1572;2559;2828;3001;5516	1236;1699;2763;3040;3252;6022	1236;1699;2763;3040;3252;6022
Q566E4;A0A0G2K9J1;Q7TP47	Q566E4	3;1;1	3;1;1	2;1;1		Hnrnpr	tr|Q566E4|Q566E4_RAT Heterogeneous nuclear ribonucleoprotein R OS=Rattus norvegicus OX=10116 GN=Hnrnpr PE=1 SV=1	3	3	3	2	1	3	1	3	0	2	5.2	5.2	3.3	70.873	632	632;533;533	0	24.364	1.9	5.2	25389000	2426900	22962000	5790200	13941000	1	3	4				305	1027;1905;2220	True;True;True	1045;1937;2257	2165;4099;4775;4776	2322;4459;5208;5209	2322;4459;5209
M0R4V9	M0R4V9	2	2	2		Nr2e1	tr|M0R4V9|M0R4V9_RAT Nuclear receptor subfamily 2, group E, member 1 OS=Rattus norvegicus OX=10116 GN=Nr2e1 PE=3 SV=1	1	2	2	2	2	1	2	1	2	1	5.7	5.7	5.7	42.605	385	385	0	13.057	5.7	3.6	25379000	15828000	9551000	13994000	9031100	2	1	3				224	295;1934	True;True	303;1966	647;4159;4160	711;4522;4523	711;4522
Q6P3V9;P50878	Q6P3V9;P50878	1;1	1;1	1;1	60S ribosomal protein L4	Rpl4	tr|Q6P3V9|Q6P3V9_RAT 60S ribosomal protein L4 OS=Rattus norvegicus OX=10116 GN=Rpl4 PE=1 SV=1;sp|P50878|RL4_RAT 60S ribosomal protein L4 OS=Rattus norvegicus OX=10116 GN=Rpl4 PE=1 SV=3	2	1	1	1	1	1	1	1	1	1	2.6	2.6	2.6	47.3	421	421;421	0.0035211	9.3388	2.6	2.6	25361000	12321000	13040000	12321000	9827200	1	1	2				258	1938	TRUE	1970	4166;4167	4529;4530	4530
P21818	P21818	1	1	1	Stathmin-2	Stmn2	sp|P21818|STMN2_RAT Stathmin-2 OS=Rattus norvegicus OX=10116 GN=Stmn2 PE=1 SV=2	1	1	1	1	1	1	1	1	1	1	5.6	5.6	5.6	20.756	179	179	0.0031153	6.5197	5.6	5.6	25359000	9773700	15585000	9773700	11745000	1	1	2				251	141	TRUE	145	308;309	335;336	335
D4A633	D4A633	6	1	1		Zfp362	tr|D4A633|D4A633_RAT Similar to Cas-associated zinc finger protein (Predicted), isoform CRA_b OS=Rattus norvegicus OX=10116 GN=Zfp362 PE=1 SV=1	1	6	1	1	2	6	0	1	0	1	12.7	3.1	3.1	45.672	418	418	0.0032895	6.9516	4.5	12.7	25356000	0	25356000	0	19108000	0	1	1				167	72;259;936;1657;1874;1904	True;False;False;False;False;False	74;267;953;1684;1902;1936	162;564;1991;1992;1993;3524;3525;4009;4097;4098	178;616;2134;2135;2136;3803;3804;4354;4457;4458	178;616;2136;3803;4354;4457
D4A9G1;P21531	D4A9G1;P21531	2;2	2;2	2;2	60S ribosomal protein L3	Rpl3l;Rpl3	tr|D4A9G1|D4A9G1_RAT Ribosomal protein L3-like OS=Rattus norvegicus OX=10116 GN=Rpl3l PE=3 SV=2;sp|P21531|RL3_RAT 60S ribosomal protein L3 OS=Rattus norvegicus OX=10116 GN=Rpl3 PE=1 SV=3	2	2	2	2	1	2	1	2	1	2	2.9	2.9	2.9	46.394	407	407;403	0.003663	10.964	2.7	2.9	25333000	11789000	13544000	14313000	7683100	1	2	3				171	1179;2356	True;True	1197;2395	2535;5100;5101	2739;5572;5573	2739;5573
A0A0G2K2T6;F1LRU1;A0A0G2K4U6;Q9JIL3;Q9JIL3-2	A0A0G2K2T6;F1LRU1;A0A0G2K4U6;Q9JIL3;Q9JIL3-2	2;2;2;2;2	2;2;2;2;2	2;2;2;2;2	Interleukin enhancer-binding factor 3	Ilf3	tr|A0A0G2K2T6|A0A0G2K2T6_RAT Interleukin enhancer-binding factor 3 OS=Rattus norvegicus OX=10116 GN=Ilf3 PE=1 SV=1;tr|F1LRU1|F1LRU1_RAT Interleukin enhancer-binding factor 3 OS=Rattus norvegicus OX=10116 GN=Ilf3 PE=1 SV=3;tr|A0A0G2K4U6|A0A0G2K4U6_RAT Inter	5	2	2	2	1	2	1	2	1	2	2.6	2.6	2.6	95.858	897	897;909;915;897;910	0	12.733	1.2	2.6	24619000	11564000	13055000	13662000	7740700	2	2	4				39	920;1571	True;True	937;1597	1953;3343;3344;3345	2096;3614;3615;3616	2096;3615
P60711;A0A0G2K4M6;A0A0G2K3K2;P63259;P63269;P68136;P68035;P62738	P60711;A0A0G2K4M6;A0A0G2K3K2;P63259;P63269;P68136;P68035;P62738	2;1;1;1;1;1;1;1	2;1;1;1;1;1;1;1	2;1;1;1;1;1;1;1	Actin, cytoplasmic 1;Actin, cytoplasmic 1, N-terminally processed;Actin, cytoplasmic 2;Actin, cytoplasmic 2, N-terminally processed;Actin, gamma-enteric smooth muscle;Actin, alpha skeletal muscle;Actin, alpha cardiac muscle 1;Actin, aortic smooth muscle	Actb;Actg1;Actg2;Acta1;Actc1;Acta2	sp|P60711|ACTB_RAT Actin, cytoplasmic 1 OS=Rattus norvegicus OX=10116 GN=Actb PE=1 SV=1;tr|A0A0G2K4M6|A0A0G2K4M6_RAT Actin, aortic smooth muscle OS=Rattus norvegicus OX=10116 GN=Acta2 PE=3 SV=1;tr|A0A0G2K3K2|A0A0G2K3K2_RAT Actin, cytoplasmic 1 OS=Rattus no	8	2	2	2	0	2	0	2	0	2	7.5	7.5	7.5	41.736	375	375;376;378;375;376;377;377;377	0	15.776	0	7.5	24556000	0	24556000	0	18506000	0	2	2				263	239;312	True;True	247;320	520;676	571;740	571;740
H9N1L3;H9N1L4;D3ZSY3;D4A0W4	H9N1L3;H9N1L4;D3ZSY3;D4A0W4	2;2;1;1	2;2;1;1	2;2;1;1		Bcl11b;Bcl11a	tr|H9N1L3|H9N1L3_RAT B-cell CLL/lymphoma 11B OS=Rattus norvegicus OX=10116 GN=Bcl11b PE=1 SV=1;tr|H9N1L4|H9N1L4_RAT B-cell CLL/lymphoma 11B OS=Rattus norvegicus OX=10116 GN=Bcl11b PE=1 SV=1;tr|D3ZSY3|D3ZSY3_RAT B-cell CLL/lymphoma 11A OS=Rattus norvegicus	4	2	2	2	2	2	2	2	2	2	2.7	2.7	2.7	87.223	812	812;880;835;921	0	13.39	2.7	2.7	24341000	2961400	21379000	6516800	12556000	2	2	4				220	1486;1747	True;True	1511;1774	3153;3154;3719;3720	3420;3421;4027;4028	3421;4028
P43301;P51774-2;P51774;G3V7Z9;Q00911	P43301;P51774-2;P51774	3;2;2;1;1	2;1;1;1;1	2;1;1;1;1	Early growth response protein 3;E3 SUMO-protein ligase EGR2	Egr3;Egr2	sp|P43301|EGR3_RAT Early growth response protein 3 OS=Rattus norvegicus OX=10116 GN=Egr3 PE=2 SV=1;sp|P51774-2|EGR2_RAT Isoform Short of E3 SUMO-protein ligase EGR2 OS=Rattus norvegicus OX=10116 GN=Egr2;sp|P51774|EGR2_RAT E3 SUMO-protein ligase EGR2 OS=Rat	5	3	2	2	1	3	0	2	0	2	8.5	6.2	6.2	42.606	387	387;420;470;478;478	0	12.86	2.3	8.5	24291000	0	24291000	0	18306000	0	3	3				257	591;944;1910	False;True;True	604;961;1942	1245;1246;1247;2007;4109;4110	1351;1352;1353;2150;4470;4471	1352;2150;4470
F1M1R7	F1M1R7	3	3	3		Zfp771	tr|F1M1R7|F1M1R7_RAT Zinc finger protein 771 OS=Rattus norvegicus OX=10116 GN=Zfp771 PE=4 SV=3	1	3	3	3	3	1	3	1	3	1	9.5	9.5	9.5	35.769	317	317	0	19.172	9.5	3.2	23885000	17246000	6639900	13659000	8590400	3	1	4				193	64;526;2043	True;True;True	66;538;2076	142;143;1124;4395	158;159;1230;4767	159;1230;4767
D3ZPT0;D3ZUH5	D3ZPT0;D3ZUH5	3;3	3;3	3;3		Prr36	tr|D3ZPT0|D3ZPT0_RAT Proline-rich 36 OS=Rattus norvegicus OX=10116 GN=Prr36 PE=4 SV=2;tr|D3ZUH5|D3ZUH5_RAT Proline-rich 36 OS=Rattus norvegicus OX=10116 GN=Prr36 PE=4 SV=2	2	3	3	3	3	1	3	1	3	1	4	4	4	105.21	1050	1050;1079	0	22.699	4	1.3	23813000	15297000	8516700	13229000	8485500	3	1	4				141	20;230;2452	True;True;True	20;238;2492	50;51;505;5365	66;67;555;5861	66;555;5861
A0A0G2K613;Q9EPH2	A0A0G2K613;Q9EPH2	3;3	3;3	3;3	MARCKS-related protein	Marcksl1	tr|A0A0G2K613|A0A0G2K613_RAT Uncharacterized protein OS=Rattus norvegicus OX=10116 PE=4 SV=1;sp|Q9EPH2|MRP_RAT MARCKS-related protein OS=Rattus norvegicus OX=10116 GN=Marcksl1 PE=2 SV=3	2	3	3	3	2	3	2	3	2	3	18.1	18.1	18.1	19.718	199	199;199	0	29.044	14.1	18.1	23475000	7893000	15582000	8027400	11608000	2	3	5				53	7;631;1332	True;True;True	7;644;1351	14;15;1333;1334;2822	19;20;1446;1447;3034	20;1447;3034
D4AB03	D4AB03	2	2	2		Fam120a	tr|D4AB03|D4AB03_RAT Family with sequence similarity 120A OS=Rattus norvegicus OX=10116 GN=Fam120a PE=1 SV=2	1	2	2	2	2	2	2	2	2	2	2.6	2.6	2.6	122.14	1115	1115	0	11.549	2.6	2.6	23452000	10276000	13177000	10307000	9898700	2	2	4				173	811;2066	True;True	827;2099	1718;1719;4438;4439	1852;1853;4813;4814	1853;4814
Q5RK33	Q5RK33	3	3	3		Zrsr1	tr|Q5RK33|Q5RK33_RAT Zinc finger (CCCH type), RNA-binding motif and serine/arginine-rich 1 OS=Rattus norvegicus OX=10116 GN=Zrsr1 PE=2 SV=1	1	3	3	3	3	2	3	2	3	2	7.2	7.2	7.2	50.8	428	428	0	18.833	7.2	7.2	23273000	13123000	10150000	11251000	9521500	2	2	4				310	769;1954;2092	True;True;True	785;1986;2127	1628;1629;4204;4503;4504	1758;1759;4570;4880;4881	1759;4570;4881
G3V7H8;Q00900	G3V7H8;Q00900	4;4	4;4	4;4	Human immunodeficiency virus type I enhancer-binding protein 2 homolog	Hivep2	tr|G3V7H8|G3V7H8_RAT Human immunodeficiency virus type I enhancer-binding protein 2 homolog OS=Rattus norvegicus OX=10116 GN=Hivep2 PE=1 SV=1;sp|Q00900|ZEP2_RAT Human immunodeficiency virus type I enhancer-binding protein 2 homolog OS=Rattus norvegicus OX=	2	4	4	4	4	0	4	0	4	0	1.2	1.2	1.2	267.4	2437	2437;2437	0	22.604	1.2	0	23036000	23036000	0	23036000	0	3	0	3				213	316;1119;1120;2233	True;True;True;True	324;1137;1138;2270	683;2377;2378;4802	747;2543;2544;5235	747;2543;2544;5235
P13668;A0A096MK73	P13668;A0A096MK73	3;2	3;2	3;2	Stathmin	Stmn1	sp|P13668|STMN1_RAT Stathmin OS=Rattus norvegicus OX=10116 GN=Stmn1 PE=1 SV=2;tr|A0A096MK73|A0A096MK73_RAT Stathmin (Fragment) OS=Rattus norvegicus OX=10116 GN=Stmn1 PE=1 SV=1	2	3	3	3	2	3	2	3	2	3	18.1	18.1	18.1	17.288	149	149;126	0	23.788	8.7	18.1	22726000	10678000	12048000	11528000	8229100	2	3	5				242	217;218;1526	True;True;True	225;226;1552	482;483;484;485;3245	528;529;530;531;3512	529;531;3512
F1LWX5;D4AD31;A0A0G2KAI2	F1LWX5;D4AD31;A0A0G2KAI2	1;1;1	1;1;1	1;1;1		Phf2;Phf8	tr|F1LWX5|F1LWX5_RAT PHD finger protein 2 OS=Rattus norvegicus OX=10116 GN=Phf2 PE=1 SV=2;tr|D4AD31|D4AD31_RAT PHD finger protein 8 OS=Rattus norvegicus OX=10116 GN=Phf8 PE=1 SV=2;tr|A0A0G2KAI2|A0A0G2KAI2_RAT PHD finger protein 2 OS=Rattus norvegicus OX=10	3	1	1	1	1	1	1	1	1	1	1.4	1.4	1.4	107.7	979	979;1023;1073	0.0034722	8.2625	1.4	1.4	22535000	9436500	13099000	9436500	9871200	1	1	2				65	2377	TRUE	2416	5141;5142	5613;5614	5614
M0R3M8	M0R3M8	1	1	1		Rrp12	tr|M0R3M8|M0R3M8_RAT Ribosomal RNA-processing 12 homolog OS=Rattus norvegicus OX=10116 GN=Rrp12 PE=1 SV=1	1	1	1	1	1	1	1	1	1	1	1	1	1	143.13	1293	1293	0.0031056	6.5005	1	1	22467000	11241000	11225000	11241000	8459500	1	1	2				222	780	TRUE	796	1650;1651	1784;1785	1784
G3V6I9;P12749;D4A1Z2;M0R6L3	G3V6I9;P12749;D4A1Z2;M0R6L3	2;2;1;1	2;2;1;1	2;2;1;1	60S ribosomal protein L26	Rpl26;Rpl26-ps2;LOC100910721	tr|G3V6I9|G3V6I9_RAT 60S ribosomal protein L26 OS=Rattus norvegicus OX=10116 GN=Rpl26 PE=1 SV=1;sp|P12749|RL26_RAT 60S ribosomal protein L26 OS=Rattus norvegicus OX=10116 GN=Rpl26 PE=1 SV=1;tr|D4A1Z2|D4A1Z2_RAT Ribosomal protein L26, pseudogene 2 OS=Rattus	4	2	2	2	2	2	2	2	2	2	15.9	15.9	15.9	17.258	145	145;145;145;150	0	12.298	15.9	15.9	22061000	7258500	14802000	7262800	11151000	2	2	4				209	838;2040	True;True	855;2073	1791;1792;4390;4391	1930;1931;4762;4763	1931;4762
A0A0U1RRV7;Q0ZFS8	A0A0U1RRV7;Q0ZFS8	2;2	2;2	2;2		Srsf3	tr|A0A0U1RRV7|A0A0U1RRV7_RAT RCG61099, isoform CRA_b OS=Rattus norvegicus OX=10116 GN=Srsf3 PE=1 SV=1;tr|Q0ZFS8|Q0ZFS8_RAT RCG61099, isoform CRA_c OS=Rattus norvegicus OX=10116 GN=Srsf3 PE=1 SV=1	2	2	2	2	0	2	0	2	0	2	16.1	16.1	16.1	14.203	124	124;164	0	13.639	0	16.1	21761000	0	21761000	0	16399000	0	2	2				81	65;2482	True;True	67;2522	144;5422	160;5923	160;5923
Q5XI68	Q5XI68	2	2	2	Protein Dr1	Dr1	sp|Q5XI68|NC2B_RAT Protein Dr1 OS=Rattus norvegicus OX=10116 GN=Dr1 PE=2 SV=1	1	2	2	2	2	1	2	1	2	1	12.5	12.5	12.5	19.429	176	176	0	14.875	12.5	8	21288000	14250000	7037900	11207000	8346800	2	1	3				312	220;1676	True;True	228;1703	488;489;3556	534;535;3836	534;3836
D3ZHS3;D4A3P4	D3ZHS3;D4A3P4	2;1	2;1	2;1		Nol4l;Nol4	tr|D3ZHS3|D3ZHS3_RAT Nucleolar protein 4-like OS=Rattus norvegicus OX=10116 GN=Nol4l PE=4 SV=2;tr|D4A3P4|D4A3P4_RAT Nucleolar protein 4 OS=Rattus norvegicus OX=10116 GN=Nol4 PE=1 SV=1	2	2	2	2	2	2	2	2	2	2	6.5	6.5	6.5	48.592	447	447;574	0	21.768	6.5	6.5	21059000	8863400	12195000	8755400	9298300	2	2	4				131	1815;2270	True;True	1843;2308	3876;3877;4884;4885	4205;4206;5318;5319	4206;5319
G3V8C3;P31000	G3V8C3;P31000	3;3	2;2	2;2	Vimentin	Vim	tr|G3V8C3|G3V8C3_RAT Vimentin OS=Rattus norvegicus OX=10116 GN=Vim PE=1 SV=1;sp|P31000|VIME_RAT Vimentin OS=Rattus norvegicus OX=10116 GN=Vim PE=1 SV=2	2	3	2	2	3	3	2	2	2	2	7.7	6.2	6.2	53.7	466	466;466	0	12.099	7.7	7.7	20924000	8909200	12015000	8772300	9191400	2	2	4				214	572;1391;2031	False;True;True	585;1411;2064	1218;1219;2969;2970;4370;4371	1324;1325;3219;3220;4741;4742	1325;3220;4742
B0BNH4	B0BNH4	2	2	2		Zfp637	tr|B0BNH4|B0BNH4_RAT RCG30169, isoform CRA_b OS=Rattus norvegicus OX=10116 GN=Zfp637 PE=2 SV=1	1	2	2	2	2	1	2	1	2	1	7.4	7.4	7.4	30.762	272	272	0	11.803	7.4	3.7	20445000	12668000	7777400	10814000	7715000	2	1	3				90	156;1557	True;True	161;1583	346;347;3317	380;381;3588	380;3588
D4A538	D4A538	3	3	3		Znf740	tr|D4A538|D4A538_RAT Zinc finger protein 740 OS=Rattus norvegicus OX=10116 GN=Znf740 PE=1 SV=2	1	3	3	3	0	3	0	3	0	3	22	22	22	23.276	205	205	0	23.198	0	22	20270000	0	20270000	0	15276000	0	3	3				164	185;1438;2417	True;True;True	191;1458;2456	418;3059;5274	463;3310;5768	463;3310;5768
A0A0H2UHJ5;Q562A2	A0A0H2UHJ5;Q562A2	2;2	2;2	2;2	Zinc finger RNA-binding protein	Zfr	tr|A0A0H2UHJ5|A0A0H2UHJ5_RAT Zinc finger RNA-binding protein OS=Rattus norvegicus OX=10116 GN=Zfr PE=1 SV=1;sp|Q562A2|ZFR_RAT Zinc finger RNA-binding protein OS=Rattus norvegicus OX=10116 GN=Zfr PE=1 SV=2	2	2	2	2	2	1	2	1	2	1	1.1	1.1	1.1	116.91	1074	1074;1073	0	12.929	1.1	1	20071000	11691000	8379600	11691000	6314900	2	1	3				71	2486;2487	True;True	2526;2527	5433;5434;5435	5934;5935;5936	5934;5936
A0A0G2K8H0;Q5M9G3	A0A0G2K8H0;Q5M9G3	2;2	2;2	2;2	Caprin-1	Caprin1	tr|A0A0G2K8H0|A0A0G2K8H0_RAT Caprin-1 OS=Rattus norvegicus OX=10116 GN=Caprin1 PE=1 SV=1;sp|Q5M9G3|CAPR1_RAT Caprin-1 OS=Rattus norvegicus OX=10116 GN=Caprin1 PE=1 SV=2	2	2	2	2	2	1	2	1	2	1	3.9	3.9	3.9	79.632	720	720;707	0	13.918	3.9	2.8	19992000	12092000	7900000	10012000	8033800	3	2	5				61	318;2102	True;True	326;2137	685;4527;4528;4529;4530	749;4911;4912;4913;4914	749;4912
D3ZW57;D4AD70;P63174	D3ZW57;D4AD70;P63174	1;1;1	1;1;1	1;1;1	60S ribosomal protein L38	LOC686066;RGD1561636;Rpl38	tr|D3ZW57|D3ZW57_RAT Similar to 60S ribosomal protein L38 OS=Rattus norvegicus OX=10116 GN=LOC686066 PE=3 SV=2;tr|D4AD70|D4AD70_RAT Similar to 60S ribosomal protein L38 OS=Rattus norvegicus OX=10116 GN=RGD1561636 PE=3 SV=1;sp|P63174|RL38_RAT 60S ribosomal	3	1	1	1	1	1	1	1	1	1	18.8	18.8	18.8	7.9604	69	69;70;70	0.0031546	6.645	18.8	18.8	18570000	5418700	13152000	5418700	9911100	1	1	2				148	1097	TRUE	1115	2328;2329	2493;2494	2494
Q4QR81;A0A0G2JYJ7	Q4QR81;A0A0G2JYJ7	4;4	4;4	4;4		Rbms2	tr|Q4QR81|Q4QR81_RAT RNA binding motif, single stranded interacting protein 2, isoform CRA_a OS=Rattus norvegicus OX=10116 GN=Rbms2 PE=1 SV=1;tr|A0A0G2JYJ7|A0A0G2JYJ7_RAT RNA-binding motif, single stranded-interacting protein 2 OS=Rattus norvegicus OX=1011	2	4	4	4	3	4	3	4	3	4	12.4	12.4	12.4	40.605	379	379;405	0	26.788	9.8	12.4	18184000	3849200	14335000	6739500	7912600	3	3	6				26	114;820;966;1369	True;True;True;True	117;836;984;1388	254;255;1743;1744;2054;2911;2912	281;282;1880;1881;2200;3158;3159	282;1881;2200;3158
D3ZGR7	D3ZGR7	2	2	2		LOC100910447	tr|D3ZGR7|D3ZGR7_RAT RCG51149 OS=Rattus norvegicus OX=10116 GN=Trir PE=1 SV=1	1	2	2	2	2	1	2	1	2	1	17.3	17.3	17.3	18.472	173	173	0	11.15	17.3	9.8	17844000	10476000	7368400	8511700	7516700	1	1	2				129	1079;1707	True;True	1097;1734	2297;3617;3618	2462;3899;3900	2462;3900
A0A0G2JVK8;D3ZFT1	A0A0G2JVK8;D3ZFT1	2;2	2;2	2;2		Rfc1	tr|A0A0G2JVK8|A0A0G2JVK8_RAT Replication factor C subunit 1 OS=Rattus norvegicus OX=10116 GN=Rfc1 PE=1 SV=1;tr|D3ZFT1|D3ZFT1_RAT Replication factor C subunit 1 OS=Rattus norvegicus OX=10116 GN=Rfc1 PE=1 SV=2	2	2	2	2	1	2	1	2	1	2	4.6	4.6	4.6	72.983	656	656;1131	0	14.914	2	4.6	17772000	5038900	12733000	6643600	7991200	1	2	3				18	186;2462	True;True	192;2502	419;5384;5385	464;5880;5881	464;5881
E9PT29;A0A096MIX2	E9PT29;A0A096MIX2	2;2	2;2	2;2		Ddx17	tr|E9PT29|E9PT29_RAT DEAD-box helicase 17 OS=Rattus norvegicus OX=10116 GN=Ddx17 PE=1 SV=3;tr|A0A096MIX2|A0A096MIX2_RAT DEAD (Asp-Glu-Ala-Asp) box polypeptide 17, isoform CRA_a OS=Rattus norvegicus OX=10116 GN=Ddx17 PE=1 SV=1	2	2	2	2	1	2	1	2	1	2	3.8	3.8	3.8	72.459	650	650;652	0	24.735	2.2	3.8	17579000	5556300	12023000	7501500	7115100	1	2	3				0	1356;2126	True;True	1375;2161	2887;4588;4589	3132;4989;4990	3132;4989
D3ZE17;Q8VHK2	D3ZE17;Q8VHK2	2;2	2;2	2;2	Caskin-1	Caskin1	tr|D3ZE17|D3ZE17_RAT Caskin-1 OS=Rattus norvegicus OX=10116 GN=Caskin1 PE=1 SV=2;sp|Q8VHK2|CSKI1_RAT Caskin-1 OS=Rattus norvegicus OX=10116 GN=Caskin1 PE=1 SV=1	2	2	2	2	1	2	1	2	1	2	2	2	2	150.26	1430	1430;1430	0	16.409	1.3	2	17191000	4799500	12391000	6729100	7408300	1	2	3				126	1730;2074	True;True	1757;2107	3681;3682;4454	3984;3985;4831	3985;4831
Q4V8E1	Q4V8E1	3	3	3		Gatad2b	tr|Q4V8E1|Q4V8E1_RAT GATA zinc finger domain-containing 2B OS=Rattus norvegicus OX=10116 GN=Gatad2b PE=1 SV=1	1	3	3	3	2	2	2	2	2	2	5.9	5.9	5.9	65.26	593	593	0	16.44	4	3.4	17186000	9063500	8122100	8756600	6427700	2	1	3				302	1277;2003;2266	True;True;True	1296;2036;2304	2713;4318;4876;4877	2920;4689;5310;5311	2920;4689;5311
D3ZU57	D3ZU57	2	2	2	Bifunctional lysine-specific demethylase and histidyl-hydroxylase NO66	No66	sp|D3ZU57|RIOX1_RAT Ribosomal oxygenase 1 OS=Rattus norvegicus OX=10116 GN=Riox1 PE=1 SV=1	1	2	2	2	1	2	1	2	1	2	4.4	4.4	4.4	67.454	597	597	0	14.694	2.5	4.4	17126000	9250900	7875100	9250900	5934700	1	2	3				145	489;1379	True;True	501;1399	1047;2949;2950	1150;3196;3197	1150;3196
A0A0G2K4X8;Q6PEC4	A0A0G2K4X8;Q6PEC4	2;2	2;2	2;2	S-phase kinase-associated protein 1	Skp1	tr|A0A0G2K4X8|A0A0G2K4X8_RAT S-phase kinase-associated protein 1 OS=Rattus norvegicus OX=10116 GN=Skp1 PE=1 SV=1;sp|Q6PEC4|SKP1_RAT S-phase kinase-associated protein 1 OS=Rattus norvegicus OX=10116 GN=Skp1 PE=1 SV=3	2	2	2	2	1	2	1	2	1	2	10.3	10.3	10.3	18.931	165	165;163	0	11.256	5.5	10.3	16908000	5899100	11009000	7295800	6899900	1	2	3				47	474;724	True;True	486;739	1015;1535;1536	1113;1662;1663	1113;1662
A0A0G2K2W6;D3ZKH4	A0A0G2K2W6;D3ZKH4	2;2	2;2	2;2	Histone-lysine N-methyltransferase	Ash1l	tr|A0A0G2K2W6|A0A0G2K2W6_RAT ASH1-like histone lysine methyltransferase OS=Rattus norvegicus OX=10116 GN=Ash1l PE=4 SV=1;tr|D3ZKH4|D3ZKH4_RAT ASH1-like histone lysine methyltransferase OS=Rattus norvegicus OX=10116 GN=Ash1l PE=4 SV=3	2	2	2	2	1	2	1	2	1	2	0.7	0.7	0.7	326.47	2918	2918;2958	0	14.274	0.3	0.7	16884000	4587800	12296000	5620200	8233800	1	2	3				40	470;1255	True;True	482;1274	1008;2677;2678	1106;2884;2885	1106;2885
Q9QY02-2;Q9QY02	Q9QY02-2;Q9QY02	2;2	2;2	2;2	YTH domain-containing protein 1	Ythdc1	sp|Q9QY02-2|YTDC1_RAT Isoform 2 of YTH domain-containing protein 1 OS=Rattus norvegicus OX=10116 GN=Ythdc1;sp|Q9QY02|YTDC1_RAT YTH domain-containing protein 1 OS=Rattus norvegicus OX=10116 GN=Ythdc1 PE=1 SV=2	2	2	2	2	1	2	1	2	1	2	2.4	2.4	2.4	83.005	712	712;738	0.0036765	11.09	1.3	2.4	16577000	5580600	10996000	6113000	7754400	1	0	1				348	1387;2296	True;True	1407;2334	2961;4939;4940	3208;5382;5383	3208;5382
Q4V8G3;A0A0G2JTZ2	Q4V8G3;A0A0G2JTZ2	7;7	5;5	5;5		Sox6	tr|Q4V8G3|Q4V8G3_RAT SRY (Sex determining region Y)-box 6 OS=Rattus norvegicus OX=10116 GN=Sox6 PE=2 SV=1;tr|A0A0G2JTZ2|A0A0G2JTZ2_RAT SRY box 6 OS=Rattus norvegicus OX=10116 GN=Sox6 PE=4 SV=1	2	7	5	5	7	2	5	1	5	1	9.3	8.3	8.3	87.318	787	787;854	0	35.268	9.3	2	16241000	12825000	3416100	11887000	3512200	5	1	6				11	440;922;1310;1672;1677;2041;2322	True;True;True;False;False;True;True	452;939;1329;1699;1704;2074;2361	960;1956;2776;3550;3551;3557;4392;4393;5005	1057;2099;2984;3830;3831;3837;4764;4765;5456	1057;2099;2984;3830;3837;4764;5456
B2RZ39	B2RZ39	1	1	1	39S ribosomal protein L36, mitochondrial	Mrpl36	sp|B2RZ39|RM36_RAT 39S ribosomal protein L36, mitochondrial OS=Rattus norvegicus OX=10116 GN=Mrpl36 PE=3 SV=1	1	1	1	1	1	1	1	1	1	1	8.2	8.2	8.2	10.801	97	97	0.0034483	8.1214	8.2	8.2	15807000	8090200	7716600	8090200	5815300	1	1	2				98	782	TRUE	798	1653;1654	1787;1788	1788
A0A0G2JYZ8;Q5U2Y2	A0A0G2JYZ8;Q5U2Y2	6;6	3;3	3;3	DNA-binding protein SATB	Satb1	tr|A0A0G2JYZ8|A0A0G2JYZ8_RAT SATB homeobox 1 OS=Rattus norvegicus OX=10116 GN=Satb1 PE=1 SV=1;tr|Q5U2Y2|Q5U2Y2_RAT DNA-binding protein SATB OS=Rattus norvegicus OX=10116 GN=Satb1 PE=1 SV=1	2	6	3	3	6	0	3	0	3	0	11.2	8.7	8.7	79.45	713	713;764	0	28.358	11.2	0	15165000	15165000	0	15165000	0	3	0	3				28	132;1024;1380;2013;2185;2493	False;False;True;True;True;False	136;1042;1400;2046;2221;2533	291;2161;2951;4337;4702;5450	318;2318;3198;4708;5129;5951	318;2318;3198;4708;5129;5951
B1WC16	B1WC16	1	1	1		Bclaf1	tr|B1WC16|B1WC16_RAT BCL2-associated transcription factor 1 OS=Rattus norvegicus OX=10116 GN=Bclaf1 PE=1 SV=1	1	1	1	1	1	1	1	1	1	1	1.5	1.5	1.5	106.06	921	921	0.0031348	6.5908	1.5	1.5	14997000	8064200	6932300	8064200	5224200	1	1	2				92	1772	TRUE	1799	3768;3769	4077;4078	4077
A0A0H2UHQ1;F1LZX7;Q7TPJ7;P24049;D3Z9G9;A0A0G2KB77	A0A0H2UHQ1;F1LZX7;Q7TPJ7;P24049;D3Z9G9;A0A0G2KB77	3;3;3;3;2;2	3;3;3;3;2;2	3;3;3;3;2;2	60S ribosomal protein L17	RGD1359290;Rpl17;RGD1560017	tr|A0A0H2UHQ1|A0A0H2UHQ1_RAT 60S ribosomal protein L17 OS=Rattus norvegicus OX=10116 GN=Rpl17 PE=1 SV=1;tr|F1LZX7|F1LZX7_RAT 60S ribosomal protein L17 OS=Rattus norvegicus OX=10116 GN=Rpl17 PE=1 SV=2;tr|Q7TPJ7|Q7TPJ7_RAT Ac2-210 OS=Rattus norvegicus OX=101	6	3	3	3	2	2	2	2	2	2	11.1	11.1	11.1	21.967	189	189;204;220;184;177;201	0	18.716	11.1	4.8	14723000	9985100	4737400	6459400	7095800	2	2	4				74	503;2592;2593	True;True;True	515;2636;2637	1076;5674;5675;5676	1179;6184;6185;6186	1179;6184;6186
Q62764-2;D4A0L4	Q62764-2;D4A0L4	23;20	2;2	2;2	Y-box-binding protein 3	Ybx3	sp|Q62764-2|YBOX3_RAT Isoform 2 of Y-box-binding protein 3 OS=Rattus norvegicus OX=10116 GN=Ybx3;tr|D4A0L4|D4A0L4_RAT Y-box-binding protein 3 OS=Rattus norvegicus OX=10116 GN=Ybx3 PE=1 SV=3	2	23	2	2	22	18	2	1	2	1	71.2	7.5	7.5	30.803	292	292;291	0	19.757	71.2	58.2	14401000	8245500	6155300	7028500	5855700	2	1	3				317	79;413;414;617;1481;1482;1488;1489;1508;1509;1510;1548;1552;1862;2050;2051;2052;2160;2161;2432;2433;2446;2596	False;False;False;False;True;True;False;False;False;False;False;False;False;False;False;False;False;False;False;False;False;False;False	81;424;425;630;1506;1507;1513;1514;1534;1535;1536;1574;1578;1890;2083;2084;2085;2196;2197;2472;2473;2486;2640	177;178;179;893;894;895;896;897;898;1304;1305;1306;1307;3142;3143;3144;3156;3157;3158;3159;3160;3161;3162;3163;3164;3165;3166;3167;3201;3202;3203;3204;3205;3206;3207;3208;3209;3210;3211;3301;3302;3309;3988;4408;4409;4410;4411;4648;4649;4650;4651;4652;4653;5310;5311;5312;5313;5314;5350;5351;5352;5353;5683;5684	194;195;196;197;198;978;979;980;981;982;983;1413;1414;1415;1416;1417;3408;3409;3410;3423;3424;3425;3426;3427;3428;3429;3430;3431;3432;3433;3434;3468;3469;3470;3471;3472;3473;3474;3475;3476;3477;3478;3572;3573;3580;4333;4780;4781;4782;4783;4784;5051;5052;5053;5054;5055;5056;5057;5058;5804;5805;5806;5807;5808;5846;5847;5848;5849;6193;6194	195;978;981;1416;3408;3410;3425;3432;3469;3473;3478;3572;3580;4333;4781;4782;4784;5051;5056;5804;5808;5849;6193
Q66HB8	Q66HB8	4	4	4		Mbd1	tr|Q66HB8|Q66HB8_RAT Methyl-CpG-binding domain protein 1 OS=Rattus norvegicus OX=10116 GN=Mbd1 PE=2 SV=1	1	4	4	4	0	4	0	4	0	4	8.8	8.8	8.8	58.156	533	533	0	25.877	0	8.8	13994000	0	13994000	0	10546000	0	4	4				324	50;1291;1852;2225	True;True;True;True	52;1310;1880;2262	115;2740;3966;4783	131;2947;4311;5216	131;2947;4311;5216
Q5FVM4	Q5FVM4	4	3	3	Non-POU domain-containing octamer-binding protein	Nono	sp|Q5FVM4|NONO_RAT Non-POU domain-containing octamer-binding protein OS=Rattus norvegicus OX=10116 GN=Nono PE=1 SV=3	1	4	3	3	0	4	0	3	0	3	10.3	8.2	8.2	54.925	476	476	0	22.603	0	10.3	13857000	0	13857000	0	10443000	0	3	3				307	251;710;1404;1761	False;True;True;True	259;725;1424;1788	543;544;1503;2998;3746	594;595;1630;3249;4055	595;1630;3249;4055
F1M278	F1M278	4	3	3		Zfp605	tr|F1M278|F1M278_RAT Zinc finger protein 605 OS=Rattus norvegicus OX=10116 GN=Zfp605 PE=4 SV=3	1	4	3	3	0	4	0	3	0	3	8.6	4.6	4.6	80.454	690	690	0	16.57	0	8.6	13682000	0	13682000	0	10311000	0	3	3				194	320;943;1162;2236	True;True;True;False	328;960;1180;2273	687;2006;2502;4813	751;2149;2706;5246	751;2149;2706;5246
P21272-3;P21272-2;P21272	P21272-3;P21272-2;P21272	3;3;3	3;3;3	3;3;3	CCAAT/enhancer-binding protein beta	Cebpb	sp|P21272-3|CEBPB_RAT Isoform 3 of CCAAT/enhancer-binding protein beta OS=Rattus norvegicus OX=10116 GN=Cebpb;sp|P21272-2|CEBPB_RAT Isoform 2 of CCAAT/enhancer-binding protein beta OS=Rattus norvegicus OX=10116 GN=Cebpb;sp|P21272|CEBPB_RAT CCAAT/enhancer-b	3	3	3	3	0	3	0	3	0	3	22.8	22.8	22.8	15.567	145	145;276;297	0	20.963	0	22.8	13634000	0	13634000	0	10275000	0	3	3				250	27;237;1182	True;True;True	27;245;1200	66;518;2539	82;569;2743	82;569;2743
A1A5P2	A1A5P2	1	1	1	Ribosome biogenesis regulatory protein homolog	Rrs1	sp|A1A5P2|RRS1_RAT Ribosome biogenesis regulatory protein homolog OS=Rattus norvegicus OX=10116 GN=Rrs1 PE=2 SV=1	1	1	1	1	1	1	1	1	1	1	3.6	3.6	3.6	41.536	365	365	0.0031646	6.6507	3.6	3.6	13320000	5851500	7468800	5851500	5628500	1	1	2				86	2461	TRUE	2501	5382;5383	5878;5879	5879
Q00939	Q00939	1	1	1	Forkhead box protein G1	Foxg1	sp|Q00939|FOXG1_RAT Forkhead box protein G1 OS=Rattus norvegicus OX=10116 GN=Foxg1 PE=2 SV=1	1	1	1	1	1	1	1	1	1	1	5.4	5.4	5.4	51.466	480	480	0.0030675	6.4192	5.4	5.4	13214000	7845200	5368800	7845200	4045900	1	1	2				286	621	TRUE	634	1316;1317	1428;1429	1428
Q62785	Q62785	2	2	2	28 kDa heat- and acid-stable phosphoprotein	Pdap1	sp|Q62785|HAP28_RAT 28 kDa heat- and acid-stable phosphoprotein OS=Rattus norvegicus OX=10116 GN=Pdap1 PE=1 SV=1	1	2	2	2	1	1	1	1	1	1	5	5	5	20.605	181	181	0	12.113	4.4	5	13119000	8185200	4933700	0	3718000	1	1	2				318	1454;1764	True;True	1477;1791	3093;3750	3350;4059	3350;4059
F1M6L8;D3ZZW2	F1M6L8;D3ZZW2	1;1	1;1	1;1		LOC684976;LOC100910678	tr|F1M6L8|F1M6L8_RAT Uncharacterized protein OS=Rattus norvegicus OX=10116 PE=4 SV=1;tr|D3ZZW2|D3ZZW2_RAT RCG25234 OS=Rattus norvegicus OX=10116 GN=Tma7 PE=4 SV=1	2	1	1	1	1	1	1	1	1	1	21.9	21.9	21.9	7.0242	64	64;64	0.0033333	7.2349	21.9	21.9	13090000	7318400	5771300	7318400	4349300	2	1	3				155	14	TRUE	14	33;34	48;49;50	49
F7F5J1	F7F5J1	2	2	1			tr|F7F5J1|F7F5J1_RAT Transcription factor EB OS=Rattus norvegicus OX=10116 GN=Tfeb PE=1 SV=1	1	2	2	1	0	2	0	2	0	1	3.6	3.6	1.9	52.748	476	476	0	11.884	0	3.6	13035000	0	13035000	0	9823000	0	2	2				206	987;2537	True;True	1005;2580	2099;5538	2252;6044	2252;6044
F1LQM8	F1LQM8	2	2	2		Msh3	tr|F1LQM8|F1LQM8_RAT MutS homolog 3 OS=Rattus norvegicus OX=10116 GN=Msh3 PE=4 SV=2	1	2	2	2	0	2	0	2	0	2	2.5	2.5	2.5	124.62	1104	1104	0	12.798	0	2.5	13028000	0	13028000	0	9817800	0	2	2				184	2138;2323	True;True	2173;2362	4611;5006	5012;5457	5012;5457
P17325	P17325	2	1	1	Transcription factor AP-1	Jun	sp|P17325|JUN_RAT Transcription factor AP-1 OS=Rattus norvegicus OX=10116 GN=Jun PE=1 SV=1	1	2	1	1	2	2	1	1	1	1	6.6	4.5	4.5	36	334	334	0	13.819	6.6	6.6	12922000	4856900	8064700	4856900	6077500	1	1	2				246	483;1587	False;True	495;1614	1033;1034;3380;3381	1133;1134;3655;3656	1133;3656
Q3KRE8;P69897;P85108;Q4QRB4	Q3KRE8;P69897;P85108;Q4QRB4	2;1;1;1	2;1;1;1	2;1;1;1	Tubulin beta-2B chain;Tubulin beta-5 chain;Tubulin beta-2A chain;Tubulin beta-3 chain	Tubb2b;Tubb5;Tubb2a;Tubb3	sp|Q3KRE8|TBB2B_RAT Tubulin beta-2B chain OS=Rattus norvegicus OX=10116 GN=Tubb2b PE=1 SV=1;sp|P69897|TBB5_RAT Tubulin beta-5 chain OS=Rattus norvegicus OX=10116 GN=Tubb5 PE=1 SV=1;sp|P85108|TBB2A_RAT Tubulin beta-2A chain OS=Rattus norvegicus OX=10116 GN=	4	2	2	2	2	1	2	1	2	1	7	7	7	49.953	445	445;444;445;450	0	14.029	7	3.4	12692000	6725300	5967000	4666100	6555900	2	1	3				292	115;983	True;True	118;1001	256;257;2093	283;284;2239	284;2239
Q4FZS5	Q4FZS5	2	2	2		MGC95210	tr|Q4FZS5|Q4FZS5_RAT Hypothetical LOC287798 OS=Rattus norvegicus OX=10116 GN=MGC95210 PE=1 SV=1	1	2	2	2	1	1	1	1	1	1	5.8	5.8	5.8	58.083	531	531	0	12.05	3	2.8	12597000	8915500	3681600	8915500	0	1	1	2				296	1467;1469	True;True	1491;1493	3111;3113	3368;3370	3368;3370
Q6IRI7;D3ZC87	Q6IRI7	5;2	2;0	2;0		Mafk	tr|Q6IRI7|Q6IRI7_RAT MAF bZIP transcription factor K OS=Rattus norvegicus OX=10116 GN=Mafk PE=1 SV=1	2	5	2	2	1	5	0	2	0	2	26.3	14.1	14.1	17.567	156	156;156	0	11.544	5.8	26.3	12316000	0	12316000	0	9281000	0	2	2				329	459;1561;1997;2260;2331	False;False;True;False;True	471;1587;2030;2297;2370	991;3327;3328;3329;4306;4862;5025	1089;3598;3599;3600;4677;5296;5478	1089;3599;4677;5296;5478
A0A0G2K1L7;D3ZA12	A0A0G2K1L7;D3ZA12	2;2	2;2	2;2	Chromodomain-helicase-DNA-binding protein 6	Chd6	tr|A0A0G2K1L7|A0A0G2K1L7_RAT Chromodomain-helicase-DNA-binding protein 6 OS=Rattus norvegicus OX=10116 GN=Chd6 PE=1 SV=1;sp|D3ZA12|CHD6_RAT Chromodomain-helicase-DNA-binding protein 6 OS=Rattus norvegicus OX=10116 GN=Chd6 PE=1 SV=2	2	2	2	2	2	1	2	1	2	1	0.4	0.4	0.4	304.76	2711	2711;2698	0	11.254	0.4	0.3	12236000	5542300	6693400	5542300	5044100	2	1	3				37	349;350	True;True	358;359	756;757;758	823;824;825	823;825
Q66HP1;F1LSL7;G3V6F3;Q923V7;Q9ET58	Q66HP1;F1LSL7;G3V6F3;Q923V7;Q9ET58	3;3;2;2;2	1;1;1;1;1	0;0;0;0;0	Krueppel-like factor 2	Klf5;Klf1;Klf4;Klf2	tr|Q66HP1|Q66HP1_RAT Klf5 protein OS=Rattus norvegicus OX=10116 GN=Klf5 PE=2 SV=1;tr|F1LSL7|F1LSL7_RAT Kruppel-like factor 5 OS=Rattus norvegicus OX=10116 GN=Klf5 PE=4 SV=2;tr|G3V6F3|G3V6F3_RAT Kruppel-like factor 1 OS=Rattus norvegicus OX=10116 GN=Klf1 PE	5	3	1	0	1	3	1	1	0	0	7.4	2.5	0	40.982	363	363;443;376;482;351	0.0030581	6.4188	2.5	7.4	12151000	1889100	10262000	1889100	7733400	1	1	2				187	528;2112;2236	False;True;False	540;2147;2273	1126;1127;4555;4556;4813	1232;1233;4944;4945;5246	1233;4945;5246
E9PT76;D3ZQW7;A0A0G2KB28;A0A0U1RVI9;D3ZIY7;D3ZT78;P27952;M0RAJ8	E9PT76;D3ZQW7;A0A0G2KB28;A0A0U1RVI9;D3ZIY7;D3ZT78;P27952;M0RAJ8	2;2;2;2;2;2;2;1	2;2;2;2;2;2;2;1	2;2;2;2;2;2;2;1	40S ribosomal protein S2	LOC100359960;Gm8225;Rps2	tr|E9PT76|E9PT76_RAT Uncharacterized protein OS=Rattus norvegicus OX=10116 PE=3 SV=3;tr|D3ZQW7|D3ZQW7_RAT Uncharacterized protein OS=Rattus norvegicus OX=10116 PE=3 SV=2;tr|A0A0G2KB28|A0A0G2KB28_RAT Uncharacterized protein OS=Rattus norvegicus OX=10116 PE=	8	2	2	2	0	2	0	2	0	2	12.2	12.2	12.2	24.244	221	221;222;231;267;269;270;293;288	0	13.348	0	12.2	12096000	0	12096000	0	9115500	0	2	2				68	805;1123	True;True	821;1141	1704;2381	1838;2547	1838;2547
P18437;F1M923;M0R3K7	P18437	5;1;1	1;0;0	1;0;0	Non-histone chromosomal protein HMG-17	Hmgn2	sp|P18437|HMGN2_RAT Non-histone chromosomal protein HMG-17 OS=Rattus norvegicus OX=10116 GN=Hmgn2 PE=1 SV=2	3	5	1	1	3	5	1	1	1	1	54.4	28.9	28.9	9.3654	90	90;83;98	0.003125	6.5848	52.2	54.4	11832000	5215400	6616300	5215400	4986100	1	1	2				247	309;1324;1591;1592;2420	True;False;False;False;False	317;1343;1618;1619;2459	669;670;2807;2808;2809;3387;3388;5280;5281	733;734;3019;3020;3021;3662;3663;5774;5775	733;3021;3662;3663;5774
A0A0G2JTL8;Q2I0Y6;Q9QYU7	A0A0G2JTL8;Q2I0Y6;Q9QYU7	1;1;1	1;1;1	1;1;1	Ribosome biogenesis protein NSA2 homolog	Nsa2	tr|A0A0G2JTL8|A0A0G2JTL8_RAT Ribosome biogenesis protein NSA2 homolog OS=Rattus norvegicus OX=10116 GN=Nsa2 PE=1 SV=1;tr|Q2I0Y6|Q2I0Y6_RAT RCG44568 OS=Rattus norvegicus OX=10116 GN=Nsa2 PE=1 SV=1;sp|Q9QYU7|NSA2_RAT Ribosome biogenesis protein NSA2 homolog	3	1	1	1	1	1	1	1	1	1	4.7	4.7	4.7	25.609	214	214;260;260	0.0032573	6.8787	4.7	4.7	11478000	5063300	6415000	5063300	4834300	2	1	3				10	1596	TRUE	1623	3394;3395;3396	3671;3672;3673	3672
Q5EAN7	Q5EAN7	1	1	1	Telomeric repeat-binding factor 2-interacting protein 1	Terf2ip	sp|Q5EAN7|TE2IP_RAT Telomeric repeat-binding factor 2-interacting protein 1 OS=Rattus norvegicus OX=10116 GN=Terf2ip PE=1 SV=1	1	1	1	1	1	1	1	1	1	1	2	2	2	43.418	393	393	0.0033223	7.2068	2	2	11009000	5021100	5988300	5021100	4512800	1	1	2				306	2562	TRUE	2605	5594;5595	6103;6104	6104
F1M987	F1M987	2	2	2		Scube1	tr|F1M987|F1M987_RAT Signal peptide, CUB domain and EGF-like domain-containing 1 OS=Rattus norvegicus OX=10116 GN=Scube1 PE=4 SV=1	1	2	2	2	1	2	1	2	1	2	1.9	1.9	1.9	111.48	1018	1018	0	12.082	0.8	1.9	10921000	2827500	8093200	4240300	4686200	1	2	3				201	206;2542	True;True	213;2585	461;5548;5549	506;6054;6055	506;6054
A0A0H2UHT6;D3ZAU6;P62271	A0A0H2UHT6;D3ZAU6;P62271	1;1;1	1;1;1	1;1;1	40S ribosomal protein S18	RGD1561919;Rps18	tr|A0A0H2UHT6|A0A0H2UHT6_RAT Ribosomal protein S18 OS=Rattus norvegicus OX=10116 GN=Rps18 PE=1 SV=1;tr|D3ZAU6|D3ZAU6_RAT Similar to ribosomal protein S18 OS=Rattus norvegicus OX=10116 GN=RGD1561919 PE=3 SV=1;sp|P62271|RS18_RAT 40S ribosomal protein S18 OS=	3	1	1	1	0	1	0	1	0	1	5.3	5.3	5.3	17.587	151	151;152;152	0.0086957	6.0471	0	5.3	10769000	0	10769000	0	8115700	0	1	1				77	781	TRUE	797	1652	1786	1786
F7F855	F7F855	2	2	2		Ralyl	tr|F7F855|F7F855_RAT RALY RNA-binding protein-like OS=Rattus norvegicus OX=10116 GN=Ralyl PE=4 SV=1	1	2	2	2	0	2	0	2	0	2	11.5	11.5	11.5	16.58	148	148	0.0036101	10.814	0	11.5	10559000	0	10559000	0	7957100	0	1	1				207	242;2383	True;True	250;2422	525;5191	576;5676	576;5676
Q6MGC3	Q6MGC3	1	1	1		Wdr46	tr|Q6MGC3|Q6MGC3_RAT BING4 protein OS=Rattus norvegicus OX=10116 GN=Wdr46 PE=1 SV=1	1	1	1	1	1	1	1	1	1	1	3.3	3.3	3.3	67.472	609	609	0.0034247	7.9361	3.3	3.3	10510000	5579000	4931300	5579000	3716300	1	1	2				330	1811	TRUE	1839	3867;3868	4196;4197	4196
A0A0G2JYW3;P08081-2;P08081	A0A0G2JYW3;P08081-2;P08081	2;2;2	2;2;2	2;2;2	Clathrin light chain A	Clta	tr|A0A0G2JYW3|A0A0G2JYW3_RAT Clathrin light chain OS=Rattus norvegicus OX=10116 GN=Clta PE=1 SV=1;sp|P08081-2|CLCA_RAT Isoform Non-brain of Clathrin light chain A OS=Rattus norvegicus OX=10116 GN=Clta;sp|P08081|CLCA_RAT Clathrin light chain A OS=Rattus nor	3	2	2	2	1	1	1	1	1	1	6.8	6.8	6.8	25.58	236	236;218;248	0	11.343	3.8	3	10281000	1966400	8314600	1966400	0	1	1	2				27	1140;1226	True;True	1158;1245	2429;2630	2598;2837	2598;2837
F2Z3S9	F2Z3S9	1	1	1		Nr2f1	tr|F2Z3S9|F2Z3S9_RAT Nuclear receptor subfamily 2, group F, member 1 OS=Rattus norvegicus OX=10116 GN=Nr2f1 PE=3 SV=1	1	1	1	1	1	1	1	1	1	1	7.1	7.1	7.1	45.899	420	420	0.0035336	9.3806	7.1	7.1	10078000	4119100	5958600	4119100	4490400	1	1	2				205	173	TRUE	178	390;391	427;428	427
Q9QZ86	Q9QZ86	2	2	2	Nucleolar protein 58	Nop58	sp|Q9QZ86|NOP58_RAT Nucleolar protein 58 OS=Rattus norvegicus OX=10116 GN=Nop58 PE=1 SV=1	1	2	2	2	1	1	1	1	1	1	5.4	5.4	5.4	60.07	534	534	0	13.801	2.8	2.6	9011800	5138500	3873300	5138500	0	1	0	1				349	1098;2351	True;True	1116;2390	2330;5091	2495;5563	2495;5563
D3ZCK7	D3ZCK7	6	1	1		Emx2	tr|D3ZCK7|D3ZCK7_RAT Empty spiracles homeobox 2 OS=Rattus norvegicus OX=10116 GN=Emx2 PE=4 SV=1	1	6	1	1	5	6	1	1	1	1	16.6	5.1	5.1	28.374	253	253	0.0033445	7.2787	15.8	16.6	8177600	3911000	4266700	3911000	3215400	1	1	2				122	995;1519;1520;1602;2179;2523	False;False;False;True;False;False	1013;1545;1546;1629;2215;2566	2111;3232;3233;3234;3235;3407;3408;4690;4691;5518;5519	2264;3499;3500;3501;3502;3684;3685;5116;5117;6024;6025	2264;3499;3501;3685;5117;6025
A0A0H2UHS7;P12001	A0A0H2UHS7;P12001	1;1	1;1	1;1	60S ribosomal protein L18	Rpl18	tr|A0A0H2UHS7|A0A0H2UHS7_RAT 60S ribosomal protein L18 OS=Rattus norvegicus OX=10116 GN=Rpl18 PE=1 SV=1;sp|P12001|RL18_RAT 60S ribosomal protein L18 OS=Rattus norvegicus OX=10116 GN=Rpl18 PE=1 SV=2	2	1	1	1	0	1	0	1	0	1	7.4	7.4	7.4	21.786	189	189;188	0.0034014	7.7846	0	7.4	8136800	0	8136800	0	6131900	0	1	1				76	178	TRUE	183	399;400	437;438	437
G3V7U2;A0A0G2K5C6;P34926	G3V7U2;A0A0G2K5C6;P34926	1;1;1	1;1;1	1;1;1	Microtubule-associated protein 1A;MAP1A heavy chain;MAP1 light chain LC2	Map1a	tr|G3V7U2|G3V7U2_RAT Microtubule-associated protein 1 A, isoform CRA_c OS=Rattus norvegicus OX=10116 GN=Map1a PE=1 SV=1;tr|A0A0G2K5C6|A0A0G2K5C6_RAT Microtubule-associated protein 1A OS=Rattus norvegicus OX=10116 GN=Map1a PE=1 SV=1;sp|P34926|MAP1A_RAT Micr	3	1	1	1	0	1	0	1	0	1	0.7	0.7	0.7	299.66	2776	2776;3014;2774	0.0035461	10.384	0	0.7	7996900	0	7996900	0	6026500	0	1	1				48	2148	TRUE	2184	4632	5035	5035
G3V953	G3V953	2	2	2		Rbbp6	tr|G3V953|G3V953_RAT RB-binding protein 6, ubiquitin ligase OS=Rattus norvegicus OX=10116 GN=Rbbp6 PE=1 SV=1	1	2	2	2	2	0	2	0	2	0	1	1	1	199.85	1789	1789	0.0035971	10.795	1	0	7950600	7950600	0	7950600	0	1	0	1				216	1285;2157	True;True	1304;2193	2731;4645	2938;5048	2938;5048
F1M349;A0A096MJH5;Q9JKY2;A0A096MIX7;A0A0G2JWR6;D4A6Z4	F1M349;A0A096MJH5;Q9JKY2;A0A096MIX7;A0A0G2JWR6;D4A6Z4	2;2;2;2;2;1	2;2;2;2;2;1	2;2;2;2;2;1		Zic5;Zic3;Zic1;Zic4	tr|F1M349|F1M349_RAT Zic family member 5 OS=Rattus norvegicus OX=10116 GN=Zic5 PE=4 SV=2;tr|A0A096MJH5|A0A096MJH5_RAT Zic family member 3 OS=Rattus norvegicus OX=10116 GN=Zic3 PE=4 SV=1;tr|Q9JKY2|Q9JKY2_RAT Zic family member 1 OS=Rattus norvegicus OX=10116	6	2	2	2	0	2	0	2	0	2	7.2	7.2	7.2	29.483	265	265;437;447;466;529;326	0	11.798	0	7.2	7769400	0	7769400	0	5855000	0	2	2				1	1875;2175	True;True	1903;2211	4010;4684	4355;5110	4355;5110
A0A0A0MXY4;A0A1W2Q676;F1LP64-2;F1LP64	A0A0A0MXY4;A0A1W2Q676;F1LP64-2;F1LP64	11;11;11;11	1;1;1;1	1;1;1;1	E3 ubiquitin-protein ligase TRIP12	Trip12	tr|A0A0A0MXY4|A0A0A0MXY4_RAT E3 ubiquitin-protein ligase TRIP12 OS=Rattus norvegicus OX=10116 GN=Trip12 PE=1 SV=2;tr|A0A1W2Q676|A0A1W2Q676_RAT E3 ubiquitin-protein ligase TRIP12 OS=Rattus norvegicus OX=10116 GN=Trip12 PE=1 SV=1;sp|F1LP64-2|TRIPC_RAT Isofor	4	11	1	1	8	10	0	1	0	1	8.2	0.6	0.6	218.1	1975	1975;1976;1976;2025	0.0059172	6.1111	6.7	8	7002000	0	7002000	0	5276700	0	1	1				7	67;75;858;1154;1370;1569;1839;1895;2048;2072;2215	False;False;False;False;False;False;False;False;False;False;True	69;77;875;1172;1389;1595;1867;1927;2081;2105;2252	150;151;152;153;170;171;1833;1834;2480;2913;2914;3340;3341;3935;3936;4077;4405;4406;4451;4766	166;167;168;169;186;187;1973;1974;2681;3160;3161;3611;3612;4280;4281;4434;4777;4778;4828;5199	169;186;1973;2681;3161;3611;4280;4434;4777;4828;5199
Q01714	Q01714	5	1	1	Transcription factor Sp1	Sp1	sp|Q01714|SP1_RAT Transcription factor Sp1 OS=Rattus norvegicus OX=10116 GN=Sp1 PE=1 SV=2	1	5	1	1	1	5	0	1	0	1	7.1	3.6	3.6	80.771	786	786	0.0034843	8.7549	1.1	7.1	6841800	0	6841800	0	5156000	0	1	1				288	580;604;1722;2405;2527	False;False;False;True;False	593;617;1749;2444;2570	1228;1229;1275;1276;1277;3662;3663;5249;5526	1334;1335;1381;1382;1383;3965;3966;5743;6032	1335;1381;3965;5743;6032
A0A0G2K5I8	A0A0G2K5I8	1	1	1			tr|A0A0G2K5I8|A0A0G2K5I8_RAT Zinc finger protein 62 OS=Rattus norvegicus OX=10116 GN=Zfp62 PE=4 SV=1	1	1	1	1	0	1	0	1	0	1	1.4	1.4	1.4	105.25	917	917	0.0032468	6.8742	0	1.4	6616500	0	6616500	0	4986200	0	1	1				50	1902	TRUE	1934	4094	4454	4454
D4A235	D4A235	1	1	1		Zfp580	tr|D4A235|D4A235_RAT Zinc finger protein 580 OS=Rattus norvegicus OX=10116 GN=Zfp580 PE=4 SV=1	1	1	1	1	1	0	1	0	1	0	7.6	7.6	7.6	18.836	172	172	0.0033898	7.72	7.6	0	6539400	6539400	0	6539400	0	1	0	1				159	1721	TRUE	1748	3661	3964	3964
D3ZKC9	D3ZKC9	1	1	1		RGD1559904	tr|D3ZKC9|D3ZKC9_RAT Similar to mKIAA1429 protein OS=Rattus norvegicus OX=10116 GN=Virma PE=1 SV=3	1	1	1	1	1	0	1	0	1	0	0.8	0.8	0.8	201.53	1811	1811	0.0058309	6.0699	0.8	0	6224200	6224200	0	6224200	0	1	0	1				139	534	TRUE	546	1133	1239	1239
P20909-6;P20909-4;P20909-5;P20909-3;P20909;P20909-2	P20909-6;P20909-4;P20909-5;P20909-3;P20909;P20909-2	1;1;1;1;1;1	1;1;1;1;1;1	1;1;1;1;1;1	Collagen alpha-1(XI) chain	Col11a1	sp|P20909-6|COBA1_RAT Isoform 6 of Collagen alpha-1(XI) chain OS=Rattus norvegicus OX=10116 GN=Col11a1;sp|P20909-4|COBA1_RAT Isoform 4 of Collagen alpha-1(XI) chain OS=Rattus norvegicus OX=10116 GN=Col11a1;sp|P20909-5|COBA1_RAT Isoform 5 of Collagen alpha-	6	1	1	1	1	1	1	1	1	1	0.6	0.6	0.6	166.85	1680	1680;1719;1731;1765;1804;1816	0.0030395	6.3602	0.6	0.6	6051100	0	6051100	0	4560100	1	1	2				249	2348	TRUE	2387	5086;5087	5558;5559	5558	25	177
B4F7C2;G3V7C6;Q6P9T8	B4F7C2;G3V7C6;Q6P9T8	1;1;1	1;1;1	1;1;1	Tubulin beta-4B chain	Tubb4a;Tubb4b	tr|B4F7C2|B4F7C2_RAT Tubulin beta chain OS=Rattus norvegicus OX=10116 GN=Tubb4a PE=1 SV=1;tr|G3V7C6|G3V7C6_RAT Tubulin beta chain OS=Rattus norvegicus OX=10116 GN=Tubb4b PE=1 SV=2;sp|Q6P9T8|TBB4B_RAT Tubulin beta-4B chain OS=Rattus norvegicus OX=10116 GN=T	3	1	1	1	0	1	0	1	0	1	4.3	4.3	4.3	49.585	444	444;548;445	0.0031447	6.6139	0	4.3	5980100	0	5980100	0	4506600	0	1	1				100	1455	TRUE	1478	3094	3351	3351
A0A0G2K3M5	A0A0G2K3M5	3	1	1			tr|A0A0G2K3M5|A0A0G2K3M5_RAT Zinc finger protein 281 OS=Rattus norvegicus OX=10116 GN=Zfp281 PE=1 SV=1	1	3	1	1	2	3	0	1	0	1	5.3	3.4	3.4	96.656	890	890	0.0035088	9.1305	1.9	5.3	5932100	0	5932100	0	4470400	0	1	1				43	564;613;2594	False;True;False	577;626;2638	1200;1201;1202;1203;1293;5677;5678;5679;5680	1306;1307;1308;1309;1401;6187;6188;6189;6190	1307;1401;6190
F1LST1;A0A096P6L8;P04937-4;P04937-2;P04937-3;P04937	F1LST1;A0A096P6L8;P04937-4;P04937-2;P04937-3;P04937	1;1;1;1;1;1	1;1;1;1;1;1	1;1;1;1;1;1	Fibronectin;Anastellin	Fn1	tr|F1LST1|F1LST1_RAT Fibronectin OS=Rattus norvegicus OX=10116 GN=Fn1 PE=1 SV=3;tr|A0A096P6L8|A0A096P6L8_RAT Fibronectin OS=Rattus norvegicus OX=10116 GN=Fn1 PE=1 SV=2;sp|P04937-4|FINC_RAT Isoform 4 of Fibronectin OS=Rattus norvegicus OX=10116 GN=Fn1;sp|P0	6	1	1	1	0	1	0	1	0	1	0.3	0.3	0.3	262.75	2387	2387;2477;2358;2387;2452;2477	0.0059701	6.1705	0	0.3	5929900	0	5929900	0	4468800	0	1	1				6	997	TRUE	1015	2116	2269	2269
D3ZII7	D3ZII7	1	1	1		Yaf2	tr|D3ZII7|D3ZII7_RAT YY1-associated factor 2 OS=Rattus norvegicus OX=10116 GN=Yaf2 PE=1 SV=3	1	1	1	1	0	1	0	1	0	1	14	14	14	19.626	179	179	0	16.218	0	14	5801600	0	5801600	0	4372100	0	1	1				133	1823	TRUE	1851	3895	4228	4228
Q9EQY1;Q9EQY2;G3V9V2	Q9EQY1;Q9EQY2;G3V9V2	1;1;1	1;1;1	1;1;1		elf-1;Elf1	tr|Q9EQY1|Q9EQY1_RAT E74-like ETS transcription factor 1 OS=Rattus norvegicus OX=10116 GN=Elf1 PE=2 SV=1;tr|Q9EQY2|Q9EQY2_RAT E74-like ETS transcription factor 1 OS=Rattus norvegicus OX=10116 GN=Elf1 PE=2 SV=1;tr|G3V9V2|G3V9V2_RAT E74-like ETS transcriptio	3	1	1	1	0	1	0	1	0	1	3.4	3.4	3.4	56.58	524	524;579;615	0.003003	6.2981	0	3.4	5751300	0	5751300	0	4334200	0	1	1				218	2366	TRUE	2405	5116	5588	5588
Q66HB1;A6H909	Q66HB1;A6H909	1;1	1;1	1;1	TATA box-binding protein-like protein 2	Tbp;Tbpl2	tr|Q66HB1|Q66HB1_RAT TATA box binding protein, isoform CRA_a OS=Rattus norvegicus OX=10116 GN=Tbp PE=1 SV=1;sp|A6H909|TBPL2_RAT TATA box-binding protein-like protein 2 OS=Rattus norvegicus OX=10116 GN=Tbpl2 PE=2 SV=1	2	1	1	1	0	1	0	1	0	1	3.1	3.1	3.1	34.951	318	318;344	0.0030488	6.4183	0	3.1	5240300	0	5240300	0	3949100	0	1	1				87	2326	TRUE	2365	5013	5466	5466
D3ZY39	D3ZY39	1	1	1		Rrp1b	tr|D3ZY39|D3ZY39_RAT Ribosomal RNA-processing 1B OS=Rattus norvegicus OX=10116 GN=Rrp1b PE=1 SV=3	1	1	1	1	1	1	1	1	1	1	2.6	2.6	2.6	81.475	733	733	0.003413	7.8446	2.6	2.6	5215200	3322800	1892400	2509200	2239700	2	1	3				152	102	TRUE	105	223;224;225	249;250;251	249
A0A0G2JX88;F1LQ88;P45446-1;P45446	A0A0G2JX88;F1LQ88;P45446-1;P45446	1;1;1;1	1;1;1;1	1;1;1;1	Nuclear receptor ROR-beta	Rorb	tr|A0A0G2JX88|A0A0G2JX88_RAT Nuclear receptor ROR-beta OS=Rattus norvegicus OX=10116 GN=Rorb PE=3 SV=1;tr|F1LQ88|F1LQ88_RAT Nuclear receptor ROR-beta OS=Rattus norvegicus OX=10116 GN=Rorb PE=3 SV=1;sp|P45446-1|RORB_RAT Isoform 1 of Nuclear receptor ROR-bet	4	1	1	1	0	1	0	1	0	1	2.8	2.8	2.8	52.027	459	459;470;459;470	0.005814	6.0575	0	2.8	4996600	0	4996600	0	3765400	0	1	1				22	362	TRUE	372	798	879	879
A0A096MJV7;A0A0G2JXQ2	A0A096MJV7;A0A0G2JXQ2	1;1	1;1	1;1		Chd9	tr|A0A096MJV7|A0A096MJV7_RAT Chromodomain helicase DNA-binding protein 9 (Fragment) OS=Rattus norvegicus OX=10116 GN=Chd9 PE=4 SV=1;tr|A0A0G2JXQ2|A0A0G2JXQ2_RAT Chromodomain helicase DNA-binding protein 9 OS=Rattus norvegicus OX=10116 GN=Chd9 PE=1 SV=1	2	1	1	1	1	0	1	0	1	0	1.3	1.3	1.3	126.16	1156	1156;2596	0.0033113	7.1401	1.3	0	4699200	4699200	0	4699200	0	1	0	1				4	462	TRUE	474	995	1093	1093
Q5XIT9	Q5XIT9	2	2	2	Methylcrotonoyl-CoA carboxylase beta chain, mitochondrial	Mccc2	sp|Q5XIT9|MCCB_RAT Methylcrotonoyl-CoA carboxylase beta chain, mitochondrial OS=Rattus norvegicus OX=10116 GN=Mccc2 PE=2 SV=1	1	2	2	2	0	2	0	2	0	2	5.2	5.2	5.2	61.516	563	563	0	11.302	0	5.2	4674700	0	4674700	0	3522900	0	2	2				314	163;1257	True;True	168;1276	367;2681	404;2888	404;2888
G3V9A5;Q7TQM5	G3V9A5;Q7TQM5	1;1	1;1	1;1	Keratinocyte proline-rich protein	Kprp	tr|G3V9A5|G3V9A5_RAT Keratinocyte proline-rich protein OS=Rattus norvegicus OX=10116 GN=Kprp PE=4 SV=1;sp|Q7TQM5|KPRP_RAT Keratinocyte proline-rich protein OS=Rattus norvegicus OX=10116 GN=Kprp PE=2 SV=1	2	1	1	1	0	1	0	1	0	1	1.4	1.4	1.4	76.412	699	699;699	0.0058824	6.1048	0	1.4	4475200	0	4475200	0	3372500	0	1	1				217	912	TRUE	929	1935	2075	2075
B0BN98	B0BN98	1	1	1		Llph	tr|B0BN98|B0BN98_RAT LLP homolog, long-term synaptic facilitation OS=Rattus norvegicus OX=10116 GN=Llph PE=1 SV=1	1	1	1	1	1	1	1	1	1	1	12.7	12.7	12.7	14.932	126	126	0.0059524	6.1549	12.7	12.7	4362400	2334400	2028100	2334400	1528300	1	1	2				88	2262	TRUE	2299	4865;4866	5299;5300	5299
A0A0H2UHM7;Q6AYZ1;Q6P9V9;P68370;Q68FR8	A0A0H2UHM7;Q6AYZ1;Q6P9V9;P68370;Q68FR8	2;2;2;2;1	2;2;2;2;1	2;2;2;2;1	Tubulin alpha-1C chain;Tubulin alpha-1B chain;Tubulin alpha-1A chain;Tubulin alpha-3 chain	Tuba1c;Tuba1b;Tuba1a;Tuba3a	tr|A0A0H2UHM7|A0A0H2UHM7_RAT Tubulin alpha chain OS=Rattus norvegicus OX=10116 GN=LOC100909441 PE=3 SV=1;sp|Q6AYZ1|TBA1C_RAT Tubulin alpha-1C chain OS=Rattus norvegicus OX=10116 GN=Tuba1c PE=1 SV=1;sp|Q6P9V9|TBA1B_RAT Tubulin alpha-1B chain OS=Rattus norve	5	2	2	2	1	1	1	1	1	1	6.7	6.7	6.7	49.806	448	448;449;451;451;450	0.0036364	10.836	2.2	4.5	4274300	1714100	2560200	0	1929400	1	1	2				72	240;377	True;True	248;388	521;828	572;909	572;909
F1M0V5;M0R893	F1M0V5;M0R893	1;1	1;1	1;1		Slx4ip	tr|F1M0V5|F1M0V5_RAT SLX4-interacting protein OS=Rattus norvegicus OX=10116 GN=Slx4ip PE=4 SV=3;tr|M0R893|M0R893_RAT SLX4-interacting protein OS=Rattus norvegicus OX=10116 GN=Slx4ip PE=4 SV=2	2	1	1	1	0	1	0	1	0	1	5.1	5.1	5.1	45.543	413	413;426	0.003367	7.4487	0	5.1	4240300	0	4240300	0	3195500	0	1	1				192	863	TRUE	880	1840	1980	1980
P07936	P07936	1	1	1	Neuromodulin	Gap43	sp|P07936|NEUM_RAT Neuromodulin OS=Rattus norvegicus OX=10116 GN=Gap43 PE=1 SV=1	1	1	1	1	1	0	1	0	1	0	8.4	8.4	8.4	23.603	226	226	0.0033557	7.4297	8.4	0	3679900	3679900	0	3679900	0	1	0	1				238	493	TRUE	505	1056	1159	1159
D3ZGX1	D3ZGX1	1	1	1	Protein KIAA2022 homolog		sp|D3ZGX1|NEXMI_RAT Neurite extension and migration factor OS=Rattus norvegicus OX=10116 GN=Nexmif PE=1 SV=1	1	1	1	1	0	1	0	1	0	1	0.7	0.7	0.7	166.66	1517	1517	0.003012	6.3154	0	0.7	3630400	0	3630400	0	2735800	0	1	1				130	963	TRUE	980	2046	2192	2192
Q6PDV6;P13471	Q6PDV6;P13471	2;2	2;2	2;2	40S ribosomal protein S14	Rps14	tr|Q6PDV6|Q6PDV6_RAT 40S ribosomal protein S14-like OS=Rattus norvegicus OX=10116 GN=LOC100911847 PE=2 SV=1;sp|P13471|RS14_RAT 40S ribosomal protein S14 OS=Rattus norvegicus OX=10116 GN=Rps14 PE=2 SV=3	2	2	2	2	0	2	0	2	0	2	17.9	17.9	17.9	16.273	151	151;151	0	14.363	0	17.9	3506400	0	3506400	0	2642400	0	2	2				241	924;2283	True;True	941;2321	1958;4910	2101;5344	2101;5344
D3ZXI2;P13084-2;P13084;D3ZP59	D3ZXI2;P13084-2;P13084;D3ZP59	3;3;3;2	3;3;3;2	3;3;3;2	Nucleophosmin	Npm1	tr|D3ZXI2|D3ZXI2_RAT Uncharacterized protein OS=Rattus norvegicus OX=10116 PE=4 SV=2;sp|P13084-2|NPM_RAT Isoform B23.2 of Nucleophosmin OS=Rattus norvegicus OX=10116 GN=Npm1;sp|P13084|NPM_RAT Nucleophosmin OS=Rattus norvegicus OX=10116 GN=Npm1 PE=1 SV=1;tr	4	3	3	3	2	3	2	3	2	3	7.4	7.4	7.4	27.296	243	243;257;292;247	0	18.428	7.4	7.4	3480000	0	3480000	0	2622500	2	3	5				151	764;765;1447	True;True;True	780;781;1469	1615;1616;1617;3078;3079	1745;1746;1747;3335;3336	1745;1746;3336
A0A0G2K0B0;Q5XIM5	A0A0G2K0B0;Q5XIM5	1;1	1;1	1;1	Protein CDV3 homolog	Cdv3	tr|A0A0G2K0B0|A0A0G2K0B0_RAT Protein CDV3 homolog OS=Rattus norvegicus OX=10116 GN=Cdv3 PE=1 SV=1;sp|Q5XIM5|CDV3_RAT Protein CDV3 homolog OS=Rattus norvegicus OX=10116 GN=Cdv3 PE=1 SV=1	2	1	1	1	1	0	1	0	1	0	10.7	10.7	10.7	29.647	281	281;236	0.0030864	6.4343	10.7	0	3459600	3459600	0	3459600	0	1	0	1				31	24	TRUE	24	62	78	78
P08082-2;P08082	P08082-2;P08082	1;1	1;1	1;1	Clathrin light chain B	Cltb	sp|P08082-2|CLCB_RAT Isoform Non-brain of Clathrin light chain B OS=Rattus norvegicus OX=10116 GN=Cltb;sp|P08082|CLCB_RAT Clathrin light chain B OS=Rattus norvegicus OX=10116 GN=Cltb PE=1 SV=1	2	1	1	1	1	0	1	0	1	0	4.7	4.7	4.7	23.12	211	211;229	0.003096	6.4558	4.7	0	3382500	3382500	0	3382500	0	1	0	1				239	2372	TRUE	2411	5130	5602	5602
Q5XIQ3;F8WFL6	Q5XIQ3;F8WFL6	4;3	2;1	2;1	CXXC-type zinc finger protein 5	Cxxc5	sp|Q5XIQ3|CXXC5_RAT CXXC-type zinc finger protein 5 OS=Rattus norvegicus OX=10116 GN=Cxxc5 PE=1 SV=1;tr|F8WFL6|F8WFL6_RAT CXXC-type zinc finger protein 5 OS=Rattus norvegicus OX=10116 GN=Cxxc5 PE=4 SV=3	2	4	2	2	0	4	0	2	0	2	17.7	12	12	32.626	316	316;302	0	12.273	0	17.7	3354100	0	3354100	0	2527700	0	1	1				313	584;976;1562;2116	False;True;False;True	597;994;1588;2151	1236;2077;3330;4561	1342;2223;3601;4950	1342;2223;3601;4950
I6L9G6	I6L9G6	1	1	1		Tardbp	tr|I6L9G6|I6L9G6_RAT RCG31562, isoform CRA_c OS=Rattus norvegicus OX=10116 GN=Tardbp PE=1 SV=1	1	1	1	1	0	1	0	1	0	1	4.2	4.2	4.2	32.147	285	285	0.0032258	6.7655	0	4.2	3308700	0	3308700	0	2493400	0	1	1				221	1128	TRUE	1146	2395	2561	2561
D4A2P1	D4A2P1	1	1	1		Ccar1	tr|D4A2P1|D4A2P1_RAT Cell division cycle and apoptosis regulator 1 OS=Rattus norvegicus OX=10116 GN=Ccar1 PE=1 SV=2	1	1	1	1	0	1	0	1	0	1	0.8	0.8	0.8	132.15	1148	1148	0.0030769	6.4284	0	0.8	3260900	0	3260900	0	2457400	0	1	1				160	1020	TRUE	1038	2156	2313	2313
Q4QQV8	Q4QQV8	1	1	1	Charged multivesicular body protein 5	Chmp5	sp|Q4QQV8|CHMP5_RAT Charged multivesicular body protein 5 OS=Rattus norvegicus OX=10116 GN=Chmp5 PE=2 SV=1	1	1	1	1	0	1	0	1	0	1	3.2	3.2	3.2	24.575	219	219	0.002994	6.2905	0	3.2	3204900	0	3204900	0	2415200	0	1	1				300	1443	TRUE	1464	3067	3318	3318
F1LXC0	F1LXC0	2	2	2		Zfp236	tr|F1LXC0|F1LXC0_RAT Zinc finger protein 236 OS=Rattus norvegicus OX=10116 GN=Zfp236 PE=4 SV=3	1	2	2	2	1	2	1	2	1	2	1.1	1.1	1.1	203.39	1848	1848	0	13.041	0.6	1.1	3060800	0	3060800	0	2306600	1	2	3				190	755;988	True;True	770;1006	1591;2100;2101	1718;2253;2254	1718;2254
M9MMM9;A0A0G2JU82;A0A0G2JWA8;A0A0G2K9T4;D3ZHV2	M9MMM9;A0A0G2JU82;A0A0G2JWA8;A0A0G2K9T4;D3ZHV2	1;1;1;1;1	1;1;1;1;1	1;1;1;1;1	Microtubule-actin cross-linking factor 1	Macf1	tr|M9MMM9|M9MMM9_RAT Microtubule-actin cross-linking factor 1 OS=Rattus norvegicus OX=10116 GN=Macf1 PE=1 SV=2;tr|A0A0G2JU82|A0A0G2JU82_RAT Microtubule-actin cross-linking factor 1 OS=Rattus norvegicus OX=10116 GN=Macf1 PE=1 SV=1;tr|A0A0G2JWA8|A0A0G2JWA8_R	5	1	1	1	0	1	0	1	0	1	0.4	0.4	0.4	611.47	5358	5358;5358;7351;7384;5430	0	18.054	0	0.4	2888500	0	2888500	0	2176800	0	1	1				13	2316	TRUE	2355	4993	5444	5444
M0RC54	M0RC54	2	2	2		Bod1l1	tr|M0RC54|M0RC54_RAT Biorientation of chromosomes in cell division 1-like 1 OS=Rattus norvegicus OX=10116 GN=Bod1l1 PE=1 SV=2	1	2	2	2	2	0	2	0	2	0	0.8	0.8	0.8	328.57	3040	3040	0.0036496	10.93	0.8	0	2830300	2830300	0	2830300	0	2	0	2				230	2137;2361	True;True	2172;2400	4610;5106	5011;5578	5011;5578
A0A0G2JUF8;A0A0G2JWP8;P41516	A0A0G2JUF8;A0A0G2JWP8;P41516	2;2;2	2;2;2	2;2;2	DNA topoisomerase 2-alpha	Top2a	tr|A0A0G2JUF8|A0A0G2JUF8_RAT DNA topoisomerase 2 OS=Rattus norvegicus OX=10116 GN=Top2a PE=1 SV=1;tr|A0A0G2JWP8|A0A0G2JWP8_RAT DNA topoisomerase 2 OS=Rattus norvegicus OX=10116 GN=Top2a PE=1 SV=1;sp|P41516|TOP2A_RAT DNA topoisomerase 2-alpha OS=Rattus norv	3	2	2	2	1	1	1	1	1	1	1.3	1.3	1.3	172.43	1520	1520;1528;1526	0	11.879	0.5	0.8	2795700	0	2795700	0	2106800	1	0	1				14	457;2442	True;True	469;2482	988;5338	1086;5832	1086;5832
D3ZZ24	D3ZZ24	4	1	1		Sp9	tr|D3ZZ24|D3ZZ24_RAT Sp9 transcription factor OS=Rattus norvegicus OX=10116 GN=Sp9 PE=4 SV=1	1	4	1	1	1	4	0	1	0	1	10.3	6.4	6.4	49.03	485	485	0	12.679	1.9	10.3	2665500	0	2665500	0	2008700	0	1	1				153	1;580;604;1722	True;False;False;False	1;593;617;1749	1;1228;1229;1275;1276;1277;3662;3663	1;1334;1335;1381;1382;1383;3965;3966	1;1335;1381;3965
Q8K4H4	Q8K4H4	1	1	1	Aprataxin	Aptx	sp|Q8K4H4|APTX_RAT Aprataxin OS=Rattus norvegicus OX=10116 GN=Aptx PE=2 SV=1	1	1	1	1	0	1	0	1	0	1	3.6	3.6	3.6	37.719	329	329	0.0030303	6.3178	0	3.6	2512100	0	2512100	0	1893100	0	1	1				336	1681	TRUE	1708	3566	3848	3848
Q5M963;P69060	Q5M963;P69060	1;1	1;1	1;1	N-acylneuraminate cytidylyltransferase	Cmas	tr|Q5M963|Q5M963_RAT Cytidine monophosphate N-acetylneuraminic acid synthetase OS=Rattus norvegicus OX=10116 GN=Cmas PE=1 SV=1;sp|P69060|NEUA_RAT N-acylneuraminate cytidylyltransferase OS=Rattus norvegicus OX=10116 GN=Cmas PE=2 SV=1	2	1	1	1	0	1	0	1	0	1	3.5	3.5	3.5	48.14	432	432;432	0.0032154	6.762	0	3.5	2351900	0	2351900	0	1772400	0	1	1				281	732	TRUE	747	1550	1677	1677
A0A0G2K3H8;A0A0G2JY41;Q9WTY8	A0A0G2K3H8;A0A0G2JY41;Q9WTY8	1;1;1	1;1;1	1;1;1	Zinc finger and BTB domain-containing protein 10	Zbtb10	tr|A0A0G2K3H8|A0A0G2K3H8_RAT Zinc finger and BTB domain-containing protein 10 OS=Rattus norvegicus OX=10116 GN=Zbtb10 PE=4 SV=1;tr|A0A0G2JY41|A0A0G2JY41_RAT Zinc finger and BTB domain-containing protein 10 OS=Rattus norvegicus OX=10116 GN=Zbtb10 PE=4 SV=1;	3	1	1	1	0	1	0	1	0	1	1.7	1.7	1.7	91.553	835	835;836;836	0.0031746	6.6614	0	1.7	2243200	0	2243200	0	1690500	0	1	1				24	2397	TRUE	2436	5213	5698	5698
E9PT11	E9PT11	1	1	1		Cbx6	tr|E9PT11|E9PT11_RAT Chromobox 6 OS=Rattus norvegicus OX=10116 GN=Cbx6 PE=4 SV=1	1	1	1	1	0	1	0	1	0	1	2.3	2.3	2.3	42.484	396	396	0.0086705	6.0459	0	2.3	2233000	0	2233000	0	1682800	0	1	1				175	1264	TRUE	1283	2690	2897	2897
Q4KLJ3	Q4KLJ3	2	2	2		Gnl2	tr|Q4KLJ3|Q4KLJ3_RAT Nucleolar GTP-binding protein 2 OS=Rattus norvegicus OX=10116 GN=Gnl2 PE=1 SV=1	1	2	2	2	1	1	1	1	1	1	2.7	2.7	2.7	83.868	734	734	0.0035714	10.731	1.4	1.4	2070500	2070500	0	2070500	0	0	1	1				298	1113;2617	True;True	1131;2661	2361;5732	2526;6243	2526;6243
A0A0G2JUZ3;D4AB13	A0A0G2JUZ3;D4AB13	1;1	1;1	1;1		Mypop	tr|A0A0G2JUZ3|A0A0G2JUZ3_RAT Myb-related transcription factor, partner of profilin OS=Rattus norvegicus OX=10116 GN=Mypop PE=4 SV=1;tr|D4AB13|D4AB13_RAT Myb-related transcription factor, partner of profilin OS=Rattus norvegicus OX=10116 GN=Mypop PE=4 SV=1	2	1	1	1	0	1	0	1	0	1	2.8	2.8	2.8	41.594	391	391;392	0.0031847	6.6697	0	2.8	2046800	0	2046800	0	1542400	0	0	0				17	587	TRUE	600	1239	1345	1345
Q6AYI1	Q6AYI1	1	1	1		Ddx5	tr|Q6AYI1|Q6AYI1_RAT DEAD (Asp-Glu-Ala-Asp) box polypeptide 5 OS=Rattus norvegicus OX=10116 GN=Ddx5 PE=1 SV=1	1	1	1	1	0	1	0	1	0	1	2	2	2	69.238	615	615	0.0059347	6.1199	0	2	1993900	0	1993900	0	1502600	0	0	0				326	1504	TRUE	1530	3193	3460	3460
P62078	P62078	1	1	1	Mitochondrial import inner membrane translocase subunit Tim8 B	Timm8b	sp|P62078|TIM8B_RAT Mitochondrial import inner membrane translocase subunit Tim8 B OS=Rattus norvegicus OX=10116 GN=Timm8b PE=3 SV=1	1	1	1	1	1	0	1	0	1	0	15.7	15.7	15.7	9.2864	83	83	0.0033003	7.0986	15.7	0	1896000	1896000	0	1896000	0	1	0	1				269	53	TRUE	55	118	134	134
Q3B8Q2	Q3B8Q2	1	1	1	Eukaryotic initiation factor 4A-III;Eukaryotic initiation factor 4A-III, N-terminally processed	Eif4a3	sp|Q3B8Q2|IF4A3_RAT Eukaryotic initiation factor 4A-III OS=Rattus norvegicus OX=10116 GN=Eif4a3 PE=1 SV=1	1	1	1	1	1	0	1	0	1	0	3.2	3.2	3.2	46.84	411	411	0.003268	6.9032	3.2	0	1578900	1578900	0	1578900	0	1	0	1				291	33	TRUE	33	81	97	97
D3ZC82	D3ZC82	1	1	1		LOC687994	tr|D3ZC82|D3ZC82_RAT NUFIP2, FMR1-interacting protein 2 OS=Rattus norvegicus OX=10116 GN=Nufip2 PE=1 SV=2	1	1	1	1	0	1	0	1	0	1	1.9	1.9	1.9	75.66	691	691	0.0032362	6.8163	0	1.9	1522900	0	1522900	0	1147600	0	1	1				121	1542	TRUE	1568	3281	3551	3551
D4A5H6;A0A0G2KB10	D4A5H6;A0A0G2KB10	1;1	1;1	1;1	Histone-lysine N-methyltransferase	Setd2	tr|D4A5H6|D4A5H6_RAT Kinesin family member 9 (Predicted) OS=Rattus norvegicus OX=10116 GN=Setd2 PE=1 SV=2;tr|A0A0G2KB10|A0A0G2KB10_RAT SET domain-containing 2 OS=Rattus norvegicus OX=10116 GN=Setd2 PE=1 SV=1	2	1	1	1	0	1	0	1	0	1	0.4	0.4	0.4	259.31	2294	2294;2523	0.0058651	6.081	0	0.4	0	0	0	0	0	0	1	1				67	1964	TRUE	1996	4232	4598	4598
D3ZUE5;B2RYG1	D3ZUE5;B2RYG1	1;1	1;1	1;1	Protein FAM32A	LOC365238;Fam32a	tr|D3ZUE5|D3ZUE5_RAT RCG54360 OS=Rattus norvegicus OX=10116 GN=LOC365238 PE=4 SV=1;sp|B2RYG1|FA32A_RAT Protein FAM32A OS=Rattus norvegicus OX=10116 GN=Fam32a PE=3 SV=1	2	1	1	1	1	1	1	1	1	1	7.8	7.8	7.8	13.629	116	116;112	0.0032051	6.7141	7.8	7.8	0	0	0	0	0	1	1	2				95	2277	TRUE	2315	4896;4897	5330;5331	5331
D4A601;B2RYT9	D4A601;B2RYT9	1;1	1;1	1;1	Translational activator of cytochrome c oxidase 1	Taco1	tr|D4A601|D4A601_RAT Translational activator of cytochrome c oxidase 1 OS=Rattus norvegicus OX=10116 GN=Taco1 PE=1 SV=3;sp|B2RYT9|TACO1_RAT Translational activator of cytochrome c oxidase 1 OS=Rattus norvegicus OX=10116 GN=Taco1 PE=2 SV=1	2	1	1	1	0	1	0	1	0	1	2.4	2.4	2.4	32.812	295	295;295	1	-2	0	2.4	0	0	0	0	0	0	1	1	+			97	1468	TRUE	1492	3112	3369	3369	3	2
Q6AY48;Q4V8F6;Q6AYU5	Q6AY48;Q4V8F6;Q6AYU5	1;1;1	1;1;1	1;1;1		Pcbp3;Pcbp2	tr|Q6AY48|Q6AY48_RAT Poly(rC)-binding protein 3 OS=Rattus norvegicus OX=10116 GN=Pcbp3 PE=1 SV=1;tr|Q4V8F6|Q4V8F6_RAT Pcbp2 protein OS=Rattus norvegicus OX=10116 GN=Pcbp2 PE=1 SV=1;tr|Q6AYU5|Q6AYU5_RAT Poly(rC)-binding protein 2 OS=Rattus norvegicus OX=101	3	1	1	1	0	1	0	1	0	1	3.4	3.4	3.4	33.784	319	319;335;365	0.0034965	8.8407	0	3.4	0	0	0	0	0	0	1	1				303	978	TRUE	996	2084	2230	2230
Q6AYJ1	Q6AYJ1	1	1	1	ATP-dependent DNA helicase Q1	Recql	sp|Q6AYJ1|RECQ1_RAT ATP-dependent DNA helicase Q1 OS=Rattus norvegicus OX=10116 GN=Recql PE=1 SV=1	1	1	1	1	1	0	1	0	1	0	1.6	1.6	1.6	69.641	621	621	0.0086455	6.0407	1.6	0	0	0	0	0	0	1	0	1				327	2423	TRUE	2462	5287	5781	5781

## Sheet: Replicate2
Protein IDs	Majority protein IDs	Peptide counts (all)	Peptide counts (razor+unique)	Peptide counts (unique)	Protein names	Gene names	Fasta headers	Number of proteins	Peptides	Razor + unique peptides	Unique peptides	Peptides +11kb_probe	Peptides +3kb_probe	Razor + unique peptides +11kb_probe	Razor + unique peptides +3kb_probe	Unique peptides +11kb_probe	Unique peptides +3kb_probe	Sequence coverage [%]	Unique + razor sequence coverage [%]	Unique sequence coverage [%]	Mol. weight [kDa]	Sequence length	Sequence lengths	Q-value	Score	Sequence coverage +11kb_probe [%]	Sequence coverage +3kb_probe [%]	Intensity	Intensity +11kb_probe	Intensity +3kb_probe	LFQ intensity +11kb_probe	LFQ intensity +3kb_probe	MS/MS count +11kb_probe	MS/MS count +3kb_probe	MS/MS count	Only identified by site	Reverse	Potential contaminant	id	Peptide IDs	Peptide is razor	Mod. peptide IDs	Evidence IDs	MS/MS IDs	Best MS/MS	Oxidation (M) site IDs	Oxidation (M) site positions
P63090	P63090	25	25	25	Pleiotrophin	Ptn	sp|P63090|PTN_RAT Pleiotrophin OS=Rattus norvegicus OX=10116 GN=Ptn PE=1 SV=1	1	25	25	25	22	23	22	23	22	23	64.3	64.3	64.3	18.869	168	168	0	323.31	64.3	64.3	8081200000	3304500000	4776700000	3966500000	3930200000	73	87	160				161	61;62;132;133;203;482;549;550;559;560;667;832;833;834;875;947;948;949;1141;1142;1207;1208;1253;1365;1366	True;True;True;True;True;True;True;True;True;True;True;True;True;True;True;True;True;True;True;True;True;True;True;True;True	63;64;134;135;205;485;552;553;562;563;670;842;843;844;886;959;960;961;1162;1163;1231;1232;1277;1391;1392	120;121;122;123;124;125;126;127;128;129;241;242;243;244;245;246;247;248;249;250;251;252;253;254;255;256;257;258;259;260;261;262;397;906;907;1030;1031;1032;1053;1054;1055;1056;1057;1058;1059;1060;1061;1062;1063;1064;1065;1066;1237;1238;1239;1240;1553;1554;1555;1556;1557;1558;1559;1560;1644;1645;1805;1806;1807;1808;1809;1810;1811;1812;1813;2194;2195;2196;2197;2311;2312;2313;2314;2315;2316;2317;2318…	128;129;130;131;132;133;134;135;136;137;138;139;140;141;260;261;262;263;264;265;266;267;268;269;270;271;272;273;274;275;276;277;278;279;280;281;282;283;284;285;286;287;288;289;290;291;292;444;984;985;986;987;988;1122;1123;1124;1154;1155;1156;1157;1158;1159;1160;1161;1162;1163;1164;1165;1166;1167;1168;1169;1170;1345;1346;1347;1348;1349;1350;1686;1687;1688;1689;1690;1691;1692;1693;1694;1780;1781;19…	130;140;261;285;444;984;1122;1123;1154;1169;1350;1687;1690;1693;1781;1997;1998;2002;2425;2428;2546;2580;2824;3060;3069
Q00566-2;A0A0G2JWK2;Q00566	Q00566-2;A0A0G2JWK2;Q00566	49;48;48	49;48;48	49;48;48	Isoform B of Methyl-CpG-binding protein 2	Mecp2	sp|Q00566-2|MECP2_RAT Isoform B of Methyl-CpG-binding protein 2 OS=Rattus norvegicus OX=10116 GN=Mecp2;tr|A0A0G2JWK2|A0A0G2JWK2_RAT Methyl-CpG-binding protein 2 OS=Rattus norvegicus OX=10116 GN=Mecp2 PE=1 SV=1;sp|Q00566|MECP2_RAT Methyl-CpG-binding protein	3	49	49	49	43	44	43	44	43	44	78.7	78.7	78.7	55.082	520	520;492;492	0	323.31	75.4	78.1	3352400000	1649500000	1702900000	1680400000	1594000000	72	82	154				165	0;1;2;22;42;43;84;152;172;173;196;202;231;232;234;235;306;307;376;377;379;404;504;547;548;566;639;640;737;738;891;935;936;960;961;1010;1027;1032;1067;1120;1121;1122;1183;1184;1188;1240;1241;1263;1333	True;True;True;True;True;True;True;True;True;True;True;True;True;True;True;True;True;True;True;True;True;True;True;True;True;True;True;True;True;True;True;True;True;True;True;True;True;True;True;True;True;True;True;True;True;True;True;True;True	0;1;2;22;42;43;44;86;154;174;175;198;204;233;234;236;237;308;309;378;379;381;407;507;550;551;569;642;643;743;744;745;902;947;948;972;973;1029;1046;1047;1052;1087;1141;1142;1143;1205;1206;1211;1264;1265;1288;1358	0;1;2;3;4;5;39;74;75;76;77;78;79;80;159;160;296;297;298;341;342;343;344;345;346;347;388;396;446;447;448;450;451;452;453;454;578;579;580;581;582;718;719;720;721;723;724;725;726;778;938;1025;1026;1027;1028;1029;1075;1076;1193;1194;1195;1196;1197;1361;1362;1363;1364;1365;1692;1773;1774;1775;1776;1777;1778;1779;1780;1781;1833;1834;1835;1836;1837;1931;1932;1933;1962;1963;1964;1965;1966;1967;1968;1976;…	0;1;2;3;4;5;42;80;81;82;83;84;85;86;87;171;172;327;328;329;330;386;387;388;389;390;391;392;393;435;443;495;496;497;499;500;501;502;503;504;505;639;640;641;642;643;782;783;784;785;786;788;789;790;791;792;793;850;1022;1116;1117;1118;1119;1120;1121;1179;1180;1298;1299;1300;1301;1302;1471;1472;1473;1474;1475;1476;1477;1854;1957;1958;1959;1960;1961;1962;1963;1964;1965;1966;1967;2023;2024;2025;2026;202…	1;3;5;42;81;86;171;329;387;391;435;443;495;496;501;505;639;642;782;786;792;850;1022;1117;1120;1179;1299;1301;1471;1475;1854;1959;1965;2024;2026;2132;2172;2187;2255;2373;2383;2392;2502;2503;2517;2793;2799;2853;2991	13;14;15	122;252;465
Q9JJ54-3;Q9JJ54;Q9JJ54-4;Q9JJ54-2;M0R9X3	Q9JJ54-3;Q9JJ54;Q9JJ54-4;Q9JJ54-2	36;36;35;35;1	36;36;35;35;1	34;34;33;33;0	Isoform 3 of Heterogeneous nuclear ribonucleoprotein D0	Hnrnpd	sp|Q9JJ54-3|HNRPD_RAT Isoform 3 of Heterogeneous nuclear ribonucleoprotein D0 OS=Rattus norvegicus OX=10116 GN=Hnrnpd;sp|Q9JJ54|HNRPD_RAT Heterogeneous nuclear ribonucleoprotein D0 OS=Rattus norvegicus OX=10116 GN=Hnrnpd PE=1 SV=2;sp|Q9JJ54-4|HNRPD_RAT Iso	5	36	36	34	34	29	34	29	32	28	57.6	57.6	57.6	32.672	304	304;353;285;334;565	0	323.31	57.6	53.6	1775900000	1141800000	634140000	1195100000	557570000	53	44	97				196	126;161;183;228;229;239;240;250;310;311;312;320;322;323;418;440;441;442;471;485;486;533;534;573;574;643;704;705;706;884;1082;1083;1214;1344;1345;1346	True;True;True;True;True;True;True;True;True;True;True;True;True;True;True;True;True;True;True;True;True;True;True;True;True;True;True;True;True;True;True;True;True;True;True;True	128;163;185;230;231;241;242;252;312;313;314;322;324;325;421;443;444;445;474;488;489;536;537;576;577;646;707;708;709;710;895;1102;1103;1238;1369;1370;1371	231;232;312;363;364;365;442;443;444;460;461;462;463;464;477;478;479;587;588;589;590;591;592;593;594;595;596;597;611;614;615;616;617;618;619;798;799;835;836;837;838;839;840;841;885;886;887;910;911;912;913;914;1005;1006;1007;1008;1009;1086;1087;1088;1089;1090;1091;1092;1202;1295;1296;1297;1298;1299;1300;1301;1302;1303;1304;1677;1678;2068;2069;2070;2071;2072;2073;2335;2336;2669;2670;2671;2672;2673;2…	250;251;346;410;411;412;491;492;493;511;512;513;514;515;528;529;530;648;649;650;651;652;653;654;655;656;657;658;659;673;676;677;678;679;680;681;870;871;909;910;911;912;913;914;915;916;917;961;962;963;991;992;993;994;995;996;1096;1097;1098;1099;1100;1190;1191;1192;1193;1194;1195;1196;1307;1405;1406;1407;1408;1409;1410;1411;1412;1413;1414;1839;1840;2280;2281;2282;2283;2284;2285;2588;2589;3014;3015;…	250;346;411;492;493;512;514;530;648;650;659;673;677;680;871;911;915;917;961;991;996;1097;1099;1190;1194;1307;1405;1408;1412;1839;2282;2284;2588;3014;3018;3021	19	97
P15865	P15865	20	20	3	Histone H1.4	Hist1h1e	sp|P15865|H14_RAT Histone H1.4 OS=Rattus norvegicus OX=10116 GN=Hist1h1e PE=1 SV=3	1	20	20	3	17	18	17	18	2	2	39.7	39.7	9.6	21.987	219	219	0	323.31	39.7	39.3	1473700000	772710000	700950000	781450000	666170000	32	33	65				138	56;57;97;226;227;387;388;390;391;508;509;512;893;972;973;974;1016;1017;1054;1055	True;True;True;True;True;True;True;True;True;True;True;True;True;True;True;True;True;True;True;True	58;59;99;228;229;389;390;392;393;511;512;515;904;986;987;988;989;1035;1036;1074;1075	106;107;108;109;110;111;180;437;438;439;440;441;742;743;744;745;746;747;748;750;751;752;951;952;953;954;955;956;957;958;959;965;966;967;968;969;1694;1695;1696;1697;1698;1857;1858;1859;1860;1861;1862;1947;1948;1949;2019;2020;2021;2022;2023	113;114;115;116;117;118;119;194;195;486;487;488;489;490;809;810;811;812;813;814;815;817;818;819;820;1035;1036;1037;1038;1039;1040;1041;1042;1043;1049;1050;1051;1052;1053;1054;1055;1056;1057;1058;1856;1857;1858;1859;1860;1861;2051;2052;2053;2054;2055;2056;2152;2153;2154;2155;2156;2230;2231;2232;2233;2234	113;116;195;486;488;810;813;817;820;1035;1040;1052;1856;2051;2055;2056;2152;2154;2230;2233
Q6IMY8;A0A0G2JZ52	Q6IMY8;A0A0G2JZ52	56;55	56;55	56;55	Heterogeneous nuclear ribonucleoprotein U	Hnrnpu	sp|Q6IMY8|HNRPU_RAT Heterogeneous nuclear ribonucleoprotein U OS=Rattus norvegicus OX=10116 GN=Hnrnpu PE=1 SV=1;tr|A0A0G2JZ52|A0A0G2JZ52_RAT Heterogeneous nuclear ribonucleoprotein U OS=Rattus norvegicus OX=10116 GN=Hnrnpu PE=1 SV=1	2	56	56	56	34	53	34	53	34	53	43.4	43.4	43.4	87.731	798	798;803	0	323.31	36	39.7	1359000000	203820000	1155100000	294230000	1015800000	40	84	124				185	23;86;114;115;140;145;165;187;192;193;208;209;264;265;360;361;364;374;375;397;401;402;415;483;507;515;516;517;541;542;552;557;622;627;628;644;648;656;694;695;733;734;763;764;771;802;857;858;897;903;904;1096;1202;1291;1294;1363	True;True;True;True;True;True;True;True;True;True;True;True;True;True;True;True;True;True;True;True;True;True;True;True;True;True;True;True;True;True;True;True;True;True;True;True;True;True;True;True;True;True;True;True;True;True;True;True;True;True;True;True;True;True;True;True	23;88;116;117;142;147;167;189;194;195;210;211;266;267;362;363;366;376;377;399;403;404;405;418;486;510;518;519;520;544;545;555;560;625;630;631;647;651;659;697;698;738;739;773;774;781;812;867;868;869;908;914;915;1117;1225;1316;1319;1388	40;41;42;163;204;205;206;207;208;209;210;274;285;286;316;370;371;377;378;379;380;381;382;404;405;406;407;408;506;507;692;693;694;697;698;715;716;717;763;764;765;772;773;774;775;776;792;793;794;908;945;946;947;948;949;950;975;976;977;978;1019;1020;1034;1048;1049;1050;1162;1163;1164;1171;1172;1173;1174;1175;1176;1203;1208;1209;1220;1221;1279;1280;1281;1282;1283;1353;1354;1355;1418;1419;1420;1421;14…	43;44;45;177;223;224;225;226;227;228;229;305;316;317;350;417;418;424;425;426;427;428;429;451;452;453;454;455;557;558;559;756;757;758;761;762;779;780;781;834;835;836;837;844;845;846;847;848;864;865;866;989;1029;1030;1031;1032;1033;1034;1066;1067;1068;1069;1110;1111;1126;1149;1150;1151;1267;1268;1269;1276;1277;1278;1279;1280;1281;1308;1313;1314;1325;1326;1389;1390;1391;1392;1393;1463;1464;1465;1533…	44;177;224;226;305;316;350;418;425;427;452;455;557;559;756;758;762;779;780;834;847;848;866;989;1033;1066;1067;1069;1110;1111;1126;1149;1267;1278;1280;1308;1314;1326;1390;1391;1463;1465;1535;1538;1551;1635;1744;1747;1872;1881;1882;2311;2535;2923;2928;3054	17;18	508;520
Q3ZAV2;P62961;D3ZEV0;D4A3P0	Q3ZAV2;P62961;D3ZEV0	24;24;13;6	13;13;10;0	13;13;10;0	Nuclease-sensitive element-binding protein 1	Ybx1	tr|Q3ZAV2|Q3ZAV2_RAT Nuclease-sensitive element-binding protein 1 OS=Rattus norvegicus OX=10116 GN=Ybx1 PE=1 SV=1;sp|P62961|YBOX1_RAT Nuclease-sensitive element-binding protein 1 OS=Rattus norvegicus OX=10116 GN=Ybx1 PE=2 SV=3;tr|D3ZEV0|D3ZEV0_RAT Nuclease	4	24	13	13	20	21	11	11	11	11	58.9	48.2	48.2	36.2	326	326;322;322;359	0	323.31	58.9	58.9	1176000000	715260000	460750000	809280000	276560000	57	37	94				158	3;194;195;279;300;301;758;759;772;773;774;881;914;917;1092;1093;1115;1117;1118;1268;1269;1320;1357;1358	True;False;False;True;True;True;False;False;False;False;False;True;True;True;True;True;False;True;True;False;False;True;False;True	3;196;197;281;302;303;768;769;782;783;784;892;925;926;929;1113;1114;1136;1138;1139;1293;1294;1345;1382;1383	6;7;8;9;383;384;385;386;387;529;530;562;563;564;565;566;567;568;1407;1408;1409;1410;1411;1412;1436;1437;1438;1439;1440;1441;1442;1443;1444;1663;1664;1665;1666;1667;1668;1669;1670;1671;1672;1673;1674;1729;1730;1731;1732;1733;1738;1739;1740;1741;1742;1743;2088;2089;2090;2135;2136;2137;2142;2143;2144;2145;2146;2147;2148;2536;2537;2538;2539;2540;2627;2696;2697;2698;2699	6;7;8;9;10;11;12;430;431;432;433;434;581;582;583;584;620;621;622;623;624;625;626;627;628;1521;1522;1523;1524;1525;1526;1552;1553;1554;1555;1556;1557;1558;1559;1560;1803;1804;1805;1806;1807;1808;1809;1810;1811;1812;1813;1814;1815;1816;1817;1818;1819;1820;1821;1822;1823;1824;1825;1826;1827;1828;1829;1830;1831;1832;1833;1834;1835;1836;1895;1896;1897;1898;1899;1900;1901;1906;1907;1908;1909;1910;1911;…	6;430;434;582;620;626;1523;1525;1552;1554;1557;1804;1897;1916;2300;2302;2354;2360;2367;2874;2875;2971;3042;3044	11	216
Q62764;F1MA18	Q62764;F1MA18	28;25	28;25	8;8	Y-box-binding protein 3	Ybx3	sp|Q62764|YBOX3_RAT Y-box-binding protein 3 OS=Rattus norvegicus OX=10116 GN=Ybx3 PE=1 SV=1;tr|F1MA18|F1MA18_RAT Y-box-binding protein 3 OS=Rattus norvegicus OX=10116 GN=Ybx3 PE=1 SV=1	2	28	28	8	26	20	26	20	8	2	72.6	72.6	24.4	38.851	361	361;361	0	323.31	72.6	58.4	1094200000	694820000	399400000	718270000	359230000	40	29	69				175	35;194;195;278;299;739;758;759;772;773;774;819;879;880;888;913;958;1062;1063;1064;1115;1116;1235;1257;1258;1268;1269;1357	True;True;True;True;True;True;True;True;True;True;True;True;True;True;True;True;True;True;True;True;True;True;True;True;True;True;True;True	35;196;197;280;301;746;768;769;782;783;784;829;890;891;899;924;970;1082;1083;1084;1136;1137;1259;1282;1283;1293;1294;1382	62;63;383;384;385;386;387;528;560;561;1366;1367;1368;1369;1407;1408;1409;1410;1411;1412;1436;1437;1438;1439;1440;1441;1442;1443;1444;1530;1659;1660;1661;1662;1688;1728;1827;1828;2034;2035;2036;2037;2038;2039;2040;2135;2136;2137;2138;2139;2140;2141;2413;2508;2509;2510;2511;2512;2536;2537;2538;2539;2540;2696;2697	65;66;67;430;431;432;433;434;580;617;618;619;1478;1479;1480;1481;1521;1522;1523;1524;1525;1526;1552;1553;1554;1555;1556;1557;1558;1559;1560;1663;1799;1800;1801;1802;1850;1894;2017;2018;2245;2246;2247;2248;2249;2250;2251;2352;2353;2354;2355;2356;2357;2358;2359;2707;2837;2838;2839;2840;2841;2869;2870;2871;2872;2873;2874;2875;3042;3043	66;430;434;580;618;1479;1523;1525;1552;1554;1557;1663;1799;1800;1850;1894;2017;2246;2247;2251;2354;2358;2707;2837;2841;2874;2875;3042
Q9QX80;Q9QX81	Q9QX80;Q9QX81	34;34	34;34	33;33	CArG-binding factor A	Hnrnpab	tr|Q9QX80|Q9QX80_RAT CArG-binding factor A OS=Rattus norvegicus OX=10116 GN=Hnrnpab PE=1 SV=1;tr|Q9QX81|Q9QX81_RAT Heterogeneous nuclear ribonucleoprotein A/B OS=Rattus norvegicus OX=10116 GN=Hnrnpab PE=1 SV=1	2	34	34	33	31	24	31	24	30	23	60	60	60	30.853	285	285;332	0	323.31	60	53.3	1051900000	866630000	185260000	888130000	157360000	46	28	74				197	162;163;174;175;184;185;236;237;252;253;262;263;316;317;318;337;338;439;487;518;521;532;595;707;708;709;760;887;1079;1080;1215;1216;1249;1262	True;True;True;True;True;True;True;True;True;True;True;True;True;True;True;True;True;True;True;True;True;True;True;True;True;True;True;True;True;True;True;True;True;True	164;165;176;177;186;187;238;239;254;255;264;265;318;319;320;339;340;442;490;521;524;535;598;711;712;713;770;898;1099;1100;1239;1240;1273;1287	313;314;348;349;350;351;366;367;368;455;456;457;458;481;482;483;484;501;502;503;504;505;602;603;604;605;606;607;608;647;648;649;650;651;652;833;834;915;916;979;982;983;1003;1004;1123;1305;1306;1307;1308;1309;1310;1311;1312;1313;1413;1685;1686;1687;2058;2059;2060;2061;2062;2063;2064;2337;2338;2339;2340;2341;2490;2518;2519;2520	347;348;394;395;396;397;413;414;415;506;507;508;509;532;533;534;535;552;553;554;555;556;664;665;666;667;668;669;670;709;710;711;712;713;714;906;907;908;997;998;1070;1073;1074;1094;1095;1227;1415;1416;1417;1418;1419;1420;1421;1422;1423;1527;1847;1848;1849;2269;2270;2271;2272;2273;2274;2275;2276;2590;2591;2592;2593;2594;2813;2847;2848;2849	347;348;394;396;413;415;507;509;533;535;553;556;664;667;669;710;712;907;997;1070;1074;1094;1227;1415;1418;1421;1527;1847;2270;2272;2590;2593;2813;2848
Q91ZW1	Q91ZW1	34	34	34	Transcription factor A, mitochondrial	Tfam	sp|Q91ZW1|TFAM_RAT Transcription factor A, mitochondrial OS=Rattus norvegicus OX=10116 GN=Tfam PE=2 SV=1	1	34	34	34	24	34	24	34	24	34	68.4	68.4	68.4	28.186	244	244	0	323.31	65.2	68.4	899560000	398480000	501080000	398460000	483790000	33	43	76				192	54;142;189;213;214;223;224;285;286;422;489;570;620;621;672;673;789;790;827;828;829;942;943;944;1119;1123;1124;1125;1290;1309;1327;1328;1352;1353	True;True;True;True;True;True;True;True;True;True;True;True;True;True;True;True;True;True;True;True;True;True;True;True;True;True;True;True;True;True;True;True;True;True	56;144;191;215;216;225;226;287;288;425;492;573;623;624;675;676;799;800;837;838;839;954;955;956;1140;1144;1145;1146;1315;1334;1352;1353;1377;1378	101;102;277;278;373;416;417;418;431;432;433;434;538;539;540;541;804;805;919;920;1082;1083;1157;1158;1159;1160;1161;1247;1248;1249;1250;1480;1481;1482;1483;1484;1485;1486;1544;1545;1546;1547;1548;1549;1550;1793;1794;1795;1796;1797;1798;1799;1800;1801;2149;2150;2151;2163;2164;2165;2166;2167;2168;2577;2613;2637;2638;2639;2640;2685;2686;2687;2688;2689;2690	108;109;308;309;420;463;464;465;479;480;481;482;592;593;594;595;876;877;1001;1002;1186;1187;1262;1263;1264;1265;1266;1357;1358;1359;1360;1613;1614;1615;1616;1617;1618;1619;1677;1678;1679;1680;1681;1682;1683;1982;1983;1984;1985;1986;1987;1988;1989;1990;2369;2370;2371;2372;2394;2395;2396;2397;2398;2399;2920;2957;2981;2982;2983;2984;3030;3031;3032;3033;3034;3035;3036	108;308;420;463;465;480;482;592;594;877;1001;1186;1265;1266;1357;1359;1614;1618;1677;1679;1683;1982;1986;1988;2372;2394;2396;2399;2920;2957;2981;2983;3032;3036
A0A0H2UI11;P62893	A0A0H2UI11;P62893	2;2	2;2	2;2	60S ribosomal protein L39	Rpl39	tr|A0A0H2UI11|A0A0H2UI11_RAT 60S ribosomal protein L39 OS=Rattus norvegicus OX=10116 GN=Rpl39 PE=1 SV=1;sp|P62893|RL39_RAT 60S ribosomal protein L39 OS=Rattus norvegicus OX=10116 GN=Rpl39 PE=1 SV=2	2	2	2	2	2	1	2	1	2	1	24	24	24	6.2754	50	50;51	0	49.201	24	20	838640000	622450000	216190000	597220000	233960000	4	1	5				45	846;862	True;True	856;873	1583;1584;1618;1619;1620	1717;1718;1754;1755;1756	1717;1754
P60825	P60825	14	14	14	Cold-inducible RNA-binding protein	Cirbp	sp|P60825|CIRBP_RAT Cold-inducible RNA-binding protein OS=Rattus norvegicus OX=10116 GN=Cirbp PE=2 SV=1	1	14	14	14	12	12	12	12	12	12	75	75	75	18.607	172	172	0	264.42	59.3	69.8	688670000	450260000	238410000	427830000	252610000	18	14	32				148	96;176;325;326;399;843;1002;1071;1084;1085;1095;1340;1341;1342	True;True;True;True;True;True;True;True;True;True;True;True;True;True	98;178;327;328;401;853;1021;1091;1104;1105;1106;1116;1365;1366;1367	179;352;353;622;623;624;768;769;1578;1579;1918;1919;2049;2074;2075;2076;2077;2094;2095;2096;2657;2658;2659;2660;2661;2662;2663;2664	193;398;399;684;685;686;840;841;1712;1713;2116;2117;2118;2119;2260;2286;2287;2288;2289;2306;2307;2308;2309;3001;3002;3003;3004;3005;3006;3007;3008;3009	193;398;685;686;840;1712;2116;2260;2286;2289;2306;3001;3003;3009	7;8;9	64;65;67
P27008	P27008	48	48	48	Poly [ADP-ribose] polymerase 1	Parp1	sp|P27008|PARP1_RAT Poly [ADP-ribose] polymerase 1 OS=Rattus norvegicus OX=10116 GN=Parp1 PE=1 SV=4	1	48	48	48	22	44	22	44	22	44	49.8	49.8	49.8	112.66	1014	1014	0	323.31	26.3	46.4	495140000	91733000	403410000	130380000	350820000	25	53	78				144	12;20;74;75;76;90;91;98;123;138;199;200;238;295;296;303;333;334;335;339;358;426;470;523;524;543;601;641;661;669;683;687;690;726;803;806;895;946;1164;1182;1198;1230;1242;1243;1248;1301;1302;1303	True;True;True;True;True;True;True;True;True;True;True;True;True;True;True;True;True;True;True;True;True;True;True;True;True;True;True;True;True;True;True;True;True;True;True;True;True;True;True;True;True;True;True;True;True;True;True;True	12;20;76;77;78;92;93;100;125;140;201;202;240;297;298;305;335;336;337;341;360;429;473;526;527;546;604;644;664;672;686;690;693;730;813;816;906;958;1185;1204;1221;1254;1266;1267;1272;1326;1327;1328	25;26;37;145;146;147;169;170;171;172;173;181;182;227;269;393;394;459;556;557;572;573;574;641;642;643;644;645;653;654;655;689;690;813;883;884;985;986;987;988;1021;1133;1198;1199;1228;1242;1264;1269;1270;1273;1341;1342;1503;1504;1505;1506;1510;1702;1803;1804;2233;2234;2266;2296;2405;2477;2478;2479;2480;2488;2489;2595;2596;2597;2598;2599;2600;2601;2602	28;29;40;157;158;159;183;184;185;186;187;196;197;246;300;440;441;510;613;614;632;633;634;703;704;705;706;707;715;716;717;753;754;886;959;960;1076;1077;1078;1079;1112;1237;1303;1304;1333;1352;1374;1379;1380;1383;1451;1452;1636;1637;1638;1639;1643;1868;1992;1993;2465;2466;2499;2530;2699;2800;2801;2802;2803;2811;2812;2938;2939;2940;2941;2942;2943;2944;2945;2946	29;40;157;158;159;183;185;197;246;300;440;441;510;613;614;633;703;704;706;716;753;886;959;1076;1079;1112;1237;1303;1333;1352;1374;1379;1383;1452;1639;1643;1868;1993;2466;2499;2530;2699;2800;2802;2811;2940;2942;2945
D4A3K5	D4A3K5	15	11	11	Histone H1.1	Hist1h1a	sp|D4A3K5|H11_RAT Histone H1.1 OS=Rattus norvegicus OX=10116 GN=Hist1h1a PE=1 SV=1	1	15	11	11	14	12	10	9	10	9	43.9	38.8	38.8	22.004	214	214	0	213.08	43.5	43.5	365310000	173400000	191910000	179600000	179080000	14	13	27				93	226;227;384;385;535;563;564;980;981;1016;1017;1034;1035;1050;1051	False;False;True;True;True;True;True;True;True;False;False;True;True;True;True	228;229;386;387;538;566;567;999;1000;1035;1036;1054;1055;1070;1071	437;438;439;440;441;736;737;738;739;740;1010;1011;1012;1069;1070;1071;1072;1879;1880;1881;1882;1947;1948;1949;1983;1984;1985;1986;1987;2011;2012;2013;2014;2015;2016	486;487;488;489;490;803;804;805;806;807;1101;1102;1103;1173;1174;1175;1176;2074;2075;2076;2077;2152;2153;2154;2155;2156;2193;2194;2195;2196;2197;2222;2223;2224;2225;2226;2227	486;488;804;807;1101;1173;1175;2076;2077;2152;2154;2193;2195;2222;2227
Q8K585;D3ZAX1	Q8K585	6;1	6;1	1;0	High mobility group protein HMG-I/HMG-Y	Hmga1	sp|Q8K585|HMGA1_RAT High mobility group protein HMG-I/HMG-Y OS=Rattus norvegicus OX=10116 GN=Hmga1 PE=1 SV=3	2	6	6	1	6	3	6	3	1	1	61.7	61.7	23.4	11.706	107	107;91	0	217.14	61.7	56.1	300000000	177810000	122180000	165840000	129340000	12	7	19				190	220;536;555;967;968;1103	True;True;True;True;True;True	222;539;558;979;980;1124	428;1013;1014;1042;1043;1044;1045;1046;1844;1845;2113;2114;2115	476;1104;1105;1137;1138;1139;1140;1141;1142;1143;1144;1145;1146;1147;2034;2035;2330;2331;2332	476;1105;1144;2034;2035;2332
D4A543;B7SZV3;Q9ERV8;P36394	D4A543	16;6;1;1	16;6;1;1	16;6;1;1	RCG41622	Sox2	tr|D4A543|D4A543_RAT RCG41622 OS=Rattus norvegicus OX=10116 GN=Sox2 PE=4 SV=1	4	16	16	16	14	14	14	14	14	14	44.2	44.2	44.2	34.406	319	319;240;169;121	0	236.26	43.9	42.6	294620000	155190000	139430000	136290000	148810000	22	20	42				95	60;154;540;604;638;654;691;692;717;752;753;900;909;910;911;1255	True;True;True;True;True;True;True;True;True;True;True;True;True;True;True;True	62;156;543;607;641;657;694;695;721;760;761;762;911;920;921;922;1279;1280	117;118;119;300;301;302;303;1018;1136;1137;1189;1190;1191;1192;1216;1217;1218;1274;1275;1276;1277;1324;1325;1391;1392;1393;1394;1395;1396;1710;1711;1722;1723;1724;1725;1726;2502;2503;2504;2505	125;126;127;332;333;334;335;336;1109;1240;1241;1294;1295;1296;1297;1321;1322;1323;1384;1385;1386;1387;1434;1435;1503;1504;1505;1506;1507;1508;1509;1876;1877;1888;1889;1890;1891;1892;2831;2832;2833;2834	125;332;1109;1240;1297;1322;1384;1385;1435;1504;1509;1876;1888;1890;1892;2832	4;5	4;47
D3ZBN0	D3ZBN0	18	12	12	Histone H1.5	Hist1h1b	sp|D3ZBN0|H15_RAT Histone H1.5 OS=Rattus norvegicus OX=10116 GN=Hist1h1b PE=1 SV=1	1	18	12	12	15	18	10	12	10	12	38.7	27.5	27.5	22.649	222	222	0	123.13	38.7	38.7	270110000	166890000	103220000	156900000	108390000	19	22	41				70	58;59;106;225;351;352;387;388;390;391;510;511;513;894;978;979;1054;1055	True;True;True;True;True;True;False;False;False;False;True;True;True;True;True;True;False;False	60;61;108;227;353;354;389;390;392;393;513;514;516;905;995;996;997;998;1074;1075	112;113;114;115;116;193;194;435;436;674;675;676;742;743;744;745;746;747;748;750;751;752;960;961;962;963;964;970;971;972;973;1699;1700;1701;1871;1872;1873;1874;1875;1876;1877;1878;2019;2020;2021;2022;2023	120;121;122;123;124;209;210;211;212;213;483;484;485;736;737;738;739;809;810;811;812;813;814;815;817;818;819;820;1044;1045;1046;1047;1048;1059;1060;1061;1062;1063;1064;1862;1863;1864;1865;1866;1867;2066;2067;2068;2069;2070;2071;2072;2073;2230;2231;2232;2233;2234	120;122;210;485;736;737;810;813;817;820;1045;1048;1061;1866;2067;2072;2230;2233
A0A0G2KAZ7;Q3SWU3	A0A0G2KAZ7;Q3SWU3	24;17	21;14	21;14	Heterogeneous nuclear ribonucleoprotein D-like	Hnrnpdl	tr|A0A0G2KAZ7|A0A0G2KAZ7_RAT Heterogeneous nuclear ribonucleoprotein D-like OS=Rattus norvegicus OX=10116 GN=Hnrnpdl PE=1 SV=1;sp|Q3SWU3|HNRDL_RAT Heterogeneous nuclear ribonucleoprotein D-like OS=Rattus norvegicus OX=10116 GN=Hnrnpdl PE=1 SV=1	2	24	21	21	21	20	18	18	18	18	51.3	50.8	50.8	46.307	419	419;322	0	323.31	46.5	50.1	253760000	141480000	112280000	140720000	109160000	24	22	46				37	139;167;252;254;313;314;315;320;321;420;421;659;703;837;838;839;850;885;886;1082;1239;1264;1348;1349	True;True;False;True;True;True;True;False;True;True;True;True;True;True;True;True;True;True;True;False;True;True;True;True	141;169;254;256;315;316;317;322;323;423;424;662;706;847;848;849;860;896;897;1102;1263;1289;1373;1374	270;271;272;273;319;320;481;482;485;486;487;488;598;599;600;601;611;612;613;802;803;1225;1226;1293;1294;1564;1565;1566;1567;1568;1569;1570;1571;1595;1596;1679;1680;1681;1682;1683;1684;2068;2069;2070;2468;2469;2524;2525;2680;2681;2682	301;302;303;304;353;354;532;533;536;537;538;539;660;661;662;663;673;674;675;874;875;1330;1331;1403;1404;1698;1699;1700;1701;1702;1703;1704;1705;1729;1730;1731;1732;1841;1842;1843;1844;1845;1846;2280;2281;2282;2790;2791;2854;2855;3025;3026;3027	304;353;533;536;660;661;663;673;674;874;875;1330;1404;1698;1701;1702;1730;1841;1844;2282;2790;2854;3025;3026
Q5D059;P61980;M0R9K1	Q5D059;P61980;M0R9K1	18;18;15	18;18;15	18;18;15	Heterogeneous nuclear ribonucleoprotein K	Hnrnpk	tr|Q5D059|Q5D059_RAT Heterogeneous nuclear ribonucleoprotein K OS=Rattus norvegicus OX=10116 GN=Hnrnpk PE=1 SV=1;sp|P61980|HNRPK_RAT Heterogeneous nuclear ribonucleoprotein K OS=Rattus norvegicus OX=10116 GN=Hnrnpk PE=1 SV=1;tr|M0R9K1|M0R9K1_RAT Heterogene	3	18	18	18	10	17	10	17	10	17	38.8	38.8	38.8	51.028	464	464;463;463	0	267.46	22.8	38.4	227000000	26611000	200390000	39192000	135330000	13	49	62				151	69;155;156;182;340;382;383;452;453;456;602;630;785;786;787;805;906;1090	True;True;True;True;True;True;True;True;True;True;True;True;True;True;True;True;True;True	71;157;158;184;342;384;385;455;456;459;605;633;795;796;797;815;917;1111	137;138;304;305;306;307;361;362;656;657;658;731;732;733;734;735;858;859;863;1134;1178;1179;1460;1461;1462;1463;1464;1465;1466;1467;1468;1469;1470;1471;1472;1473;1474;1475;1476;1477;1509;1719;2084;2085	149;150;337;338;339;340;407;408;409;718;719;720;798;799;800;801;802;934;935;939;1238;1283;1284;1576;1577;1578;1579;1580;1581;1582;1583;1584;1585;1586;1587;1588;1589;1590;1591;1592;1593;1594;1595;1596;1597;1598;1599;1600;1601;1602;1603;1604;1605;1606;1607;1608;1609;1610;1642;1885;2296;2297	149;337;340;407;720;801;802;934;935;939;1238;1284;1580;1590;1600;1642;1885;2296
Q62806;A0A0G2K3M5	Q62806	27;2	27;2	27;2	Zinc finger protein 148	Znf148	sp|Q62806|ZN148_RAT Zinc finger protein 148 OS=Rattus norvegicus OX=10116 GN=Znf148 PE=1 SV=1	2	27	27	27	24	21	24	21	24	21	43.6	43.6	43.6	88.747	794	794;890	0	323.31	41.3	35.9	221940000	80308000	141630000	83490000	132770000	28	26	54				178	80;82;120;121;131;267;274;345;346;419;451;468;469;505;735;831;872;873;922;1023;1039;1040;1046;1151;1250;1323;1356	True;True;True;True;True;True;True;True;True;True;True;True;True;True;True;True;True;True;True;True;True;True;True;True;True;True;True	82;84;122;123;133;269;276;347;348;422;454;471;472;508;740;741;841;883;884;934;1042;1059;1060;1066;1172;1274;1348;1381	152;153;157;221;222;223;239;240;509;510;523;524;665;666;667;668;800;801;855;856;857;878;879;880;881;882;939;940;941;942;1356;1357;1358;1552;1639;1640;1641;1750;1751;1752;1753;1956;1957;1958;1992;1993;2005;2006;2210;2211;2212;2491;2631;2693;2694;2695	164;165;169;240;241;242;258;259;561;562;575;576;727;728;729;730;872;873;931;932;933;954;955;956;957;958;1023;1024;1025;1026;1466;1467;1468;1685;1775;1776;1777;1931;1932;1933;1934;2163;2164;2165;2202;2203;2216;2217;2442;2443;2444;2814;2975;3039;3040;3041	165;169;240;242;258;562;575;727;730;873;932;954;958;1025;1467;1685;1775;1777;1934;2163;2202;2203;2216;2443;2814;2975;3041	16	1
P62804;P62804-2	P62804	12;1	12;1	12;1	Histone H4	Hist1h4b	sp|P62804|H4_RAT Histone H4 OS=Rattus norvegicus OX=10116 GN=Hist1h4b PE=1 SV=2	2	12	12	12	11	10	11	10	11	10	68	68	68	11.367	103	103;19	0	207.02	61.2	58.3	191860000	103080000	88786000	89346000	96521000	17	13	30				155	168;169;490;491;567;898;1174;1205;1206;1233;1234;1274	True;True;True;True;True;True;True;True;True;True;True;True	170;171;493;494;570;909;1196;1228;1229;1230;1257;1258;1299	321;322;323;324;325;326;921;922;923;924;1077;1078;1079;1707;1708;2251;2304;2305;2306;2307;2308;2309;2310;2409;2410;2411;2412;2548;2549;2550	355;356;357;358;359;360;1003;1004;1005;1006;1007;1008;1181;1182;1183;1873;1874;2483;2538;2539;2540;2541;2542;2543;2544;2703;2704;2705;2706;2883;2884;2885	356;359;1003;1007;1183;1874;2483;2539;2543;2703;2705;2883	10	85
A0A0G2K747;G3V7K6;P28042	A0A0G2K747;G3V7K6;P28042	14;13;13	14;13;13	14;13;13	Single-stranded DNA binding protein 1, isoform CRA_b	Ssbp1	tr|A0A0G2K747|A0A0G2K747_RAT Single-stranded DNA binding protein 1, isoform CRA_b OS=Rattus norvegicus OX=10116 GN=Ssbp1 PE=1 SV=1;tr|G3V7K6|G3V7K6_RAT Single-stranded DNA-binding protein, mitochondrial OS=Rattus norvegicus OX=10116 GN=Ssbp1 PE=1 SV=2;sp|P	3	14	14	14	14	11	14	11	14	11	79.1	79.1	79.1	17.17	148	148;150;151	0	276.85	79.1	75.7	190610000	124200000	66410000	128770000	59548000	18	12	30				30	178;436;437;497;823;824;870;916;995;996;1044;1045;1229;1244	True;True;True;True;True;True;True;True;True;True;True;True;True;True	180;439;440;500;833;834;881;928;1014;1015;1064;1065;1253;1268	355;826;827;828;930;931;1536;1537;1538;1539;1540;1635;1636;1736;1737;1907;1908;1909;1910;1911;1912;2000;2001;2002;2003;2004;2404;2481;2482	401;899;900;901;1014;1015;1669;1670;1671;1672;1673;1771;1772;1904;1905;2104;2105;2106;2107;2108;2109;2110;2211;2212;2213;2214;2215;2698;2804;2805	401;899;901;1015;1671;1673;1772;1904;2104;2110;2213;2214;2698;2804
Q566D6;F1SW39;Q812D1-2;Q812D1;F1LPC7;A0A0G2JYC7;Q8VHK7;Q925G1-2;Q925G1	Q566D6;F1SW39;Q812D1-2;Q812D1	15;15;15;15;2;2;2;2;2	15;15;15;15;2;2;2;2;2	13;13;13;13;0;0;0;0;0	PC4 and SFRS1-interacting protein	Psip1	tr|Q566D6|Q566D6_RAT PC4 and SFRS1-interacting protein OS=Rattus norvegicus OX=10116 GN=Psip1 PE=1 SV=1;tr|F1SW39|F1SW39_RAT PC4 and SFRS1 interacting protein 1 OS=Rattus norvegicus OX=10116 GN=Psip1 PE=1 SV=1;sp|Q812D1-2|PSIP1_RAT Isoform 2 of PC4 and SFR	9	15	15	13	15	13	15	13	13	11	31.4	31.4	28.4	37.365	331	331;528;331;528;237;651;237;668;669	0	161.32	31.4	28.1	167120000	91565000	75557000	80602000	70132000	21	20	41				118	143;147;284;329;330;400;525;526;722;868;869;896;1187;1305;1306	True;True;True;True;True;True;True;True;True;True;True;True;True;True;True	145;149;286;331;332;402;528;529;726;879;880;907;1209;1210;1330;1331	279;280;281;282;288;536;537;633;634;635;636;637;770;771;989;990;991;992;993;994;1333;1334;1629;1630;1631;1632;1633;1634;1703;1704;2274;2275;2276;2277;2278;2279;2280;2281;2606;2607;2608;2609	310;311;312;313;319;590;591;695;696;697;698;699;842;843;1080;1081;1082;1083;1084;1085;1443;1444;1765;1766;1767;1768;1769;1770;1869;1870;2508;2509;2510;2511;2512;2513;2514;2515;2950;2951;2952;2953	311;319;590;697;699;842;1082;1085;1443;1766;1769;1870;2515;2950;2953
A0A0G2K654;P06349	A0A0G2K654	19;4	6;0	3;0	Histone cluster 1 H1 family member c	Hist1h1c	tr|A0A0G2K654|A0A0G2K654_RAT Histone cluster 1 H1 family member c OS=Rattus norvegicus OX=10116 GN=Hist1h1c PE=1 SV=1	2	19	6	3	17	18	5	6	3	3	41	21.2	9.9	21.316	212	212;208	0	83.101	38.7	41	160410000	100640000	59767000	98183000	55694000	10	11	21				26	56;57;97;226;227;354;355;387;388;508;509;512;893;969;970;971;1016;1017;1053	False;False;False;False;False;True;True;False;False;False;False;False;False;True;True;True;False;False;True	58;59;99;228;229;356;357;389;390;511;512;515;904;981;982;983;984;985;1035;1036;1073	106;107;108;109;110;111;180;437;438;439;440;441;682;683;684;685;686;742;743;744;745;746;747;748;951;952;953;954;955;956;957;958;959;965;966;967;968;969;1694;1695;1696;1697;1698;1846;1847;1848;1849;1850;1851;1852;1853;1854;1855;1856;1947;1948;1949;2018	113;114;115;116;117;118;119;194;195;486;487;488;489;490;746;747;748;749;750;809;810;811;812;813;814;815;1035;1036;1037;1038;1039;1040;1041;1042;1043;1049;1050;1051;1052;1053;1054;1055;1056;1057;1058;1856;1857;1858;1859;1860;1861;2036;2037;2038;2039;2040;2041;2042;2043;2044;2045;2046;2047;2048;2049;2050;2152;2153;2154;2155;2156;2229	113;116;195;486;488;748;750;810;813;1035;1040;1052;1856;2039;2044;2050;2152;2154;2229
A0A0G2K7B3;G3V9R8;A0A140TAI3;A0A0G2JXW4	A0A0G2K7B3;G3V9R8;A0A140TAI3;A0A0G2JXW4	19;19;18;18	19;19;18;18	19;19;18;18	Heterogeneous nuclear ribonucleoprotein C	LOC100911576	tr|A0A0G2K7B3|A0A0G2K7B3_RAT Heterogeneous nuclear ribonucleoprotein C OS=Rattus norvegicus OX=10116 GN=LOC100911576 PE=1 SV=1;sp|G3V9R8|HNRPC_RAT Heterogeneous nuclear ribonucleoprotein C OS=Rattus norvegicus OX=10116 GN=Hnrnpc PE=1 SV=2;tr|A0A140TAI3|A0A	4	19	19	19	9	19	9	19	9	19	54.3	54.3	54.3	33.056	300	300;298;293;313	0	209.39	24.7	54.3	158980000	26736000	132240000	35687000	116330000	13	28	41				31	101;186;308;501;562;718;719;754;822;847;848;932;956;957;962;1225;1226;1232;1281	True;True;True;True;True;True;True;True;True;True;True;True;True;True;True;True;True;True;True	103;188;310;504;565;722;723;763;764;832;857;858;944;968;969;974;1249;1250;1256;1306	186;369;583;584;935;1068;1326;1327;1328;1329;1397;1398;1399;1535;1585;1586;1587;1588;1589;1590;1591;1592;1769;1825;1826;1838;2397;2398;2399;2407;2408;2561;2562;2563;2564	201;416;644;645;1019;1172;1436;1437;1438;1439;1510;1511;1512;1513;1668;1719;1720;1721;1722;1723;1724;1725;1726;1953;2015;2016;2028;2691;2692;2693;2701;2702;2896;2897;2898;2899;2900;2901;2902;2903;2904;2905;2906	201;416;645;1019;1172;1437;1439;1512;1668;1720;1725;1953;2015;2016;2028;2692;2693;2701;2897	0	123
Q9WUL0;A0A0G2K3V7	Q9WUL0;A0A0G2K3V7	32;31	32;31	32;31	DNA topoisomerase 1	Top1	sp|Q9WUL0|TOP1_RAT DNA topoisomerase 1 OS=Rattus norvegicus OX=10116 GN=Top1 PE=1 SV=1;tr|A0A0G2K3V7|A0A0G2K3V7_RAT DNA topoisomerase 1 OS=Rattus norvegicus OX=10116 GN=Top1 PE=1 SV=1	2	32	32	32	10	30	10	30	10	30	32.5	32.5	32.5	90.759	767	767;748	0	283.99	17.2	30.4	140800000	27869000	112930000	32262000	104640000	10	37	47				200	83;109;124;181;215;218;219;241;269;270;378;425;472;473;474;499;500;571;631;660;724;725;890;994;1057;1058;1209;1237;1279;1316;1377;1378	True;True;True;True;True;True;True;True;True;True;True;True;True;True;True;True;True;True;True;True;True;True;True;True;True;True;True;True;True;True;True;True	85;111;126;183;217;220;221;243;271;272;380;428;475;476;477;502;503;574;634;663;728;729;901;1013;1077;1078;1233;1261;1304;1341;1403;1404	158;198;228;229;359;360;419;420;424;425;426;427;465;515;516;517;518;722;810;811;812;888;889;890;891;933;934;1084;1180;1181;1227;1339;1340;1691;1906;2026;2027;2328;2329;2416;2557;2558;2621;2745;2746;2747	170;217;247;248;405;406;466;467;468;472;473;474;475;516;567;568;569;570;787;882;883;884;885;964;965;966;967;968;969;1017;1018;1188;1285;1286;1332;1449;1450;1853;2103;2237;2238;2581;2582;2710;2711;2892;2893;2965;3093;3094;3095	170;217;248;406;467;473;474;516;568;570;787;884;967;968;969;1017;1018;1188;1286;1332;1449;1450;1853;2103;2237;2238;2582;2710;2893;2965;3093;3094
D3ZG21	D3ZG21	37	37	36	Transcription factor 20	Tcf20	tr|D3ZG21|D3ZG21_RAT Transcription factor 20 OS=Rattus norvegicus OX=10116 GN=Tcf20 PE=1 SV=1	1	37	37	36	27	27	27	27	26	26	25.5	25.5	25	214.32	1970	1970	0	323.31	21.4	20.5	137640000	69798000	67843000	74826000	60472000	32	32	64				73	44;45;135;166;230;365;372;520;556;629;645;650;684;811;812;815;816;825;826;840;844;859;860;864;920;937;939;985;1007;1008;1026;1068;1086;1160;1161;1325;1371	True;True;True;True;True;True;True;True;True;True;True;True;True;True;True;True;True;True;True;True;True;True;True;True;True;True;True;True;True;True;True;True;True;True;True;True;True	45;46;137;168;232;367;374;523;559;632;648;653;687;821;822;825;826;835;836;850;854;870;871;875;932;949;951;1004;1026;1027;1045;1088;1107;1181;1182;1350;1397	81;82;83;84;85;264;265;317;318;445;699;700;701;702;713;981;1047;1177;1204;1211;1265;1266;1516;1517;1521;1522;1523;1524;1525;1541;1542;1543;1572;1573;1580;1612;1613;1614;1615;1622;1623;1747;1782;1783;1784;1785;1788;1789;1790;1888;1889;1890;1926;1927;1928;1961;2045;2046;2078;2079;2228;2229;2634;2733;2734	88;89;90;91;92;294;295;296;351;352;494;763;764;765;766;777;1072;1148;1282;1309;1316;1375;1376;1649;1650;1654;1655;1656;1657;1658;1674;1675;1676;1706;1707;1714;1748;1749;1750;1751;1758;1759;1928;1968;1969;1970;1971;1977;1978;1979;2085;2086;2087;2126;2127;2128;2168;2256;2257;2290;2291;2460;2461;2978;3081;3082	88;89;294;351;494;764;777;1072;1148;1282;1309;1316;1376;1649;1650;1655;1658;1674;1676;1706;1714;1748;1750;1758;1928;1970;1979;2086;2127;2128;2168;2257;2290;2460;2461;2978;3081
P83732;A0A0H2UH99;M0RBD1	P83732;A0A0H2UH99	9;8;1	9;8;1	9;8;1	60S ribosomal protein L24	Rpl24	sp|P83732|RL24_RAT 60S ribosomal protein L24 OS=Rattus norvegicus OX=10116 GN=Rpl24 PE=2 SV=1;tr|A0A0H2UH99|A0A0H2UH99_RAT 60S ribosomal protein L24 OS=Rattus norvegicus OX=10116 GN=Rpl24 PE=1 SV=1	3	9	9	9	8	9	8	9	8	9	45.2	45.2	45.2	17.779	157	157;156;158	0	100.26	38.2	45.2	135440000	77143000	58295000	68347000	64329000	10	11	21				163	52;53;127;502;723;841;842;1135;1236	True;True;True;True;True;True;True;True;True	53;54;55;129;505;727;851;852;1156;1260	94;95;96;97;98;99;100;233;234;936;1335;1336;1337;1338;1574;1575;1576;1577;2181;2182;2183;2184;2414;2415	101;102;103;104;105;106;107;252;253;1020;1445;1446;1447;1448;1708;1709;1710;1711;2412;2413;2414;2415;2708;2709	102;104;253;1020;1447;1709;1711;2414;2709	12	91
D4ABT8	D4ABT8	24	24	24	Heterogeneous nuclear ribonucleoprotein U-like 2	Hnrnpul2	tr|D4ABT8|D4ABT8_RAT Heterogeneous nuclear ribonucleoprotein U-like 2 OS=Rattus norvegicus OX=10116 GN=Hnrnpul2 PE=1 SV=1	1	24	24	24	6	24	6	24	6	24	35.3	35.3	35.3	84.858	745	745	0	275.72	12.6	35.3	125630000	11123000	114510000	18695000	102980000	7	29	36				101	67;81;119;164;297;298;366;569;623;649;674;761;762;768;821;902;930;1078;1134;1295;1300;1308;1336;1364	True;True;True;True;True;True;True;True;True;True;True;True;True;True;True;True;True;True;True;True;True;True;True;True	69;83;121;166;299;300;368;572;626;652;677;771;772;778;831;913;942;1098;1155;1320;1325;1333;1361;1389;1390	134;135;154;155;156;217;218;219;220;315;558;559;703;1081;1165;1166;1210;1251;1414;1415;1416;1417;1430;1431;1533;1534;1714;1767;2057;2180;2586;2594;2612;2652;2709;2710;2711	146;147;166;167;168;236;237;238;239;349;615;616;767;1185;1270;1271;1315;1361;1528;1529;1530;1531;1532;1546;1547;1666;1667;1880;1951;2268;2411;2929;2937;2956;2996;3055;3056;3057	147;167;239;349;615;616;767;1185;1271;1315;1361;1530;1532;1546;1666;1880;1951;2268;2411;2929;2937;2956;2996;3057	6	491
M0RBX6;D3ZK97;D3ZJ08;Q6LED0;P84245;A0A0G2K0N8;A0A0G2K5X7;A0A0G2K9I5;D3ZCY4	M0RBX6;D3ZK97;D3ZJ08;Q6LED0;P84245;A0A0G2K0N8	10;10;10;10;10;8;2;2;1	10;10;10;10;10;8;2;2;1	10;10;10;10;10;8;2;2;1	Histone H3	LOC690171	tr|M0RBX6|M0RBX6_RAT Histone H3 OS=Rattus norvegicus OX=10116 GN=LOC690171 PE=1 SV=1;tr|D3ZK97|D3ZK97_RAT Histone H3 OS=Rattus norvegicus OX=10116 GN=H3f3c PE=3 SV=1;tr|D3ZJ08|D3ZJ08_RAT Histone H3 OS=Rattus norvegicus OX=10116 GN=Hist2h3c2 PE=1 SV=1;sp|Q6	9	10	10	10	9	7	9	7	9	7	38.2	38.2	38.2	15.37	136	136;136;136;136;136;130;136;136;133	0	70.311	38.2	29.4	124180000	55285000	68898000	66103000	55701000	11	8	19				75	151;204;675;927;928;931;1107;1296;1367;1368	True;True;True;True;True;True;True;True;True;True	153;206;678;939;940;943;1128;1321;1393;1394	294;295;398;399;400;1252;1253;1762;1763;1764;1765;1768;2120;2587;2588;2589;2725;2726;2727;2728;2729	325;326;445;446;447;1362;1363;1946;1947;1948;1949;1952;2337;2930;2931;2932;3073;3074;3075;3076;3077	326;446;1363;1946;1948;1952;2337;2930;3073;3077
F1MAQ5;A0A0U1RRX4;P15146-2;F1LNK0;P15146;P15146-3;Q78DZ1;P15146-4;A0A0U1RRQ0	F1MAQ5;A0A0U1RRX4;P15146-2;F1LNK0;P15146;P15146-3;Q78DZ1;P15146-4;A0A0U1RRQ0	25;25;25;24;24;21;20;20;14	25;25;25;24;24;21;20;20;14	25;25;25;24;24;21;20;20;14	Microtubule-associated protein	Map2	tr|F1MAQ5|F1MAQ5_RAT Microtubule-associated protein OS=Rattus norvegicus OX=10116 GN=Map2 PE=1 SV=3;tr|A0A0U1RRX4|A0A0U1RRX4_RAT Microtubule-associated protein OS=Rattus norvegicus OX=10116 GN=Map2 PE=1 SV=1;sp|P15146-2|MTAP2_RAT Isoform 2 of Microtubule-a	9	25	25	25	21	17	21	17	21	17	12.5	12.5	12.5	198.46	1825	1825;1829;1830;1942;1861;467;498;498;336	0	225.03	11.3	10	121530000	75639000	45889000	64126000	55818000	24	20	44				47	37;95;348;393;431;432;448;530;613;615;1003;1004;1015;1031;1101;1178;1179;1195;1196;1224;1245;1246;1247;1252;1372	True;True;True;True;True;True;True;True;True;True;True;True;True;True;True;True;True;True;True;True;True;True;True;True;True	37;97;350;395;434;435;451;533;616;618;1022;1023;1034;1051;1122;1200;1201;1218;1219;1248;1269;1270;1271;1276;1398	65;66;177;178;670;754;755;820;821;851;998;999;1000;1001;1149;1151;1920;1921;1922;1945;1946;1975;2108;2109;2259;2260;2261;2262;2263;2292;2293;2294;2395;2396;2483;2484;2485;2486;2487;2493;2494;2735	69;70;191;192;732;822;823;893;894;927;1089;1090;1091;1092;1253;1255;2120;2121;2122;2149;2150;2151;2183;2324;2325;2491;2492;2493;2494;2495;2496;2526;2527;2528;2689;2690;2806;2807;2808;2809;2810;2816;2817;3083	69;191;732;822;893;894;927;1092;1253;1255;2120;2122;2149;2183;2325;2492;2495;2527;2528;2689;2807;2808;2810;2817;3083
A0A0H2UHP0;Q9R1D1	A0A0H2UHP0;Q9R1D1	20;20	20;20	20;20	CCCTC-binding factor, isoform CRA_a	Ctcf	tr|A0A0H2UHP0|A0A0H2UHP0_RAT CCCTC-binding factor, isoform CRA_a OS=Rattus norvegicus OX=10116 GN=Ctcf PE=1 SV=1;sp|Q9R1D1|CTCF_RAT Transcriptional repressor CTCF OS=Rattus norvegicus OX=10116 GN=Ctcf PE=2 SV=1	2	20	20	20	15	18	15	18	15	18	27.2	27.2	27.2	84.008	738	738;737	0	152.42	20.3	27	113880000	55621000	58255000	55913000	55951000	20	22	42				41	30;137;259;268;561;716;775;845;852;853;929;952;1021;1022;1140;1150;1152;1324;1326;1343	True;True;True;True;True;True;True;True;True;True;True;True;True;True;True;True;True;True;True;True	30;139;261;270;564;720;785;855;862;863;941;964;1040;1041;1161;1171;1173;1349;1351;1368	54;267;268;494;495;496;497;511;512;513;514;1067;1323;1445;1581;1582;1598;1599;1600;1601;1766;1817;1953;1954;1955;2192;2193;2205;2206;2207;2208;2209;2213;2214;2632;2633;2635;2636;2665;2666;2667;2668	57;298;299;545;546;547;548;563;564;565;566;1171;1433;1561;1715;1716;1734;1735;1736;1737;1950;2007;2160;2161;2162;2423;2424;2436;2437;2438;2439;2440;2441;2445;2446;2976;2977;2979;2980;3010;3011;3012;3013	57;298;547;565;1171;1433;1561;1716;1734;1736;1950;2007;2160;2162;2423;2438;2445;2976;2980;3011
A0A0G2K0R4;A0A0G2KAJ3	A0A0G2K0R4;A0A0G2KAJ3	9;9	8;8	8;8	MYC-associated zinc finger protein	Maz	tr|A0A0G2K0R4|A0A0G2K0R4_RAT MYC-associated zinc finger protein OS=Rattus norvegicus OX=10116 GN=Maz PE=4 SV=1;tr|A0A0G2KAJ3|A0A0G2KAJ3_RAT MYC-associated zinc finger protein OS=Rattus norvegicus OX=10116 GN=Maz PE=4 SV=1	2	9	8	8	6	9	5	8	5	8	25.2	23	23	48.33	473	473;475	0	144.3	15.4	25.2	108220000	34950000	73273000	33244000	72448000	7	9	16				16	29;47;125;198;658;729;991;1019;1030	False;True;True;True;True;True;True;True;True	29;48;127;200;661;733;1010;1038;1050	51;52;53;87;230;391;392;1223;1224;1346;1347;1348;1897;1898;1899;1900;1951;1972;1973;1974	54;55;56;94;249;438;439;1328;1329;1456;1457;1458;2094;2095;2096;2097;2158;2180;2181;2182	56;94;249;438;1329;1457;2097;2158;2182
A0A0G2K7W6;P18445;D4AAY6;D3ZI60;D3ZG03;D3ZF07	A0A0G2K7W6;P18445;D4AAY6;D3ZI60;D3ZG03	7;7;4;4;4;2	7;7;4;4;4;2	7;7;4;4;4;2	Similar to 60S ribosomal protein L27a	RGD1562402	tr|A0A0G2K7W6|A0A0G2K7W6_RAT Similar to 60S ribosomal protein L27a OS=Rattus norvegicus OX=10116 GN=RGD1562402 PE=3 SV=1;sp|P18445|RL27A_RAT 60S ribosomal protein L27a OS=Rattus norvegicus OX=10116 GN=Rpl27a PE=1 SV=3;tr|D4AAY6|D4AAY6_RAT Similar to riboso	6	7	7	7	5	5	5	5	5	5	40.5	40.5	40.5	16.587	148	148;148;144;148;148;153	0	45.223	32.4	31.8	104620000	89939000	14682000	60210000	43904000	7	5	12				33	359;476;680;781;801;905;1347	True;True;True;True;True;True;True	361;479;683;791;811;916;1372	691;895;896;897;898;1260;1261;1454;1501;1718;2678;2679	755;973;974;975;976;1370;1371;1570;1634;1884;3023;3024	755;975;1370;1570;1634;1884;3024
F1M8R0	F1M8R0	11	11	10	Vascular endothelial zinc finger 1	Vezf1	tr|F1M8R0|F1M8R0_RAT Vascular endothelial zinc finger 1 OS=Rattus norvegicus OX=10116 GN=Vezf1 PE=1 SV=3	1	11	11	10	1	11	1	11	0	10	20.2	20.2	18.3	56.813	520	520	0	122.58	1.9	20.2	100210000	11437000	88774000	11437000	85708000	1	14	15				115	28;29;136;207;637;657;678;679;871;1020;1190	True;True;True;True;True;True;True;True;True;True;True	28;29;138;209;640;660;681;682;882;1039;1213	50;51;52;53;266;403;1188;1222;1257;1258;1259;1637;1638;1952;2285	53;54;55;56;297;450;1293;1327;1367;1368;1369;1773;1774;2159;2519	53;56;297;450;1293;1327;1367;1369;1773;2159;2519
D3ZRM9;P41123;A0A0G2JYG9;F1M2E9;D3ZD02	D3ZRM9;P41123;A0A0G2JYG9;F1M2E9;D3ZD02	10;10;8;8;6	10;10;8;8;6	10;10;8;8;6	60S ribosomal protein L13	LOC100360491	tr|D3ZRM9|D3ZRM9_RAT 60S ribosomal protein L13 OS=Rattus norvegicus OX=10116 GN=LOC100360491 PE=3 SV=1;sp|P41123|RL13_RAT 60S ribosomal protein L13 OS=Rattus norvegicus OX=10116 GN=Rpl13 PE=1 SV=2;tr|A0A0G2JYG9|A0A0G2JYG9_RAT 60S ribosomal protein L13 OS=R	5	10	10	10	9	8	9	8	9	8	45	45	45	24.202	211	211;211;202;210;210	0	65.52	41.7	37.4	82484000	35640000	46845000	49341000	31525000	9	9	18				79	41;51;331;332;427;590;782;1153;1227;1228	True;True;True;True;True;True;True;True;True;True	41;52;333;334;430;593;792;1174;1251;1252	73;92;93;638;639;640;814;815;816;1117;1455;1456;1457;2215;2216;2400;2401;2402;2403	79;99;100;700;701;702;887;888;889;1221;1571;1572;1573;2447;2448;2694;2695;2696;2697	79;100;701;702;887;1221;1572;2447;2694;2696
P62864;Q5BJN7	P62864;Q5BJN7	4;3	4;3	4;3	40S ribosomal protein S30	Fau	sp|P62864|RS30_RAT 40S ribosomal protein S30 OS=Rattus norvegicus OX=10116 GN=Fau PE=1 SV=1;tr|Q5BJN7|Q5BJN7_RAT 40S ribosomal protein S30 OS=Rattus norvegicus OX=10116 GN=LOC100360647 PE=1 SV=1	2	4	4	4	3	3	3	3	3	3	33.9	33.9	33.9	6.6478	59	59;133	0	42.934	20.3	32.2	80676000	46919000	33757000	42250000	37260000	5	4	9				157	289;290;568;882	True;True;True;True	291;292;571;893	544;545;546;547;548;549;1080;1675	598;599;600;601;602;603;604;1184;1837	598;604;1184;1837
D3ZJ19	D3ZJ19	11	11	8	DNA-binding protein SATB	Satb2	tr|D3ZJ19|D3ZJ19_RAT DNA-binding protein SATB OS=Rattus norvegicus OX=10116 GN=Satb2 PE=3 SV=1	1	11	11	8	11	3	11	3	8	3	19.5	19.5	15.6	82.586	733	733	0	97.778	19.5	8	75281000	67670000	7610500	64471000	8682700	15	5	20				76	78;625;740;876;1059;1060;1073;1132;1173;1217;1292	True;True;True;True;True;True;True;True;True;True;True	80;628;747;748;887;1079;1080;1093;1153;1195;1241;1317	150;1168;1169;1370;1371;1372;1373;1374;1375;1646;2028;2029;2030;2031;2032;2051;2177;2250;2342;2581	162;1273;1274;1482;1483;1484;1485;1486;1487;1782;2239;2240;2241;2242;2243;2262;2408;2482;2595;2924	162;1273;1484;1782;2239;2243;2262;2408;2482;2595;2924	3	568
D3Z937	D3Z937	11	11	11	High mobility group 20A	Hmg20a	tr|D3Z937|D3Z937_RAT High mobility group 20A OS=Rattus norvegicus OX=10116 GN=Hmg20a PE=1 SV=1	1	11	11	11	4	11	4	11	4	11	30	30	30	39.902	347	347	0	105.24	12.7	30	68402000	15030000	53372000	19447000	47111000	4	15	19				68	55;210;211;565;728;810;908;1114;1133;1136;1360	True;True;True;True;True;True;True;True;True;True;True	57;212;213;568;732;820;919;1135;1154;1157;1385	103;104;105;409;410;411;412;413;1073;1074;1345;1515;1721;2134;2178;2179;2185;2186;2702	110;111;112;456;457;458;459;460;1177;1178;1455;1648;1887;2351;2409;2410;2416;2417;3048	112;456;459;1178;1455;1648;1887;2351;2410;2416;3048
Q6URK4	Q6URK4	9	9	1	Heterogeneous nuclear ribonucleoprotein A3	Hnrnpa3	sp|Q6URK4|ROA3_RAT Heterogeneous nuclear ribonucleoprotein A3 OS=Rattus norvegicus OX=10116 GN=Hnrnpa3 PE=1 SV=1	1	9	9	1	5	9	5	9	0	1	35.9	35.9	4.2	39.652	379	379	0	131.63	27.2	35.9	61976000	20470000	41506000	27660000	32882000	7	12	19				186	309;327;435;438;702;1098;1337;1338;1350	True;True;True;True;True;True;True;True;True	311;329;438;441;705;1119;1362;1363;1375	585;586;625;626;627;628;629;825;829;830;831;832;1292;2103;2104;2653;2654;2655;2683	646;647;687;688;689;690;691;898;902;903;904;905;1402;2318;2319;2997;2998;2999;3028	647;690;898;905;1402;2318;2997;2999;3028
P62982;F1LU69;D4A0J6;F1M927;F1LML2;P62986;P0CG51;Q63429	P62982;F1LU69	8;7;3;2;2;2;2;2	8;7;3;2;2;2;2;2	8;7;3;2;2;2;2;2	Ubiquitin-40S ribosomal protein S27a	Rps27a	sp|P62982|RS27A_RAT Ubiquitin-40S ribosomal protein S27a OS=Rattus norvegicus OX=10116 GN=Rps27a PE=1 SV=2;tr|F1LU69|F1LU69_RAT Ubiquitin B pseudogene 4 OS=Rattus norvegicus OX=10116 GN=Ubbp4 PE=4 SV=3	8	8	8	8	7	7	7	7	7	7	48.1	48.1	48.1	17.951	156	156;150;165;154;810;128;305;810	0	84.968	48.1	46.2	60492000	29999000	30493000	33056000	26383000	7	10	17				159	122;190;191;591;655;1157;1158;1375	True;True;True;True;True;True;True;True	124;192;193;594;658;1178;1179;1401	224;225;226;374;375;376;1118;1119;1219;2223;2224;2225;2226;2738;2739;2740;2741	243;244;245;421;422;423;1222;1223;1324;2455;2456;2457;2458;3086;3087;3088;3089	243;421;422;1223;1324;2455;2458;3087
D3ZWX3;G3V9M5;Q9EQJ4-2;Q9EQJ4;G3V883;Q9EQJ4-3;Q9EQJ1	D3ZWX3;G3V9M5;Q9EQJ4-2;Q9EQJ4;G3V883;Q9EQJ4-3;Q9EQJ1	11;11;11;11;10;10;6	11;11;11;11;10;10;6	9;9;9;9;8;8;5	Zinc finger protein 384	Zfp384	tr|D3ZWX3|D3ZWX3_RAT Zinc finger protein 384 OS=Rattus norvegicus OX=10116 GN=Zfp384 PE=1 SV=1;tr|G3V9M5|G3V9M5_RAT Zinc finger protein 384 OS=Rattus norvegicus OX=10116 GN=Zfp384 PE=1 SV=1;sp|Q9EQJ4-2|ZN384_RAT Isoform 2 of Zinc finger protein 384 OS=Ratt	7	11	11	9	7	10	7	10	6	8	27.8	27.8	23.7	61.477	565	565;581;563;579;520;518;397	0	90.96	18.1	26.2	59403000	18953000	40450000	24499000	33507000	8	11	19				85	31;32;117;118;696;727;988;1138;1139;1218;1312	True;True;True;True;True;True;True;True;True;True;True	31;32;119;120;699;731;1007;1159;1160;1242;1337	55;56;57;58;213;214;215;216;1284;1285;1343;1344;1894;2188;2189;2190;2191;2343;2616	58;59;60;61;232;233;234;235;1394;1395;1453;1454;2091;2419;2420;2421;2422;2596;2960	60;61;233;234;1394;1454;2091;2420;2422;2596;2960
P15337-2;P15337;A0A0G2K748;D3ZXY8;A0A0G2JYV9;F7FD47;Q03061-1	P15337-2;P15337;A0A0G2K748;D3ZXY8;A0A0G2JYV9;F7FD47	8;8;5;5;5;4;2	8;8;5;5;5;4;2	8;8;5;5;5;4;2	Isoform 2 of Cyclic AMP-responsive element-binding protein 1	Creb1	sp|P15337-2|CREB1_RAT Isoform 2 of Cyclic AMP-responsive element-binding protein 1 OS=Rattus norvegicus OX=10116 GN=Creb1;sp|P15337|CREB1_RAT Cyclic AMP-responsive element-binding protein 1 OS=Rattus norvegicus OX=10116 GN=Creb1 PE=1 SV=1;tr|A0A0G2K748|A0A	7	8	8	8	6	6	6	6	6	6	22.9	22.9	22.9	35.081	327	327;341;102;113;357;268;357	0	74.274	21.4	19.6	58707000	34459000	24247000	30956000	26913000	6	5	11				137	63;134;463;1131;1165;1166;1221;1222	True;True;True;True;True;True;True;True	65;136;466;1152;1186;1187;1245;1246	130;263;872;873;2175;2176;2235;2236;2237;2390;2391;2392;2393	142;293;948;949;2406;2407;2467;2468;2469;2684;2685;2686;2687	142;293;949;2407;2467;2469;2684;2687
Q8K585-2	Q8K585-2	6	1	1	Isoform HMG-Y of High mobility group protein HMG-I/HMG-Y	Hmga1	sp|Q8K585-2|HMGA1_RAT Isoform HMG-Y of High mobility group protein HMG-I/HMG-Y OS=Rattus norvegicus OX=10116 GN=Hmga1	1	6	1	1	6	3	1	1	1	1	57.3	14.6	14.6	10.709	96	96	0	68.516	57.3	51	50673000	28955000	21718000	28921000	21002000	4	3	7				191	220;536;554;967;968;1103	False;False;True;False;False;False	222;539;557;979;980;1124	428;1013;1014;1037;1038;1039;1040;1041;1844;1845;2113;2114;2115	476;1104;1105;1130;1131;1132;1133;1134;1135;1136;2034;2035;2330;2331;2332	476;1105;1135;2034;2035;2332
Q7TQ84;F1M0P3;A0A0G2K6Q7;A0A0G2JSV9	Q7TQ84;F1M0P3	9;7;2;2	9;7;2;2	9;7;2;2	UAP56-interacting factor	Fyttd1	sp|Q7TQ84|UIF_RAT UAP56-interacting factor OS=Rattus norvegicus OX=10116 GN=Fyttd1 PE=2 SV=2;tr|F1M0P3|F1M0P3_RAT UAP56-interacting factor OS=Rattus norvegicus OX=10116 GN=Fyttd1 PE=1 SV=2	4	9	9	9	9	6	9	6	9	6	20.2	20.2	20.2	35.642	317	317;284;152;189	0	69.99	20.2	15.8	49624000	33985000	15639000	31409000	17675000	10	6	16				189	258;544;671;795;915;919;1192;1288;1317	True;True;True;True;True;True;True;True;True	260;547;674;805;927;931;1215;1313;1342	493;1022;1245;1246;1493;1734;1735;1745;1746;2288;2289;2573;2574;2575;2622;2623	544;1113;1355;1356;1626;1902;1903;1926;1927;2522;2523;2916;2917;2918;2966;2967	544;1113;1356;1626;1903;1926;2523;2916;2966
O88791	O88791	3	3	3	High mobility group AT-hook 2	Hmga2	tr|O88791|O88791_RAT High mobility group AT-hook 2 OS=Rattus norvegicus OX=10116 GN=Hmga2 PE=1 SV=1	1	3	3	3	3	3	3	3	3	3	36.4	36.4	36.4	11.676	107	107	0	125.87	36.4	36.4	48773000	24980000	23793000	25675000	22276000	5	6	11				134	305;553;938	True;True;True	307;556;950	576;577;1035;1036;1786;1787	636;637;638;1127;1128;1129;1972;1973;1974;1975;1976	638;1129;1972
A0A0G2JUX5;Q68A21	A0A0G2JUX5;Q68A21	13;12	13;12	6;5	Transcriptional activator protein Pur-beta	Purb	tr|A0A0G2JUX5|A0A0G2JUX5_RAT Transcriptional activator protein Pur-beta OS=Rattus norvegicus OX=10116 GN=Purb PE=1 SV=1;sp|Q68A21|PURB_RAT Transcriptional activator protein Pur-beta OS=Rattus norvegicus OX=10116 GN=Purb PE=1 SV=3	2	13	13	6	10	10	10	10	5	4	27.1	27.1	16.7	33.532	317	317;315	0	86.132	22.4	26.8	44059000	22635000	21423000	17587000	25732000	11	10	21				8	64;65;255;293;341;343;344;576;963;964;1321;1322;1376	True;True;True;True;True;True;True;True;True;True;True;True;True	66;67;257;295;343;345;346;579;975;976;1346;1347;1402	131;132;489;490;553;554;659;662;663;664;1094;1095;1839;1840;1841;2628;2629;2630;2742;2743;2744	143;144;540;541;610;611;721;724;725;726;1198;1199;2029;2030;2031;2972;2973;2974;3090;3091;3092	143;144;541;611;721;724;726;1199;2030;2031;2972;2973;3090
G3V6P6;Q5PPI5;Q925G0;Q925G0-2	G3V6P6	5;2;2;2	5;2;2;2	5;2;2;2	RNA binding motif protein 3, isoform CRA_a	Rbm3	tr|G3V6P6|G3V6P6_RAT RNA binding motif protein 3, isoform CRA_a OS=Rattus norvegicus OX=10116 GN=Rbm3 PE=1 SV=1	4	5	5	5	5	4	5	4	5	4	40.4	40.4	40.4	16.983	156	156;148;155;156	0	38.209	40.4	28.2	38978000	20249000	18729000	21288000	17043000	5	5	10				121	77;319;1072;1081;1332	True;True;True;True;True	79;321;1092;1101;1357	148;149;609;610;2050;2065;2066;2067;2645;2646	160;161;671;672;2261;2277;2278;2279;2989;2990	160;671;2261;2278;2989
F1LRL9;P15205;G3V7U2;A0A0G2K5C6;P34926	F1LRL9;P15205	14;14;1;1;1	14;14;1;1;1	14;14;1;1;1	Microtubule-associated protein 1B	Map1b	tr|F1LRL9|F1LRL9_RAT Microtubule-associated protein 1B OS=Rattus norvegicus OX=10116 GN=Map1b PE=1 SV=1;sp|P15205|MAP1B_RAT Microtubule-associated protein 1B OS=Rattus norvegicus OX=10116 GN=Map1b PE=1 SV=2	5	14	14	14	8	12	8	12	8	12	5.6	5.6	5.6	269.64	2461	2461;2459;2776;3014;2774	0	107.64	3.5	5.5	38531000	14186000	24345000	20871000	16819000	9	13	22				108	112;813;814;1066;1102;1104;1155;1156;1176;1177;1197;1199;1200;1201	True;True;True;True;True;True;True;True;True;True;True;True;True;True	114;823;824;1086;1123;1125;1176;1177;1198;1199;1220;1222;1223;1224	202;1518;1519;1520;2043;2110;2111;2112;2116;2219;2220;2221;2222;2255;2256;2257;2258;2295;2297;2298;2299	221;1651;1652;1653;2254;2326;2327;2328;2329;2333;2451;2452;2453;2454;2487;2488;2489;2490;2529;2531;2532;2533	221;1651;1653;2254;2329;2333;2451;2454;2488;2490;2529;2531;2532;2533
M0R469	M0R469	6	6	6	RCG24243	RGD1566359	tr|M0R469|M0R469_RAT RCG24243 OS=Rattus norvegicus OX=10116 GN=RGD1566359 PE=4 SV=1	1	6	6	6	4	6	4	6	4	6	52.4	52.4	52.4	20.08	189	189	0	46.927	33.3	52.4	36163000	9837600	26325000	13530000	21724000	5	8	13				124	4;7;9;580;830;1304	True;True;True;True;True;True	4;7;9;583;840;1329	10;11;15;16;18;19;20;21;1101;1551;2603;2604;2605	13;14;18;19;21;22;23;24;1205;1684;2947;2948;2949	14;19;22;1205;1684;2947
D3ZZZ0;A0A0G2K160	D3ZZZ0;A0A0G2K160	10;10	10;10	10;10	AT hook-containing transcription factor 1	Ahctf1	tr|D3ZZZ0|D3ZZZ0_RAT AT hook-containing transcription factor 1 OS=Rattus norvegicus OX=10116 GN=Ahctf1 PE=1 SV=1;tr|A0A0G2K160|A0A0G2K160_RAT AT hook-containing transcription factor 1 OS=Rattus norvegicus OX=10116 GN=Ahctf1 PE=1 SV=1	2	10	10	10	8	8	8	8	8	8	7.5	7.5	7.5	247.88	2240	2240;2312	0	107.28	5.6	5.8	34390000	19594000	14796000	15695000	18184000	10	9	19				17	71;159;217;291;617;793;817;874;1025;1028	True;True;True;True;True;True;True;True;True;True	73;161;219;293;620;803;827;885;1044;1048	141;142;310;422;423;550;551;1153;1489;1490;1526;1527;1642;1643;1960;1969;1970	153;154;343;470;471;605;606;607;608;1257;1622;1623;1659;1660;1778;1779;2167;2177;2178	153;343;471;608;1257;1622;1660;1779;2167;2178
Q76MX4-2;Q76MX4	Q76MX4-2;Q76MX4	7;6	7;6	7;6	Isoform 2 of Transcription factor MafG	Mafg	sp|Q76MX4-2|MAFG_RAT Isoform 2 of Transcription factor MafG OS=Rattus norvegicus OX=10116 GN=Mafg;sp|Q76MX4|MAFG_RAT Transcription factor MafG OS=Rattus norvegicus OX=10116 GN=Mafg PE=2 SV=2	2	7	7	7	6	6	6	6	6	6	58.6	58.6	58.6	17.876	162	162;189	0	57.855	48.8	45.7	31853000	16106000	15746000	15997000	15312000	8	8	16				188	367;368;588;1033;1069;1210;1254	True;True;True;True;True;True;True	369;370;591;1053;1089;1234;1278	704;705;706;707;708;709;1115;1980;1981;1982;2047;2330;2331;2499;2500;2501	768;769;770;771;772;773;1219;2190;2191;2192;2258;2583;2584;2828;2829;2830	771;773;1219;2192;2258;2584;2830
G3V9T6;A0A0G2K7P2	G3V9T6;A0A0G2K7P2	12;12	12;12	12;12	PHD finger protein 14	Phf14	tr|G3V9T6|G3V9T6_RAT PHD finger protein 14 OS=Rattus norvegicus OX=10116 GN=Phf14 PE=1 SV=1;tr|A0A0G2K7P2|A0A0G2K7P2_RAT PHD finger protein 14 OS=Rattus norvegicus OX=10116 GN=Phf14 PE=1 SV=1	2	12	12	12	5	12	5	12	5	12	16.9	16.9	16.9	99.071	880	880;928	0	94.258	8.3	16.9	31152000	6114700	25037000	10173000	20114000	6	12	18				32	408;506;546;611;646;720;820;993;1110;1111;1144;1193	True;True;True;True;True;True;True;True;True;True;True;True	411;509;549;614;649;724;830;1012;1131;1132;1165;1216	784;943;944;1024;1146;1205;1330;1331;1531;1532;1902;1903;1904;1905;2127;2128;2129;2199;2290	856;1027;1028;1115;1250;1310;1440;1441;1664;1665;2099;2100;2101;2102;2344;2345;2346;2430;2524	856;1028;1115;1250;1310;1440;1665;2099;2345;2346;2430;2524
M0R7B4	M0R7B4	19	3	3	RCG45259	Hist1h1d	tr|M0R7B4|M0R7B4_RAT RCG45259 OS=Rattus norvegicus OX=10116 GN=Hist1h1d PE=1 SV=2	1	19	3	3	16	18	2	3	2	3	39.5	9.5	9.5	22.233	220	220	0	35.604	36.8	39.5	29941000	16656000	13284000	23294000	5556000	4	5	9				125	56;57;97;226;227;354;355;387;388;508;509;512;893;975;976;977;1016;1017;1053	False;False;False;False;False;False;False;False;False;False;False;False;False;True;True;True;False;False;False	58;59;99;228;229;356;357;389;390;511;512;515;904;990;991;992;993;994;1035;1036;1073	106;107;108;109;110;111;180;437;438;439;440;441;682;683;684;685;686;742;743;744;745;746;747;748;951;952;953;954;955;956;957;958;959;965;966;967;968;969;1694;1695;1696;1697;1698;1863;1864;1865;1866;1867;1868;1869;1870;1947;1948;1949;2018	113;114;115;116;117;118;119;194;195;486;487;488;489;490;746;747;748;749;750;809;810;811;812;813;814;815;1035;1036;1037;1038;1039;1040;1041;1042;1043;1049;1050;1051;1052;1053;1054;1055;1056;1057;1058;1856;1857;1858;1859;1860;1861;2057;2058;2059;2060;2061;2062;2063;2064;2065;2152;2153;2154;2155;2156;2229	113;116;195;486;488;748;750;810;813;1035;1040;1052;1856;2060;2063;2065;2152;2154;2229
A0A096MKE9;Q5U2M4	A0A096MKE9;Q5U2M4	15;13	15;13	15;13	DNA ligase	Lig3	tr|A0A096MKE9|A0A096MKE9_RAT DNA ligase OS=Rattus norvegicus OX=10116 GN=Lig3 PE=1 SV=1;tr|Q5U2M4|Q5U2M4_RAT DNA ligase OS=Rattus norvegicus OX=10116 GN=Lig3 PE=1 SV=1	2	15	15	15	5	14	5	14	5	14	20.1	20.1	20.1	112.02	1002	1002;943	0	107.53	8.2	18.8	29618000	10443000	19175000	12902000	16054000	7	16	23				1	15;66;247;248;282;445;493;503;593;666;670;685;788;959;1212	True;True;True;True;True;True;True;True;True;True;True;True;True;True;True	15;68;249;250;284;448;496;506;596;669;673;688;798;971;1236	31;133;474;475;533;844;845;846;847;926;937;1121;1236;1243;1244;1267;1478;1479;1829;1830;1831;1832;2333	34;145;525;526;587;920;921;922;923;1010;1021;1225;1344;1353;1354;1377;1611;1612;2019;2020;2021;2022;2586	34;145;525;526;587;920;1010;1021;1225;1344;1353;1377;1611;2021;2586
Q4KMA2	Q4KMA2	4	4	4	UV excision repair protein RAD23 homolog B	Rad23b	sp|Q4KMA2|RD23B_RAT UV excision repair protein RAD23 homolog B OS=Rattus norvegicus OX=10116 GN=Rad23b PE=1 SV=1	1	4	4	4	3	3	3	3	3	3	10.8	10.8	10.8	43.496	415	415	0	31.677	9.2	10.8	28798000	15510000	13289000	16359000	11980000	4	3	7				169	465;466;766;1172	True;True;True;True	468;469;776;1194	875;876;1424;1425;1426;1427;2248;2249	951;952;1540;1541;1542;1543;2480;2481	951;952;1542;2481
P62275	P62275	2	2	2	40S ribosomal protein S29	Rps29	sp|P62275|RS29_RAT 40S ribosomal protein S29 OS=Rattus norvegicus OX=10116 GN=Rps29 PE=1 SV=2	1	2	2	2	1	2	1	2	1	2	33.9	33.9	33.9	6.6767	56	56	0	37.625	19.6	33.9	27784000	14758000	13026000	15620000	11714000	4	3	7				153	148;353	True;True	150;355	289;677;678;679;680;681	320;740;741;742;743;744;745	320;741
D3ZV90;D3ZCK7	D3ZV90	7;2	7;2	7;2	Empty spiracles homeobox 1	Emx1	tr|D3ZV90|D3ZV90_RAT Empty spiracles homeobox 1 OS=Rattus norvegicus OX=10116 GN=Emx1 PE=4 SV=2	2	7	7	7	6	4	6	4	6	4	20	20	20	31.648	290	290;253	0	45.041	19	14.1	26656000	12353000	14303000	12971000	13191000	6	4	10				82	24;428;551;778;849;1129;1130	True;True;True;True;True;True;True	24;431;554;788;859;1150;1151	43;44;817;1033;1449;1593;1594;2172;2173;2174	46;47;890;1125;1565;1727;1728;2403;2404;2405	46;890;1125;1565;1728;2404;2405
A0A0G2K3J3;Q63665-3;Q63665-2;Q63665	A0A0G2K3J3;Q63665-3;Q63665-2;Q63665	6;6;6;6	6;6;6;6	4;4;4;4	Upstream stimulatory factor 2	Usf2	tr|A0A0G2K3J3|A0A0G2K3J3_RAT Upstream stimulatory factor 2 OS=Rattus norvegicus OX=10116 GN=Usf2 PE=1 SV=1;sp|Q63665-3|USF2_RAT Isoform 3 of Upstream stimulatory factor 2 OS=Rattus norvegicus OX=10116 GN=Usf2;sp|Q63665-2|USF2_RAT Isoform 2 of Upstream stim	4	6	6	4	0	6	0	6	0	4	18.9	18.9	15.3	36.08	339	339;279;319;346	0	44.727	0	18.9	25875000	0	25875000	0	24981000	0	7	7				19	16;89;153;477;863;1148	True;True;True;True;True;True	16;91;155;480;874;1169	32;167;168;299;899;1621;2203	35;181;182;331;977;1757;2434	35;181;331;977;1757;2434
P61354;D3ZTK5;M0R7P0	P61354;D3ZTK5;M0R7P0	6;3;3	6;3;3	6;3;3	60S ribosomal protein L27	Rpl27	sp|P61354|RL27_RAT 60S ribosomal protein L27 OS=Rattus norvegicus OX=10116 GN=Rpl27 PE=2 SV=2;tr|D3ZTK5|D3ZTK5_RAT 60S ribosomal protein L27 OS=Rattus norvegicus OX=10116 GN=RGD1563835 PE=1 SV=1;tr|M0R7P0|M0R7P0_RAT 60S ribosomal protein L27-like OS=Rattus	3	6	6	6	5	3	5	3	5	3	43.4	43.4	43.4	15.798	136	136;135;136	0	40.207	43.4	20.6	24839000	17573000	7266100	13214000	11374000	6	3	9				150	779;783;1307;1310;1311;1370	True;True;True;True;True;True	789;793;1332;1335;1336;1396	1450;1451;1458;2610;2611;2614;2615;2731;2732	1566;1567;1574;2954;2955;2958;2959;3079;3080	1566;1574;2954;2958;2959;3079
P17078;D3ZN79;F1M6G3;D3ZB50	P17078;D3ZN79;F1M6G3	4;3;2;1	4;3;2;1	4;3;2;1	60S ribosomal protein L35	Rpl35	sp|P17078|RL35_RAT 60S ribosomal protein L35 OS=Rattus norvegicus OX=10116 GN=Rpl35 PE=1 SV=3;tr|D3ZN79|D3ZN79_RAT Similar to 60S ribosomal protein L35 OS=Rattus norvegicus OX=10116 GN=LOC686074 PE=3 SV=1;tr|F1M6G3|F1M6G3_RAT Uncharacterized protein OS=Rat	4	4	4	4	3	3	3	3	3	3	30.1	30.1	30.1	14.552	123	123;123;118;123	0	27.146	19.5	22.8	24383000	11652000	12731000	13794000	10150000	2	3	5				139	851;1276;1277;1355	True;True;True;True	861;1301;1302;1380	1597;2552;2553;2554;2555;2692	1733;2887;2888;2889;2890;3038	1733;2888;2889;3038
M0RDD7;Q498T2-2;Q498T2	M0RDD7;Q498T2-2;Q498T2	5;4;4	5;4;4	5;4;4	Chromatin target of PRMT1-like 1	Chtopl1	tr|M0RDD7|M0RDD7_RAT Chromatin target of PRMT1-like 1 OS=Rattus norvegicus OX=10116 GN=Chtopl1 PE=4 SV=1;sp|Q498T2-2|CHTOP_RAT Isoform 2 of Chromatin target of PRMT1 protein OS=Rattus norvegicus OX=10116 GN=Chtop;sp|Q498T2|CHTOP_RAT Chromatin target of PRM	3	5	5	5	4	3	4	3	4	3	22.2	22.2	22.2	22.136	203	203;202;248	0	35.021	21.2	15.3	23465000	14980000	8484700	14620000	8552300	4	3	7				130	100;222;586;587;899	True;True;True;True;True	102;224;589;590;910	184;185;430;1112;1113;1114;1709	199;200;478;1216;1217;1218;1875	199;478;1216;1218;1875
Q9R1S9	Q9R1S9	6	6	6	Midkine	Mdk	sp|Q9R1S9|MK_RAT Midkine OS=Rattus norvegicus OX=10116 GN=Mdk PE=2 SV=1	1	6	6	6	5	6	5	6	5	6	49.3	49.3	49.3	15.406	140	140	0	41.104	49.3	49.3	23449000	11446000	12004000	12251000	10784000	4	6	10				198	141;197;449;1354;1361;1362	True;True;True;True;True;True	143;199;452;1379;1386;1387	275;276;389;390;852;853;2691;2703;2704;2705;2706;2707	306;307;436;437;928;929;3037;3049;3050;3051;3052;3053	307;437;929;3037;3049;3052
A0A0H2UHU0;M0R763;P62853;F1M6F4;D4AE10;D3ZCH5	A0A0H2UHU0;M0R763;P62853;F1M6F4;D4AE10	4;4;4;3;2;1	4;4;4;3;2;1	4;4;4;3;2;1	40S ribosomal protein S25	Rps25	tr|A0A0H2UHU0|A0A0H2UHU0_RAT 40S ribosomal protein S25 OS=Rattus norvegicus OX=10116 GN=Rps25 PE=4 SV=1;tr|M0R763|M0R763_RAT 40S ribosomal protein S25-like OS=Rattus norvegicus OX=10116 GN=LOC100911337 PE=4 SV=1;sp|P62853|RS25_RAT 40S ribosomal protein S25	6	4	4	4	2	4	2	4	2	4	22.6	22.6	22.6	13.611	124	124;125;125;124;124;130	0	34.964	15.3	22.6	23363000	10084000	13280000	11493000	11412000	2	4	6				44	10;94;618;619	True;True;True;True	10;96;621;622	22;23;176;1154;1155;1156	25;26;190;1258;1259;1260;1261	25;190;1260;1261
Q63560-2;Q63560;F1LQZ9	Q63560-2;Q63560;F1LQZ9	10;10;9	10;10;9	10;10;9	Isoform 2 of Microtubule-associated protein 6	Map6	sp|Q63560-2|MAP6_RAT Isoform 2 of Microtubule-associated protein 6 OS=Rattus norvegicus OX=10116 GN=Map6;sp|Q63560|MAP6_RAT Microtubule-associated protein 6 OS=Rattus norvegicus OX=10116 GN=Map6 PE=1 SV=1;tr|F1LQZ9|F1LQZ9_RAT Microtubule-associated protein	3	10	10	10	8	6	8	6	8	6	29.1	29.1	29.1	70.622	660	660;952;952	0	72.261	27.6	15.6	21905000	15174000	6731400	12478000	9194200	8	6	14				181	40;105;108;116;292;883;892;983;984;1005	True;True;True;True;True;True;True;True;True;True	40;107;110;118;294;894;903;1002;1003;1024	71;72;192;196;197;211;212;552;1676;1693;1885;1886;1887;1923	77;78;208;215;216;230;231;609;1838;1855;2082;2083;2084;2123	77;208;216;231;609;1838;1855;2082;2083;2123
D4A3D8	D4A3D8	12	12	12	XPC complex subunit, DNA damage recognition and repair factor	Xpc	tr|D4A3D8|D4A3D8_RAT XPC complex subunit, DNA damage recognition and repair factor OS=Rattus norvegicus OX=10116 GN=Xpc PE=1 SV=1	1	12	12	12	4	12	4	12	4	12	19.4	19.4	19.4	104.86	933	933	0	90.879	7.1	19.4	21801000	5189600	16612000	5637600	15590000	3	9	12				91	6;280;410;411;462;608;941;1100;1186;1256;1319;1329	True;True;True;True;True;True;True;True;True;True;True;True	6;282;413;414;465;611;953;1121;1208;1281;1344;1354	13;14;531;786;787;871;1142;1792;2107;2272;2273;2506;2507;2625;2626;2641	16;17;585;858;859;947;1246;1981;2323;2506;2507;2835;2836;2969;2970;2985	17;585;858;859;947;1246;1981;2323;2507;2836;2970;2985
D4A3E3	D4A3E3	1	1	1	AT-rich interaction domain 1A	Arid1a	tr|D4A3E3|D4A3E3_RAT AT-rich interaction domain 1A OS=Rattus norvegicus OX=10116 GN=Arid1a PE=1 SV=3	1	1	1	1	1	1	1	1	1	1	0.3	0.3	0.3	217.58	2021	2021	0	6.5096	0.3	0.3	20420000	10613000	9807100	10613000	9468400	1	1	2				92	434	TRUE	437	823;824	896;897	896
A0JN25;D3ZKD9;D4A1Q2;F1LST4;P19332-7;P19332-6;P19332-3;P19332-5;P19332-4;P19332-2;P19332;P19332-8	A0JN25;D3ZKD9;D4A1Q2;F1LST4;P19332-7;P19332-6;P19332-3;P19332-5;P19332-4;P19332-2;P19332;P19332-8	9;7;7;7;7;7;7;7;7;7;7;7	9;7;7;7;7;7;7;7;7;7;7;7	9;7;7;7;7;7;7;7;7;7;7;7	Microtubule-associated protein	Mapt	tr|A0JN25|A0JN25_RAT Microtubule-associated protein OS=Rattus norvegicus OX=10116 GN=Mapt PE=1 SV=1;tr|D3ZKD9|D3ZKD9_RAT Microtubule-associated protein OS=Rattus norvegicus OX=10116 GN=Mapt PE=1 SV=2;tr|D4A1Q2|D4A1Q2_RAT Microtubule-associated protein OS=R	12	9	9	9	6	6	6	6	6	6	23.9	23.9	23.9	35.896	343	343;374;686;752;372;374;403;432;498;686;752;775	0	56.997	18.1	17.2	19990000	8884500	11105000	10250000	9356400	7	7	14				49	416;447;652;653;1018;1089;1091;1180;1282	True;True;True;True;True;True;True;True;True	419;450;655;656;1037;1110;1112;1202;1307	795;850;1213;1214;1215;1950;2082;2083;2086;2087;2264;2565;2566;2567	867;926;1318;1319;1320;2157;2294;2295;2298;2299;2497;2907;2908;2909	867;926;1319;1320;2157;2294;2299;2497;2909
F1LT35;D3ZTH8;P62752;D3ZNM1;D3ZTX9;D4AAL7;D3ZFK7;A0A0G2JU90;D3ZSR8	F1LT35;D3ZTH8;P62752;D3ZNM1;D3ZTX9;D4AAL7;D3ZFK7	6;6;6;3;3;3;3;2;1	6;6;6;3;3;3;3;2;1	6;6;6;3;3;3;3;2;1	Similar to 60S ribosomal protein L23a	RGD1564606	tr|F1LT35|F1LT35_RAT Similar to 60S ribosomal protein L23a OS=Rattus norvegicus OX=10116 GN=RGD1564606 PE=3 SV=1;tr|D3ZTH8|D3ZTH8_RAT Similar to 60S ribosomal protein L23a OS=Rattus norvegicus OX=10116 GN=LOC689899 PE=3 SV=1;sp|P62752|RL23A_RAT 60S ribosom	9	6	6	6	6	3	6	3	6	3	36.5	36.5	36.5	17.734	156	156;156;156;155;158;158;158;193;154	0	50.436	36.5	23.7	19630000	13836000	5793700	11397000	8033400	7	3	10				80	539;584;585;681;682;780	True;True;True;True;True;True	542;587;588;684;685;790	1017;1107;1108;1109;1110;1111;1262;1263;1452;1453	1108;1211;1212;1213;1214;1215;1372;1373;1568;1569	1108;1211;1213;1372;1373;1569
D4A7Z2;P61928;D3ZTX8;D3ZTT9;D4A201	D4A7Z2;P61928;D3ZTX8;D3ZTT9	5;5;4;3;2	5;5;4;3;2	5;5;4;3;2	Ribosomal protein L37	LOC100360654	tr|D4A7Z2|D4A7Z2_RAT Ribosomal protein L37 OS=Rattus norvegicus OX=10116 GN=LOC100360654 PE=3 SV=2;sp|P61928|RL37_RAT 60S ribosomal protein L37 OS=Rattus norvegicus OX=10116 GN=Rpl37 PE=1 SV=2;tr|D3ZTX8|D3ZTX8_RAT Similar to ribosomal protein L37 OS=Rattus	5	5	5	5	3	3	3	3	3	3	37.1	37.1	37.1	11.115	97	97;97;97;97;93	0	29.389	15.5	29.9	18504000	9505900	8998200	10603000	7590200	2	3	5				98	406;412;413;575;1159	True;True;True;True;True	409;415;416;578;1180	780;788;789;790;1093;2227	852;860;861;862;1197;2459	852;860;862;1197;2459
F1LV13;F1M3D3;Q62826;Q62826-2	F1LV13;F1M3D3;Q62826;Q62826-2	8;8;8;7	8;8;8;7	8;8;8;7	Heterogeneous nuclear ribonucleoprotein M	Hnrnpm	tr|F1LV13|F1LV13_RAT Heterogeneous nuclear ribonucleoprotein M OS=Rattus norvegicus OX=10116 GN=Hnrnpm PE=1 SV=1;tr|F1M3D3|F1M3D3_RAT Heterogeneous nuclear ribonucleoprotein M OS=Rattus norvegicus OX=10116 GN=Hnrnpm PE=1 SV=1;sp|Q62826|HNRPM_RAT Heterogene	4	8	8	8	5	6	5	6	5	6	18.7	18.7	18.7	73.721	690	690;729;690;535	0	75.686	11.2	14.2	18415000	11153000	7262200	11308000	6856600	6	4	10				109	8;373;475;688;710;711;712;713	True;True;True;True;True;True;True;True	8;375;478;691;714;715;716;717	17;714;892;893;894;1271;1314;1315;1316;1317;1318;1319;1320	20;778;970;971;972;1381;1424;1425;1426;1427;1428;1429;1430	20;778;970;1381;1425;1428;1429;1430
F1LYI5;A0A0G2QC62;P25886;D4A883;D4A888;M0R665;A0A0G2JT96	F1LYI5;A0A0G2QC62;P25886;D4A883;D4A888;M0R665;A0A0G2JT96	2;2;2;1;1;1;1	2;2;2;1;1;1;1	2;2;2;1;1;1;1	60S ribosomal protein L29	RGD1564138	tr|F1LYI5|F1LYI5_RAT 60S ribosomal protein L29 OS=Rattus norvegicus OX=10116 GN=RGD1564138 PE=3 SV=3;tr|A0A0G2QC62|A0A0G2QC62_RAT 60S ribosomal protein L29 OS=Rattus norvegicus OX=10116 PE=3 SV=1;sp|P25886|RL29_RAT 60S ribosomal protein L29 OS=Rattus norve	7	2	2	2	2	1	2	1	2	1	14.3	14.3	14.3	16.41	147	147;149;156;121;148;156;158	0	12.727	14.3	5.4	17109000	14005000	3103600	10129000	6873200	2	1	3				39	582;1075	True;True	585;1095	1103;1104;2053	1207;1208;2264	1207;2264
G3V6Y9;O55035	G3V6Y9;O55035	3;3	3;3	3;3	Peptidyl-prolyl cis-trans isomerase G	Ppig	tr|G3V6Y9|G3V6Y9_RAT Peptidyl-prolyl cis-trans isomerase G OS=Rattus norvegicus OX=10116 GN=Ppig PE=1 SV=1;sp|O55035|PPIG_RAT Peptidyl-prolyl cis-trans isomerase G OS=Rattus norvegicus OX=10116 GN=Ppig PE=1 SV=2	2	3	3	3	3	2	3	2	3	2	2.1	2.1	2.1	88.318	752	752;752	0	19.077	2.1	1.9	15315000	9000000	6314600	8702600	6393900	4	2	6				122	281;921;982	True;True;True	283;933;1001	532;1748;1749;1883;1884	586;1929;1930;2078;2079;2080;2081	586;1929;2080
A0A0H2UHQ1;F1LZX7;P24049;A0A0G2KB77;D3Z9G9;Q7TPJ7	A0A0H2UHQ1;F1LZX7;P24049;A0A0G2KB77;D3Z9G9	5;5;5;4;3;1	5;5;5;4;3;1	5;5;5;4;3;1	60S ribosomal protein L17	Rpl17	tr|A0A0H2UHQ1|A0A0H2UHQ1_RAT 60S ribosomal protein L17 OS=Rattus norvegicus OX=10116 GN=Rpl17 PE=1 SV=1;tr|F1LZX7|F1LZX7_RAT 60S ribosomal protein L17 OS=Rattus norvegicus OX=10116 GN=Rpl17 PE=1 SV=2;sp|P24049|RL17_RAT 60S ribosomal protein L17 OS=Rattus n	6	5	5	5	5	1	5	1	5	1	27	27	27	21.967	189	189;204;184;201;177;220	0	39.825	27	14.8	14923000	13706000	1217000	13706000	0	7	1	8				42	362;558;755;933;1289	True;True;True;True;True	364;561;765;945;1314	695;1051;1052;1400;1401;1770;1771;2576	759;1152;1153;1514;1515;1954;1955;2919	759;1152;1514;1955;2919
D3ZCR3;A0A0G2K6P4;P63159;D3ZXR5;D3ZC69;M0R7R5;D3ZIU9;F1LNG6;P52925;D3ZLG3;D3ZN59;F1M6B2	D3ZCR3;A0A0G2K6P4;P63159;D3ZXR5	8;8;8;6;3;3;3;3;3;2;2;1	8;8;8;6;3;3;3;3;3;2;2;1	8;8;8;6;3;3;3;3;3;2;2;1	High-mobility group (nonhistone chromosomal) protein 1-like 1	LOC108349189	tr|D3ZCR3|D3ZCR3_RAT High-mobility group (nonhistone chromosomal) protein 1-like 1 OS=Rattus norvegicus OX=10116 GN=LOC108349189 PE=4 SV=2;tr|A0A0G2K6P4|A0A0G2K6P4_RAT High-mobility group (nonhistone chromosomal) protein 1-like 1 OS=Rattus norvegicus OX=10	12	8	8	8	7	4	7	4	7	4	31.5	31.5	31.5	24.677	213	213;214;215;214;211;213;214;231;210;206;209;160	0	50.82	31.5	23.9	14319000	9664200	4655100	8484000	5674500	6	4	10				28	460;461;537;607;746;747;748;912	True;True;True;True;True;True;True;True	463;464;540;610;754;755;756;923	868;869;870;1015;1141;1382;1383;1384;1385;1386;1727	944;945;946;1106;1245;1494;1495;1496;1497;1498;1893	944;946;1106;1245;1494;1495;1498;1893
Q5PQR0;E9PTI6	Q5PQR0;E9PTI6	2;2	2;2	2;2	RALY heterogeneous nuclear ribonucleoprotein	Raly	tr|Q5PQR0|Q5PQR0_RAT RALY heterogeneous nuclear ribonucleoprotein OS=Rattus norvegicus OX=10116 GN=Raly PE=1 SV=1;tr|E9PTI6|E9PTI6_RAT RALY heterogeneous nuclear ribonucleoprotein OS=Rattus norvegicus OX=10116 GN=Raly PE=1 SV=2	2	2	2	2	1	2	1	2	1	2	9.2	9.2	9.2	31.049	295	295;311	0	13.267	5.1	9.2	14114000	6402900	7711000	7040000	6807500	1	2	3				103	1094;1231	True;True	1115;1255	2091;2092;2093;2406	2303;2304;2305;2700	2303;2700
F1M3H8	F1M3H8	6	6	6	Hypothetical protein LOC681410	LOC681410	tr|F1M3H8|F1M3H8_RAT Hypothetical protein LOC681410 OS=Rattus norvegicus OX=10116 GN=LOC681410 PE=1 SV=3	1	6	6	6	6	2	6	2	6	2	26.9	26.9	26.9	30.076	301	301	0	46.103	26.9	10.6	13512000	12617000	894730	12021000	1460400	7	2	9				113	113;128;129;260;261;328	True;True;True;True;True;True	115;130;131;262;263;330	203;235;236;237;498;499;500;630;631;632	222;254;255;256;549;550;551;692;693;694	222;254;255;550;551;692
P52164-2;P52164	P52164-2;P52164	5;5	5;5	5;5	Isoform Short of Protein max	Max	sp|P52164-2|MAX_RAT Isoform Short of Protein max OS=Rattus norvegicus OX=10116 GN=Max;sp|P52164|MAX_RAT Protein max OS=Rattus norvegicus OX=10116 GN=Max PE=1 SV=1	2	5	5	5	4	5	4	5	4	5	39.1	39.1	39.1	17.199	151	151;160	0	52.456	35.1	39.1	13359000	2881200	10478000	5527300	7469700	4	5	9				146	88;104;144;777;861	True;True;True;True;True	90;106;146;787;872	166;190;191;283;284;1447;1448;1616;1617	180;206;207;314;315;1563;1564;1752;1753	180;207;315;1564;1752
G3V9W0;G3V832	G3V9W0	5;1	5;1	5;1	Centrin 2	Cetn2	tr|G3V9W0|G3V9W0_RAT Centrin 2 OS=Rattus norvegicus OX=10116 GN=Cetn2 PE=1 SV=1	2	5	5	5	2	4	2	4	2	4	54.1	54.1	54.1	19.841	172	172;172	0	45.977	16.9	44.8	13312000	5366400	7945700	7290900	5746700	3	4	7				123	26;600;721;745;1213	True;True;True;True;True	26;603;725;753;1237	47;1129;1130;1131;1132;1332;1381;2334	50;1233;1234;1235;1236;1442;1493;2587	50;1235;1442;1493;2587
P26801	P26801	2	2	2	CCAAT/enhancer-binding protein gamma	Cebpg	sp|P26801|CEBPG_RAT CCAAT/enhancer-binding protein gamma OS=Rattus norvegicus OX=10116 GN=Cebpg PE=1 SV=2	1	2	2	2	1	2	1	2	1	2	30	30	30	16.388	150	150	0	13.978	9.3	30	12623000	3787300	8836000	5570600	6747500	1	2	3				143	158;1280	True;True	160;1305	309;2559;2560	342;2894;2895	342;2895
F1LNF1;F1LM82;A7VJC2-4;A7VJC2;A7VJC2-3;A7VJC2-2	F1LNF1;F1LM82;A7VJC2-4;A7VJC2;A7VJC2-3;A7VJC2-2	7;6;6;6;5;5	7;6;6;6;5;5	7;6;6;6;5;5	Heterogeneous nuclear ribonucleoproteins A2/B1	Hnrnpa2b1	tr|F1LNF1|F1LNF1_RAT Heterogeneous nuclear ribonucleoproteins A2/B1 OS=Rattus norvegicus OX=10116 GN=Hnrnpa2b1 PE=1 SV=1;tr|F1LM82|F1LM82_RAT Heterogeneous nuclear ribonucleoproteins A2/B1 OS=Rattus norvegicus OX=10116 GN=Hnrnpa2b1 PE=1 SV=3;sp|A7VJC2-4|RO	6	7	7	7	7	5	7	5	7	5	27.3	27.3	27.3	37.297	352	352;301;313;353;301;341	0	57.34	27.3	23.3	12560000	8629600	3930700	7455300	4969200	7	5	12				104	72;324;342;347;794;1009;1163	True;True;True;True;True;True;True	74;326;344;349;804;1028;1184	143;620;621;660;661;669;1491;1492;1929;1930;2231;2232	155;682;683;722;723;731;1624;1625;2129;2130;2463;2464	155;683;722;731;1624;2130;2464
Q00969-2;Q00969;G3V7X9	Q00969-2;Q00969	8;8;1	8;8;1	8;8;1	Isoform 2 of Cyclic AMP-dependent transcription factor ATF-2	Atf2	sp|Q00969-2|ATF2_RAT Isoform 2 of Cyclic AMP-dependent transcription factor ATF-2 OS=Rattus norvegicus OX=10116 GN=Atf2;sp|Q00969|ATF2_RAT Cyclic AMP-dependent transcription factor ATF-2 OS=Rattus norvegicus OX=10116 GN=Atf2 PE=1 SV=2	3	8	8	8	6	3	6	3	6	3	32.9	32.9	32.9	42.32	389	389;487;485	0	53.354	26.5	20.3	12362000	8207900	4153900	8207900	4010500	6	3	9				166	11;92;93;256;288;854;855;950	True;True;True;True;True;True;True;True	11;94;95;258;290;864;865;962	24;174;175;491;543;1602;1603;1814;1815	27;188;189;542;597;1738;1739;2004;2005	27;188;189;542;597;1738;1739;2004
Q6P6G9;Q5I0M7;P04256;D4ACJ7	Q6P6G9;Q5I0M7;P04256;D4ACJ7	3;3;3;2	3;3;3;2	3;3;3;2	Heterogeneous nuclear ribonucleoprotein A1	Hnrnpa1	tr|Q6P6G9|Q6P6G9_RAT Heterogeneous nuclear ribonucleoprotein A1 OS=Rattus norvegicus OX=10116 GN=Hnrnpa1 PE=1 SV=1;tr|Q5I0M7|Q5I0M7_RAT Heterogeneous nuclear ribonucleoprotein A1 OS=Rattus norvegicus OX=10116 GN=Hnrnpa1 PE=1 SV=1;sp|P04256|ROA1_RAT Heterog	4	3	3	3	3	1	3	1	3	1	11.5	11.5	11.5	33.619	313	313;320;320;255	0	19.924	11.5	5.1	11220000	8519700	2700000	8292800	2833600	4	1	5				135	799;800;1097	True;True;True	809;810;1118	1499;1500;2100;2101;2102	1632;1633;2315;2316;2317	1632;1633;2315
A0A0G2JYZ8;Q5U2Y2	A0A0G2JYZ8;Q5U2Y2	5;5	2;2	2;2	SATB homeobox 1	Satb1	tr|A0A0G2JYZ8|A0A0G2JYZ8_RAT SATB homeobox 1 OS=Rattus norvegicus OX=10116 GN=Satb1 PE=1 SV=1;tr|Q5U2Y2|Q5U2Y2_RAT DNA-binding protein SATB OS=Rattus norvegicus OX=10116 GN=Satb1 PE=1 SV=1	2	5	2	2	5	0	2	0	2	0	10.4	6.3	6.3	79.45	713	713;764	0	19.627	10.4	0	11162000	11162000	0	11162000	0	1	0	1				15	626;1041;1073;1132;1292	True;True;False;False;False	629;1061;1093;1153;1317	1170;1994;2051;2177;2581	1275;2204;2262;2408;2924	1275;2204;2262;2408;2924
A0A0G2K4G0	A0A0G2K4G0	10	9	9	Retinoic acid-induced 1	Rai1	tr|A0A0G2K4G0|A0A0G2K4G0_RAT Retinoic acid-induced 1 OS=Rattus norvegicus OX=10116 GN=Rai1 PE=1 SV=1	1	10	9	9	6	8	5	7	5	7	10.3	9.8	9.8	201.06	1887	1887	0	87.62	7	7.8	10668000	3756700	6911700	4780200	5649500	4	7	11				20	365;380;865;907;934;1001;1048;1137;1287;1315	False;True;True;True;True;True;True;True;True;True	367;382;876;918;946;1020;1068;1158;1312;1340	699;700;701;702;727;728;1624;1625;1720;1772;1917;2008;2009;2187;2572;2620	763;764;765;766;794;795;1760;1761;1886;1956;2115;2219;2220;2418;2915;2964	764;795;1760;1886;1956;2115;2220;2418;2915;2964
D3ZXH7	D3ZXH7	3	3	3	Aly/REF export factor	Alyref	tr|D3ZXH7|D3ZXH7_RAT Aly/REF export factor OS=Rattus norvegicus OX=10116 GN=Alyref PE=1 SV=1	1	3	3	3	2	1	2	1	2	1	14.3	14.3	14.3	19.915	189	189	0	24.356	12.7	8.5	10403000	7789400	2613100	0	2522800	2	1	3				86	17;18;1038	True;True;True	17;18;1058	33;34;1991	36;37;2201	36;37;2201
P43278	P43278	4	4	4	Histone H1.0	H1f0	sp|P43278|H10_RAT Histone H1.0 OS=Rattus norvegicus OX=10116 GN=H1f0 PE=2 SV=2	1	4	4	4	3	3	3	3	3	3	22.7	22.7	22.7	20.885	194	194	0	26.296	15.5	22.7	10264000	6688900	3574900	6824900	3315400	3	3	6				145	676;677;1024;1106	True;True;True;True	679;680;1043;1127	1254;1255;1256;1959;2118;2119	1364;1365;1366;2166;2335;2336	1364;1365;2166;2335
A0A0G2JWU7;F1LQ90;A0A0G2JXN5;Q62655-2;Q62655;A0A0G2K188;A0A0G2K030;P21677;P51514-3;P51514-2;P51514	A0A0G2JWU7;F1LQ90;A0A0G2JXN5;Q62655-2;Q62655	7;6;5;5;5;1;1;1;1;1;1	7;6;5;5;5;1;1;1;1;1;1	7;6;5;5;5;1;1;1;1;1;1	Transcription factor 4	Tcf4	tr|A0A0G2JWU7|A0A0G2JWU7_RAT Transcription factor 4 OS=Rattus norvegicus OX=10116 GN=Tcf4 PE=1 SV=1;tr|F1LQ90|F1LQ90_RAT Transcription factor 4 OS=Rattus norvegicus OX=10116 GN=Tcf4 PE=1 SV=3;tr|A0A0G2JXN5|A0A0G2JXN5_RAT Transcription factor 4 OS=Rattus no	11	7	7	7	2	5	2	5	2	5	17.5	17.5	17.5	71.481	669	669;585;548;585;589;537;649;649;682;706;707	0	42.053	5.8	11.7	10152000	2556500	7595200	0	7332800	3	4	7				12	160;386;433;665;770;918;1286	True;True;True;True;True;True;True	162;388;436;668;780;930;1311	311;741;822;1235;1433;1744;2571	344;345;808;895;1343;1549;1925;2914	345;808;895;1343;1549;1925;2914
P83883;F8WFR5	P83883;F8WFR5	3;2	3;2	3;2	60S ribosomal protein L36a	Rpl36a	sp|P83883|RL36A_RAT 60S ribosomal protein L36a OS=Rattus norvegicus OX=10116 GN=Rpl36a PE=1 SV=2;tr|F8WFR5|F8WFR5_RAT Similar to large subunit ribosomal protein L36a OS=Rattus norvegicus OX=10116 GN=RGD1566373 PE=4 SV=1	2	3	3	3	1	2	1	2	1	2	24.5	24.5	24.5	12.441	106	106;106	0	16.957	8.5	16	9843300	272040	9571300	0	9240700	1	2	3				164	405;528;597	True;True;True	408;531;600	779;996;1125	851;1087;1229	851;1087;1229
A0A0G2K5M1;A0A0G2JUC1	A0A0G2K5M1	4;1	4;1	4;1	Sp3 transcription factor	Sp3	tr|A0A0G2K5M1|A0A0G2K5M1_RAT Sp3 transcription factor OS=Rattus norvegicus OX=10116 GN=Sp3 PE=1 SV=1	2	4	4	4	0	4	0	4	0	4	7.6	7.6	7.6	75.419	714	714;398	0	42.786	0	7.6	9679800	0	9679800	0	9345500	0	6	6				24	275;459;1283;1284	True;True;True;True	277;462;1308;1309	525;866;867;2568;2569	577;942;943;2910;2911;2912	577;942;2910;2912
M0R4L7;G3V9C7;G3V8B3;D3ZWM5;D3ZLY9;A0A0G2JXE0;D3ZNH4;A0A0G2JXI9;Q00715;A0A0G2K7R1;M0RBQ5;D4A817;D3ZNZ9;Q00729	M0R4L7;G3V9C7;G3V8B3;D3ZWM5;D3ZLY9;A0A0G2JXE0;D3ZNH4;A0A0G2JXI9;Q00715;A0A0G2K7R1;M0RBQ5;D4A817;D3ZNZ9;Q00729	4;4;4;4;4;4;4;4;4;3;2;2;2;2	4;4;4;4;4;4;4;4;4;3;2;2;2;2	4;4;4;4;4;4;4;4;4;3;2;2;2;2	Histone H2B	Hist1h2bl	tr|M0R4L7|M0R4L7_RAT Histone H2B OS=Rattus norvegicus OX=10116 GN=Hist1h2bl PE=3 SV=1;tr|G3V9C7|G3V9C7_RAT Histone H2B OS=Rattus norvegicus OX=10116 GN=Hist1h2bk PE=3 SV=1;tr|G3V8B3|G3V8B3_RAT Histone H2B OS=Rattus norvegicus OX=10116 GN=Hist1h2bq PE=3 SV=	14	4	4	4	2	2	2	2	2	2	27.8	27.8	27.8	13.91	126	126;126;126;126;126;126;138;138;125;118;126;126;126;127	0	24.516	20.6	15.1	9429100	3668100	5760900	0	5562000	2	2	4				13	519;633;1088;1270	True;True;True;True	522;636;1109;1295	980;1183;2081;2541	1071;1288;2293;2876	1071;1288;2293;2876
Q9ESZ0	Q9ESZ0	5	5	5	DNA repair protein XRCC1	Xrcc1	sp|Q9ESZ0|XRCC1_RAT DNA repair protein XRCC1 OS=Rattus norvegicus OX=10116 GN=Xrcc1 PE=1 SV=2	1	5	5	5	3	5	3	5	3	5	15.1	15.1	15.1	68.835	631	631	0	49.752	10.3	15.1	9332400	2054700	7277600	2659900	6421100	3	5	8				195	14;634;647;1251;1369	True;True;True;True;True	14;637;650;1275;1395	29;30;1184;1185;1206;1207;2492;2730	32;33;1289;1290;1311;1312;2815;3078	33;1290;1312;2815;3078
D3ZU57	D3ZU57	1	1	1	Ribosomal oxygenase 1	Riox1	sp|D3ZU57|RIOX1_RAT Ribosomal oxygenase 1 OS=Rattus norvegicus OX=10116 GN=Riox1 PE=1 SV=1	1	1	1	1	1	1	1	1	1	1	2	2	2	67.454	597	597	0	6.874	2	2	9191200	5233600	3957600	4672800	4381700	2	1	3				81	302	TRUE	304	569;570;571	629;630;631	629
A0A0G2K6K9;F1M8W4;Q5U1X4	A0A0G2K6K9;F1M8W4;Q5U1X4	9;9;6	9;9;6	7;7;5	SRY box 5	Sox5	tr|A0A0G2K6K9|A0A0G2K6K9_RAT SRY box 5 OS=Rattus norvegicus OX=10116 GN=Sox5 PE=1 SV=1;tr|F1M8W4|F1M8W4_RAT SRY box 5 OS=Rattus norvegicus OX=10116 GN=Sox5 PE=1 SV=2;tr|Q5U1X4|Q5U1X4_RAT SRY box 5 OS=Rattus norvegicus OX=10116 GN=Sox5 PE=1 SV=1	3	9	9	7	9	0	9	0	7	0	18	18	14	75.22	679	679;763;392	0	57.38	18	0	8879400	8879400	0	7970600	0	10	0	10				27	79;103;464;478;529;730;866;1223;1293	True;True;True;True;True;True;True;True;True	81;105;467;481;532;734;735;877;1247;1318	151;189;874;900;997;1349;1350;1626;2394;2582	163;204;205;950;978;1088;1459;1460;1762;2688;2925	163;205;950;978;1088;1460;1762;2688;2925
F1LPS8;P86252	F1LPS8	8;1	3;1	3;1	Transcriptional activator protein Pur-alpha	Pura	tr|F1LPS8|F1LPS8_RAT Transcriptional activator protein Pur-alpha OS=Rattus norvegicus OX=10116 GN=Pura PE=1 SV=3	2	8	3	3	5	7	2	3	2	3	25.6	18	18	31.903	289	289;138	0	32.828	20.4	25.6	8490600	3326800	5163700	3708900	4603300	2	3	5				105	64;65;249;293;577;612;963;964	False;False;True;False;True;True;False;False	66;67;251;295;580;615;975;976	131;132;476;553;554;1096;1097;1147;1148;1839;1840;1841	143;144;527;610;611;1200;1201;1251;1252;2029;2030;2031	143;144;527;611;1201;1251;2030;2031
D4A0Y6	D4A0Y6	7	7	7	Marker of proliferation Ki-67	Mki67	tr|D4A0Y6|D4A0Y6_RAT Marker of proliferation Ki-67 OS=Rattus norvegicus OX=10116 GN=Mki67 PE=1 SV=2	1	7	7	7	4	5	4	5	4	5	3.5	3.5	3.5	343.35	3119	3119	0	49.769	2.2	2.4	8370300	3603400	4767000	4260000	3945700	4	4	8				88	73;484;610;744;792;1167;1191	True;True;True;True;True;True;True	75;487;613;752;802;1188;1214	144;909;1145;1380;1488;2238;2239;2286;2287	156;990;1249;1492;1621;2470;2471;2520;2521	156;990;1249;1492;1621;2471;2520
P62282	P62282	3	3	3	40S ribosomal protein S11	Rps11	sp|P62282|RS11_RAT 40S ribosomal protein S11 OS=Rattus norvegicus OX=10116 GN=Rps11 PE=1 SV=3	1	3	3	3	2	3	2	3	2	3	24.7	24.7	24.7	18.431	158	158	0	21.813	19.6	24.7	7766800	2076800	5690000	2745100	4825200	2	4	6				154	180;277;1271	True;True;True	182;279;1296	357;358;527;2542;2543;2544	403;404;579;2877;2878;2879	404;579;2878
Q63689	Q63689	5	5	5	Neurogenic differentiation factor 2	Neurod2	sp|Q63689|NDF2_RAT Neurogenic differentiation factor 2 OS=Rattus norvegicus OX=10116 GN=Neurod2 PE=1 SV=2	1	5	5	5	0	5	0	5	0	5	29.6	29.6	29.6	41.466	382	382	0	33.079	0	29.6	7728100	0	7728100	0	7461200	0	5	5				182	246;370;603;714;765	True;True;True;True;True	248;372;606;718;775	473;711;1135;1321;1423	524;775;1239;1431;1539	524;775;1239;1431;1539
D4ACV3;M0RDM4;Q6I8Q6;M0RCL5;G3V9C0;D3ZVK7;D3ZXP3;A9UMV8;Q64598;Q4FZT6;Q00728;P0CC09;P0C170;P0C169;P02262;A0A0A0MXW3;D4AEC0;D3ZWE0;P0C0S7	D4ACV3;M0RDM4;Q6I8Q6;M0RCL5;G3V9C0;D3ZVK7;D3ZXP3;A9UMV8;Q64598;Q4FZT6;Q00728;P0CC09;P0C170;P0C169;P02262;A0A0A0MXW3;D4AEC0;D3ZWE0;P0C0S7	2;2;2;2;2;2;2;2;2;2;2;2;2;2;2;1;1;1;1	2;2;2;2;2;2;2;2;2;2;2;2;2;2;2;1;1;1;1	2;2;2;2;2;2;2;2;2;2;2;2;2;2;2;1;1;1;1	Histone H2A	Hist2h2ac	tr|D4ACV3|D4ACV3_RAT Histone H2A OS=Rattus norvegicus OX=10116 GN=Hist2h2ac PE=3 SV=2;tr|M0RDM4|M0RDM4_RAT Histone H2A OS=Rattus norvegicus OX=10116 GN=LOC680322 PE=3 SV=1;tr|Q6I8Q6|Q6I8Q6_RAT Histone H2A OS=Rattus norvegicus OX=10116 GN=Hist1h2af PE=3 SV=	19	2	2	2	1	2	1	2	1	2	18.3	18.3	18.3	13.645	126	126;128;130;130;130;130;143;129;130;130;130;130;130;130;130;127;128;130;128	0	13.949	7.1	18.3	7265900	2498100	4767800	3108400	3992800	2	3	5				50	38;414	True;True	38;417	67;68;791	71;72;73;74;863	71;863
A0A096MIY0	A0A096MIY0	1	1	1	Distal-less homeobox 6	Dlx6	tr|A0A096MIY0|A0A096MIY0_RAT Distal-less homeobox 6 OS=Rattus norvegicus OX=10116 GN=Dlx6 PE=4 SV=1	1	1	1	1	1	1	1	1	1	1	8.6	8.6	8.6	19.677	175	175	0	7.6008	8.6	8.6	6865800	3532600	3333200	3532600	3218100	1	1	2				0	1065	TRUE	1085	2041;2042	2252;2253	2252
D3ZJ29	D3ZJ29	6	6	6	Uridine kinase-like 1 (Predicted)	Zfp512b	tr|D3ZJ29|D3ZJ29_RAT Uridine kinase-like 1 (Predicted) OS=Rattus norvegicus OX=10116 GN=Zfp512b PE=4 SV=1	1	6	6	6	2	4	2	4	2	4	10.3	10.3	10.3	96.153	875	875	0	37.213	4.7	8.6	6663900	2273700	4390200	0	4238500	2	3	5				77	5;188;522;965;966;1259	True;True;True;True;True;True	5;190;525;977;978;1284	12;372;984;1842;1843;2513	15;419;1075;2032;2033;2842	15;419;1075;2032;2033;2842
D3ZYS1	D3ZYS1	6	4	4	Purine-rich element-binding protein G	Purg	tr|D3ZYS1|D3ZYS1_RAT Purine-rich element-binding protein G OS=Rattus norvegicus OX=10116 GN=Purg PE=1 SV=1	1	6	4	4	3	6	1	4	1	4	21.9	18.8	18.8	39.834	351	351	0	25.609	5.4	21.9	6642200	765230	5876900	960100	5479100	0	4	4				87	251;294;423;576;686;1376	True;True;True;False;True;False	253;296;426;579;689;1402	480;555;806;807;1094;1095;1268;2742;2743;2744	531;612;878;879;1198;1199;1378;3090;3091;3092	531;612;878;1199;1378;3090
G3V669;Q64202	G3V669	3;1	3;1	3;1	Distal-less homeobox 1	Dlx1	tr|G3V669|G3V669_RAT Distal-less homeobox 1 OS=Rattus norvegicus OX=10116 GN=Dlx1 PE=4 SV=1	2	3	3	3	3	3	3	3	3	3	22	22	22	27.308	255	255;44	0	26.879	22	22	6400600	3825400	2575200	3881700	2430000	3	3	6				120	70;598;836	True;True;True	72;601;846	139;140;1126;1127;1562;1563	151;152;1230;1231;1696;1697	151;1231;1697
M0R440;A0A0G2K9Y9	M0R440;A0A0G2K9Y9	3;3	3;3	3;3	Zinc finger protein 326 (Fragment)	Zfp326	tr|M0R440|M0R440_RAT Zinc finger protein 326 (Fragment) OS=Rattus norvegicus OX=10116 GN=Zfp326 PE=1 SV=2;tr|A0A0G2K9Y9|A0A0G2K9Y9_RAT Zinc finger protein 326 OS=Rattus norvegicus OX=10116 GN=Zfp326 PE=1 SV=1	2	3	3	3	3	1	3	1	3	1	23.1	23.1	23.1	33.688	303	303;504	0	29.518	23.1	7.6	6282000	5302400	979610	4594700	1653500	3	1	4				35	798;945;1056	True;True;True	808;957;1076	1498;1802;2024;2025	1631;1991;2235;2236	1631;1991;2236
D4A601;B2RYT9	D4A601;B2RYT9	1;1	1;1	1;1	Translational activator of cytochrome c oxidase 1	Taco1	tr|D4A601|D4A601_RAT Translational activator of cytochrome c oxidase 1 OS=Rattus norvegicus OX=10116 GN=Taco1 PE=1 SV=3;sp|B2RYT9|TACO1_RAT Translational activator of cytochrome c oxidase 1 OS=Rattus norvegicus OX=10116 GN=Taco1 PE=2 SV=1	2	1	1	1	1	1	1	1	1	1	2.4	2.4	2.4	32.812	295	295;295	0.0054645	6.2761	2.4	2.4	5733700	1492800	4240900	1492800	4094400	1	1	2				53	749	TRUE	757	1387;1388	1499;1500	1500
Q923W4	Q923W4	5	3	3	Hepatoma-derived growth factor-related protein 3	Hdgfl3	sp|Q923W4|HDGR3_RAT Hepatoma-derived growth factor-related protein 3 OS=Rattus norvegicus OX=10116 GN=Hdgfl3 PE=1 SV=1	1	5	3	3	4	5	2	3	2	3	18.8	13.9	13.9	22.446	202	202	0	21.313	10.4	18.8	5669200	2072600	3596700	2700100	2844900	2	2	4				193	34;242;400;527;722	True;True;False;True;False	34;244;402;530;726	60;61;466;467;770;771;995;1333;1334	63;64;517;518;842;843;1086;1443;1444	63;517;842;1086;1443
P25977-2;P25977	P25977-2;P25977	5;5	5;5	5;5	Isoform UBF2 of Nucleolar transcription factor 1	Ubtf	sp|P25977-2|UBF1_RAT Isoform UBF2 of Nucleolar transcription factor 1 OS=Rattus norvegicus OX=10116 GN=Ubtf;sp|P25977|UBF1_RAT Nucleolar transcription factor 1 OS=Rattus norvegicus OX=10116 GN=Ubtf PE=1 SV=1	2	5	5	5	0	5	0	5	0	5	8.5	8.5	8.5	84.967	727	727;764	0	32.053	0	8.5	5666600	0	5666600	0	5470900	0	4	4				142	273;751;856;1211;1351	True;True;True;True;True	275;759;866;1235;1376	522;1390;1604;2332;2684	574;1502;1740;2585;3029	574;1502;1740;2585;3029
M0R7Q5;Q6TXJ0;P62243;D3ZIE1	M0R7Q5;Q6TXJ0;P62243;D3ZIE1	3;3;3;2	3;3;3;2	3;3;3;2	40S ribosomal protein S8	LOC100363452	tr|M0R7Q5|M0R7Q5_RAT 40S ribosomal protein S8 OS=Rattus norvegicus OX=10116 GN=LOC100363452 PE=3 SV=1;tr|Q6TXJ0|Q6TXJ0_RAT 40S ribosomal protein S8 OS=Rattus norvegicus OX=10116 GN=LOC297756 PE=2 SV=1;sp|P62243|RS8_RAT 40S ribosomal protein S8 OS=Rattus no	4	3	3	3	3	0	3	0	3	0	10.6	10.6	10.6	24.246	208	208;229;208;208	0	16.993	10.6	0	5663200	5663200	0	5663200	0	3	0	3				126	356;572;1335	True;True;True	358;575;1360	687;1085;2651	751;1189;2995	751;1189;2995
A0A0G2K4R7;Q5PQP1;F1LU19;F1M2F1;F1LYR6;F1LVI3	A0A0G2K4R7;Q5PQP1	3;3;1;1;1;1	3;3;1;1;1;1	3;3;1;1;1;1	RNA-binding motif, single-stranded-interacting protein 1	Rbms1	tr|A0A0G2K4R7|A0A0G2K4R7_RAT RNA-binding motif, single-stranded-interacting protein 1 OS=Rattus norvegicus OX=10116 GN=Rbms1 PE=1 SV=1;sp|Q5PQP1|RBMS1_RAT RNA-binding motif, single-stranded-interacting protein 1 OS=Rattus norvegicus OX=10116 GN=Rbms1 PE=2	6	3	3	3	3	1	3	1	3	1	12.4	12.4	12.4	43.775	403	403;403;398;414;430;444	0	24.878	12.4	3.7	5607700	3858900	1748800	2341500	3205900	2	1	3				21	266;398;701	True;True;True	268;400;704	508;766;767;1291	560;838;839;1401	560;839;1401
A0A0U1RRV7;Q0ZFS8	A0A0U1RRV7;Q0ZFS8	3;3	3;3	3;3	RCG61099, isoform CRA_b	Srsf3	tr|A0A0U1RRV7|A0A0U1RRV7_RAT RCG61099, isoform CRA_b OS=Rattus norvegicus OX=10116 GN=Srsf3 PE=1 SV=1;tr|Q0ZFS8|Q0ZFS8_RAT RCG61099, isoform CRA_c OS=Rattus norvegicus OX=10116 GN=Srsf3 PE=1 SV=1	2	3	3	3	2	2	2	2	2	2	41.9	41.9	41.9	14.203	124	124;164	0	17.208	21	28.2	5472300	2408100	3064200	2377600	2988900	2	2	4				46	25;797;1313	True;True;True	25;807;1338	45;46;1497;2617	48;49;1630;2961	49;1630;2961
Q62780	Q62780	1	1	1	Probable ATP-dependent RNA helicase DDX46	Ddx46	sp|Q62780|DDX46_RAT Probable ATP-dependent RNA helicase DDX46 OS=Rattus norvegicus OX=10116 GN=Ddx46 PE=1 SV=1	1	1	1	1	0	1	0	1	0	1	1.3	1.3	1.3	117.38	1032	1032	0.010363	5.9968	0	1.3	5451600	0	5451600	0	5263300	0	1	1				177	467	TRUE	470	877	953	953
D4A4L4	D4A4L4	1	1	1	MAP7 domain-containing 2	Map7d2	tr|D4A4L4|D4A4L4_RAT MAP7 domain-containing 2 OS=Rattus norvegicus OX=10116 GN=Map7d2 PE=1 SV=3	1	1	1	1	1	1	1	1	1	1	1.4	1.4	1.4	80.327	715	715	0.005291	6.0725	1.4	1.4	5188100	1442200	3745900	1442200	3616500	1	1	2				94	664	TRUE	667	1233;1234	1341;1342	1342
Q6PDW2;F1M1P0;F1LWH4;D4A870;D4A7B4;D4A4G9;D3ZZH9;D3ZPV5;D3ZPU6;D3ZPN7;D3ZMI8;D3ZLH3;D3ZKL4;D3ZEK2;D3ZE97;D3Z9G3;P20280	Q6PDW2;F1M1P0;F1LWH4;D4A870;D4A7B4;D4A4G9;D3ZZH9;D3ZPV5;D3ZPU6;D3ZPN7;D3ZMI8;D3ZLH3;D3ZKL4;D3ZEK2;D3ZE97;D3Z9G3;P20280	1;1;1;1;1;1;1;1;1;1;1;1;1;1;1;1;1	1;1;1;1;1;1;1;1;1;1;1;1;1;1;1;1;1	1;1;1;1;1;1;1;1;1;1;1;1;1;1;1;1;1	60S ribosomal protein L21	Rpl21	tr|Q6PDW2|Q6PDW2_RAT 60S ribosomal protein L21 OS=Rattus norvegicus OX=10116 GN=Rpl21 PE=2 SV=1;tr|F1M1P0|F1M1P0_RAT Uncharacterized protein OS=Rattus norvegicus OX=10116 PE=4 SV=1;tr|F1LWH4|F1LWH4_RAT Uncharacterized protein OS=Rattus norvegicus OX=10116	17	1	1	1	1	1	1	1	1	1	5.6	5.6	5.6	18.579	160	160;160;160;160;160;160;160;160;160;160;160;160;160;160;160;160;160	0.0054945	6.2837	5.6	5.6	5129400	2677000	2452400	2677000	2367700	0	1	1				69	1359	TRUE	1384	2700;2701	3046;3047	3047
F1M0L3	F1M0L3	2	2	2	Histone-lysine N-methyltransferase	Kmt2a	tr|F1M0L3|F1M0L3_RAT Histone-lysine N-methyltransferase OS=Rattus norvegicus OX=10116 GN=Kmt2a PE=1 SV=3	1	2	2	2	2	0	2	0	2	0	1	1	1	418.82	3843	3843	0	21.587	1	0	5010900	5010900	0	5010900	0	2	0	2				111	924;1011	True;True	936;1030	1755;1934;1935	1936;2134;2135	1936;2134
D3ZVI8;G3V7U5;D3ZSM5;A0A0G2JX73;E9PTS6;B5DEH3;Q01713;O08876	D3ZVI8	4;1;1;1;1;1;1;1	4;1;1;1;1;1;1;1	4;1;1;1;1;1;1;1	Kruppel-like factor 13	Klf13	tr|D3ZVI8|D3ZVI8_RAT Kruppel-like factor 13 OS=Rattus norvegicus OX=10116 GN=Klf13 PE=4 SV=1	8	4	4	4	0	4	0	4	0	4	22.9	22.9	22.9	14.561	131	131;244;404;464;501;612;244;480	0	26.342	0	22.9	4677600	0	4677600	0	4516000	0	5	5				83	276;403;889;1143	True;True;True;True	278;406;900;1164	526;777;1689;1690;2198	578;849;1851;1852;2429	578;849;1851;2429
Q6URK4-2;D4A6A2;E9PSU5	Q6URK4-2;D4A6A2;E9PSU5	9;7;6	1;1;1	1;1;1	Isoform 2 of Heterogeneous nuclear ribonucleoprotein A3	Hnrnpa3	sp|Q6URK4-2|ROA3_RAT Isoform 2 of Heterogeneous nuclear ribonucleoprotein A3 OS=Rattus norvegicus OX=10116 GN=Hnrnpa3;tr|D4A6A2|D4A6A2_RAT Heterogeneous nuclear ribonucleoprotein A3 OS=Rattus norvegicus OX=10116 GN=Hnrnpa3 PE=1 SV=3;tr|E9PSU5|E9PSU5_RAT Un	3	9	1	1	6	8	1	0	1	0	37.5	3.9	3.9	37.086	357	357;356;356	0	7.1972	32.8	33.6	4485600	4485600	0	4485600	0	2	0	2				187	309;327;435;438;699;1098;1337;1338;1350	False;False;False;False;True;False;False;False;False	311;329;438;441;702;1119;1362;1363;1375	585;586;625;626;627;628;629;825;829;830;831;832;1288;1289;2103;2104;2653;2654;2655;2683	646;647;687;688;689;690;691;898;902;903;904;905;1398;1399;2318;2319;2997;2998;2999;3028	647;690;898;905;1398;2318;2997;2999;3028
F1LW91;F7FF45	F1LW91;F7FF45	3;3	3;3	3;3	Nuclear mitotic apparatus protein 1	Numa1	tr|F1LW91|F1LW91_RAT Nuclear mitotic apparatus protein 1 OS=Rattus norvegicus OX=10116 GN=Numa1 PE=1 SV=2;tr|F7FF45|F7FF45_RAT Nuclear mitotic apparatus protein 1 OS=Rattus norvegicus OX=10116 GN=Numa1 PE=1 SV=2	2	3	3	3	1	3	1	3	1	3	2.7	2.7	2.7	226.91	2019	2019;2091	0	25.156	1.1	2.7	4195000	1986900	2208000	2502500	1616200	1	3	4				110	99;429;609	True;True;True	101;432;612	183;818;1143;1144	198;891;1247;1248	198;891;1248
A0A0G2K5E5;Q6MG07	A0A0G2K5E5;Q6MG07	1;1	1;1	1;1	Proline-rich protein 3	Prr3	tr|A0A0G2K5E5|A0A0G2K5E5_RAT Proline-rich protein 3 OS=Rattus norvegicus OX=10116 GN=Prr3 PE=4 SV=1;sp|Q6MG07|PRR3_RAT Proline-rich protein 3 OS=Rattus norvegicus OX=10116 GN=Prr3 PE=2 SV=1	2	1	1	1	0	1	0	1	0	1	5.2	5.2	5.2	17.267	154	154;186	0	6.5624	0	5.2	4025200	0	4025200	0	3886200	0	1	1				22	206	TRUE	208	402	449	449
Q3KRE8;P69897;P85108;Q4QRB4;B4F7C2;Q4QQV0;M0R8B6;CON__ENSEMBL:ENSBTAP00000025008;G3V7C6;P69897-2;Q6P9T8	Q3KRE8;P69897;P85108;Q4QRB4	3;2;2;2;1;1;1;1;1;1;1	3;2;2;2;1;1;1;1;1;1;1	3;2;2;2;1;1;1;1;1;1;1	Tubulin beta-2B chain	Tubb2b	sp|Q3KRE8|TBB2B_RAT Tubulin beta-2B chain OS=Rattus norvegicus OX=10116 GN=Tubb2b PE=1 SV=1;sp|P69897|TBB5_RAT Tubulin beta-5 chain OS=Rattus norvegicus OX=10116 GN=Tubb5 PE=1 SV=1;sp|P85108|TBB2A_RAT Tubulin beta-2A chain OS=Rattus norvegicus OX=10116 GN=	11	3	3	3	1	3	1	3	1	3	9.2	9.2	9.2	49.953	445	445;444;445;450;444;447;452;536;548;212;445	0	22.932	3.4	9.2	3912300	567220	3345100	1063300	2733500	1	3	4				167	50;481;592	True;True;True	51;484;595	90;91;905;1120	97;98;983;1224	98;983;1224
E9PT76;A0A0G2KB28;A0A0U1RVI9;D3ZIY7;D3ZT78;P27952;D3ZQW7;M0RAJ8;D3ZAS1	E9PT76;A0A0G2KB28;A0A0U1RVI9;D3ZIY7;D3ZT78;P27952;D3ZQW7	3;3;3;3;3;3;2;1;1	3;3;3;3;3;3;2;1;1	3;3;3;3;3;3;2;1;1	Uncharacterized protein	#VALUE!	tr|E9PT76|E9PT76_RAT Uncharacterized protein OS=Rattus norvegicus OX=10116 PE=3 SV=3;tr|A0A0G2KB28|A0A0G2KB28_RAT Uncharacterized protein OS=Rattus norvegicus OX=10116 PE=4 SV=1;tr|A0A0U1RVI9|A0A0U1RVI9_RAT RCG34378, isoform CRA_h OS=Rattus norvegicus OX=1	9	3	3	3	0	3	0	3	0	3	17.2	17.2	17.2	24.244	221	221;231;267;269;270;293;222;288;291	0	26.895	0	17.2	3895900	0	3895900	0	3761300	0	3	3				38	304;389;538	True;True;True	306;391;541	575;749;1016	635;816;1107	635;816;1107
D3ZQ79	D3ZQ79	4	4	4	PR/SET domain 10	Prdm10	tr|D3ZQ79|D3ZQ79_RAT PR/SET domain 10 OS=Rattus norvegicus OX=10116 GN=Prdm10 PE=1 SV=3	1	4	4	4	0	4	0	4	0	4	3.6	3.6	3.6	129.69	1146	1146	0	26.3	0	3.6	3695600	0	3695600	0	3568000	0	3	3				78	371;498;594;776	True;True;True;True	373;501;597;786	712;932;1122;1446	776;1016;1226;1562	776;1016;1226;1562
A0A0G2KA79;M0R5K9;A0A0H2UHT6;D3ZM33;P62271;D3ZAU6	A0A0G2KA79;M0R5K9;A0A0H2UHT6;D3ZM33;P62271	3;3;3;3;3;1	3;3;3;3;3;1	3;3;3;3;3;1	Uncharacterized protein	LOC100912024	tr|A0A0G2KA79|A0A0G2KA79_RAT Uncharacterized protein OS=Rattus norvegicus OX=10116 PE=1 SV=1;tr|M0R5K9|M0R5K9_RAT Uncharacterized LOC100912024 OS=Rattus norvegicus OX=10116 GN=LOC100912024 PE=3 SV=1;tr|A0A0H2UHT6|A0A0H2UHT6_RAT Ribosomal protein S18 OS=Rat	6	3	3	3	1	3	1	3	1	3	26	26	26	17.043	146	146;151;151;152;152;152	0	21.363	6.2	26	3528100	461180	3066900	710780	2711400	1	3	4				36	36;424;1272	True;True;True	36;427;1297	64;808;809;2545	68;880;881;2880	68;881;2880
B5DEY7	B5DEY7	5	5	5	Neurogenic differentiation factor	Neurod6	tr|B5DEY7|B5DEY7_RAT Neurogenic differentiation factor OS=Rattus norvegicus OX=10116 GN=Neurod6 PE=2 SV=1	1	5	5	5	0	5	0	5	0	5	24.6	24.6	24.6	38.653	337	337	0	31.724	0	24.6	3492100	0	3492100	0	3371500	0	5	5				54	369;444;715;731;986	True;True;True;True;True	371;447;719;736;1005	710;843;1322;1351;1891	774;919;1432;1461;2088	774;919;1432;1461;2088
D4A633	D4A633	4	2	2	Similar to Cas-associated zinc finger protein (Predicted), isoform CRA_b	Zfp362	tr|D4A633|D4A633_RAT Similar to Cas-associated zinc finger protein (Predicted), isoform CRA_b OS=Rattus norvegicus OX=10116 GN=Zfp362 PE=1 SV=1	1	4	2	2	1	4	0	2	0	2	21.1	15.6	15.6	45.672	418	418	0	19.165	2.4	21.1	3483900	0	3483900	0	3363600	0	2	2				96	118;458;651;988	False;True;True;False	120;461;654;1007	215;216;865;1212;1894	234;235;941;1317;2091	234;941;1317;2091
A0A0A0MXY4;A0A1W2Q676;A0A0G2JU73;F1LP64-2;F1LP64	A0A0A0MXY4;A0A1W2Q676;A0A0G2JU73;F1LP64-2;F1LP64	2;2;2;2;2	2;2;2;2;2	2;2;2;2;2	E3 ubiquitin-protein ligase TRIP12	Trip12	tr|A0A0A0MXY4|A0A0A0MXY4_RAT E3 ubiquitin-protein ligase TRIP12 OS=Rattus norvegicus OX=10116 GN=Trip12 PE=1 SV=2;tr|A0A1W2Q676|A0A1W2Q676_RAT E3 ubiquitin-protein ligase TRIP12 OS=Rattus norvegicus OX=10116 GN=Trip12 PE=1 SV=1;tr|A0A0G2JU73|A0A0G2JU73_RAT	5	2	2	2	1	2	1	2	1	2	2.6	2.6	2.6	218.1	1975	1975;1976;2038;1976;2025	0	15.803	0.9	2.6	3413100	1365100	2048000	1935500	1406800	1	1	2				3	27;33	True;True	27;33	48;49;59	51;52;62	51;62
D4A380;F1M7M2;Q80W90;P36198;Q80W90-2	D4A380;F1M7M2;Q80W90;P36198;Q80W90-2	2;2;2;2;1	2;2;2;2;1	2;2;2;2;1	LIM homeobox protein 2 (Predicted)	Lhx2	tr|D4A380|D4A380_RAT LIM homeobox protein 2 (Predicted) OS=Rattus norvegicus OX=10116 GN=Lhx2 PE=4 SV=1;tr|F1M7M2|F1M7M2_RAT LIM/homeobox protein Lhx2 OS=Rattus norvegicus OX=10116 GN=Lhx2 PE=4 SV=2;sp|Q80W90|LHX9_RAT LIM/homeobox protein Lhx9 OS=Rattus no	5	2	2	2	1	2	1	2	1	2	5.4	5.4	5.4	44.419	406	406;427;388;426;321	0	14.773	2.5	5.4	3252400	1082500	2169900	1263800	1913700	1	2	3				90	1126;1273	True;True	1147;1298	2169;2546;2547	2400;2881;2882	2400;2881
A0A0H2UHM7;Q6AYZ1;Q6P9V9;P68370;Q68FR8	A0A0H2UHM7;Q6AYZ1;Q6P9V9;P68370;Q68FR8	2;2;2;2;1	2;2;2;2;1	2;2;2;2;1	Tubulin alpha chain	LOC100909441	tr|A0A0H2UHM7|A0A0H2UHM7_RAT Tubulin alpha chain OS=Rattus norvegicus OX=10116 GN=LOC100909441 PE=3 SV=1;sp|Q6AYZ1|TBA1C_RAT Tubulin alpha-1C chain OS=Rattus norvegicus OX=10116 GN=Tuba1c PE=1 SV=1;sp|Q6P9V9|TBA1B_RAT Tubulin alpha-1B chain OS=Rattus norve	5	2	2	2	1	2	1	2	1	2	6.7	6.7	6.7	49.806	448	448;449;451;451;450	0	12.539	4.5	6.7	3147400	476100	2671300	674820	2380300	1	2	3				40	110;179	True;True	112;181	199;200;356	218;219;402	218;402
P61314	P61314	1	1	1	60S ribosomal protein L15	Rpl15	sp|P61314|RL15_RAT 60S ribosomal protein L15 OS=Rattus norvegicus OX=10116 GN=Rpl15 PE=1 SV=2	1	1	1	1	1	1	1	1	1	1	3.4	3.4	3.4	24.146	204	204	0.01005	5.9132	3.4	3.4	2908600	1348100	1560500	1348100	1506600	1	1	2				149	809	TRUE	819	1513;1514	1646;1647	1647
D4A249	D4A249	1	1	1	Metallo-beta-lactamase domain-containing 2	Mblac2	tr|D4A249|D4A249_RAT Metallo-beta-lactamase domain-containing 2 OS=Rattus norvegicus OX=10116 GN=Mblac2 PE=1 SV=1	1	1	1	1	0	1	0	1	0	1	3.6	3.6	3.6	31.189	279	279	0.0053191	6.0922	0	3.6	2839900	0	2839900	0	2741800	0	2	2				89	742	TRUE	750	1377;1378	1489;1490	1490
Q4V8G3;A0A0G2JTZ2	Q4V8G3;A0A0G2JTZ2	6;6	4;4	4;4	SRY (Sex determining region Y)-box 6	Sox6	tr|Q4V8G3|Q4V8G3_RAT SRY (Sex determining region Y)-box 6 OS=Rattus norvegicus OX=10116 GN=Sox6 PE=2 SV=1;tr|A0A0G2JTZ2|A0A0G2JTZ2_RAT SRY box 6 OS=Rattus norvegicus OX=10116 GN=Sox6 PE=4 SV=1	2	6	4	4	6	0	4	0	4	0	10.2	6.7	6.7	87.318	787	787;854	0	24.888	10.2	0	2736800	2736800	0	2736800	0	3	0	3				5	443;464;529;700;1061;1189	True;False;False;True;True;True	446;467;532;703;1081;1212	842;874;997;1290;2033;2284	918;950;1088;1400;2244;2518	918;950;1088;1400;2244;2518
A0A0G2JVK8;D3ZFT1	A0A0G2JVK8;D3ZFT1	2;2	2;2	2;2	Replication factor C subunit 1	Rfc1	tr|A0A0G2JVK8|A0A0G2JVK8_RAT Replication factor C subunit 1 OS=Rattus norvegicus OX=10116 GN=Rfc1 PE=1 SV=1;tr|D3ZFT1|D3ZFT1_RAT Replication factor C subunit 1 OS=Rattus norvegicus OX=10116 GN=Rfc1 PE=1 SV=2	2	2	2	2	0	2	0	2	0	2	4.4	4.4	4.4	72.983	656	656;1131	0	13.225	0	4.4	2577900	0	2577900	0	2488800	0	2	2				10	87;1162	True;True	89;1183	164;165;2230	178;179;2462	179;2462
F1M9G6;O88664	F1M9G6;O88664	1;1	1;1	1;1	Serine/threonine-protein kinase TAO1	Taok1	tr|F1M9G6|F1M9G6_RAT Serine/threonine-protein kinase TAO1 OS=Rattus norvegicus OX=10116 GN=Taok1 PE=1 SV=3;sp|O88664|TAOK1_RAT Serine/threonine-protein kinase TAO1 OS=Rattus norvegicus OX=10116 GN=Taok1 PE=1 SV=1	2	1	1	1	1	1	1	1	1	1	1.7	1.7	1.7	114.8	992	992;1001	0	8.4866	1.7	1.7	2549100	1222700	1326300	1222700	1280500	1	1	2				116	1113	TRUE	1134	2132;2133	2349;2350	2349
P63014-2;P63014;G3V7M9;A0A0G2JXV9;F1LN97;G3V8N6;M0R8Z6;G3V8L2;A0A0G2JYE6;G3V7E0;D3ZLM8;D3ZEM1;A0A0G2JZZ1;G3V653;A0A0G2KA42;O35750-2;O35750;Q62798;Q62782;Q63087;Q9JLT7-2;Q9JLT7;P97830;A6YP92	P63014-2;P63014;G3V7M9;A0A0G2JXV9;F1LN97;G3V8N6;M0R8Z6;G3V8L2;A0A0G2JYE6;G3V7E0;D3ZLM8;D3ZEM1;A0A0G2JZZ1;G3V653;A0A0G2KA42;O35750-2;O35750;Q62798;Q62782;Q63087;Q9JLT7-2;Q9JLT7;P97830;A6YP92	2;2;1;1;1;1;1;1;1;1;1;1;1;1;1;1;1;1;1;1;1;1;1;1	2;2;1;1;1;1;1;1;1;1;1;1;1;1;1;1;1;1;1;1;1;1;1;1	2;2;1;1;1;1;1;1;1;1;1;1;1;1;1;1;1;1;1;1;1;1;1;1	Isoform 2 of Paired mesoderm homeobox protein 1	Prrx1	sp|P63014-2|PRRX1_RAT Isoform 2 of Paired mesoderm homeobox protein 1 OS=Rattus norvegicus OX=10116 GN=Prrx1;sp|P63014|PRRX1_RAT Paired mesoderm homeobox protein 1 OS=Rattus norvegicus OX=10116 GN=Prrx1 PE=1 SV=1;tr|G3V7M9|G3V7M9_RAT Short stature homeobox	24	2	2	2	2	0	2	0	2	0	8.8	8.8	8.8	24.369	217	217;245;233;247;254;263;275;279;307;325;342;399;415;530;565;225;237;263;281;326;333;342;530;566	0	13.596	8.8	0	2456400	2456400	0	2456400	0	2	0	2				160	1194;1285	True;True	1217;1310	2291;2570	2525;2913	2525;2913
A0A0G2K1E3	A0A0G2K1E3	2	2	2	Lysine methyltransferase 2B	Kmt2b	tr|A0A0G2K1E3|A0A0G2K1E3_RAT Lysine methyltransferase 2B OS=Rattus norvegicus OX=10116 GN=Kmt2b PE=1 SV=1	1	2	2	2	1	2	1	2	1	2	1.6	1.6	1.6	294.91	2714	2714	0	12.735	1.1	1.6	2415000	890210	1524800	1274200	1088100	1	2	3				18	581;1006	True;True	584;1025	1102;1924;1925	1206;2124;2125	1206;2125
A0A0U1RRZ5;Q6MG48	A0A0U1RRZ5;Q6MG48	3;3	3;3	3;3	Protein PRRC2A	Prrc2a	tr|A0A0U1RRZ5|A0A0U1RRZ5_RAT Protein PRRC2A OS=Rattus norvegicus OX=10116 GN=Prrc2a PE=1 SV=1;sp|Q6MG48|PRC2A_RAT Protein PRRC2A OS=Rattus norvegicus OX=10116 GN=Prrc2a PE=1 SV=1	2	3	3	3	3	1	3	1	3	1	2.2	2.2	2.2	229.17	2162	2162;2161	0	21.312	2.2	0.7	2329500	1888200	441350	1567500	746760	3	1	4				48	39;111;616	True;True;True	39;113;619	69;70;201;1152	75;76;220;1256	75;220;1256
Q566E4;M0R735	Q566E4;M0R735	4;2	4;2	4;2	Heterogeneous nuclear ribonucleoprotein R	Hnrnpr	tr|Q566E4|Q566E4_RAT Heterogeneous nuclear ribonucleoprotein R OS=Rattus norvegicus OX=10116 GN=Hnrnpr PE=1 SV=1;tr|M0R735|M0R735_RAT Heterogeneous nuclear ribonucleoprotein Q OS=Rattus norvegicus OX=10116 GN=Syncrip PE=1 SV=2	2	4	4	4	0	4	0	4	0	4	5.9	5.9	5.9	70.873	632	632;562	0	23.533	0	5.9	2274200	0	2274200	0	2195700	0	4	4				172	989;1105;1145;1146	True;True;True;True	1008;1126;1166;1167	1895;2117;2200;2201	2092;2334;2431;2432	2092;2334;2431;2432
M0RDW5;Q9EQC9	M0RDW5;Q9EQC9	2;2	2;2	2;2	CXXC-type zinc finger protein 4	Cxxc4	tr|M0RDW5|M0RDW5_RAT CXXC-type zinc finger protein 4 OS=Rattus norvegicus OX=10116 GN=Cxxc4 PE=4 SV=1;sp|Q9EQC9|CXXC4_RAT CXXC-type zinc finger protein 4 OS=Rattus norvegicus OX=10116 GN=Cxxc4 PE=1 SV=1	2	2	2	2	0	2	0	2	0	2	5.8	5.8	5.8	36.444	365	365;198	0	12.461	0	5.8	2146300	0	2146300	0	2072200	0	2	2				131	614;1181	True;True	617;1203	1150;2265	1254;2498	1254;2498
O88553;F1LYQ2;F1LQU1	O88553;F1LYQ2;F1LQU1	3;2;2	3;2;2	3;2;2	Zinc finger protein 37	Zfp37	sp|O88553|ZFP37_RAT Zinc finger protein 37 OS=Rattus norvegicus OX=10116 GN=Zfp37 PE=1 SV=1;tr|F1LYQ2|F1LYQ2_RAT Zinc finger protein 37 OS=Rattus norvegicus OX=10116 GN=Zfp37 PE=4 SV=3;tr|F1LQU1|F1LQU1_RAT Zinc finger protein 37 OS=Rattus norvegicus OX=101	3	3	3	3	2	1	2	1	2	1	7.2	7.2	7.2	68.098	601	601;425;583	0	17.011	4.3	2.8	2130700	1769900	360750	1769900	0	1	1	2				133	784;1047;1275	True;True;True	794;1067;1300	1459;2007;2551	1575;2218;2886	1575;2218;2886
P62832	P62832	2	2	2	60S ribosomal protein L23	Rpl23	sp|P62832|RL23_RAT 60S ribosomal protein L23 OS=Rattus norvegicus OX=10116 GN=Rpl23 PE=2 SV=1	1	2	2	2	0	2	0	2	0	2	20	20	20	14.865	140	140	0	11.544	0	20	1991900	0	1991900	0	1923100	0	2	2				156	494;791	True;True	497;801	927;1487	1011;1620	1011;1620
O35410	O35410	5	3	3	Transcription factor USF-1	Usf1	tr|O35410|O35410_RAT Transcription factor USF-1 OS=Rattus norvegicus OX=10116 GN=Usf1 PE=1 SV=1	1	5	3	3	0	5	0	3	0	3	15.8	11.9	11.9	33.57	310	310	0	17.674	0	15.8	1990000	0	1990000	0	1921300	0	3	3				132	153;454;477;1149;1373	False;True;False;True;True	155;457;480;1170;1399	299;860;899;2204;2736	331;936;977;2435;3084	331;936;977;2435;3084
Q9R1T1	Q9R1T1	1	1	1	Barrier-to-autointegration factor	Banf1	sp|Q9R1T1|BAF_RAT Barrier-to-autointegration factor OS=Rattus norvegicus OX=10116 GN=Banf1 PE=1 SV=1	1	1	1	1	1	1	1	1	1	1	29.2	29.2	29.2	10.044	89	89	0	6.9596	29.2	29.2	1972500	1056400	916150	1056400	884500	1	1	2				199	417	TRUE	420	796;797	868;869	868
M0RA35	M0RA35	1	1	1	Solute carrier family 35, member F3	Slc35f3	tr|M0RA35|M0RA35_RAT Solute carrier family 35, member F3 OS=Rattus norvegicus OX=10116 GN=Slc35f3 PE=4 SV=2	1	1	1	1	0	1	0	1	0	1	1.8	1.8	1.8	44.281	396	396	0.010256	5.951	0	1.8	1941600	0	1941600	0	1874500	0	0	0				128	632	TRUE	635	1182	1287	1287
A0A0G2JY68;M0RCH8;Q7TQ86	A0A0G2JY68;M0RCH8;Q7TQ86	2;2;2	2;2;2	2;2;2	Ribosomal L1 domain-containing 1-like 1	Rsl1d1l1	tr|A0A0G2JY68|A0A0G2JY68_RAT Ribosomal L1 domain-containing 1-like 1 OS=Rattus norvegicus OX=10116 GN=Rsl1d1l1 PE=1 SV=1;tr|M0RCH8|M0RCH8_RAT Ribosomal L1 domain-containing 1-like 1 OS=Rattus norvegicus OX=10116 GN=Rsl1d1l1 PE=1 SV=2;tr|Q7TQ86|Q7TQ86_RAT A	3	2	2	2	2	0	2	0	2	0	5.2	5.2	5.2	51.488	460	460;464;540	0	13.515	5.2	0	1916100	1916100	0	1916100	0	2	0	2				14	107;514	True;True	109;517	195;974	214;1065	214;1065
B0BN99	B0BN99	1	1	1	High mobility group box 3	Hmgb3	tr|B0BN99|B0BN99_RAT High mobility group box 3 OS=Rattus norvegicus OX=10116 GN=Hmgb3 PE=1 SV=1	1	1	1	1	1	0	1	0	1	0	7.5	7.5	7.5	22.985	200	200	0.0056818	6.4627	7.5	0	1857800	1857800	0	1857800	0	0	0	0				51	545	TRUE	548	1023	1114	1114
A0A0G2K610;D3ZG44	A0A0G2K610;D3ZG44	2;2	2;2	2;2	Kruppel-like factor 12	Klf12	tr|A0A0G2K610|A0A0G2K610_RAT Kruppel-like factor 12 OS=Rattus norvegicus OX=10116 GN=Klf12 PE=1 SV=1;tr|D3ZG44|D3ZG44_RAT Kruppel-like factor 12 OS=Rattus norvegicus OX=10116 GN=Klf12 PE=1 SV=3	2	2	2	2	0	2	0	2	0	2	7.2	7.2	7.2	44.224	402	402;419	0	11.768	0	7.2	1829000	0	1829000	0	1765900	0	2	2				25	243;450	True;True	245;453	468;854	519;930	519;930
F1M5X4;F1M3E9	F1M5X4;F1M3E9	1;1	1;1	1;1	Uncharacterized protein	#VALUE!	tr|F1M5X4|F1M5X4_RAT Uncharacterized protein OS=Rattus norvegicus OX=10116 PE=1 SV=1;tr|F1M3E9|F1M3E9_RAT Uncharacterized protein OS=Rattus norvegicus OX=10116 PE=4 SV=3	2	1	1	1	1	0	1	0	1	0	12.1	12.1	12.1	13.731	124	124;124	0	12.858	12.1	0	1763900	1763900	0	1763900	0	1	0	1				112	233	TRUE	235	449	498	498
Q5M963;P69060	Q5M963;P69060	1;1	1;1	1;1	Cytidine monophosphate N-acetylneuraminic acid synthetase	Cmas	tr|Q5M963|Q5M963_RAT Cytidine monophosphate N-acetylneuraminic acid synthetase OS=Rattus norvegicus OX=10116 GN=Cmas PE=1 SV=1;sp|P69060|NEUA_RAT N-acylneuraminate cytidylyltransferase OS=Rattus norvegicus OX=10116 GN=Cmas PE=2 SV=1	2	1	1	1	0	1	0	1	0	1	3.5	3.5	3.5	48.14	432	432;432	0	9.4099	0	3.5	1724600	0	1724600	0	1665100	0	1	1				162	363	TRUE	365	696	760	760
M0RD75;P62755	M0RD75;P62755	1;1	1;1	1;1	40S ribosomal protein S6	Rps6	tr|M0RD75|M0RD75_RAT 40S ribosomal protein S6 OS=Rattus norvegicus OX=10116 GN=Rps6 PE=1 SV=1;sp|P62755|RS6_RAT 40S ribosomal protein S6 OS=Rattus norvegicus OX=10116 GN=Rps6 PE=1 SV=1	2	1	1	1	0	1	0	1	0	1	8.1	8.1	8.1	28.421	247	247;249	0	11.233	0	8.1	1654600	0	1654600	0	1597500	0	1	1				129	693	TRUE	696	1278	1388	1388
A0A0G2K5I8	A0A0G2K5I8	1	1	1	Zinc finger protein 62	Zfp62	tr|A0A0G2K5I8|A0A0G2K5I8_RAT Zinc finger protein 62 OS=Rattus norvegicus OX=10116 GN=Zfp62 PE=4 SV=1	1	1	1	1	1	1	1	1	1	1	1.4	1.4	1.4	105.25	917	917	0	6.5953	1.4	1.4	1605500	1124200	481270	1124200	464640	1	1	2				23	987	TRUE	1006	1892;1893	2089;2090	2089
Q4QQV8	Q4QQV8	1	1	1	Charged multivesicular body protein 5	Chmp5	sp|Q4QQV8|CHMP5_RAT Charged multivesicular body protein 5 OS=Rattus norvegicus OX=10116 GN=Chmp5 PE=2 SV=1	1	1	1	1	1	1	1	1	1	1	3.2	3.2	3.2	24.575	219	219	0	6.9378	3.2	3.2	1533800	805720	728090	805720	702940	1	1	2				170	736	TRUE	742	1359;1360	1469;1470	1470
A0A096MKG6;F1M6V1;Q6P747	A0A096MKG6;F1M6V1;Q6P747	2;2;2	2;2;2	2;2;2	Heterochromatin protein 1-binding protein 3 (Fragment)	Hp1bp3	tr|A0A096MKG6|A0A096MKG6_RAT Heterochromatin protein 1-binding protein 3 (Fragment) OS=Rattus norvegicus OX=10116 GN=Hp1bp3 PE=1 SV=1;tr|F1M6V1|F1M6V1_RAT Heterochromatin protein 1-binding protein 3 OS=Rattus norvegicus OX=10116 GN=Hp1bp3 PE=1 SV=3;sp|Q6P7	3	2	2	2	2	1	2	1	2	1	8.5	8.5	8.5	32.586	294	294;553;553	0	14.133	8.5	5.1	1483400	1155100	328340	844890	627170	2	1	3				2	697;1154	True;True	700;1175	1286;2217;2218	1396;2449;2450	1396;2449
A0A0H2UHR3;P08154	A0A0H2UHR3;P08154	2;2	2;2	2;2	Early growth response protein	Egr1	tr|A0A0H2UHR3|A0A0H2UHR3_RAT Early growth response protein OS=Rattus norvegicus OX=10116 GN=Egr1 PE=3 SV=1;sp|P08154|EGR1_RAT Early growth response protein 1 OS=Rattus norvegicus OX=10116 GN=Egr1 PE=1 SV=2	2	2	2	2	0	2	0	2	0	2	5.2	5.2	5.2	56.906	536	536;508	0	12.976	0	5.2	1343300	0	1343300	0	1296900	0	0	0				43	68;1185	True;True	70;1207	136;2271	148;2505	148;2505
P62268;F1LTW8;D4A9Q3	P62268;F1LTW8;D4A9Q3	2;1;1	2;1;1	2;1;1	40S ribosomal protein S23	Rps23	sp|P62268|RS23_RAT 40S ribosomal protein S23 OS=Rattus norvegicus OX=10116 GN=Rps23 PE=1 SV=3;tr|F1LTW8|F1LTW8_RAT Similar to ribosomal protein S23 OS=Rattus norvegicus OX=10116 GN=RGD1563705 PE=3 SV=2;tr|D4A9Q3|D4A9Q3_RAT Similar to ribosomal protein S23	3	2	2	2	1	1	1	1	1	1	21.7	21.7	21.7	15.807	143	143;143;143	0	11.599	8.4	13.3	1327400	294550	1032800	0	997170	1	1	2				152	46;357	True;True	47;359	86;688	93;752	93;752
D4AB03	D4AB03	2	2	2	Family with sequence similarity 120A	Fam120a	tr|D4AB03|D4AB03_RAT Family with sequence similarity 120A OS=Rattus norvegicus OX=10116 GN=Fam120a PE=1 SV=2	1	2	2	2	0	2	0	2	0	2	2.6	2.6	2.6	122.14	1115	1115	0	11.548	0	2.6	1277200	0	1277200	0	1233100	0	2	2				100	392;1070	True;True	394;1090	753;2048	821;2259	821;2259
Q62764-2;D4A0L4	Q62764-2;D4A0L4	21;18	1;1	1;1	Isoform 2 of Y-box-binding protein 3	Ybx3	sp|Q62764-2|YBOX3_RAT Isoform 2 of Y-box-binding protein 3 OS=Rattus norvegicus OX=10116 GN=Ybx3;tr|D4A0L4|D4A0L4_RAT Y-box-binding protein 3 OS=Rattus norvegicus OX=10116 GN=Ybx3 PE=1 SV=3	2	21	1	1	19	18	1	0	1	0	67.1	7.5	7.5	30.803	292	292;291	0	8.3913	67.1	59.6	1251500	1251500	0	1251500	0	1	0	1				176	35;194;195;299;756;758;759;772;773;774;958;1062;1063;1064;1115;1116;1257;1258;1268;1269;1357	False;False;False;False;True;False;False;False;False;False;False;False;False;False;False;False;False;False;False;False;False	35;196;197;301;766;768;769;782;783;784;970;1082;1083;1084;1136;1137;1282;1283;1293;1294;1382	62;63;383;384;385;386;387;560;561;1402;1407;1408;1409;1410;1411;1412;1436;1437;1438;1439;1440;1441;1442;1443;1444;1827;1828;2034;2035;2036;2037;2038;2039;2040;2135;2136;2137;2138;2139;2140;2141;2508;2509;2510;2511;2512;2536;2537;2538;2539;2540;2696;2697	65;66;67;430;431;432;433;434;617;618;619;1516;1521;1522;1523;1524;1525;1526;1552;1553;1554;1555;1556;1557;1558;1559;1560;2017;2018;2245;2246;2247;2248;2249;2250;2251;2352;2353;2354;2355;2356;2357;2358;2359;2837;2838;2839;2840;2841;2869;2870;2871;2872;2873;2874;2875;3042;3043	66;430;434;618;1516;1523;1525;1552;1554;1557;2017;2246;2247;2251;2354;2358;2837;2841;2874;2875;3042
Q63158	Q63158	1	1	1	RCG21090	Sp4	tr|Q63158|Q63158_RAT RCG21090 OS=Rattus norvegicus OX=10116 GN=Sp4 PE=2 SV=1	1	1	1	1	0	1	0	1	0	1	2.7	2.7	2.7	81.983	783	783	0	11.165	0	2.7	1234600	0	1234600	0	1191900	0	1	1				179	953	TRUE	965	1818	2008	2008
Q5XI68	Q5XI68	1	1	1	Protein Dr1	Dr1	sp|Q5XI68|NC2B_RAT Protein Dr1 OS=Rattus norvegicus OX=10116 GN=Dr1 PE=2 SV=1	1	1	1	1	1	1	1	1	1	1	8	8	8	19.429	176	176	0	7.8067	8	8	1186600	546640	639910	546640	617810	1	1	2				173	102	TRUE	104	187;188	202;203	202
A0A0G2JW97;M0RBF0;A0A0G2JZI0;O88453	A0A0G2JW97;M0RBF0;A0A0G2JZI0;O88453	1;1;1;1	1;1;1;1	1;1;1;1	Scaffold attachment factor B1	Safb	tr|A0A0G2JW97|A0A0G2JW97_RAT Scaffold attachment factor B1 OS=Rattus norvegicus OX=10116 GN=Safb PE=1 SV=1;tr|M0RBF0|M0RBF0_RAT Scaffold attachment factor B1 OS=Rattus norvegicus OX=10116 GN=Safb PE=1 SV=1;tr|A0A0G2JZI0|A0A0G2JZI0_RAT Scaffold attachment f	4	1	1	1	1	1	1	1	1	1	1.4	1.4	1.4	94.642	838	838;931;940;931	0	6.8013	1.4	1.4	1151100	597890	553210	597890	534110	1	1	2				11	767	TRUE	777	1428;1429	1544;1545	1544
Q66HB8	Q66HB8	2	2	2	Methyl-CpG-binding domain protein 1	Mbd1	tr|Q66HB8|Q66HB8_RAT Methyl-CpG-binding domain protein 1 OS=Rattus norvegicus OX=10116 GN=Mbd1 PE=2 SV=1	1	2	2	2	0	2	0	2	0	2	5.1	5.1	5.1	58.156	533	533	0	13.838	0	5.1	1091500	0	1091500	0	1053800	0	2	2				183	21;951	True;True	21;963	38;1816	41;2006	41;2006
P52909	P52909	1	1	1	Transcription factor jun-D	Jund	sp|P52909|JUND_RAT Transcription factor jun-D OS=Rattus norvegicus OX=10116 GN=Jund PE=1 SV=1	1	1	1	1	0	1	0	1	0	1	6.2	6.2	6.2	34.874	341	341	0.010204	5.9507	0	6.2	1068700	0	1068700	0	1031800	0	1	1				147	1074	TRUE	1094	2052	2263	2263
D3ZW57;D4AD70;P63174	D3ZW57;D4AD70;P63174	1;1;1	1;1;1	1;1;1	Similar to 60S ribosomal protein L38	LOC686066	tr|D3ZW57|D3ZW57_RAT Similar to 60S ribosomal protein L38 OS=Rattus norvegicus OX=10116 GN=LOC686066 PE=3 SV=2;tr|D4AD70|D4AD70_RAT Similar to 60S ribosomal protein L38 OS=Rattus norvegicus OX=10116 GN=RGD1561636 PE=3 SV=1;sp|P63174|RL38_RAT 60S ribosomal	3	1	1	1	0	1	0	1	0	1	18.8	18.8	18.8	7.9604	69	69;70;70	0.0052356	6.0637	0	18.8	1046200	0	1046200	0	1010000	0	1	1				84	531	TRUE	534	1002	1093	1093
G3V676;A0A0G2K6R4;Q9QYM0	G3V676;A0A0G2K6R4;Q9QYM0	1;1;1	1;1;1	1;1;1	Multidrug resistance-associated protein 5	Abcc5	tr|G3V676|G3V676_RAT Multidrug resistance-associated protein 5 OS=Rattus norvegicus OX=10116 GN=Abcc5 PE=4 SV=3;tr|A0A0G2K6R4|A0A0G2K6R4_RAT Multidrug resistance-associated protein 5 OS=Rattus norvegicus OX=10116 GN=Abcc5 PE=4 SV=1;sp|Q9QYM0|MRP5_RAT Multi	3	1	1	1	1	0	1	0	1	0	1.2	1.2	1.2	160.3	1434	1434;1436;1436	0.01	5.9044	1.2	0	1039800	1039800	0	1039800	0	1	0	1				29	430	TRUE	433	819	892	892
A0A0G2JUF8;A0A0G2JWP8;P41516	A0A0G2JUF8;A0A0G2JWP8;P41516	1;1;1	1;1;1	1;1;1	DNA topoisomerase 2	Top2a	tr|A0A0G2JUF8|A0A0G2JUF8_RAT DNA topoisomerase 2 OS=Rattus norvegicus OX=10116 GN=Top2a PE=1 SV=1;tr|A0A0G2JWP8|A0A0G2JWP8_RAT DNA topoisomerase 2 OS=Rattus norvegicus OX=10116 GN=Top2a PE=1 SV=1;sp|P41516|TOP2A_RAT DNA topoisomerase 2-alpha OS=Rattus norv	3	1	1	1	1	1	1	1	1	1	0.8	0.8	0.8	172.43	1520	1520;1528;1526	0	6.5804	0.8	0.8	1032500	0	1032500	0	996880	1	1	2				6	212	TRUE	214	414;415	461;462	462
Q9ERU2	Q9ERU2	2	2	2	Zinc finger protein 22	Znf22	sp|Q9ERU2|ZNF22_RAT Zinc finger protein 22 OS=Rattus norvegicus OX=10116 GN=Znf22 PE=2 SV=2	1	2	2	2	0	2	0	2	0	2	11	11	11	27.286	237	237	0	11.395	0	11	1007400	0	1007400	0	972590	0	2	2				194	130;990	True;True	132;1009	238;1896	257;2093	257;2093
A0A0G2JUJ1	A0A0G2JUJ1	1	1	1	RCG22661	Zfp524	tr|A0A0G2JUJ1|A0A0G2JUJ1_RAT RCG22661 OS=Rattus norvegicus OX=10116 GN=Zfp524 PE=4 SV=1	1	1	1	1	0	1	0	1	0	1	9.2	9.2	9.2	34.026	314	314	0	8.1962	0	9.2	995740	0	995740	0	961350	0	1	1				7	698	TRUE	701	1287	1397	1397
D4AE49	D4AE49	1	1	1	Ski2 like RNA helicase 2	Mtrex	tr|D4AE49|D4AE49_RAT Ski2 like RNA helicase 2 OS=Rattus norvegicus OX=10116 GN=Mtrex PE=1 SV=3	1	1	1	1	0	1	0	1	0	1	1.6	1.6	1.6	120.7	1066	1066	0	8.3745	0	1.6	946970	0	946970	0	914260	0	1	1				102	157	TRUE	159	308	341	341
D4A6N8	D4A6N8	2	2	2	T-box, brain, 1	Tbr1	tr|D4A6N8|D4A6N8_RAT T-box, brain, 1 OS=Rattus norvegicus OX=10116 GN=Tbr1 PE=1 SV=3	1	2	2	2	0	2	0	2	0	2	4.3	4.3	4.3	73.631	680	680	0	12.116	0	4.3	928920	0	928920	0	896830	0	2	2				97	149;1012	True;True	151;1031	290;1936	321;2136	321;2136
Q63396	Q63396	2	2	2	Activated RNA polymerase II transcriptional coactivator p15	Sub1	sp|Q63396|TCP4_RAT Activated RNA polymerase II transcriptional coactivator p15 OS=Rattus norvegicus OX=10116 GN=Sub1 PE=1 SV=3	1	2	2	2	2	0	2	0	2	0	16.5	16.5	16.5	14.441	127	127	0	12.45	16.5	0	918510	918510	0	918510	0	1	0	1				180	221;1374	True;True	223;1400	429;2737	477;3085	477;3085
P17325	P17325	1	1	1	Transcription factor AP-1	Jun	sp|P17325|JUN_RAT Transcription factor AP-1 OS=Rattus norvegicus OX=10116 GN=Jun PE=1 SV=1	1	1	1	1	1	1	1	1	1	1	4.5	4.5	4.5	36	334	334	0	7.5944	4.5	4.5	886070	375260	510810	375260	493170	1	1	2				140	818	TRUE	828	1528;1529	1661;1662	1661
A0A0G2JSX3;Q80T22	A0A0G2JSX3;Q80T22	1;1	1;1	1;1	Na+ dependent glucose transporter 1, isoform CRA_b	Naglt1	tr|A0A0G2JSX3|A0A0G2JSX3_RAT Na+ dependent glucose transporter 1, isoform CRA_b OS=Rattus norvegicus OX=10116 GN=Naglt1 PE=1 SV=1;sp|Q80T22|MFS4B_RAT Sodium-dependent glucose transporter 1 OS=Rattus norvegicus OX=10116 GN=Mfsd4b PE=1 SV=1	2	1	1	1	0	1	0	1	0	1	1.7	1.7	1.7	51.733	484	484;484	0.0055249	6.369	0	1.7	857510	0	857510	0	827890	0	1	1				4	1219	TRUE	1243	2344	2597	2597
D3ZIF0	D3ZIF0	1	1	1	Zinc finger protein 512	Zfp512	tr|D3ZIF0|D3ZIF0_RAT Zinc finger protein 512 OS=Rattus norvegicus OX=10116 GN=Zfp512 PE=1 SV=1	1	1	1	1	1	0	1	0	1	0	2.5	2.5	2.5	63.958	562	562	0.0055866	6.3845	2.5	0	848760	848760	0	848760	0	1	0	1				74	605	TRUE	608	1138	1242	1242
P21272-3;P21272-2;P21272	P21272-3;P21272-2;P21272	1;1;1	1;1;1	1;1;1	Isoform 3 of CCAAT/enhancer-binding protein beta	Cebpb	sp|P21272-3|CEBPB_RAT Isoform 3 of CCAAT/enhancer-binding protein beta OS=Rattus norvegicus OX=10116 GN=Cebpb;sp|P21272-2|CEBPB_RAT Isoform 2 of CCAAT/enhancer-binding protein beta OS=Rattus norvegicus OX=10116 GN=Cebpb;sp|P21272|CEBPB_RAT CCAAT/enhancer-b	3	1	1	1	1	1	1	1	1	1	11	11	11	15.567	145	145;276;297	0.010101	5.9168	11	11	835070	366210	468870	0	452670	0	0	0				141	13	TRUE	13	27;28	30;31	31
D4AA06	D4AA06	1	1	1	Nuclear receptor binding SET domain protein 1 (Predicted), isoform CRA_a	Nsd1	tr|D4AA06|D4AA06_RAT Nuclear receptor binding SET domain protein 1 (Predicted), isoform CRA_a OS=Rattus norvegicus OX=10116 GN=Nsd1 PE=1 SV=1	1	1	1	1	1	1	1	1	1	1	0.5	0.5	0.5	262.49	2381	2381	0	6.8202	0.5	0.5	821460	481420	340040	481420	328290	1	1	2				99	642	TRUE	645	1200;1201	1305;1306	1306
B1WBW3	B1WBW3	1	1	1	Zfp579 protein	Zfp579	tr|B1WBW3|B1WBW3_RAT Zfp579 protein OS=Rattus norvegicus OX=10116 GN=Zfp579 PE=2 SV=1	1	1	1	1	0	1	0	1	0	1	3	3	3	60.862	562	562	0	6.8562	0	3	801730	0	801730	0	774040	0	1	1				52	409	TRUE	412	785	857	857
F1LQM8	F1LQM8	1	1	1	MutS homolog 3	Msh3	tr|F1LQM8|F1LQM8_RAT MutS homolog 3 OS=Rattus norvegicus OX=10116 GN=Msh3 PE=4 SV=2	1	1	1	1	0	1	0	1	0	1	1.9	1.9	1.9	124.62	1104	1104	0	6.6516	0	1.9	798580	0	798580	0	771000	0	1	1				107	940	TRUE	952	1791	1980	1980
Q6AYI1	Q6AYI1	2	2	2	DEAD (Asp-Glu-Ala-Asp) box polypeptide 5	Ddx5	tr|Q6AYI1|Q6AYI1_RAT DEAD (Asp-Glu-Ala-Asp) box polypeptide 5 OS=Rattus norvegicus OX=10116 GN=Ddx5 PE=1 SV=1	1	2	2	2	1	1	1	1	1	1	3.9	3.9	3.9	69.238	615	615	0	11.425	2	2	762390	130420	631960	0	610130	0	1	1				184	635;769	True;True	638;779	1186;1432	1291;1548	1291;1548
R9PXZ9;Q3KRF1	R9PXZ9;Q3KRF1	2;2	2;2	2;2	Sp110 nuclear body protein	Sp110	tr|R9PXZ9|R9PXZ9_RAT Sp110 nuclear body protein OS=Rattus norvegicus OX=10116 GN=Sp110 PE=1 SV=2;sp|Q3KRF1|SP110_RAT Sp110 nuclear body protein OS=Rattus norvegicus OX=10116 GN=Sp110 PE=1 SV=1	2	2	2	2	0	2	0	2	0	2	5.6	5.6	5.6	53.162	478	478;478	0	13.341	0	5.6	754200	0	754200	0	728160	0	2	2				168	732;1037	True;True	737;1057	1352;1990	1462;2200	1462;2200
D3ZEI3	D3ZEI3	1	1	1	Zinc finger protein 821	Zfp821	tr|D3ZEI3|D3ZEI3_RAT Zinc finger protein 821 OS=Rattus norvegicus OX=10116 GN=Zfp821 PE=4 SV=1	1	1	1	1	0	1	0	1	0	1	2.9	2.9	2.9	46.814	413	413	0.0055556	6.3747	0	2.9	655520	0	655520	0	632880	0	1	1				72	689	TRUE	692	1272	1382	1382
Q5XIJ8	Q5XIJ8	1	1	1	Dynein regulatory complex subunit 2	Ccdc65	sp|Q5XIJ8|DRC2_RAT Dynein regulatory complex subunit 2 OS=Rattus norvegicus OX=10116 GN=Ccdc65 PE=2 SV=1	1	1	1	1	0	1	0	1	0	1	2	2	2	59.003	502	502	0.0052083	6.0629	0	2	654360	0	654360	0	631760	0	0	0				174	668	TRUE	671	1241	1351	1351
F2Z3R4	F2Z3R4	1	1	1	Nuclear factor 1	Nf1x	tr|F2Z3R4|F2Z3R4_RAT Nuclear factor 1 OS=Rattus norvegicus OX=10116 GN=Nf1x PE=1 SV=1	1	1	1	1	0	1	0	1	0	1	4.8	4.8	4.8	48.867	441	441	0.0053476	6.1027	0	4.8	627200	0	627200	0	605540	0	1	1				119	201	TRUE	203	395	442	442
P05964	P05964	1	1	1	Protein S100-A6	S100a6	sp|P05964|S10A6_RAT Protein S100-A6 OS=Rattus norvegicus OX=10116 GN=S100a6 PE=1 SV=3	1	1	1	1	1	0	1	0	1	0	7.9	7.9	7.9	10.035	89	89	0.0052632	6.069	7.9	0	618330	618330	0	618330	0	1	0	1				136	216	TRUE	218	421	469	469
M0R9Q1	M0R9Q1	1	1	1	RCG48334, isoform CRA_e	Rbm14	tr|M0R9Q1|M0R9Q1_RAT RCG48334, isoform CRA_e OS=Rattus norvegicus OX=10116 GN=Rbm14 PE=1 SV=1	1	1	1	1	1	1	1	1	1	1	1.6	1.6	1.6	69.493	669	669	0.010152	5.9364	1.6	1.6	607830	193500	414330	193500	400020	0	1	1				127	901	TRUE	912	1712;1713	1878;1879	1879
F1LQ48-2;F2Z3R2;F1LQ48	F1LQ48-2;F2Z3R2;F1LQ48	1;1;1	1;1;1	1;1;1	Isoform 2 of Heterogeneous nuclear ribonucleoprotein L	Hnrnpl	sp|F1LQ48-2|HNRPL_RAT Isoform 2 of Heterogeneous nuclear ribonucleoprotein L OS=Rattus norvegicus OX=10116 GN=Hnrnpl;tr|F2Z3R2|F2Z3R2_RAT Heterogeneous nuclear ribonucleoprotein L OS=Rattus norvegicus OX=10116 GN=Hnrnpl PE=1 SV=1;sp|F1LQ48|HNRPL_RAT Hetero	3	1	1	1	1	0	1	0	1	0	14.3	14.3	14.3	27.251	245	245;586;623	0.0099502	5.8862	14.3	0	595820	595820	0	595820	0	1	0	1				106	1339	TRUE	1364	2656	3000	3000
D3ZDN6	D3ZDN6	1	1	1	Similar to TTF-I interacting peptide 20; TIP20; Transcription Termination Factor I Interacting Peptide 20 (Predicted)	Zfp787	tr|D3ZDN6|D3ZDN6_RAT Similar to TTF-I interacting peptide 20; TIP20; Transcription Termination Factor I Interacting Peptide 20 (Predicted) OS=Rattus norvegicus OX=10116 GN=Zfp787 PE=1 SV=1	1	1	1	1	0	1	0	1	0	1	3.1	3.1	3.1	40.502	381	381	0.0054054	6.1218	0	3.1	567780	0	567780	0	548170	0	1	1				71	287	TRUE	289	542	596	596
Q4V8F6;Q6AYU5	Q4V8F6;Q6AYU5	1;1	1;1	1;1	Pcbp2 protein	Pcbp2	tr|Q4V8F6|Q4V8F6_RAT Pcbp2 protein OS=Rattus norvegicus OX=10116 GN=Pcbp2 PE=1 SV=1;tr|Q6AYU5|Q6AYU5_RAT Poly(rC)-binding protein 2 OS=Rattus norvegicus OX=10116 GN=Pcbp2 PE=1 SV=1	2	1	1	1	0	1	0	1	0	1	3.9	3.9	3.9	35.346	335	335;365	0	6.8005	0	3.9	559100	0	559100	0	539790	0	1	1				171	457	TRUE	460	864	940	940
F1M8F0	F1M8F0	1	1	1	RNA-binding motif protein 7	Rbm7	tr|F1M8F0|F1M8F0_RAT RNA-binding motif protein 7 OS=Rattus norvegicus OX=10116 GN=Rbm7 PE=1 SV=3	1	1	1	1	0	1	0	1	0	1	7.1	7.1	7.1	22.789	198	198	0.0056497	6.4618	0	7.1	497220	0	497220	0	480050	0	1	1				114	1203	TRUE	1226	2302	2536	2536
D3ZMQ9;A0A0G2JVH5	D3ZMQ9;A0A0G2JVH5	1;1	1;1	1;1	Helicase-like transcription factor	Hltf	tr|D3ZMQ9|D3ZMQ9_RAT Helicase-like transcription factor OS=Rattus norvegicus OX=10116 GN=Hltf PE=1 SV=1;tr|A0A0G2JVH5|A0A0G2JVH5_RAT Helicase-like transcription factor OS=Rattus norvegicus OX=10116 GN=Hltf PE=1 SV=1	2	1	1	1	0	1	0	1	0	1	1.4	1.4	1.4	110.04	974	974;1003	0.005618	6.4375	0	1.4	396800	0	396800	0	383100	0	0	0				9	1204	TRUE	1227	2303	2537	2537
A0A0G2K8K0	A0A0G2K8K0	1	1	1	Splicing factor proline and glutamine rich	Sfpq	tr|A0A0G2K8K0|A0A0G2K8K0_RAT Splicing factor proline and glutamine rich OS=Rattus norvegicus OX=10116 GN=Sfpq PE=1 SV=1	1	1	1	1	0	1	0	1	0	1	2.2	2.2	2.2	75.085	696	696	0.010309	5.9723	0	2.2	226840	0	226840	0	219010	0	1	1				34	257	TRUE	259	492	543	543
F1MAJ8	F1MAJ8	1	1	1	Zinc finger protein 91	Zfp91	tr|F1MAJ8|F1MAJ8_RAT Zinc finger protein 91 OS=Rattus norvegicus OX=10116 GN=Zfp91 PE=1 SV=2	1	1	1	1	1	0	1	0	1	0	2.1	2.1	2.1	63.193	568	568	0	6.5107	2.1	0	147540	147540	0	147540	0	1	0	1				117	1127	TRUE	1148	2170	2401	2401
